# Supplementary material for: The endoplasmic reticulum-associated mRNA-binding proteins ERBP1 and ERBP2 interact in bloodstream-form Trypanosoma brucei
Source: PeerJ. 2020 Feb 14;8:e8388. doi: 10.7717/peerj.8388 (PMC7025706; doi:10.7717/peerj.8388)
Supplement: Table S2 — Legend on the first sheet. [file peerj-08-8388-s005.xlsx]

## Sheet: Legend
Supplementary Table S2
TAP-ERBP1 was purified and associated RNAs were sequenced
Sheet 1: mRNAs that were enriched at least 2- fold in both purifications relative to all three controls.
Sheet 2: Reads and reads per million for a list of all unique open reading frames. TO calculate enrichmenet the RPM in the bound fraction was divided by RPM in controls. The minimal enrichment was found by dividing the lower of the two "bound" RPM by the highest of the WT RPM, or by the unbound RPM for experiment 3.
KEY
At least 3-fold enriched in both bound fractions relative to all three controls
2-3-fold enriched in both bound fractions relative to all three controls
At least 2-fold depleted in unbound fraction 3 relative to the average of wild-type

## Sheet: 1. Enriched mRNAs
Unique_list	Annotation	class	Bound 2 RPM	Bound 3 RPM	WT_A RPM	WT_B RPM	unbound 3 RPM	Lowest bound/highest WT	Lowest bound/unbound3	Lowest ratio	unbound/WT
Tb927.10.11080	paraflagellar rod protein,I17 antigen	Cytoskeleton	1216.8	936.8	153.6	272.7	408.9	3.44	2.29	2.29	1.92
Tb927.8.3530	glycerol-3-phosphate dehydrogenase [NAD ], glycosomal	Glucose.glycerol	1678.2	1279.5	580	497.4	408.9	2.21	3.13	2.21	0.76
Tb927.10.2020	hexokinase (HK2)	Glucose.glycerol	3802	2293.9	927.8	782.7	809	2.47	2.84	2.47	0.95
Tb927.11.11520	PEX11 glycosomal membrane protein	Glycosome	413.3	381.5	123	130.9	94.5	2.91	4.04	2.91	0.74
Tb927.9.1720	PMP4 peroxisomal membrane protein 4, putative	Glycosome	69.6	94.4	27.8	32.9	13.2	2.12	5.27	2.12	0.43
Tb927.11.600	Mitochondrial tRNA import	Mito.biogenesis	111	131.8	45.8	40.1	35.2	2.42	3.15	2.42	0.82
Tb927.11.16510	cytochrome b/c1 complex component, putative	Mito.e.transport	80.3	88	34.5	30.5	15.4	2.33	5.21	2.33	0.47
Tb927.10.13600	hypothetical protein, possible component of cytochorome oxidase complex	Mito.e.transport	47.2	64.1	21.8	17.1	15.4	2.17	3.06	2.17	0.79
Tb927.8.1490	SDH succinate dehydrogenase (complex II) subunit, putative	Mito.e.transport	87	79.5	28.9	33.2	17.6	2.39	4.52	2.39	0.57
Tb927.11.1270	Mitochondrial ATP synthase subunit, putative	Mito.pathway	107.7	140.9	50.7	50.4	46.2	2.12	2.33	2.12	0.91
Tb927.11.11870	Mitchondrial SSU ribosomal protein	Mito.translation	107.7	99.8	48.3	34.3	37.4	2.07	2.67	2.07	0.91
Tb927.10.5360	40S ribosomal protein S10	Ribosome	1517.5	1755.3	700.2	528.5	415.5	2.17	3.65	2.17	0.68
Tb927.11.4290	40S ribosomal protein S12	Ribosome	521	685.8	166.3	143.5	118.7	3.13	4.39	3.13	0.77
Tb927.7.2340	40S ribosomal protein S15	Ribosome	1567.2	2085.8	398.9	312.4	371.5	3.93	4.22	3.93	1.04
Tb927.7.1040	40S ribosomal protein S16	Ribosome	1750.3	2130.5	717.4	635.4	718.9	2.44	2.43	2.43	1.06
Tb927.10.5340	40S ribosomal protein S18	Ribosome	1070.2	1415.4	488.7	397.7	393.5	2.19	2.72	2.19	0.89
Tb927.4.1860	40S ribosomal protein S19	Ribosome	3926.3	3327.8	577.9	586.4	268.2	5.67	12.41	5.67	0.46
Tb927.10.14710	40S ribosomal protein S2	Ribosome	2209.1	2786	769.6	563.5	870.6	2.87	2.54	2.54	1.31
Tb927.10.3940	40S ribosomal protein S3A	Ribosome	2336.7	2810.4	833.4	783.1	962.9	2.8	2.43	2.43	1.19
Tb927.11.3590	40S ribosomal protein S4	Ribosome	1759.4	2195.9	827.7	727.6	861.8	2.13	2.04	2.04	1.11
Tb927.9.3920	40S ribosomal protein S7	Ribosome	2658.9	2706.6	565.6	519.6	419.9	4.7	6.33	4.7	0.77
Tb927.8.6150	40S ribosomal protein S8	Ribosome	2392.2	2936.4	903.5	794.4	883.8	2.65	2.71	2.65	1.04
Tb927.11.10910	40S ribosomal protein SA	Ribosome	1851.3	1870.9	875.3	706	314.4	2.12	5.89	2.12	0.4
Tb927.9.5690	60S acidic ribosomal protein	Ribosome	545	727.8	167	139.8	158.3	3.26	3.44	3.26	1.03
Tb927.6.5120	60S acidic ribosomal protein P2	Ribosome	550	708.4	200.9	216.8	46.2	2.54	11.9	2.54	0.22
Tb927.11.2060	60S acidic ribosomal subunit	Ribosome	2417.9	3197.3	996.5	740.2	674.9	2.43	3.58	2.43	0.78
Tb927.9.8070	60S ribosomal protein L10	Ribosome	2046.8	2285.3	668.1	588.2	696.9	3.06	2.94	2.94	1.11
Tb927.10.13500	60S ribosomal protein L10a	Ribosome	1528.3	1868.6	552.2	565.9	430.9	2.7	3.55	2.7	0.77
Tb927.9.7590	60S ribosomal protein L11	Ribosome	1846.3	2284.4	528.2	420.6	285.8	3.5	6.46	3.5	0.6
Tb927.3.3310	60S ribosomal protein L13	Ribosome	2576.9	2879	762.5	811.8	637.6	3.17	4.04	3.17	0.81
Tb927.7.5000	60S ribosomal protein L19	Ribosome	1801.6	2488	689.6	461.4	235.2	2.61	7.66	2.61	0.41
Tb927.7.5180	60S ribosomal protein L23a or L25	Ribosome	926.9	1120.1	455.6	388.8	312.2	2.03	2.97	2.03	0.74
Tb927.10.5480	60S ribosomal protein L24	Ribosome	1223.4	1144.9	436.2	355.9	259.4	2.62	4.41	2.62	0.65
Tb927.4.2180	60S ribosomal protein L35a	Ribosome	1065.2	970.2	463	437.4	184.7	2.1	5.25	2.1	0.41
Tb927.9.15210	60S ribosomal protein L36	Ribosome	677.6	711.1	288.6	222.7	92.3	2.35	7.34	2.35	0.36
Tb927.10.1590	60S ribosomal protein L36	Ribosome	453.1	545.4	185.3	151.4	85.7	2.45	5.29	2.45	0.51
Tb927.3.5050	60S ribosomal protein L4	Ribosome	2345.8	2750.8	858.4	818.7	745.3	2.73	3.15	2.73	0.89
Tb927.9.15150	60S ribosomal protein L5	Ribosome	1651.7	2141.8	618.1	425.4	349.6	2.67	4.72	2.67	0.67
Tb927.7.1740	60S ribosomal protein L7	Ribosome	1523.3	1914.2	528.6	424.8	362.8	2.88	4.2	2.88	0.76
Tb927.8.1330	60S ribosomal protein L7a	Ribosome	2731.8	2947.6	1110.3	872.1	892.6	2.46	3.06	2.46	0.9
Tb927.7.7380	LSm3	RNA.processing	38.1	40.2	14.4	13.4	4.4	2.65	8.66	2.65	0.32
Tb927.3.1250	DNA-directed RNA polymerase subunit, putative, (RPB10)	RNA.synthesis	32.3	46.5	9.9	8.6	15.4	3.26	2.1	2.1	1.66
Tb927.10.6320	NOC3, nuclear export of ribosomes, assoc with NRG1	rRNA.tRNA.process	113.5	110.6	55	51.7	46.2	2.01	2.39	2.01	0.87
Tb927.11.14020	RNA-binding protein (NRBD2)	rRNA.tRNA.process	2697.9	3016.3	729.4	663.5	314.4	3.7	8.58	3.7	0.45
Tb927.10.16140	Adenylate/guanylate cyclase, putative	Signalling	81.2	88.5	39.8	34.6	33	2.04	2.46	2.04	0.89
Tb927.9.8100	nascent polypeptide associated complex subunit	Translation	1189.5	1408.1	430.6	487.4	512.3	2.44	2.32	2.32	1.12
Tb927.11.2130	proteasome regulatory non-ATP-ase subunit 3 (RPN3)	Ubiquitin.proteasome	112.7	130	51.1	48	30.8	2.21	3.66	2.21	0.62
Tb927.10.12420	predicted S. cerevisiae Got1 homologue, predicted to be involved in ER-Golgi transport	Vesicular.transport	57.2	56.4	26.8	26.4	2.2	2.1	25.64	2.1	0.08
Tb927.1.3850	Sec61 beta family and TM domain	Vesicular.transport	125.1	171.1	45.1	45.6	55	2.74	2.27	2.27	1.21
Tb927.7.6770	Acyl CoA binding protein, putative	ZUnknown	162.4	205.9	57.1	64.1	72.6	2.53	2.24	2.24	1.2
Tb927.7.3220	Post-transcriptional activation. gamma-glutamyl cyclotransferase domain (glutathione degradation)	ZUnknown	74.5	72.7	31.7	28.4	33	2.29	2.2	2.2	1.1
Tb927.8.5040	EMG1/NEP1 methyltransferase, putative	ZUnknown	37.3	40.6	15.2	17.1	13.2	2.18	2.83	2.18	0.82
Tb927.11.4440	hypothetical protein, post-transcriptional activator, signal peptide	ZUnknown	27.3	29.8	4.6	5.8	4.4	4.71	6.2	4.71	0.85
Tb927.10.14050	hypothetical protein, signal peptide but cytoplasmic	ZUnknown	24.8	22.1	9.5	9.2	11	2.33	2.01	2.01	1.18
Tb927.10.7640	hypothetical protein, very basic	ZUnknown	19.1	29.8	4.6	4.8	6.6	3.98	2.89	2.89	1.4
Tb927.10.1760	hypothetical protein, signal peptide, cytoplasmic reticulated (ER?) OmpA-like domain	ZUnknown	41.4	30.2	9.2	7.9	13.2	3.28	2.29	2.29	1.54
Tb927.11.4370	hypothetical protein, conserved	ZUnknown	57.2	56	20.8	19.9	6.6	2.69	8.48	2.69	0.32
Tb927.9.2390	hypothetical protein, conserved	ZUnknown	91.9	104.7	37.4	31.9	15.4	2.46	5.97	2.46	0.44
Tb927.5.3060	hypothetical protein, conserved	ZUnknown	67.1	67.3	32.4	25	15.4	2.07	4.36	2.07	0.54
Tb927.11.14420	hypothetical protein, conserved, endocytic	ZUnknown	74.5	78.1	23.3	25.3	15.4	2.94	4.84	2.94	0.63
Tb927.8.4630	hypothetical protein, conserved, cytoplasm reticulated (ER?)	ZUnknown	67.1	105.2	22.2	27.1	22	2.48	3.05	2.48	0.89
Tb927.10.2070	hypothetical protein, conserved, cytoplasm reticulated and points	ZUnknown	44.7	57.3	14.8	15.1	15.4	2.96	2.9	2.9	1.03
Tb927.4.970	hypothetical protein, conserved, no clear yeast or human matches	ZUnknown	55.5	63.2	18.3	19.9	15.4	2.79	3.6	2.79	0.81
Tb927.10.12270	methyltransferase domain, cytoplasmic	ZUnknown	48	53.3	14.8	10.3	15.4	3.24	3.12	3.12	1.23

## Sheet: 2. WT and elution RNA BS reads
Unique_list	Annotation	class	bound 2 reads	bound 3 reads	WT_A reads	WT_B reads	unbound 3 reads	Bound 2 RPM	Bound 3 RPM	WT_A RPM	WT_B RPM	unbound 3 RPM	Log2 Bound 2 RPM	Log2 Bound 3 RPM	Log2 WT_A RPM	Log2 WT_B RPM	Log2 unbound 3 RPM	Lowest bound/highest WT	Lowest bound/unbound3	Lowest ratio	Less than 10 reads		Correlation coefficients	Log2 Bound 2 RPM	Log2 Bound 3 RPM	Log2 WT_A RPM	Log2 WT_B RPM	Log2 unbound 3 RPM
Tb927.10.3420	Not an ORF	3_UTR	21	13	54	116	32	17.4	5.9	19	39.7	70.4	4.121	2.5607	4.2479	5.3111	6.1375	0.15	0.08	0.08	0		Log2 Bound 2 RPM	1	0.95	0.86	0.84	0.74
Tb927.9.3280	acidocalcisomal exopolyphosphatase	Acidocalcisome	134	236	428	465	78	111	106.5	150.8	159.3	171.5	6.7944	6.7347	7.2365	7.3156	7.4221	0.67	0.62	0.62	0		Log2 Bound 3 RPM		1	0.84	0.81	0.72
Tb927.11.7060	acidocalcisomal pyrophosphatase (VSP1)	Acidocalcisome	406	1117	1269	1477	243	336.3	504.3	447.2	505.9	534.2	8.3936	8.9781	8.8048	8.9827	9.0612	0.66	0.63	0.63	0		Log2 WT_A RPM			1	0.98	0.82
Tb927.11.12220	catalytic subunit of the vacuolar transporter chaperone 4, polyphosphate polymerase, Vtc4	Acidocalcisome	120	279	211	235	46	99.4	126	74.4	80.5	101.1	6.6352	6.9773	6.2172	6.3309	6.6596	1.23	0.98	0.98	0		Log2 WT_B RPM				1	0.83
Tb927.10.5780	amino acid tansporter, putative	Amino.acid.transport	78	155	187	179	29	64.6	70	65.9	61.3	63.8	6.0135	6.1293	6.0422	5.9378	5.9955	0.98	1.01	0.98	0		Log2 unbound 3 RPM					1
Tb927.10.9850	amino acid transporter, putative	Amino.acid.transport	83	168	202	179	23	68.8	75.8	71.2	61.3	50.6	6.1043	6.2441	6.1538	5.9378	5.6611	0.97	1.36	0.97	0
Tb927.4.3930	amino acid transporter, putative	Amino.acid.transport	100	280	174	188	83	82.8	126.4	61.3	64.4	182.5	6.3716	6.9819	5.9378	6.009	7.5118	1.29	0.45	0.45	0
Tb927.8.5450	amino acid transporter, putative (AAT6)	Amino.acid.transport	138	389	869	960	146	114.3	175.6	306.2	328.8	321	6.8367	7.4561	8.2583	8.3611	8.3264	0.35	0.36	0.35	0
Tb927.8.4700	amino acid transporter, putative (AATP6)	Amino.acid.transport	332	637	784	866	211	275	287.6	276.3	296.6	463.9	8.1033	8.1679	8.1101	8.2124	8.8577	0.93	0.59	0.59	0
Tb927.10.6500	amino acid transporter, putative,amino acid permease, putative	Amino.acid.transport	78	157	174	164	26	64.6	70.9	61.3	56.2	57.2	6.0135	6.1477	5.9378	5.8125	5.8379	1.05	1.13	1.05	0
Tb927.6.4660	cationic amino acid transporter, putative	Amino.acid.transport	65	146	193	123	23	53.8	65.9	68	42.1	50.6	5.7495	6.0422	6.0875	5.3957	5.6611	0.79	1.06	0.79	0
Tb927.11.15840	L-Lysine transport protein, putative	Amino.acid.transport	804	2819	2169	2223	872	666	1272.7	764.3	761.5	1917.1	9.3794	10.3137	9.578	9.5727	10.9047	0.87	0.35	0.35	0
Tb927.9.10340	Polyamine transporter 1 (TbPOT1)	Amino.acid.transport	62	105	118	128	24	51.4	47.4	41.6	43.8	52.8	5.6837	5.5668	5.3785	5.4529	5.7225	1.08	0.9	0.9	0
Tb927.11.6680	Polyamine transporter 2 (TbPOT2)	Amino.acid.transport	90	162	259	258	29	74.5	73.1	91.3	88.4	63.8	6.2192	6.1918	6.5125	6.466	5.9955	0.8	1.15	0.8	0
Tb927.4.360	1,2-Dihydroxy-3-keto-5-methylthiopentene dioxygenase, putative	Amino.acids	170	455	471	554	42	140.8	205.4	166	189.8	92.3	7.1375	7.6823	7.375	7.5683	6.5283	0.74	1.53	0.74	0
Tb927.11.1560	1,2-Dihydroxy-3-keto-5-methylthiopentene dioxygenase, putative	Amino.acids	105	196	275	316	55	87	88.5	96.9	108.2	120.9	6.4429	6.4676	6.5984	6.7576	6.9177	0.8	0.72	0.72	0
Tb927.8.6060	2-amino-3-ketobutyrate coenzyme A ligase, putative,glycine acetyltransferase, putative	Amino.acids	192	401	420	465	58	159	181	148	159.3	127.5	7.3129	7.4998	7.2095	7.3156	6.9944	1	1.25	1	0
Tb927.11.6630	3-methylcrotonoyl-CoA carboxylase beta subunit, putative	Amino.acids	58	125	305	348	50	48	56.4	107.5	119.2	109.9	5.585	5.8176	6.7482	6.8972	6.78	0.4	0.44	0.4	0
Tb927.8.2020	agmatinase, putative	Amino.acids	132	230	273	302	23	109.3	103.8	96.2	103.4	50.6	6.7721	6.6977	6.588	6.6921	5.6611	1	2.05	1	0
Tb927.5.1280	alanine racemase, putative	Amino.acids	44	150	132	104	15	36.4	67.7	46.5	35.6	33	5.1859	6.0811	5.5392	5.1538	5.0444	0.78	1.1	0.78	0
Tb927.1.3000	aminoacylase, putative,N-acyl-L-amino acid amidohydrolase, zinc binding	Amino.acids	159	324	245	228	47	131.7	146.3	86.3	78.1	103.3	7.0411	7.1928	6.4313	6.2873	6.6907	1.53	1.27	1.27	0
Tb927.9.6170	arginine kinase (AK) in cytosol and flagellum	Amino.acids	1060	2396	2013	2323	267	878	1081.7	709.3	795.7	587	9.7781	10.0791	9.4703	9.6361	9.1972	1.1	1.5	1.1	0
Tb927.7.1110	asparagine synthetase a, putative	Amino.acids	205	528	474	570	145	169.8	238.4	167	195.3	318.8	7.4077	7.8972	7.3837	7.6095	8.3165	0.87	0.53	0.53	0
Tb927.10.3660	aspartate aminotransferase	Amino.acids	479	512	719	712	151	396.8	231.2	253.4	243.9	332	8.6323	7.853	7.9853	7.9301	8.375	0.91	0.7	0.7	0
Tb927.11.5090	aspartate aminotransferase, mitochondrial	Amino.acids	74	108	135	105	13	61.3	48.8	47.6	36	28.6	5.9378	5.6088	5.5729	5.1699	4.8379	1.03	1.71	1.03	0
Tb927.2.4590	branched-chain amino acid aminotransferase, putative	Amino.acids	332	641	1137	1121	140	275	289.4	400.6	384	307.8	8.1033	8.1769	8.646	8.585	8.2658	0.69	0.89	0.69	0
Tb927.11.2230	carnitine O-acetyltransferase, putative (CAT)	Amino.acids	207	519	406	446	95	171.5	234.3	143.1	152.8	208.9	7.4221	7.8722	7.1609	7.2555	7.7067	1.12	0.82	0.82	0
Tb927.10.470	choline dehydrogenase, putative	Amino.acids	66	139	172	147	13	54.7	62.8	60.6	50.4	28.6	5.7735	5.9727	5.9212	5.6554	4.8379	0.9	1.91	0.9	0
Tb927.9.12320	cystathione gamma lyase, putative	Amino.acids	143	449	516	476	142	118.5	202.7	181.8	163.1	312.2	6.8887	7.6632	7.5062	7.3496	8.2863	0.65	0.38	0.38	0
Tb11.02.5400	cystathionine beta-synthase, putative	Amino.acids	122	297	453	512	90	101.1	134.1	159.6	175.4	197.9	6.6596	7.0672	7.3183	7.4545	7.6286	0.58	0.51	0.51	0
Tb927.10.2750	deoxyhypusine synthase	Amino.acids	86	169	254	269	34	71.2	76.3	89.5	92.1	74.7	6.1538	6.2536	6.4838	6.5251	6.223	0.77	0.95	0.77	0
Tb927.1.870	deoxyhypusine synthase, putative	Amino.acids	96	205	237	255	40	79.5	92.6	83.5	87.3	87.9	6.3129	6.5329	6.3837	6.4479	6.4578	0.91	0.9	0.9	0
Tb927.7.5560	glucosamine-fructose-6-phosphate aminotransferase, putative	Amino.acids	114	186	392	413	71	94.4	84	138.1	141.5	156.1	6.5607	6.3923	7.1096	7.1447	7.2863	0.59	0.54	0.54	0
Tb927.5.3800	glutamine hydrolysing (not ammonia-dependent) carbomoyl phosphate synthase, putative	Amino.acids	497	586	1451	1415	204	411.7	264.6	511.3	484.7	448.5	8.6854	8.0477	8.998	8.9209	8.809	0.52	0.59	0.52	0
Tb927.7.4970	glutamine synthetase, putative	Amino.acids	121	263	434	457	58	100.2	118.7	152.9	156.5	127.5	6.6467	6.8912	7.2564	7.29	6.9944	0.64	0.79	0.64	0
Tb927.7.6940	glutaminyl cyclase, putative	Amino.acids	162	327	466	564	84	134.2	147.6	164.2	193.2	184.7	7.0682	7.2055	7.3593	7.594	7.529	0.69	0.73	0.69	0
Tb927.11.9670	glycine synthase, putative (GCVT1)	Amino.acids	72	222	174	159	19	59.6	100.2	61.3	54.5	41.8	5.8972	6.6467	5.9378	5.7682	5.3854	0.97	1.43	0.97	0
Tb927.1.1270	homocysteine S-methyltransferase, putative	Amino.acids	89	182	562	715	69	73.7	82.2	198	244.9	151.7	6.2036	6.3611	7.6294	7.936	7.2451	0.3	0.49	0.3	0
Tb927.6.4430	homoserine kinase and VSG silencing factor	Amino.acids	108	294	293	270	52	89.5	132.7	103.2	92.5	114.3	6.4838	7.052	6.6893	6.5314	6.8367	0.87	0.78	0.78	0
Tb927.11.1670	ISCS2, NFS cysteine desulfurase	Amino.acids	121	234	358	355	74	100.2	105.6	126.1	121.6	162.7	6.6467	6.7225	6.9784	6.926	7.3461	0.79	0.62	0.62	0
Tb927.11.1540	isovaleryl-coA dehydrogenase, putative	Amino.acids	124	232	436	377	23	102.7	104.7	153.6	129.1	50.6	6.6823	6.7101	7.263	7.0123	5.6611	0.67	2.03	0.67	0
Tb927.9.2010	kynureninase, putative	Amino.acids	244	370	472	487	45	202.1	167	166.3	166.8	98.9	7.6589	7.3837	7.3776	7.382	6.6279	1	1.69	1	0
Tb927.10.11970	kynurenine aminotransferase, putative	Amino.acids	72	248	222	231	72	59.6	112	78.2	79.1	158.3	5.8972	6.8074	6.2891	6.3056	7.3065	0.75	0.38	0.38	0
Tb927.10.4460	leucine carboxyl methyltransferase, putative	Amino.acids	112	219	211	182	61	92.8	98.9	74.4	62.3	134.1	6.5361	6.6279	6.2172	5.9612	7.0672	1.25	0.69	0.69	0
Tb927.7.5920	mercaptopyruvate sulfurtransferase, putative (MST)	Amino.acids	55	91	88	132	16	45.6	41.1	31	45.2	35.2	5.511	5.3611	4.9542	5.4983	5.1375	0.91	1.17	0.91	0
Tb927.10.4000	methylglutaconyl-CoA hydratase, mitochondrial precursor, putative	Amino.acids	111	312	264	220	28	91.9	140.9	93	75.4	61.6	6.522	7.1385	6.5392	6.2365	5.9449	0.99	1.49	0.99	0
Tb927.7.7040	methylthioadenosine phosphorylase, putative (MTAP)	Amino.acids	357	448	507	567	72	295.7	202.3	178.7	194.2	158.3	8.208	7.6604	7.4814	7.6014	7.3065	1.04	1.28	1.04	0
Tb927.9.1960	nitrilase, putative	Amino.acids	164	377	661	709	102	135.8	170.2	232.9	242.9	224.2	7.0853	7.4111	7.8636	7.9242	7.8086	0.56	0.61	0.56	0
Tb927.7.1910	pyridoxal phosphate containing glycine decarboxylase, putative	Amino.acids	168	267	387	393	44	139.2	120.5	136.4	134.6	96.7	7.121	6.9129	7.0917	7.0725	6.5954	0.88	1.25	0.88	0
Tb927.8.3130	S-adenosyl-methyltransferase mraW-like protein, putative	Amino.acids	59	84	130	123	26	48.9	37.9	45.8	42.1	57.2	5.6118	5.2441	5.5173	5.3957	5.8379	0.83	0.66	0.66	0
Tb927.11.9590	S-adenosylhomocysteine hydrolase, putative	Amino.acids	1351	2697	2430	2302	412	1119.1	1217.6	856.3	788.5	905.8	10.1281	10.2498	9.742	9.623	9.823	1.31	1.24	1.24	0
Tb927.9.12910	selenocysteine lyase	Amino.acids	133	286	204	204	26	110.2	129.1	71.9	69.9	57.2	6.784	7.0123	6.1679	6.1272	5.8379	1.53	1.93	1.53	0
Tb927.7.4390	threonine synthase, putative	Amino.acids	102	297	341	350	81	84.5	134.1	120.2	119.9	178.1	6.4009	7.0672	6.9093	6.9057	7.4765	0.7	0.47	0.47	0
Tb927.1.4690	arginine N-methyltransferase (PRMT1)	Arg.methylation	151	195	276	298	38	125.1	88	97.3	102.1	83.5	6.9669	6.4594	6.6044	6.6738	6.3837	0.86	1.05	0.86	0
Tb927.10.3560	arginine N-methyltransferase, putative	Arg.methylation	111	182	483	548	43	91.9	82.2	170.2	187.7	94.5	6.522	6.3611	7.4111	7.5523	6.5622	0.44	0.87	0.44	0
Tb927.5.3960	arginine N-methyltransferase, type I (PRMT6)	Arg.methylation	100	199	204	207	36	82.8	89.8	71.9	70.9	79.1	6.3716	6.4886	6.1679	6.1477	6.3056	1.15	1.05	1.05	0
Tb927.10.640	arginine N-methyltransferase, type II (PRMT5)	Arg.methylation	100	189	396	354	59	82.8	85.3	139.5	121.3	129.7	6.3716	6.4145	7.1241	6.9224	7.019	0.59	0.64	0.59	0
Tb927.7.5490	arginine N-methyltransferase, type III (PRMT7)	Arg.methylation	98	130	222	213	23	81.2	58.7	78.2	73	50.6	6.3434	5.8753	6.2891	6.1898	5.6611	0.75	1.16	0.75	0
Tb927.10.370	calcineurin B subunit, putative	Calcium	47	105	74	98	18	38.9	47.4	26.1	33.6	39.6	5.2817	5.5668	4.706	5.0704	5.3074	1.16	0.98	0.98	0
Tb927.10.2880	calcium channel protein, putative	Calcium	667	793	1308	1282	177	552.5	358	460.9	439.1	389.1	9.1098	8.4838	8.8483	8.7784	8.604	0.78	0.92	0.78	0
Tb927.6.2720	calcium-binding protein, putative	Calcium	115	261	243	312	54	95.3	117.8	85.6	106.9	118.7	6.5744	6.8802	6.4195	6.7401	6.8912	0.89	0.8	0.8	0
Tb927.11.13020	calmodulin	Calcium	1571	2634	2418	2845	405	1301.3	1189.2	852	974.5	890.4	10.3457	10.2158	9.7347	9.9285	9.7983	1.22	1.34	1.22	0
Tb927.9.11230	calmodulin-like protein, putative,EF hand containing protein	Calcium	198	350	402	433	146	164	158	141.7	148.3	321	7.3576	7.3038	7.1467	7.2124	8.3264	1.07	0.49	0.49	0
Tb927.6.4710	calmodulin, putative	Calcium	133	307	448	469	56	110.2	138.6	157.9	160.7	123.1	6.784	7.1148	7.3029	7.3282	6.9437	0.69	0.9	0.69	0
Tb927.11.9790	calmodulin, putative	Calcium	127	269	437	591	52	105.2	121.4	154	202.4	114.3	6.717	6.9236	7.2668	7.6611	6.8367	0.52	0.92	0.52	0
Tb927.9.6130	calmodulin, putative	Calcium	82	210	305	340	59	67.9	94.8	107.5	116.5	129.7	6.0853	6.5668	6.7482	6.8642	7.019	0.58	0.52	0.52	0
Tb927.11.7940	calmodulin, putative	Calcium	124	188	245	298	29	102.7	84.9	86.3	102.1	63.8	6.6823	6.4077	6.4313	6.6738	5.9955	0.83	1.33	0.83	0
Tb927.11.3680	calmodulin, putative	Calcium	58	143	170	185	20	48	64.6	59.9	63.4	44	5.585	6.0135	5.9045	5.9864	5.4594	0.76	1.09	0.76	0
Tb927.4.3330	hypothetical protein, conserved, EF hand	Calcium	83	148	180	158	29	68.8	66.8	63.4	54.1	63.8	6.1043	6.0618	5.9864	5.7576	5.9955	1.05	1.05	1.05	0
Tb927.10.6960	hypothetical protein, conserved, EF hand superfamily (E-4)	Calcium	130	379	218	169	43	107.7	171.1	76.8	57.9	94.5	6.7509	7.4187	6.263	5.8555	6.5622	1.4	1.14	1.14	0
Tb927.11.17000	AIR9	Cell.cycle	1129	1684	1667	1625	285	935.2	760.3	587.4	556.6	626.6	9.8691	9.5704	9.1982	9.1205	9.2914	1.29	1.21	1.21	0
Tb927.10.15690	anaphase promoting complex, subunit 10-like protein	Cell.cycle	71	135	146	129	32	58.8	60.9	51.4	44.2	70.4	5.8777	5.9284	5.6837	5.466	6.1375	1.14	0.84	0.84	0
Tb927.11.8220	AUK1 aurora B kinase	Cell.cycle	93	174	238	286	62	77	78.6	83.9	98	136.3	6.2668	6.2965	6.3906	6.6147	7.0906	0.79	0.56	0.56	0
Tb927.7.5580	cell cycle associated protein MOB1-B (MOB1B)	Cell.cycle	67	173	119	135	17	55.5	78.1	41.9	46.2	37.4	5.7944	6.2873	5.3889	5.5298	5.225	1.2	1.48	1.2	0
Tb927.1.1060	Cell cycle checkpoint protein RAD1-like, putative	Cell.cycle	83	137	144	151	19	68.8	61.9	50.7	51.7	41.8	6.1043	5.9519	5.6639	5.6921	5.3854	1.2	1.48	1.2	0
Tb927.7.7360	cell division control protein 2 homolog 2,cdc2-related kinase (CRK2)	Cell.cycle	120	223	195	174	15	99.4	100.7	68.7	59.6	33	6.6352	6.6539	6.1022	5.8972	5.0444	1.45	3.01	1.45	0
Tb927.11.2710	cell division cycle 45 (CDC45), putative	Cell.cycle	87	120	148	166	41	72.1	54.2	52.2	56.9	90.1	6.1719	5.7602	5.706	5.8304	6.4935	0.95	0.6	0.6	0
Tb927.11.12430	cell division cycle phosphatase 14, putative	Cell.cycle	107	220	293	264	30	88.6	99.3	103.2	90.4	66	6.4692	6.6337	6.6893	6.4983	6.0444	0.86	1.34	0.86	0
Tb927.6.2150	cell division cycle protein 16, putative	Cell.cycle	138	250	266	223	47	114.3	112.9	93.7	76.4	103.3	6.8367	6.8189	6.55	6.2555	6.6907	1.2	1.09	1.09	0
Tb927.8.6500	cell division cycle protein, putative	Cell.cycle	115	211	306	261	45	95.3	95.3	107.8	89.4	98.9	6.5744	6.5744	6.7522	6.4822	6.6279	0.88	0.96	0.88	0
Tb927.1.3230	cell division cycle protein, putative	Cell.cycle	109	236	283	193	38	90.3	106.5	99.7	66.1	83.5	6.4967	6.7347	6.6395	6.0466	6.3837	0.91	1.08	0.91	0
Tb927.4.2260	Centrin1	Cell.cycle	75	160	287	268	42	62.1	72.2	101.1	91.8	92.3	5.9565	6.1739	6.6596	6.5204	6.5283	0.61	0.67	0.61	0
Tb927.8.1080	Centrin2	Cell.cycle	146	200	284	304	42	120.9	90.3	100.1	104.1	92.3	6.9177	6.4967	6.6453	6.7018	6.5283	0.87	0.98	0.87	0
Tb927.10.8710	Centrin3	Cell.cycle	71	175	159	205	11	58.8	79	56	70.2	24.2	5.8777	6.3038	5.8074	6.1334	4.5969	0.84	2.43	0.84	0
Tb927.7.3410	Centrin4 - basal bodies and bilobe	Cell.cycle	302	583	308	368	39	250.2	263.2	108.5	126.1	85.7	7.9669	8.04	6.7616	6.9784	6.4212	1.98	2.92	1.98	0
Tb927.11.13900	Centrin5	Cell.cycle	135	258	189	246	63	111.8	116.5	66.6	84.3	138.5	6.8048	6.8642	6.0575	6.3975	7.1137	1.33	0.81	0.81	0
Tb927.3.1610	CLK kinase	Cell.cycle	158	234	763	921	182	130.9	105.6	268.9	315.5	400.1	7.0323	6.7225	8.0709	8.3015	8.6442	0.33	0.26	0.26	0
Tb927.10.1070	CRK1 cdc2- like protein kinase	Cell.cycle	51	114	118	125	24	42.2	51.5	41.6	42.8	52.8	5.3992	5.6865	5.3785	5.4195	5.7225	0.99	0.8	0.8	0
Tb927.11.12310	CRK12 cdc2- like protein kinase	Cell.cycle	167	246	463	486	40	138.3	111.1	163.1	166.5	87.9	7.1117	6.7957	7.3496	7.3794	6.4578	0.67	1.26	0.67	0
Tb927.10.4990	CRK3 cdc2- like protein kinase	Cell.cycle	141	217	537	498	97	116.8	98	189.2	170.6	213.3	6.8679	6.6147	7.5638	7.4145	7.7367	0.52	0.46	0.46	0
Tb927.8.5390	CRK4 cdc2- like protein kinase	Cell.cycle	52	100	2351	2752	10	43.1	45.1	828.4	942.7	22	5.4296	5.4951	9.6942	9.8807	4.4594	0.05	1.96	0.05	0
Tb927.2.4510	CRK9	Cell.cycle	177	263	468	356	68	146.6	118.7	164.9	121.9	149.5	7.1957	6.8912	7.3654	6.9296	7.224	0.72	0.79	0.72	0
Tb927.3.4170	CRK9AP	Cell.cycle	48	137	110	126	27	39.8	61.9	38.8	43.2	59.4	5.3147	5.9519	5.278	5.433	5.8924	0.92	0.67	0.67	0
Tb927.10.9160	CYC12	Cell.cycle	137	292	388	317	65	113.5	131.8	136.7	108.6	142.9	6.8265	7.0422	7.0949	6.7629	7.1589	0.83	0.79	0.79	0
Tb927.8.6340	CYC2-like cyclin, putative (CYC10)	Cell.cycle	73	188	259	301	35	60.5	84.9	91.3	103.1	76.9	5.9189	6.4077	6.5125	6.6879	6.2649	0.59	0.79	0.59	0
Tb927.8.6350	CYC2-like cyclin, putative (CYC11)	Cell.cycle	109	150	104	127	35	90.3	67.7	36.6	43.5	76.9	6.4967	6.0811	5.1938	5.4429	6.2649	1.56	0.88	0.88	0
Tb927.7.7170	CYC2-like cyclin, putative (CYC4)	Cell.cycle	152	175	570	661	97	125.9	79	200.9	226.4	213.3	6.9761	6.3038	7.6503	7.8227	7.7367	0.35	0.37	0.35	0
Tb927.10.11440	CYC2-like cyclin, putative,G1 cyclin CycE4, putative (CYC5)	Cell.cycle	164	259	383	314	48	135.8	116.9	135	107.6	105.5	7.0853	6.8691	7.0768	6.7495	6.7211	0.87	1.11	0.87	0
Tb927.11.12610	cyclin 1,serine peptidase family S51, peptidase E, putative	Cell.cycle	74	149	207	191	9	61.3	67.3	72.9	65.4	19.8	5.9378	6.0725	6.1878	6.0312	4.3074	0.84	3.1	0.84	0
Tb927.11.14080	cyclin 2,G1 cyclin (CYC2)	Cell.cycle	82	162	475	569	52	67.9	73.1	167.4	194.9	114.3	6.0853	6.1918	7.3872	7.6066	6.8367	0.35	0.59	0.35	0
Tb927.6.1460	cyclin 3, mitotic cyclin, (CYC3)	Cell.cycle	144	261	537	674	115	119.3	117.8	189.2	230.9	252.8	6.8985	6.8802	7.5638	7.8511	7.9819	0.51	0.47	0.47	0
Tb927.11.16720	cyclin 6,mitotic cyclin (CYC6)	Cell.cycle	92	117	237	251	28	76.2	52.8	83.5	86	61.6	6.2517	5.7225	6.3837	6.4263	5.9449	0.61	0.86	0.61	0
Tb927.6.5020	cyclin 7, putative,CYC2-like cyclin, putative (CYC7)	Cell.cycle	23	38	101	89	63	19.1	17.2	35.6	30.5	138.5	4.2555	4.1043	5.1538	4.9307	7.1137	0.48	0.12	0.12	0
Tb927.11.14030	cyclin 9, CYC9	Cell.cycle	80	179	144	127	34	66.3	80.8	50.7	43.5	74.7	6.0509	6.3363	5.6639	5.4429	6.223	1.31	0.89	0.89	0
Tb927.11.11500	cyclin dependent kinase-binding protein, putative	Cell.cycle	182	260	299	317	41	150.8	117.4	105.4	108.6	90.1	7.2365	6.8753	6.7197	6.7629	6.4935	1.08	1.3	1.08	0
Tb927.11.16390	cyclin dependent kinases regulatory subunit, putative (CKS1)	Cell.cycle	47	125	121	124	45	38.9	56.4	42.6	42.5	98.9	5.2817	5.8176	5.4128	5.4094	6.6279	0.91	0.39	0.39	0
Tb927.7.3880	DYRK kinase	Cell.cycle	211	355	789	915	119	174.8	160.3	278	313.4	261.6	7.4496	7.3246	8.1189	8.2919	8.0312	0.51	0.61	0.51	0
Tb927.10.350	DYRK kinase	Cell.cycle	89	85	139	190	59	73.7	38.4	49	65.1	129.7	6.2036	5.263	5.6147	6.0246	7.019	0.59	0.3	0.3	0
Tb927.10.6330	KKT1 kinetochore protein	Cell.cycle	306	447	781	745	124	253.5	201.8	275.2	255.2	272.6	7.9858	7.6568	8.1043	7.9955	8.0906	0.73	0.74	0.73	0
Tb927.7.2110	KKT11 Kinetochore protein	Cell.cycle	114	223	458	629	61	94.4	100.7	161.4	215.5	134.1	6.5607	6.6539	7.3345	7.7515	7.0672	0.44	0.7	0.44	0
Tb927.8.1680	KKT12 Kinetochore protein	Cell.cycle	158	203	331	374	15	130.9	91.6	116.6	128.1	33	7.0323	6.5173	6.8654	7.0011	5.0444	0.72	2.78	0.72	0
Tb927.7.4860	KKT13 Kinetochore protein	Cell.cycle	62	126	90	77	4	51.4	56.9	31.7	26.4	8.8	5.6837	5.8304	4.9864	4.7225	3.1375	1.62	5.84	1.62	0
Tb927.10.7240	KKT14 Kinetochore protein	Cell.cycle	136	288	323	257	66	112.7	130	113.8	88	145.1	6.8163	7.0224	6.8304	6.4594	7.1809	0.99	0.78	0.78	0
Tb927.6.3760	KKT15 Kinetochore protein	Cell.cycle	56	140	136	135	9	46.4	63.2	47.9	46.2	19.8	5.5361	5.9819	5.582	5.5298	4.3074	0.97	2.34	0.97	0
Tb927.11.10000	KKT16 Kinetochore protein	Cell.cycle	119	250	481	503	66	98.6	112.9	169.5	172.3	145.1	6.6235	6.8189	7.4051	7.4288	7.1809	0.57	0.68	0.57	0
Tb927.3.2330	KKT17 Kinetochore protein	Cell.cycle	125	249	250	233	41	103.5	112.4	88.1	79.8	90.1	6.6935	6.8125	6.4611	6.3183	6.4935	1.17	1.15	1.15	0
Tb927.9.3800	KKT18 Kinetochore protein	Cell.cycle	113	248	338	359	34	93.6	112	119.1	123	74.7	6.5484	6.8074	6.896	6.9425	6.223	0.76	1.25	0.76	0
Tb927.11.10520	KKT2 kinetochore protein, tyrosine kinase, putative	Cell.cycle	166	313	385	316	55	137.5	141.3	135.7	108.2	120.9	7.1033	7.1426	7.0843	6.7576	6.9177	1.01	1.14	1.01	0
Tb927.8.4760	KKT20 Kinetochore protein	Cell.cycle	49	95	130	156	38	40.6	42.9	45.8	53.4	83.5	5.3434	5.4229	5.5173	5.7388	6.3837	0.76	0.49	0.49	0
Tb927.8.3680	KKT4 kinetochore protein	Cell.cycle	107	247	354	335	52	88.6	111.5	124.7	114.8	114.3	6.4692	6.8009	6.9623	6.843	6.8367	0.71	0.78	0.71	0
Tb927.7.4850	KKT5 Kinetochore protein	Cell.cycle	65	162	151	151	30	53.8	73.1	53.2	51.7	66	5.7495	6.1918	5.7334	5.6921	6.0444	1.01	0.82	0.82	0
Tb927.6.1210	KKT6 kinetochore protein	Cell.cycle	48	110	110	112	20	39.8	49.7	38.8	38.4	44	5.3147	5.6352	5.278	5.263	5.4594	1.03	0.9	0.9	0
Tb927.11.1030	KKT7 Kinetochore protein	Cell.cycle	166	329	642	629	89	137.5	148.5	226.2	215.5	195.7	7.1033	7.2143	7.8215	7.7515	7.6125	0.61	0.7	0.61	0
Tb927.4.5110	KKT8 Kinetochore protein	Cell.cycle	120	229	320	297	37	99.4	103.4	112.8	101.7	81.3	6.6352	6.6921	6.8176	6.6682	6.3452	0.88	1.22	0.88	0
Tb927.8.1150	KKT9 Kinetochore protein	Cell.cycle	157	263	633	682	113	130	118.7	223.1	233.6	248.4	7.0224	6.8912	7.8015	7.8679	7.9565	0.51	0.48	0.48	0
Tb927.7.1590	mitotic cyclin,cyclin CycB3 (CYC8)	Cell.cycle	81	103	107	139	36	67.1	46.5	37.7	47.6	79.1	6.0682	5.5392	5.2365	5.5729	6.3056	0.98	0.59	0.59	0
Tb927.11.7216	origin recognition complex subunit 1 (ORC1), (CDC6)	Cell.cycle	70	112	185	208	21	58	50.6	65.2	71.2	46.2	5.858	5.6611	6.0268	6.1538	5.5298	0.71	1.1	0.71	0
Tb927.9.10920	PK6 protein kinase, KKT3 kinetochore protein	Cell.cycle	178	375	581	685	110	147.4	169.3	204.7	234.6	241.8	7.2036	7.4034	7.6774	7.8741	7.9177	0.63	0.61	0.61	0
Tb927.8.4810	prohibitin 1 (PHB1)	Cell.cycle	226	566	300	295	33	187.2	255.5	105.7	101.1	72.6	7.5484	7.9972	6.7238	6.6596	6.1819	1.77	2.58	1.77	0
Tb927.10.4310	prohibitin 2, putative (PHB2)	Cell.cycle	115	311	281	284	31	95.3	140.4	99	97.3	68.2	6.5744	7.1334	6.6294	6.6044	6.0917	0.96	1.4	0.96	0
Tb927.11.6550	PUF nine target 1 (PNT1)	Cell.cycle	470	899	1385	1487	235	389.3	405.9	488	509.4	516.6	8.6047	8.665	8.9307	8.9927	9.0129	0.76	0.75	0.75	0
Tb927.10.6240	ras-like small GTPase, putative (TbRHP) spindle formation and mitosis	Cell.cycle	221	368	434	394	42	183.1	166.1	152.9	135	92.3	7.5165	7.3759	7.2564	7.0768	6.5283	1.09	1.8	1.09	0
Tb927.7.1190	regulator of chromosome condensation, putative	Cell.cycle	176	419	578	576	109	145.8	189.2	203.7	197.3	239.6	7.1878	7.5638	7.6703	7.6242	7.9045	0.72	0.61	0.61	0
Tb927.7.1210	regulator of chromosome condensation, putative	Cell.cycle	102	213	340	354	33	84.5	96.2	119.8	121.3	72.6	6.4009	6.588	6.9045	6.9224	6.1819	0.7	1.16	0.7	0
Tb927.3.1750	rev7, putative,mitotic spindle checkpoint component, putative	Cell.cycle	35	90	78	79	8	29	40.6	27.5	27.1	17.6	4.858	5.3434	4.7814	4.7602	4.1375	1.05	1.65	1.05	0
Tb927.4.3420	WEE1 protein kinase	Cell.cycle	134	264	257	246	27	111	119.2	90.6	84.3	59.4	6.7944	6.8972	6.5014	6.3975	5.8924	1.23	1.87	1.23	0
Tb927.7.1320	10 kDa heat shock protein, putative (HSP10)	Chaperone	570	980	906	934	191	472.1	442.4	319.3	319.9	419.9	8.8829	8.7892	8.3188	8.3215	8.7139	1.38	1.05	1.05	0
Tb927.2.5980	ATP-dependent Clp protease subunit, heat shock protein 104 (HSP104)	Chaperone	176	420	372	395	61	145.8	189.6	131.1	135.3	134.1	7.1878	7.5668	7.0345	7.08	7.0672	1.08	1.09	1.08	0
Tb927.2.3030	ATP-dependent Clp protease subunit, heat shock protein 78 (HSP78)	Chaperone	215	483	320	300	80	178.1	218.1	112.8	102.8	175.9	7.4765	7.7688	6.8176	6.6837	7.4586	1.58	1.01	1.01	0
Tb927.10.2290	chaperone protein DNAj, endoplasmatic reticulum	Chaperone	105	222	327	295	21	87	100.2	115.2	101.1	46.2	6.4429	6.6467	6.848	6.6596	5.5298	0.76	1.88	0.76	0
Tb927.9.12730	chaperone protein DNAj, endoplasmatic reticulum	Chaperone	79	200	182	157	6	65.4	90.3	64.1	53.8	13.2	6.0312	6.4967	6.0023	5.7495	3.7225	1.02	4.95	1.02	0
Tb927.2.5160	chaperone protein DNAj, putative	Chaperone	593	899	1202	1135	119	491.2	405.9	423.6	388.8	261.6	8.9402	8.665	8.7266	8.6029	8.0312	0.96	1.55	0.96	0
Tb927.1.1960	chaperone protein DNAj, putative	Chaperone	318	414	817	709	123	263.4	186.9	287.9	242.9	270.4	8.0411	7.5461	8.1694	7.9242	8.079	0.65	0.69	0.65	0
Tb927.10.14730	chaperone protein DNAj, putative	Chaperone	259	671	651	684	98	214.5	302.9	229.4	234.3	215.5	7.7448	8.2427	7.8417	7.8722	7.7515	0.92	1	0.92	0
Tb927.10.9840	chaperone protein DNAj, putative	Chaperone	137	316	578	600	56	113.5	142.7	203.7	205.5	123.1	6.8265	7.1568	7.6703	7.683	6.9437	0.55	0.92	0.55	0
Tb927.10.8540	chaperone protein DNAj, putative	Chaperone	227	420	460	462	76	188	189.6	162.1	158.3	167.1	7.5546	7.5668	7.3407	7.3065	7.3846	1.16	1.13	1.13	0
Tb927.2.3960	chaperone protein DNAj, putative	Chaperone	92	241	460	450	328	76.2	108.8	162.1	154.1	721.1	6.2517	6.7655	7.3407	7.2677	9.4941	0.47	0.11	0.11	0
Tb927.10.12640	chaperone protein DNAj, putative	Chaperone	112	224	456	601	94	92.8	101.1	160.7	205.9	206.7	6.5361	6.6596	7.3282	7.6858	7.6914	0.45	0.45	0.45	0
Tb927.6.3120	chaperone protein DNAj, putative	Chaperone	163	302	424	425	66	135	136.3	149.4	145.6	145.1	7.0768	7.0906	7.223	7.1859	7.1809	0.9	0.93	0.9	0
Tb927.1.4300	chaperone protein DNAj, putative	Chaperone	93	128	418	407	131	77	57.8	147.3	139.4	288	6.2668	5.853	7.2026	7.1231	8.1699	0.39	0.2	0.2	0
Tb927.11.5220	chaperone protein DNAj, putative	Chaperone	119	300	415	452	67	98.6	135.4	146.2	154.8	147.3	6.6235	7.0811	7.1918	7.2743	7.2026	0.64	0.67	0.64	0
Tb927.4.3980	chaperone protein DNAj, putative	Chaperone	167	342	413	362	47	138.3	154.4	145.5	124	103.3	7.1117	7.2705	7.1849	6.9542	6.6907	0.95	1.34	0.95	0
Tb927.7.990	chaperone protein DNAj, putative	Chaperone	145	238	408	487	54	120.1	107.4	143.8	166.8	118.7	6.9081	6.7469	7.1679	7.382	6.8912	0.64	0.9	0.64	0
Tb927.3.2290	chaperone protein DNAj, putative	Chaperone	155	233	393	441	38	128.4	105.2	138.5	151.1	83.5	7.0045	6.717	7.1137	7.2394	6.3837	0.7	1.26	0.7	0
Tb927.9.14180	chaperone protein DNAj, putative	Chaperone	131	257	389	306	69	108.5	116	137.1	104.8	151.7	6.7616	6.858	7.0991	6.7115	7.2451	0.79	0.72	0.72	0
Tb927.7.680	chaperone protein DNAj, putative	Chaperone	149	256	377	439	46	123.4	115.6	132.8	150.4	101.1	6.9472	6.853	7.0531	7.2327	6.6596	0.77	1.14	0.77	0
Tb927.8.8310	chaperone protein DNAj, putative	Chaperone	101	280	373	334	26	83.7	126.4	131.4	114.4	57.2	6.3872	6.9819	7.0378	6.8379	5.8379	0.64	1.46	0.64	0
Tb927.9.8160	chaperone protein DNAj, putative	Chaperone	65	172	369	399	63	53.8	77.7	130	136.7	138.5	5.7495	6.2798	7.0224	7.0949	7.1137	0.39	0.39	0.39	0
Tb927.11.16740	chaperone protein DNAj, putative	Chaperone	167	455	367	325	37	138.3	205.4	129.3	111.3	81.3	7.1117	7.6823	7.0146	6.7983	6.3452	1.07	1.7	1.07	0
Tb927.8.7010	chaperone protein DNAj, putative	Chaperone	148	301	345	355	61	122.6	135.9	121.6	121.6	134.1	6.9378	7.0864	6.926	6.926	7.0672	1.01	0.91	0.91	0
Tb927.7.740	chaperone protein DNAj, putative	Chaperone	106	250	327	341	83	87.8	112.9	115.2	116.8	182.5	6.4561	6.8189	6.848	6.8679	7.5118	0.75	0.48	0.48	0
Tb927.10.5040	chaperone protein DNAj, putative	Chaperone	133	249	319	294	27	110.2	112.4	112.4	100.7	59.4	6.784	6.8125	6.8125	6.6539	5.8924	0.98	1.86	0.98	0
Tb927.11.16980	chaperone protein DNAj, putative	Chaperone	106	221	311	283	57	87.8	99.8	109.6	96.9	125.3	6.4561	6.641	6.7761	6.5984	6.9692	0.8	0.7	0.7	0
Tb927.10.6610	chaperone protein DNAj, putative	Chaperone	185	377	300	247	28	153.2	170.2	105.7	84.6	61.6	7.2593	7.4111	6.7238	6.4026	5.9449	1.45	2.49	1.45	0
Tb927.10.12380	chaperone protein DNAj, putative	Chaperone	93	252	297	311	31	77	113.8	104.7	106.5	68.2	6.2668	6.8304	6.7101	6.7347	6.0917	0.72	1.13	0.72	0
Tb927.3.1760	chaperone protein DNAj, putative	Chaperone	111	267	292	258	43	91.9	120.5	102.9	88.4	94.5	6.522	6.9129	6.6851	6.466	6.5622	0.89	0.97	0.89	0
Tb927.7.540	chaperone protein DNAj, putative	Chaperone	79	208	290	246	57	65.4	93.9	102.2	84.3	125.3	6.0312	6.5531	6.6753	6.3975	6.9692	0.64	0.52	0.52	0
Tb927.6.3730	chaperone protein DNAj, putative	Chaperone	67	123	283	317	24	55.5	55.5	99.7	108.6	52.8	5.7944	5.7944	6.6395	6.7629	5.7225	0.51	1.05	0.51	0
Tb927.9.8410	chaperone protein DNAj, putative	Chaperone	65	171	269	290	16	53.8	77.2	94.8	99.3	35.2	5.7495	6.2705	6.5668	6.6337	5.1375	0.54	1.53	0.54	0
Tb927.10.12530	chaperone protein DNAj, putative	Chaperone	57	90	261	235	38	47.2	40.6	92	80.5	83.5	5.5607	5.3434	6.5236	6.3309	6.3837	0.44	0.49	0.44	0
Tb927.10.13830	chaperone protein DNAj, putative	Chaperone	81	163	259	249	39	67.1	73.6	91.3	85.3	85.7	6.0682	6.2016	6.5125	6.4145	6.4212	0.73	0.78	0.73	0
Tb927.4.2970	chaperone protein DNAj, putative	Chaperone	95	208	254	242	58	78.7	93.9	89.5	82.9	127.5	6.2983	6.5531	6.4838	6.3733	6.9944	0.88	0.62	0.62	0
Tb927.5.2880	chaperone protein DNAj, putative	Chaperone	104	220	244	255	22	86.1	99.3	86	87.3	48.4	6.4279	6.6337	6.4263	6.4479	5.5969	0.99	1.78	0.99	0
Tb927.11.1010	chaperone protein DNAj, putative	Chaperone	75	199	242	293	33	62.1	89.8	85.3	100.4	72.6	5.9565	6.4886	6.4145	6.6496	6.1819	0.62	0.86	0.62	0
Tb927.8.1030	chaperone protein DNAj, putative	Chaperone	54	154	242	259	39	44.7	69.5	85.3	88.7	85.7	5.4822	6.1189	6.4145	6.4709	6.4212	0.5	0.52	0.5	0
Tb927.9.10950	chaperone protein DNAj, putative	Chaperone	58	134	241	331	41	48	60.5	84.9	113.4	90.1	5.585	5.9189	6.4077	6.8253	6.4935	0.42	0.53	0.42	0
Tb927.3.1430	chaperone protein DNAj, putative	Chaperone	99	213	224	298	29	82	96.2	78.9	102.1	63.8	6.3576	6.588	6.302	6.6738	5.9955	0.8	1.29	0.8	0
Tb927.11.15130	chaperone protein DNAj, putative	Chaperone	93	236	221	240	17	77	106.5	77.9	82.2	37.4	6.2668	6.7347	6.2836	6.3611	5.225	0.94	2.06	0.94	0
Tb927.8.1010	chaperone protein DNAj, putative	Chaperone	62	160	210	233	22	51.4	72.2	74	79.8	48.4	5.6837	6.1739	6.2095	6.3183	5.5969	0.64	1.06	0.64	0
Tb927.7.4590	chaperone protein DNAj, putative	Chaperone	99	184	207	176	28	82	83.1	72.9	60.3	61.6	6.3576	6.3768	6.1878	5.9141	5.9449	1.12	1.33	1.12	0
Tb927.11.5710	chaperone protein DNAj, putative	Chaperone	61	140	195	183	47	50.5	63.2	68.7	62.7	103.3	5.6582	5.9819	6.1022	5.9704	6.6907	0.74	0.49	0.49	0
Tb927.4.650	chaperone protein DNAj, putative	Chaperone	116	165	181	198	24	96.1	74.5	63.8	67.8	52.8	6.5865	6.2192	5.9955	6.0832	5.7225	1.1	1.41	1.1	0
Tb927.6.3850	chaperone protein DNAj, putative	Chaperone	57	115	173	184	39	47.2	51.9	61	63	85.7	5.5607	5.6977	5.9307	5.9773	6.4212	0.75	0.55	0.55	0
Tb927.1.1230	chaperone protein DNAj, putative	Chaperone	50	127	161	117	9	41.4	57.3	56.7	40.1	19.8	5.3716	5.8405	5.8253	5.3255	4.3074	0.73	2.09	0.73	0
Tb927.8.4470	chaperone protein DNAj, putative	Chaperone	99	248	138	167	9	82	112	48.6	57.2	19.8	6.3576	6.8074	5.6029	5.8379	4.3074	1.43	4.14	1.43	0
Tb927.7.6200	chaperone protein DNAj, putative	Chaperone	53	117	113	120	24	43.9	52.8	39.8	41.1	52.8	5.4561	5.7225	5.3147	5.3611	5.7225	1.07	0.83	0.83	0
Tb927.7.6660	chaperone protein DNAj, putative	Chaperone	41	89	46	50	19	34	40.2	16.2	17.1	41.8	5.0875	5.3291	4.0179	4.0959	5.3854	1.99	0.81	0.81	0
Tb927.6.2170	co-chaperone GrpE, putative	Chaperone	177	303	253	289	61	146.6	136.8	89.2	99	134.1	7.1957	7.0959	6.479	6.6294	7.0672	1.38	1.02	1.02	0
Tb927.1.1720	cyclophilin 15, putative	Chaperone	154	292	272	294	18	127.6	131.8	95.8	100.7	39.6	6.9955	7.0422	6.582	6.6539	5.3074	1.27	3.22	1.27	0
Tb927.11.880	cyclophilin a,cyclophilin type peptidyl-prolyl cis-trans isomerase (CYPA)	Chaperone	2641	2695	2383	2515	342	2187.6	1216.7	839.7	861.5	751.9	11.0951	10.2488	9.7137	9.7507	9.5544	1.41	1.62	1.41	0
Tb927.2.1560	cyclophilin type peptidyl-prolyl cis-trans isomerase, putative (PPIase)	Chaperone	334	690	553	617	68	276.7	311.5	194.9	211.4	149.5	8.1122	8.2831	7.6066	7.7238	7.224	1.31	1.85	1.31	0
Tb927.9.3440	cyclophilin type peptidyl-prolyl cis-trans isomerase, putative (PPIase)	Chaperone	122	237	383	381	88	101.1	107	135	130.5	193.5	6.6596	6.7415	7.0768	7.0279	7.5962	0.75	0.52	0.52	0
Tb927.9.11740	cyclophilin type peptidyl-prolyl cis-trans isomerase, putative (PPIase)	Chaperone	60	122	242	221	37	49.7	55.1	85.3	75.7	81.3	5.6352	5.784	6.4145	6.2422	6.3452	0.58	0.61	0.58	0
Tb927.10.13220	cyclophilin type peptidyl-prolyl cis-trans isomerase, putative (PPIase)	Chaperone	106	166	209	230	43	87.8	74.9	73.6	78.8	94.5	6.4561	6.2269	6.2016	6.3001	6.5622	0.95	0.79	0.79	0
Tb927.9.14420	cyclophilin type peptidyl-prolyl cis-trans isomerase, putative (PPIase)	Chaperone	89	151	185	154	17	73.7	68.2	65.2	52.8	37.4	6.2036	6.0917	6.0268	5.7225	5.225	1.05	1.82	1.05	0
Tb927.7.4770	cyclophilin-type peptidyl-prolyl cis-trans isomerase, putative (PPIase)	Chaperone	756	1530	1132	1132	227	626.2	690.7	398.9	387.8	499.1	9.2905	9.4319	8.6399	8.5992	8.9632	1.57	1.25	1.25	0
Tb927.5.1370	cyclophilin-type peptidyl-prolyl cis-trans isomerase, putative (PPIase)	Chaperone	66	89	215	203	177	54.7	40.2	75.8	69.5	389.1	5.7735	5.3291	6.2441	6.1189	8.604	0.53	0.1	0.1	0
Tb927.7.280	cyclophilin-type peptidyl-prolyl cis-trans isomerase, putative (PPIase)	Chaperone	76	173	206	191	16	63	78.1	72.6	65.4	35.2	5.9773	6.2873	6.1819	6.0312	5.1375	0.87	1.79	0.87	0
Tb927.8.6910	cyclophilin-type peptidyl-prolyl cis-trans isomerase, putative (PPIase)	Chaperone	78	174	194	218	54	64.6	78.6	68.4	74.7	118.7	6.0135	6.2965	6.0959	6.223	6.8912	0.86	0.54	0.54	0
Tb927.8.5230	cyclophilin-type peptidyl-prolyl cis-trans isomerase, putative (PPIase)	Chaperone	101	204	173	174	18	83.7	92.1	61	59.6	39.6	6.3872	6.5251	5.9307	5.8972	5.3074	1.37	2.11	1.37	0
Tb927.8.2000	cyclophilin, putative (NCP1) (in PUF7-TAP)	Chaperone	220	363	460	494	46	182.2	163.9	162.1	169.2	101.1	7.5094	7.3567	7.3407	7.4026	6.6596	0.97	1.62	0.97	0
Tb927.5.1020	disulfide isomerase, putative	Chaperone	117	232	268	257	35	96.9	104.7	94.4	88	76.9	6.5984	6.7101	6.5607	6.4594	6.2649	1.03	1.26	1.03	0
Tb927.10.16100	FK506-binding protein (FKBP)-type peptidyl-prolyl isomerase	Chaperone	1091	1356	1081	1010	212	903.7	612.2	380.9	346	466.1	9.8197	9.2579	8.5733	8.4346	8.8645	1.61	1.31	1.31	0
Tb927.10.15590	FKBP-type peptidyl-prolyl cis-trans isomerase, conserved	Chaperone	146	291	353	327	85	120.9	131.4	124.4	112	186.9	6.9177	7.0378	6.9588	6.8074	7.5461	0.97	0.65	0.65	0
Tb927.10.15600	FKBP-type peptidyl-prolyl cis-trans isomerase, conserved	Chaperone	60	130	160	171	26	49.7	58.7	56.4	58.6	57.2	5.6352	5.8753	5.8176	5.8728	5.8379	0.85	0.87	0.85	0
Tb927.9.9860	GRP170, HSP70 and actin-like ATPase domains	Chaperone	333	1030	1953	2559	870	275.8	465	688.2	876.6	1912.7	8.1075	8.8611	9.4267	9.7758	10.9014	0.31	0.14	0.14	0
Tb927.7.710	heat shock 70 kDa protein, putative (HSP70.4)	Chaperone	472	804	991	1242	121	391	363	349.2	425.4	266	8.611	8.5038	8.4479	8.7327	8.0553	0.85	1.36	0.85	0
Tb927.7.1030	heat shock 70 kDa protein, putative (HSP70b)	Chaperone	142	349	580	588	40	117.6	157.6	204.4	201.4	87.9	6.8777	7.3001	7.6753	7.6539	6.4578	0.58	1.34	0.58	0
Tb927.3.3330	heat shock protein 20, putative	Chaperone	101	281	230	210	66	83.7	126.9	81	71.9	145.1	6.3872	6.9875	6.3399	6.1679	7.1809	1.03	0.58	0.58	0
Tb927.11.11330	heat shock protein 70, major HSP70	Chaperone	5735	8081	9964	9498	2239	4750.5	3648.3	3511	3253.5	4922.4	12.2139	11.833	11.7777	11.6678	12.2651	1.04	0.74	0.74	0
Tb927.10.10980	heat shock protein 83, HSP83	Chaperone	4911	6094	7896	7689	1453	4067.9	2751.3	2782.3	2633.8	3194.4	11.9901	11.4259	11.4421	11.3629	11.6413	0.99	0.86	0.86	0
Tb927.11.2650	heat shock protein 84, putative, mit HSp90	Chaperone	591	1000	1458	1542	212	489.5	451.5	513.8	528.2	466.1	8.9352	8.8186	9.0051	9.0449	8.8645	0.85	0.97	0.85	0
Tb927.7.2070	heat shock protein DNAJ, putative	Chaperone	169	378	325	374	32	140	170.7	114.5	128.1	70.4	7.1293	7.4153	6.8392	7.0011	6.1375	1.09	1.99	1.09	0
Tb927.5.1520	heat shock protein HslU1, in mitochondrion	Chaperone	264	516	580	618	135	218.7	233	204.4	211.7	296.8	7.7728	7.8642	7.6753	7.7259	8.2133	1.03	0.74	0.74	0
Tb927.11.12230	heat shock protein HslU2, in mitochondrion	Chaperone	112	237	335	390	36	92.8	107	118	133.6	79.1	6.5361	6.7415	6.8826	7.0618	6.3056	0.69	1.17	0.69	0
Tb927.10.12710	heat shock protein, HSP110	Chaperone	907	1627	3308	3202	451	751.3	734.5	1165.7	1096.8	991.5	9.5532	9.5206	10.187	10.0991	9.9535	0.63	0.74	0.63	0
Tb927.10.5660	heat shock protein, putative	Chaperone	81	139	248	267	37	67.1	62.8	87.4	91.5	81.3	6.0682	5.9727	6.4496	6.5157	6.3452	0.69	0.77	0.69	0
Tb927.3.5340	Hsc70-interacting protein (Hip), putative	Chaperone	275	612	904	785	80	227.8	276.3	318.5	268.9	175.9	7.8316	8.1101	8.3151	8.0709	7.4586	0.72	1.3	0.72	0
Tb927.10.2620	HSP20 cold-shock domain (p23-like)	Chaperone	132	340	484	571	213	109.3	153.5	170.5	195.6	468.3	6.7721	7.2621	7.4136	7.6118	8.8713	0.56	0.23	0.23	0
Tb927.11.16050	HSP20 domain	Chaperone	145	338	493	598	74	120.1	152.6	173.7	204.8	162.7	6.9081	7.2536	7.4405	7.6781	7.3461	0.59	0.74	0.59	0
Tb927.9.13290	HSP20 domain	Chaperone	67	189	250	305	44	55.5	85.3	88.1	104.5	96.7	5.7944	6.4145	6.4611	6.7074	6.5954	0.53	0.57	0.53	0
Tb927.9.10230	HSP20 domain (p23-like)	Chaperone	627	895	1338	1601	186	519.4	404.1	471.5	548.4	408.9	9.0207	8.6586	8.8811	9.0991	8.6756	0.74	0.99	0.74	0
Tb927.9.4500	HSP70, endoplasmatic reticulum, HSP70.a	Chaperone	471	1484	1343	1226	324	390.1	670	473.2	420	712.3	8.6077	9.388	8.8863	8.7142	9.4763	0.82	0.55	0.55	0
Tb927.10.14740	hypothetical protein, conserved, DnaJ domain	Chaperone	363	768	931	1042	127	300.7	346.7	328.1	356.9	279.2	8.2322	8.4375	8.358	8.4794	8.1252	0.84	1.08	0.84	0
Tb927.9.1560	hypothetical protein, conserved, DNAj domain	Chaperone	114	226	431	491	77	94.4	102	151.9	168.2	169.3	6.5607	6.6724	7.247	7.394	7.4034	0.56	0.56	0.56	0
Tb927.11.15480	hypothetical, HSP20-like chaperone	Chaperone	339	405	377	419	56	280.8	182.8	132.8	143.5	123.1	8.1334	7.5141	7.0531	7.1649	6.9437	1.27	1.48	1.27	0
Tb927.10.9420	mitochondrial chaperone BCS1, putative	Chaperone	72	200	232	237	34	59.6	90.3	81.8	81.2	74.7	5.8972	6.4967	6.354	6.3434	6.223	0.73	0.8	0.73	0
Tb927.8.3580	mitochondrial chaperone BCS1, putative	Chaperone	61	143	123	95	29	50.5	64.6	43.3	32.5	63.8	5.6582	6.0135	5.4363	5.0224	5.9955	1.17	0.79	0.79	0
Tb927.9.9780	peptidyl-prolyl cis-trans isomerase (cyclophilin- 40), putative	Chaperone	350	539	823	917	106	289.9	243.3	290	314.1	233	8.1794	7.9266	8.1799	8.2951	7.8642	0.77	1.04	0.77	0
Tb927.3.3100	peptidyl-prolyl cis-trans isomerase NIMA-interacting 4, putative	Chaperone	118	195	335	408	95	97.7	88	118	139.8	208.9	6.6103	6.4594	6.8826	7.1272	7.7067	0.63	0.42	0.42	0
Tb927.7.2480	peptidyl-prolyl cis-trans isomerase, putative (PAR45)	Chaperone	109	261	257	255	30	90.3	117.8	90.6	87.3	66	6.4967	6.8802	6.5014	6.4479	6.0444	1	1.37	1	0
Tb927.10.4620	peptidyl-prolyl cis-trans isomerase, putative (PPIase)	Chaperone	120	203	203	261	70	99.4	91.6	71.5	89.4	153.9	6.6352	6.5173	6.1599	6.4822	7.2658	1.02	0.6	0.6	0
Tb927.8.690	peptidyl-prolyl cis-trans isomerase/rotamase, putative,PPIase, putative (PIN1)	Chaperone	85	142	209	254	44	70.4	64.1	73.6	87	96.7	6.1375	6.0023	6.2016	6.4429	6.5954	0.74	0.66	0.66	0
Tb927.5.580	prefoldin subunit, putative	Chaperone	130	262	316	364	28	107.7	118.3	111.3	124.7	61.6	6.7509	6.8863	6.7983	6.9623	5.9449	0.86	1.75	0.86	0
Tb927.7.570	prefoldin, putative	Chaperone	136	197	686	898	298	112.7	88.9	241.7	307.6	655.2	6.8163	6.4741	7.9171	8.2649	9.3558	0.29	0.14	0.14	0
Tb927.7.2590	prefoldin, putative	Chaperone	112	195	173	179	20	92.8	88	61	61.3	44	6.5361	6.4594	5.9307	5.9378	5.4594	1.44	2	1.44	0
Tb927.7.5790	protein disulfide isomerase, ERp44-like	Chaperone	403	571	1121	1740	166	333.8	257.8	395	596	365	8.3828	8.0101	8.6257	9.2192	8.5118	0.43	0.71	0.43	0
Tb927.10.8230	protein disulfide isomerase,ERp57-like, cofactor wth calnexin, putative	Chaperone	1616	1961	2810	3423	446	1338.6	885.3	990.2	1172.5	980.5	10.3865	9.79	9.9516	10.1954	9.9374	0.76	0.9	0.76	0
Tb927.7.1300	protein disulfide isomerase,ERp72-like, cofactor wth calnexin, putative	Chaperone	571	1077	659	894	58	473	486.2	232.2	306.2	127.5	8.8857	8.9254	7.8592	8.2583	6.9944	1.54	3.71	1.54	0
Tb927.1.3200	SGT1-like protein, putative	Chaperone	210	304	401	434	46	173.9	137.2	141.3	148.7	101.1	7.4421	7.1001	7.1426	7.2163	6.6596	0.92	1.36	0.92	0
Tb927.5.2940	stress-induced protein sti1, putative	Chaperone	439	613	989	1106	106	363.6	276.8	348.5	378.9	233	8.5062	8.1127	8.445	8.5657	7.8642	0.73	1.19	0.73	0
Tb927.10.4450	stress-inducible protein STI1-like, putative	Chaperone	201	400	478	520	66	166.5	180.6	168.4	178.1	145.1	7.3794	7.4967	7.3957	7.4765	7.1809	0.93	1.15	0.93	0
Tb927.7.3630	TPR-repeat-containing chaperone protein DNAJ, putative	Chaperone	182	453	736	829	51	150.8	204.5	259.3	284	112.1	7.2365	7.676	8.0185	8.1497	6.8086	0.53	1.35	0.53	0
Tb927.10.5180	TPR-repeat-containing chaperone protein DNAJ, putative	Chaperone	173	288	467	474	69	143.3	130	164.6	162.4	151.7	7.1629	7.0224	7.3628	7.3434	7.2451	0.79	0.86	0.79	0
Tb927.4.2220	TPR-repeat-containing chaperone protein DNAJ, putative	Chaperone	174	354	430	462	66	144.1	159.8	151.5	158.3	145.1	7.1709	7.3201	7.2432	7.3065	7.1809	0.91	0.99	0.91	0
Tb927.4.880	TPR-repeat-containing chaperone protein DNAJ, putative	Chaperone	87	241	227	228	40	72.1	108.8	80	78.1	87.9	6.1719	6.7655	6.3219	6.2873	6.4578	0.9	0.82	0.82	0
Tb927.10.4900	TPR-repeat-containing chaperone protein DNAJ, putative,TPR repeat protein	Chaperone	311	549	567	618	81	257.6	247.9	199.8	211.7	178.1	8.009	7.9536	7.6424	7.7259	7.4765	1.17	1.39	1.17	0
Tb927.11.16760	Tric complex alpha subunit (TCP-1-alpha)	Chaperone	309	580	743	669	82	256	261.9	261.8	229.2	180.3	8	8.0329	8.0323	7.8405	7.4943	0.98	1.42	0.98	0
Tb927.11.1900	Tric complex beta subunit (TCP-1-beta)	Chaperone	336	655	965	1071	126	278.3	295.7	340	366.9	277	8.1205	8.208	8.4094	8.5192	8.1137	0.76	1	0.76	0
Tb927.10.1060	Tric complex delta subunit (TCP-1-delta)	Chaperone	366	611	806	911	216	303.2	275.8	284	312.1	474.9	8.2441	8.1075	8.1497	8.2859	8.8915	0.88	0.58	0.58	0
Tb927.11.14250	Tric complex epsilon subunit (TCP-1-epsilon)	Chaperone	434	795	635	592	42	359.5	358.9	223.8	202.8	92.3	8.4898	8.4874	7.8061	7.6639	6.5283	1.6	3.89	1.6	0
Tb927.9.11270	Tric complex eta subunit (TCP-1-eta)	Chaperone	463	909	996	1021	145	383.5	410.4	351	349.7	318.8	8.5831	8.6809	8.4553	8.45	8.3165	1.09	1.2	1.09	0
Tb927.8.3150	Tric complex gamma subunit (TCP-1-gamma)	Chaperone	336	468	775	747	132	278.3	211.3	273.1	255.9	290.2	8.1205	7.7231	8.0933	7.9994	8.1809	0.77	0.73	0.73	0
Tb927.10.8190	Tric complex theta subunit (TCP-1-theta)	Chaperone	329	541	699	737	67	272.5	244.2	246.3	252.5	147.3	8.0901	7.9319	7.9443	7.9801	7.2026	0.97	1.66	0.97	0
Tb927.11.3240	Tric complex zeta subunit (TCP-1-zeta)	Chaperone	557	891	858	806	95	461.4	402.3	302.3	276.1	208.9	8.8499	8.6521	8.2398	8.109	7.7067	1.33	1.93	1.33	0
Tb927.8.5890	Anti-silencing function ASF1B	Chromatin	68	133	158	150	17	56.3	60	55.7	51.4	37.4	5.8151	5.9069	5.7996	5.6837	5.225	1.01	1.51	1.01	0
Tb927.1.630	anti-silencing protein ASF1A	Chromatin	71	112	120	170	21	58.8	50.6	42.3	58.2	46.2	5.8777	5.6611	5.4026	5.8629	5.5298	0.87	1.1	0.87	0
Tb927.10.7420	bromodomain factor 2 BDF2	Chromatin	77	131	346	357	50	63.8	59.1	121.9	122.3	109.9	5.9955	5.8851	6.9296	6.9343	6.78	0.48	0.54	0.48	0
Tb927.10.8150	Bromodomain protein BDF1	Chromatin	113	194	202	228	60	93.6	87.6	71.2	78.1	131.9	6.5484	6.4529	6.1538	6.2873	7.0433	1.12	0.66	0.66	0
Tb927.11.10070	Bromodomain protein BDF3	Chromatin	70	207	176	186	21	58	93.5	62	63.7	46.2	5.858	6.5469	5.9542	5.9932	5.5298	0.91	1.26	0.91	0
Tb927.7.4380	Bromodomain protein BDF4	Chromatin	117	254	447	426	50	96.9	114.7	157.5	145.9	109.9	6.5984	6.8417	7.2992	7.1888	6.78	0.62	0.88	0.62	0
Tb927.11.13400	Bromodomain protein BDFx	Chromatin	181	396	634	575	106	149.9	178.8	223.4	197	233	7.2279	7.4822	7.8035	7.6221	7.8642	0.67	0.64	0.64	0
Tb927.10.7050	chromatin assembly factor 1 subunit B, putative	Chromatin	79	164	152	139	28	65.4	74	53.6	47.6	61.6	6.0312	6.2095	5.7442	5.5729	5.9449	1.22	1.06	1.06	0
Tb927.10.7510	chromatin binding protein, putative	Chromatin	85	172	187	176	12	70.4	77.7	65.9	60.3	26.4	6.1375	6.2798	6.0422	5.9141	4.7225	1.07	2.67	1.07	0
Tb927.9.4900	condensin subunit 1, putative	Chromatin	235	366	705	775	79	194.7	165.2	248.4	265.5	173.7	7.6051	7.3681	7.9565	8.0526	7.4405	0.62	0.95	0.62	0
Tb927.6.4820	CPC1, chromosomal passenger complex	Chromatin	82	166	191	248	41	67.9	74.9	67.3	85	90.1	6.0853	6.2269	6.0725	6.4094	6.4935	0.8	0.75	0.75	0
Tb927.11.14840	CPC2, chromosomal passenger complex	Chromatin	232	460	1106	1306	224	192.2	207.7	389.7	447.4	492.5	7.5865	7.6984	8.6062	8.8054	8.944	0.43	0.39	0.39	0
Tb927.8.1920	DOT1A	Chromatin	75	170	227	225	9	62.1	76.7	80	77.1	19.8	5.9565	6.2612	6.3219	6.2687	4.3074	0.78	3.14	0.78	0
Tb927.8.5770	Elongator-like Protein 3a ELP3a	Chromatin	127	266	317	278	61	105.2	120.1	111.7	95.2	134.1	6.717	6.9081	6.8035	6.5729	7.0672	0.94	0.78	0.78	0
Tb927.3.3490	high mobility group protein, putative (TDP1)	Chromatin	533	1018	1106	1311	120	441.5	459.6	389.7	449.1	263.8	8.7863	8.8442	8.6062	8.8109	8.0433	0.98	1.67	0.98	0
Tb927.7.4560	histone acetyltransferase HAT1	Chromatin	161	305	411	338	56	133.4	137.7	144.8	115.8	123.1	7.0596	7.1054	7.1779	6.8555	6.9437	0.92	1.08	0.92	0
Tb927.11.11530	histone acetyltransferase HAT2	Chromatin	109	312	371	330	60	90.3	140.9	130.7	113	131.9	6.4967	7.1385	7.0301	6.8202	7.0433	0.69	0.68	0.68	0
Tb927.10.8310	Histone acetyltransferase HAT3	Chromatin	79	141	218	280	40	65.4	63.7	76.8	95.9	87.9	6.0312	5.9932	6.263	6.5835	6.4578	0.66	0.72	0.66	0
Tb927.10.1680	histone deacetylase 1 (DAC1 or HDAC1)	Chromatin	70	113	245	227	30	58	51	86.3	77.8	66	5.858	5.6724	6.4313	6.2817	6.0444	0.59	0.77	0.59	0
Tb927.11.15600	histone deacetylase 2 (DAC2 or HDAC2)	Chromatin	80	182	248	296	74	66.3	82.2	87.4	101.4	162.7	6.0509	6.3611	6.4496	6.6639	7.3461	0.65	0.41	0.41	0
Tb927.2.2190	histone deacetylase 3 (DAC3 or HDAC3)	Chromatin	107	216	374	386	54	88.6	97.5	131.8	132.2	118.7	6.4692	6.6073	7.0422	7.0466	6.8912	0.67	0.75	0.67	0
Tb927.5.2900	histone deacetylase 4 (DAC4 HDAC4)	Chromatin	47	128	124	142	24	38.9	57.8	43.7	48.6	52.8	5.2817	5.853	5.4496	5.6029	5.7225	0.8	0.74	0.74	0
Tb927.7.2820	histone H2A	Chromatin	2653	7677	4109	2811	1348	2197.6	3465.9	1447.9	962.9	2963.6	11.1017	11.759	10.4997	9.9112	11.5331	1.52	0.74	0.74	0
Tb927.7.6360	histone H2A variant (h2aZ)	Chromatin	180	344	403	483	47	149.1	155.3	142	165.4	103.3	7.2201	7.2789	7.1497	7.3698	6.6907	0.9	1.44	0.9	0
Tb927.11.7350	histone H2B variant (H2BVAR)	Chromatin	171	426	393	410	56	141.6	192.3	138.5	140.4	123.1	7.1457	7.5872	7.1137	7.1334	6.9437	1.01	1.15	1.01	0
Tb927.1.2430	histone H3	Chromatin	4215	6494	9732	7197	1575	3491.4	2931.8	3429.3	2465.3	3462.6	11.7696	11.5176	11.7437	11.2675	11.7576	0.85	0.85	0.85	0
Tb927.10.15350	histone H3 variant (h3vaR)	Chromatin	110	124	255	377	61	91.1	56	89.9	129.1	134.1	6.5094	5.8074	6.4902	7.0123	7.0672	0.43	0.42	0.42	0
Tb927.5.4170	histone H4	Chromatin	2179	3776	2577	2111	440	1804.9	1704.7	908.1	723.1	967.3	10.8177	10.7353	9.8267	9.4981	9.9178	1.88	1.76	1.76	0
Tb927.1.570	Histone-lysine N-methyltransferase, (DOT1B)	Chromatin	97	198	131	136	22	80.3	89.4	46.2	46.6	48.4	6.3273	6.4822	5.5298	5.5423	5.5969	1.72	1.66	1.66	0
Tb927.11.13640	J-binding protein (JBP1)	Chromatin	253	372	695	721	71	209.6	167.9	244.9	247	156.1	7.7115	7.3915	7.936	7.9484	7.2863	0.68	1.08	0.68	0
Tb927.9.5730	nucleosome assembly protein-like protein	Chromatin	291	485	860	1031	70	241	219	303	353.2	153.9	7.9129	7.7748	8.2432	8.4643	7.2658	0.62	1.42	0.62	0
Tb927.10.15180	nucleosome assembly protein, putative	Chromatin	217	416	885	994	239	179.7	187.8	311.9	340.5	525.4	7.4894	7.5531	8.2849	8.4115	9.0373	0.53	0.34	0.34	0
Tb927.10.1440	Pob3	Chromatin	108	256	267	217	56	89.5	115.6	94.1	74.3	123.1	6.4838	6.853	6.5561	6.2153	6.9437	0.95	0.73	0.73	0
Tb927.9.10100	Possible histone methyltransferase: 7 SET domains.	Chromatin	197	265	491	443	50	163.2	119.6	173	151.7	109.9	7.3505	6.9021	7.4346	7.2451	6.78	0.69	1.09	0.69	0
Tb927.11.6780	regulator of chromatin condensation, putative (RCC1)	Chromatin	65	142	135	124	13	53.8	64.1	47.6	42.5	28.6	5.7495	6.0023	5.5729	5.4094	4.8379	1.13	1.88	1.13	0
Tb927.11.370	repressor activator protein 1 (RAP1)	Chromatin	211	380	625	642	115	174.8	171.6	220.2	219.9	252.8	7.4496	7.4229	7.7827	7.7807	7.9819	0.78	0.68	0.68	0
Tb927.7.1690	silent information regulator 2 (SIR2RP1)	Chromatin	82	182	193	177	31	67.9	82.2	68	60.6	68.2	6.0853	6.3611	6.0875	5.9212	6.0917	1	1	1	0
Tb927.9.11850	structural maintenance of chromosome 1 (SMC1)	Chromatin	238	491	779	892	129	197.1	221.7	274.5	305.6	283.6	7.6228	7.7925	8.1007	8.2555	8.1477	0.64	0.69	0.64	0
Tb927.10.10340	structural maintenance of chromosome 2 (SMC2)	Chromatin	324	489	762	831	95	268.4	220.8	268.5	284.7	208.9	8.0682	7.7866	8.0688	8.1533	7.7067	0.78	1.06	0.78	0
Tb927.5.3510	structural maintenance of chromosome 3 (SMC3)	Chromatin	277	452	676	925	142	229.4	204.1	238.2	316.9	312.2	7.8417	7.6731	7.896	8.3079	8.2863	0.64	0.65	0.64	0
Tb927.10.740	structural maintenance of chromosome 4 (SMC4)	Chromatin	277	500	855	979	137	229.4	225.7	301.3	335.4	301.2	7.8417	7.8183	8.2351	8.3897	8.2346	0.67	0.75	0.67	0
Tb927.2.1810	transcription silencer (ISWI)	Chromatin	347	483	910	879	111	287.4	218.1	320.7	301.1	244	8.1669	7.7688	8.3251	8.2341	7.9307	0.68	0.89	0.68	0
Tb927.11.1450	2-oxoglutarate dehydrogenase E1 component, putative	Citric.acid.cycle	637	1304	1165	1128	200	527.6	588.7	410.5	386.4	439.7	9.0433	9.2014	8.6812	8.594	8.7804	1.29	1.2	1.2	0
Tb927.11.9980	2-oxoglutarate dehydrogenase E1 component, putative	Citric.acid.cycle	333	879	956	988	218	275.8	396.8	336.9	338.4	479.3	8.1075	8.6323	8.3962	8.4026	8.9048	0.82	0.58	0.58	0
Tb927.11.11680	2-oxoglutarate dehydrogenase E2 component, putative	Citric.acid.cycle	275	574	499	444	48	227.8	259.1	175.8	152.1	105.5	7.8316	8.0174	7.4578	7.2489	6.7211	1.3	2.16	1.3	0
Tb927.10.14000	aconitase (ACO)	Citric.acid.cycle	110	220	433	412	42	91.1	99.3	152.6	141.1	92.3	6.5094	6.6337	7.2536	7.1406	6.5283	0.6	0.99	0.6	0
Tb927.10.13430	citrate synthase, putative	Citric.acid.cycle	46	146	171	149	18	38.1	65.9	60.3	51	39.6	5.2517	6.0422	5.9141	5.6724	5.3074	0.63	0.96	0.63	0
Tb927.11.16730	dihydrolipoyl dehydrogenase (GCVL-2)	Citric.acid.cycle	302	834	661	685	94	250.2	376.5	232.9	234.6	206.7	7.9669	8.5565	7.8636	7.8741	7.6914	1.07	1.21	1.07	0
Tb927.3.4500	fumarate hydratase, class I (FHc)	Citric.acid.cycle	54	118	164	188	25	44.7	53.3	57.8	64.4	55	5.4822	5.7361	5.853	6.009	5.7814	0.69	0.81	0.69	0
Tb927.11.5050	fumarate hydratase, class I (FHm)	Citric.acid.cycle	90	174	407	421	47	74.5	78.6	143.4	144.2	103.3	6.2192	6.2965	7.1639	7.1719	6.6907	0.52	0.72	0.52	0
Tb927.9.5900	glutamate dehydrogenase (GDH)	Citric.acid.cycle	141	371	818	802	121	116.8	167.5	288.2	274.7	266	6.8679	7.388	8.1709	8.1017	8.0553	0.41	0.44	0.41	0
Tb927.8.3690	isocitrate dehydrogenase [NADP], mitochondrial precursor, putative (IDH)	Citric.acid.cycle	104	230	506	598	74	86.1	103.8	178.3	204.8	162.7	6.4279	6.6977	7.4782	7.6781	7.3461	0.42	0.53	0.42	0
Tb927.11.900	isocitrate dehydrogenase, putative (IDH)	Citric.acid.cycle	199	411	651	618	89	164.8	185.6	229.4	211.7	195.7	7.3646	7.5361	7.8417	7.7259	7.6125	0.72	0.84	0.72	0
Tb927.10.2560	mitochondrial malate dehydrogenase (mMDH)	Citric.acid.cycle	96	347	320	393	61	79.5	156.7	112.8	134.6	134.1	6.3129	7.2919	6.8176	7.0725	7.0672	0.59	0.59	0.59	0
Tb927.10.3650	NADH-dependent fumarate reductase, putative	Citric.acid.cycle	165	292	634	643	87	136.7	131.8	223.4	220.3	191.3	7.0949	7.0422	7.8035	7.7833	7.5797	0.59	0.69	0.59	0
Tb927.11.4780	pyruvate dehydrogenase (lipoamide) kinase, putative	Citric.acid.cycle	113	251	436	468	45	93.6	113.3	153.6	160.3	98.9	6.5484	6.824	7.263	7.3246	6.6279	0.58	0.95	0.58	0
Tb927.10.2350	pyruvate dehydrogenase complex E3 binding protein, putative	Citric.acid.cycle	73	141	218	256	26	60.5	63.7	76.8	87.7	57.2	5.9189	5.9932	6.263	6.4545	5.8379	0.69	1.06	0.69	0
Tb927.10.12700	pyruvate dehydrogenase E1 alpha subunit, putative	Citric.acid.cycle	310	888	869	803	131	256.8	400.9	306.2	275.1	288	8.0045	8.6471	8.2583	8.1038	8.1699	0.84	0.89	0.84	0
Tb927.3.1790	pyruvate dehydrogenase E1 beta subunit, putative	Citric.acid.cycle	100	220	414	432	39	82.8	99.3	145.9	148	85.7	6.3716	6.6337	7.1888	7.2095	6.4212	0.56	0.97	0.56	0
Tb927.10.7410	succinyl-CoA ligase [GDP-forming] beta-chain, putative	Citric.acid.cycle	585	974	896	973	184	484.6	439.7	315.7	333.3	404.5	8.9207	8.7804	8.3024	8.3807	8.66	1.32	1.09	1.09	0
Tb927.3.2230	succinyl-CoA synthetase alpha subunit, putative	Citric.acid.cycle	368	841	721	967	127	304.8	379.7	254.1	331.2	279.2	8.2517	8.5687	7.9893	8.3716	8.1252	0.92	1.09	0.92	0
Tb927.11.2690	succinyl-coA:3-ketoacid-coenzyme A transferase, mitochondrial precursor, putative	Citric.acid.cycle	140	337	539	546	116	116	152.1	189.9	187	255	6.858	7.2489	7.5691	7.5469	7.9944	0.61	0.45	0.45	0
Tb927.10.11800	33 kDa inner dynein arm light chain, axonemal, putative,dynein light chain, putative	Cytoskeleton	84	152	187	212	28	69.6	68.6	65.9	72.6	61.6	6.121	6.1001	6.0422	6.1819	5.9449	0.94	1.11	0.94	0
Tb927.9.8850	actin A	Cytoskeleton	647	1795	1179	1280	151	535.9	810.4	415.4	438.5	332	9.0658	9.6625	8.6984	8.7764	8.375	1.22	1.61	1.22	0
Tb927.10.15800	actin related protein 2, putative	Cytoskeleton	150	215	312	290	51	124.2	97.1	109.9	99.3	112.1	6.9565	6.6014	6.78	6.6337	6.8086	0.88	0.87	0.87	0
Tb927.9.5350	actin related protein 3, putative	Cytoskeleton	78	118	252	241	42	64.6	53.3	88.8	82.6	92.3	6.0135	5.7361	6.4725	6.3681	6.5283	0.6	0.58	0.58	0
Tb927.11.10110	actin-like protein, putative	Cytoskeleton	110	309	300	270	34	91.1	139.5	105.7	92.5	74.7	6.5094	7.1241	6.7238	6.5314	6.223	0.86	1.22	0.86	0
Tb927.10.2000	actin-like protein, putative	Cytoskeleton	106	247	233	272	40	87.8	111.5	82.1	93.2	87.9	6.4561	6.8009	6.3593	6.5423	6.4578	0.94	1	0.94	0
Tb927.3.3020	actin-like protein, putative	Cytoskeleton	59	114	92	86	9	48.9	51.5	32.4	29.5	19.8	5.6118	5.6865	5.0179	4.8826	4.3074	1.51	2.47	1.51	0
Tb927.4.980	actin, putative	Cytoskeleton	105	239	227	194	17	87	107.9	80	66.5	37.4	6.4429	6.7536	6.3219	6.0553	5.225	1.09	2.33	1.09	0
Tb927.9.5440	actin, putative	Cytoskeleton	112	218	197	219	22	92.8	98.4	69.4	75	48.4	6.5361	6.6206	6.1169	6.2288	5.5969	1.24	1.92	1.24	0
Tb927.11.3880	actin, putative (TRYPARP)	Cytoskeleton	98	212	289	228	39	81.2	95.7	101.8	78.1	85.7	6.3434	6.5804	6.6696	6.2873	6.4212	0.8	0.95	0.8	0
Tb927.1.2340	alpha tubulin	Cytoskeleton	11737	18101	11982	9892	768	9722.1	8172	4222.1	3388.5	1688.5	13.2471	12.9965	12.0437	11.7264	10.7215	1.94	4.84	1.94	0
Tb927.3.1400	alpha-tubulin N-acetyltransferase, putative	Cytoskeleton	57	132	203	225	33	47.2	59.6	71.5	77.1	72.6	5.5607	5.8972	6.1599	6.2687	6.1819	0.61	0.65	0.61	0
Tb927.9.13100	ankyrin repeat protein, putative	Cytoskeleton	174	334	134	150	58	144.1	150.8	47.2	51.4	127.5	7.1709	7.2365	5.5607	5.6837	6.9944	2.8	1.13	1.13	0
Tb927.11.12360	ankyrin repeat protein, putative	Cytoskeleton	56	133	117	112	12	46.4	60	41.2	38.4	26.4	5.5361	5.9069	5.3646	5.263	4.7225	1.13	1.76	1.13	0
Tb927.4.1170	ankyrin, putative	Cytoskeleton	116	253	360	424	51	96.1	114.2	126.9	145.2	112.1	6.5865	6.8354	6.9875	7.1819	6.8086	0.66	0.86	0.66	0
Tb927.10.10600	ARP2/3 complex 16kDa subunit, putative	Cytoskeleton	30	57	127	151	34	24.8	25.7	44.8	51.7	74.7	4.6323	4.6837	5.4854	5.6921	6.223	0.48	0.33	0.33	0
Tb927.2.2900	ARP2/3 complex subunit, putative	Cytoskeleton	74	143	235	351	107	61.3	64.6	82.8	120.2	235.2	5.9378	6.0135	6.3716	6.9093	7.8777	0.51	0.26	0.26	0
Tb927.10.13190	ARP2/3 complex subunit, putative	Cytoskeleton	69	154	194	197	17	57.2	69.5	68.4	67.5	37.4	5.8379	6.1189	6.0959	6.0768	5.225	0.84	1.53	0.84	0
Tb927.8.4410	ARP2/3 complex subunit, putative	Cytoskeleton	51	164	144	127	25	42.2	74	50.7	43.5	55	5.3992	6.2095	5.6639	5.4429	5.7814	0.83	0.77	0.77	0
Tb927.10.4540	ARP2/3 complex subunit, putative	Cytoskeleton	30	55	77	89	1	24.8	24.8	27.1	30.5	2.2	4.6323	4.6323	4.7602	4.9307	1.1375	0.81	11.27	0.81	0
Tb927.9.10670	Bardet-Biedl syndrome 1 protein homolog (BBS1-like protein 1), putative	Cytoskeleton	82	202	170	170	38	67.9	91.2	59.9	58.2	83.5	6.0853	6.511	5.9045	5.8629	6.3837	1.13	0.81	0.81	0
Tb927.10.6830	Bardet-Biedl syndrome 4 protein homolog (BBS4-like protein 4), putative	Cytoskeleton	81	175	147	151	11	67.1	79	51.8	51.7	24.2	6.0682	6.3038	5.6949	5.6921	4.5969	1.3	2.77	1.3	0
Tb927.8.6070	basal body component,ML protein (TBBC)	Cytoskeleton	260	412	719	795	92	215.4	186	253.4	272.3	202.3	7.7509	7.5392	7.9853	8.0891	7.6604	0.68	0.92	0.68	0
Tb927.4.3440	BB50	Cytoskeleton	113	173	192	159	19	93.6	78.1	67.7	54.5	41.8	6.5484	6.2873	6.0811	5.7682	5.3854	1.15	1.87	1.15	0
Tb927.1.2330	beta tubulin	Cytoskeleton	13578	19814	16404	13264	1589	11247	8945.4	5780.3	4543.5	3493.4	13.4573	13.1269	12.4969	12.1496	11.7704	1.55	2.56	1.55	0
Tb927.10.14890	C-terminal motor kinesin KIFC1	Cytoskeleton	1147	2166	3263	3434	419	950.1	977.9	1149.8	1176.3	921.2	9.8919	9.9335	10.1672	10.2	9.8474	0.81	1.03	0.81	0
Tb927.11.9110	C-terminal motor kinesin, Kinesin-14B	Cytoskeleton	124	279	465	499	50	102.7	126	163.9	170.9	109.9	6.6823	6.9773	7.3567	7.417	6.78	0.6	0.93	0.6	0
Tb927.10.4170	CAP292 Clathrin-associated protein, resembles yeast myosins, homologue of centrosome-associated protein CEP250	Cytoskeleton	497	640	1210	1240	113	411.7	288.9	426.4	424.8	248.4	8.6854	8.1744	8.7361	8.7306	7.9565	0.68	1.16	0.68	0
Tb927.4.2080	CC2D is a FAZ-ER protein, also present on the basal bodies. CC2D is required for FAZ filament assembly.	Cytoskeleton	397	801	1546	1868	198	328.8	361.6	544.8	639.9	435.3	8.3611	8.4983	9.0896	9.3217	8.7659	0.51	0.76	0.51	0
Tb927.11.15800	CIF1	Cytoskeleton	306	471	630	692	58	253.5	212.6	222	237	127.5	7.9858	7.732	7.7944	7.8887	6.9944	0.9	1.67	0.9	0
Tb927.9.14290	CIF2	Cytoskeleton	145	315	232	183	25	120.1	142.2	81.8	62.7	55	6.9081	7.1518	6.354	5.9704	5.7814	1.47	2.18	1.47	0
Tb927.10.16110	CMF1, possible component of motile flagella	Cytoskeleton	84	175	240	236	26	69.6	79	84.6	80.8	57.2	6.121	6.3038	6.4026	6.3363	5.8379	0.82	1.22	0.82	0
Tb927.7.2790	CMF10, possible component of motile flagella	Cytoskeleton	162	316	390	389	48	134.2	142.7	137.4	133.3	105.5	7.0682	7.1568	7.1022	7.0585	6.7211	0.98	1.27	0.98	0
Tb927.10.9870	CMF12, possible component of motile flagella	Cytoskeleton	143	296	323	330	69	118.5	133.6	113.8	113	151.7	6.8887	7.0618	6.8304	6.8202	7.2451	1.04	0.78	0.78	0
Tb927.10.10090	CMF14, possible component of motile flagella, TbTBC-L	Cytoskeleton	144	279	403	393	61	119.3	126	142	134.6	134.1	6.8985	6.9773	7.1497	7.0725	7.0672	0.84	0.89	0.84	0
Tb927.11.7560	CMF15, T. brucei components of motile flagella (TbCMF15)	Cytoskeleton	148	256	518	504	54	122.6	115.6	182.5	172.6	118.7	6.9378	6.853	7.5118	7.4313	6.8912	0.63	0.97	0.63	0
Tb927.11.1430	CMF2, T. brucei components of motile flagella (TbCMF2)	Cytoskeleton	299	503	825	871	124	247.7	227.1	290.7	298.4	272.6	7.9525	7.8272	8.1834	8.2211	8.0906	0.76	0.83	0.76	0
Tb927.5.2950	CMF3, T. brucei components of motile flagella (TbCMF3)	Cytoskeleton	189	306	434	423	69	156.6	138.1	152.9	144.9	151.7	7.2909	7.1096	7.2564	7.1789	7.2451	0.9	0.91	0.9	0
Tb927.3.4230	CMF33 subtilisin-like serine peptidase	Cytoskeleton	284	692	1067	1025	155	235.2	312.4	376	351.1	340.8	7.8777	8.2873	8.5546	8.4557	8.4128	0.63	0.69	0.63	0
Tb927.10.7690	CMF4, T. brucei components of motile flagella (TbCMF4)	Cytoskeleton	189	351	499	480	54	156.6	158.5	175.8	164.4	118.7	7.2909	7.3083	7.4578	7.3611	6.8912	0.89	1.32	0.89	0
Tb927.2.4810	CMF5, T. brucei components of motile flagella (TbCMF5)	Cytoskeleton	264	593	877	939	126	218.7	267.7	309	321.7	277	7.7728	8.0645	8.2715	8.3296	8.1137	0.68	0.79	0.68	0
Tb927.10.3310	CMF76b, possible component of motile flagella	Cytoskeleton	162	362	784	922	57	134.2	163.4	276.3	315.8	125.3	7.0682	7.3523	8.1101	8.3029	6.9692	0.42	1.07	0.42	0
Tb927.11.10900	CMF9, MENG,flagellar component	Cytoskeleton	231	532	898	1166	128	191.3	240.2	316.4	399.4	281.4	7.5797	7.9081	8.3056	8.6417	8.1365	0.48	0.68	0.48	0
Tb927.3.5180	cofilin/actin depolymerizing factor, putative	Cytoskeleton	292	549	1175	1389	120	241.9	247.9	414	475.8	263.8	7.9183	7.9536	8.6935	8.8942	8.0433	0.51	0.92	0.51	0
Tb927.8.3100	coronin (CRN12)	Cytoskeleton	234	386	375	361	72	193.8	174.3	132.1	123.7	158.3	7.5984	7.4454	7.0455	6.9507	7.3065	1.32	1.1	1.1	0
Tb927.4.560	Cytoplasmic dynein 2 heavy chain (DYNC2H1), putative	Cytoskeleton	1924	1836	2893	3219	852	1593.7	828.9	1019.4	1102.7	1873.1	10.6382	9.6951	9.9935	10.1068	10.8712	0.75	0.44	0.44	0
Tb927.11.10930	delta tubulin,tubulin delta chain (TUBD1)	Cytoskeleton	134	251	173	189	43	111	113.3	61	64.7	94.5	6.7944	6.824	5.9307	6.0157	6.5622	1.72	1.17	1.17	0
Tb927.8.4870	DIGIT, flagellar component	Cytoskeleton	333	656	1014	1240	115	275.8	296.2	357.3	424.8	252.8	8.1075	8.2104	8.481	8.7306	7.9819	0.65	1.09	0.65	0
Tb927.7.820	dynein arm light chain, axonemal, putative	Cytoskeleton	126	221	274	237	31	104.4	99.8	96.6	81.2	68.2	6.706	6.641	6.594	6.3434	6.0917	1.03	1.46	1.03	0
Tb927.10.1130	dynein arm light chain, axonemal, putative	Cytoskeleton	102	262	252	243	38	84.5	118.3	88.8	83.2	83.5	6.4009	6.8863	6.4725	6.3785	6.3837	0.95	1.01	0.95	0
Tb927.11.3250	dynein heavy chain	Cytoskeleton	3175	2605	3671	4432	892	2629.9	1176.1	1293.6	1518.2	1961.1	11.3608	10.1998	10.3372	10.5681	10.9374	0.77	0.6	0.6	0
Tb927.11.11220	dynein heavy chain	Cytoskeleton	1876	1396	2595	2801	630	1553.9	630.3	914.4	959.5	1385.1	10.6017	9.2999	9.8367	9.9061	10.4358	0.66	0.46	0.46	0
Tb927.11.8160	dynein heavy chain	Cytoskeleton	1499	1228	1800	1978	463	1241.7	554.4	634.3	677.6	1017.9	10.2781	9.1148	9.309	9.4043	9.9914	0.82	0.54	0.54	0
Tb927.11.2430	dynein heavy chain DHC1b or DYNC2H2, cytoplasmic type	Cytoskeleton	2041	1859	2687	2962	635	1690.6	839.3	946.8	1014.6	1396	10.7233	9.713	9.8869	9.9867	10.4471	0.83	0.6	0.6	0
Tb927.4.870	dynein heavy chain DNAH10 IAD-1alpha inner arm dynein heavy chain	Cytoskeleton	1679	1046	1957	2112	330	1390.8	472.2	689.6	723.5	725.5	10.4417	8.8833	9.4296	9.4988	9.5028	0.65	0.65	0.65	0
Tb927.8.7840	dynein heavy chain, putative, not a DHC in Wickstead analysis	Cytoskeleton	126	161	318	344	39	104.4	72.7	112.1	117.8	85.7	6.706	6.1839	6.8086	6.8802	6.4212	0.62	0.85	0.62	0
Tb927.2.4060	dynein intermediate chain IC 138	Cytoskeleton	178	290	330	312	68	147.4	130.9	116.3	106.9	149.5	7.2036	7.0323	6.8617	6.7401	7.224	1.13	0.88	0.88	0
Tb927.11.2270	dynein intermediate chain IC140 (IDA7)	Cytoskeleton	154	314	466	502	54	127.6	141.8	164.2	172	118.7	6.9955	7.1477	7.3593	7.4263	6.8912	0.74	1.07	0.74	0
Tb927.11.14300	dynein intermediate chain IC70, putative	Cytoskeleton	243	518	667	669	75	201.3	233.9	235	229.2	164.9	7.6532	7.8697	7.8765	7.8405	7.3654	0.86	1.22	0.86	0
Tb927.11.5000	dynein intermediate chain IC78, putative	Cytoskeleton	191	385	377	363	73	158.2	173.8	132.8	124.3	160.5	7.3056	7.4413	7.0531	6.9577	7.3264	1.19	0.99	0.99	0
Tb927.11.5510	dynein light chain p28, axonemal, putative	Cytoskeleton	93	216	136	172	14	77	97.5	47.9	58.9	30.8	6.2668	6.6073	5.582	5.8802	4.9449	1.31	2.5	1.31	0
Tb927.11.5680	dynein light chain, putative	Cytoskeleton	115	249	370	421	97	95.3	112.4	130.4	144.2	213.3	6.5744	6.8125	7.0268	7.1719	7.7367	0.66	0.45	0.45	0
Tb927.5.4440	dynein light chain, putative	Cytoskeleton	148	240	290	350	85	122.6	108.4	102.2	119.9	186.9	6.9378	6.7602	6.6753	6.9057	7.5461	0.9	0.58	0.58	0
Tb927.10.6670	dynein light chain, putative	Cytoskeleton	158	442	236	243	68	130.9	199.5	83.2	83.2	149.5	7.0323	7.6402	6.3785	6.3785	7.224	1.57	0.88	0.88	0
Tb927.10.4690	dynein light chain, putative	Cytoskeleton	77	178	199	214	15	63.8	80.4	70.1	73.3	33	5.9955	6.3291	6.1313	6.1957	5.0444	0.87	1.93	0.87	0
Tb927.10.15580	dynein light chain, putative	Cytoskeleton	47	89	127	127	22	38.9	40.2	44.8	43.5	48.4	5.2817	5.3291	5.4854	5.4429	5.5969	0.87	0.8	0.8	0
Tb927.10.13110	dynein light chain, putative,dynein light chain 2B, redicted dynein modulator,roadblock/LC7 family member	Cytoskeleton	115	235	185	239	48	95.3	106.1	65.2	81.9	105.5	6.5744	6.7293	6.0268	6.3558	6.7211	1.16	0.9	0.9	0
Tb927.10.13370	dynein light chain, putative,dynein Tctex1 family, putative	Cytoskeleton	160	255	282	304	63	132.5	115.1	99.4	104.1	138.5	7.0498	6.8467	6.6352	6.7018	7.1137	1.11	0.83	0.83	0
Tb927.11.3660	dynein light chain, putative,dynein Tctex1 family, putative	Cytoskeleton	77	156	199	261	76	63.8	70.4	70.1	89.4	167.1	5.9955	6.1375	6.1313	6.4822	7.3846	0.71	0.38	0.38	0
Tb927.10.10320	dynein light chain, putative,dynein Tctex1 family, putative	Cytoskeleton	61	138	105	81	14	50.5	62.3	37	27.7	30.8	5.6582	5.9612	5.2095	4.7918	4.9449	1.36	1.64	1.36	0
Tb927.11.7740	dynein light chain, putative,dynein Tctex2 family, putative	Cytoskeleton	90	203	206	183	35	74.5	91.6	72.6	62.7	76.9	6.2192	6.5173	6.1819	5.9704	6.2649	1.03	0.97	0.97	0
Tb927.9.12820	dynein light chain, putative,dynein Tctex2 family, putative	Cytoskeleton	66	114	125	120	19	54.7	51.5	44	41.1	41.8	5.7735	5.6865	5.4594	5.3611	5.3854	1.17	1.23	1.17	0
Tb927.11.16810	dynein light intermediate chain D1bLIC, putative	Cytoskeleton	120	263	438	383	29	99.4	118.7	154.3	131.2	63.8	6.6352	6.8912	7.2696	7.0356	5.9955	0.64	1.56	0.64	0
Tb927.11.7240	dynein regulatory complex subunit CMF70	Cytoskeleton	285	611	580	663	72	236.1	275.8	204.4	227.1	158.3	7.8833	8.1075	7.6753	7.8272	7.3065	1.04	1.49	1.04	0
Tb927.9.14480	dynein-associated protein, putative	Cytoskeleton	87	158	194	201	21	72.1	71.3	68.4	68.9	46.2	6.1719	6.1558	6.0959	6.1064	5.5298	1.03	1.54	1.03	0
Tb927.10.5960	engulfment and cell motility domain 2, putative	Cytoskeleton	124	241	516	551	76	102.7	108.8	181.8	188.7	167.1	6.6823	6.7655	7.5062	7.56	7.3846	0.54	0.61	0.54	0
Tb927.10.1140	epsilon tubulin (TUBE1)	Cytoskeleton	76	252	284	222	48	63	113.8	100.1	76	105.5	5.9773	6.8304	6.6453	6.2479	6.7211	0.63	0.6	0.6	0
Tb927.11.670	epsinR	Cytoskeleton	294	581	780	621	81	243.5	262.3	274.9	212.7	178.1	7.9278	8.0351	8.1028	7.7327	7.4765	0.89	1.37	0.89	0
Tb927.3.5540	FAP133, Component of the IFT dynein motor	Cytoskeleton	72	185	330	361	53	59.6	83.5	116.3	123.7	116.5	5.8972	6.3837	6.8617	6.9507	6.8642	0.48	0.51	0.48	0
Tb927.8.7070	FAZ15 flagellar attachment zone protein	Cytoskeleton	111	150	148	109	30	91.9	67.7	52.2	37.3	66	6.522	6.0811	5.706	5.2211	6.0444	1.3	1.03	1.03	0
Tb927.10.12920	FAZ18 flagellar attachment zone protein	Cytoskeleton	223	344	440	488	56	184.7	155.3	155	167.2	123.1	7.529	7.2789	7.2761	7.3854	6.9437	0.93	1.26	0.93	0
Tb927.3.3300	FAZ19 flagellar attachment zone protein	Cytoskeleton	344	667	817	852	136	284.9	301.1	287.9	291.8	299	8.1543	8.2341	8.1694	8.1888	8.224	0.98	0.95	0.95	0
Tb927.1.4310	FAZ2 flagellar attachment zone protein	Cytoskeleton	1140	878	1431	1234	240	944.3	396.4	504.2	422.7	527.6	9.8831	8.6308	8.9779	8.7235	9.0433	0.79	0.75	0.75	0
Tb927.11.9290	FAZ20 protein tyrosine kinase, putative	Cytoskeleton	106	168	369	353	64	87.8	75.8	130	120.9	140.7	6.4561	6.2441	7.0224	6.9177	7.1365	0.58	0.54	0.54	0
Tb927.11.12530	FAZ3 flagellar attachment zone protein	Cytoskeleton	204	450	681	618	112	169	203.2	240	211.7	246.2	7.4009	7.6668	7.9069	7.7259	7.9437	0.7	0.69	0.69	0
Tb927.9.10530	FAZ4 flagellar attachment zone protein	Cytoskeleton	204	354	554	628	76	169	159.8	195.2	215.1	167.1	7.4009	7.3201	7.6088	7.7489	7.3846	0.74	0.96	0.74	0
Tb927.10.14320	FAZ9 flagellar attachment zone protein	Cytoskeleton	184	391	492	508	60	152.4	176.5	173.4	174	131.9	7.2517	7.4635	7.438	7.4429	7.0433	0.88	1.16	0.88	0
Tb927.11.16110	FG-GAP repeat protein, putative,intergrin alpha chain protein, putative	Cytoskeleton	236	522	657	621	86	195.5	235.7	231.5	212.7	189.1	7.611	7.8808	7.8549	7.7327	7.563	0.84	1.03	0.84	0
Tb927.7.6460	FG-GAP repeat protein, putative,intergrin alpha chain protein, putative	Cytoskeleton	149	289	553	513	68	123.4	130.5	194.9	175.7	149.5	6.9472	7.0279	7.6066	7.457	7.224	0.63	0.83	0.63	0
Tb927.11.11720	FG-GAP repeat protein, putative,intergrin alpha chain protein, putative	Cytoskeleton	137	352	391	525	46	113.5	158.9	137.8	179.8	101.1	6.8265	7.312	7.1064	7.4902	6.6596	0.63	1.12	0.63	0
Tb927.6.2020	FG-GAP repeat protein, putative,intergrin alpha chain protein, putative	Cytoskeleton	110	227	331	364	43	91.1	102.5	116.6	124.7	94.5	6.5094	6.6795	6.8654	6.9623	6.5622	0.73	0.96	0.73	0
Tb927.1.1340	FG-GAP repeat protein, putative,intergrin alpha chain protein, putative	Cytoskeleton	108	236	300	299	53	89.5	106.5	105.7	102.4	116.5	6.4838	6.7347	6.7238	6.6781	6.8642	0.85	0.77	0.77	0
Tb927.3.3640	FG-GAP repeat protein, putative,intergrin alpha chain protein, putative	Cytoskeleton	87	222	192	182	31	72.1	100.2	67.7	62.3	68.2	6.1719	6.6467	6.0811	5.9612	6.0917	1.06	1.06	1.06	0
Tb927.10.5430	Flagellar C1a complex subunit C1a-32, putative	Cytoskeleton	94	200	180	197	15	77.9	90.3	63.4	67.5	33	6.2836	6.4967	5.9864	6.0768	5.0444	1.15	2.36	1.15	0
Tb927.3.2310	flagellar component,PACRGA	Cytoskeleton	186	367	336	374	57	154.1	165.7	118.4	128.1	125.3	7.2677	7.3724	6.8875	7.0011	6.9692	1.2	1.23	1.2	0
Tb927.10.7290	Flagellar Member 2 (FLAM2)	Cytoskeleton	238	565	787	789	211	197.1	255.1	277.3	270.3	463.9	7.6228	7.9949	8.1153	8.0784	8.8577	0.71	0.42	0.42	0
Tb927.8.7950	Flagellar Member 4 (FLAM4)	Cytoskeleton	340	634	971	1122	201	281.6	286.2	342.2	384.3	441.9	8.1375	8.1609	8.4187	8.5861	8.7876	0.73	0.64	0.64	0
Tb927.9.13440	Flagellar Member 5 (FLAM5)	Cytoskeleton	302	465	676	632	122	250.2	209.9	238.2	216.5	268.2	7.9669	7.7136	7.896	7.7582	8.0672	0.88	0.78	0.78	0
Tb927.3.5020	Flagellar Member 6 (FLAM6)	Cytoskeleton	305	545	698	670	137	252.6	246.1	246	229.5	301.2	7.9807	7.9431	7.9425	7.8424	8.2346	1	0.82	0.82	0
Tb927.8.4050	flagellar membrane protein that interacts with FLA1, similar to FLA3	Cytoskeleton	174	327	315	295	50	144.1	147.6	111	101.1	109.9	7.1709	7.2055	6.7944	6.6596	6.78	1.3	1.31	1.3	0
Tb927.11.5640	Flagellar pocket collar protein	Cytoskeleton	108	176	287	254	66	89.5	79.5	101.1	87	145.1	6.4838	6.3129	6.6596	6.4429	7.1809	0.79	0.55	0.55	0
Tb927.11.12150	flagellar protein essential for flagellar pocket biogenesis (BILBO1)	Cytoskeleton	139	273	533	553	57	115.1	123.3	187.8	189.4	125.3	6.8467	6.946	7.5531	7.5653	6.9692	0.61	0.92	0.61	0
Tb927.1.2670	flagellar protein PF16	Cytoskeleton	214	346	798	749	114	177.3	156.2	281.2	256.6	250.6	7.47	7.2873	8.1355	8.0034	7.9692	0.56	0.62	0.56	0
Tb927.10.13960	flagellar protein PF20	Cytoskeleton	170	327	494	511	94	140.8	147.6	174.1	175	206.7	7.1375	7.2055	7.4438	7.4512	7.6914	0.8	0.68	0.68	0
Tb927.8.4640	flagellar protofilament ribbon protein, putative	Cytoskeleton	214	410	482	548	54	177.3	185.1	169.8	187.7	118.7	7.47	7.5322	7.4077	7.5523	6.8912	0.94	1.49	0.94	0
Tb927.3.3690	flagellar radial spoke protein-like, putative	Cytoskeleton	383	785	563	526	114	317.2	354.4	198.4	180.2	250.6	8.3092	8.4692	7.6323	7.4935	7.9692	1.6	1.27	1.27	0
Tb927.3.1110	flagellar transport protein, putative (PIFTA1)	Cytoskeleton	215	423	708	766	148	178.1	191	249.5	262.4	325.4	7.4765	7.5774	7.9629	8.0356	8.3461	0.68	0.55	0.55	0
Tb927.3.5490	flagellar transport protein, putative (PIFTB2)	Cytoskeleton	192	411	623	784	109	159	185.6	219.5	268.6	239.6	7.3129	7.5361	7.7781	8.0693	7.9045	0.59	0.66	0.59	0
Tb927.3.3000	flagellar transport protein, putative (PIFTC3)	Cytoskeleton	208	362	440	503	63	172.3	163.4	155	172.3	138.5	7.4288	7.3523	7.2761	7.4288	7.1137	0.95	1.18	0.95	0
Tb927.11.6050	Flagellar-associated PapD-like, putative	Cytoskeleton	273	455	674	614	108	226.1	205.4	237.5	210.3	237.4	7.8208	7.6823	7.8918	7.7163	7.8912	0.86	0.87	0.86	0
Tb927.10.8940	Flagellum tageting protein KHARON1	Cytoskeleton	1171	1736	2524	2217	174	970	783.8	889.4	759.4	382.5	9.9218	9.6143	9.7967	9.5687	8.5793	0.88	2.05	0.88	0
Tb927.11.3090	FOR20	Cytoskeleton	78	231	279	280	158	64.6	104.3	98.3	95.9	347.4	6.0135	6.7046	6.6191	6.5835	8.4405	0.66	0.19	0.19	0
Tb927.10.9250	G-actin binding protein, putative, CAP/Srv2p, putative	Cytoskeleton	222	498	401	366	27	183.9	224.8	141.3	125.4	59.4	7.5228	7.8125	7.1426	6.9704	5.8924	1.3	3.1	1.3	0
Tb927.4.2350	G-actin binding protein, putative, twinfilin, putative	Cytoskeleton	68	141	190	191	26	56.3	63.7	67	65.4	57.2	5.8151	5.9932	6.0661	6.0312	5.8379	0.84	0.98	0.84	0
Tb927.6.2400	Gamma tubulin complex subunit GCP4	Cytoskeleton	106	248	257	238	64	87.8	112	90.6	81.5	140.7	6.4561	6.8074	6.5014	6.3487	7.1365	0.97	0.62	0.62	0
Tb927.3.910	gamma-tubulin	Cytoskeleton	105	217	277	363	36	87	98	97.6	124.3	79.1	6.4429	6.6147	6.6088	6.9577	6.3056	0.7	1.1	0.7	0
Tb927.10.9770	gamma-tubulin complex subunit GCP2	Cytoskeleton	118	251	297	340	50	97.7	113.3	104.7	116.5	109.9	6.6103	6.824	6.7101	6.8642	6.78	0.84	0.89	0.84	0
Tb927.11.11340	gamma-tubulin complex subunit GCP3	Cytoskeleton	130	265	291	320	34	107.7	119.6	102.5	109.6	74.7	6.7509	6.9021	6.6795	6.7761	6.223	0.98	1.44	0.98	0
Tb927.6.3150	Hydin,flagellar component	Cytoskeleton	1624	1213	2227	2611	571	1345.2	547.6	784.7	894.4	1255.3	10.3936	9.097	9.616	9.8048	10.2938	0.61	0.44	0.44	0
Tb927.11.11650	hypothetical protein, conserved	Cytoskeleton	172	323	802	832	72	142.5	145.8	282.6	285	158.3	7.1548	7.1878	8.1426	8.1548	7.3065	0.5	0.9	0.5	0
Tb927.11.5750	hypothetical protein, conserved	Cytoskeleton	171	296	672	849	103	141.6	133.6	236.8	290.8	226.4	7.1457	7.0618	7.8875	8.1839	7.8227	0.46	0.59	0.46	0
Tb927.4.2400	hypothetical protein, conserved	Cytoskeleton	176	292	447	412	83	145.8	131.8	157.5	141.1	182.5	7.1878	7.0422	7.2992	7.1406	7.5118	0.84	0.72	0.72	0
Tb927.3.4400	hypothetical protein, conserved, Golgin-like, SMC domain (chromosome-segregatng ATPase), also matches yeast myosin-like	Cytoskeleton	84	130	202	246	23	69.6	58.7	71.2	84.3	50.6	6.121	5.8753	6.1538	6.3975	5.6611	0.7	1.16	0.7	0
Tb927.10.15760	hypothetical protein, conserved, in flagellar proteomes, low homology to d tRNA methyltransferase of s: cerevisiae	Cytoskeleton	406	587	835	833	76	336.3	265	294.2	285.3	167.1	8.3936	8.0498	8.2007	8.1563	7.3846	0.9	1.59	0.9	0
Tb927.7.3740	hypothetical protein, conserved, in flagellum	Cytoskeleton	295	677	1118	1160	155	244.4	305.6	394	397.4	340.8	7.9331	8.2555	8.6221	8.6344	8.4128	0.61	0.72	0.61	0
Tb927.10.450	hypothetical protein, conserved, microtubule binding domains. very K/E rich	Cytoskeleton	639	1219	1018	1359	100	529.3	550.3	358.7	465.5	219.9	9.0479	9.1041	8.4866	8.8626	7.7807	1.14	2.41	1.14	0
Tb927.11.2610	hypothetical protein, conserved, no domains, no yeast or human match	Cytoskeleton	1165	2542	3064	3187	186	965	1147.6	1079.7	1091.7	408.9	9.9144	10.1644	10.0764	10.0924	8.6756	0.88	2.36	0.88	0
Tb927.6.3220	hypothetical protein, conserved, no domains, no yeast or human match	Cytoskeleton	137	188	195	215	47	113.5	84.9	68.7	73.6	103.3	6.8265	6.4077	6.1022	6.2016	6.6907	1.15	0.82	0.82	0
Tb927.6.1730	hypothetical protein, conserved, resembles various yeast myosins	Cytoskeleton	197	371	928	882	108	163.2	167.5	327	302.1	237.4	7.3505	7.388	8.3531	8.2389	7.8912	0.5	0.69	0.5	0
Tb927.10.6790	hypothetical protein, conserved, spindle pole body domain	Cytoskeleton	231	363	546	524	93	191.3	163.9	192.4	179.5	204.5	7.5797	7.3567	7.588	7.4878	7.676	0.85	0.8	0.8	0
Tb927.3.1420	hypothetical protein, conserved, trypanosome-specific, C-terminal Kelch motif	Cytoskeleton	596	631	1052	1038	196	493.7	284.9	370.7	355.6	430.9	8.9475	8.1543	8.5341	8.4741	8.7512	0.77	0.66	0.66	0
Tb927.10.12990	hypothetical protein, conserved,predicted ankyrin repeat family protein	Cytoskeleton	106	277	227	200	28	87.8	125.1	80	68.5	61.6	6.4561	6.9669	6.3219	6.098	5.9449	1.1	1.43	1.1	0
Tb927.1.3250	hypothetical protein, myosin heavy-chain like	Cytoskeleton	308	551	834	827	137	255.1	248.8	293.9	283.3	301.2	7.9949	7.9588	8.1992	8.1462	8.2346	0.85	0.83	0.83	0
Tb927.10.15290	hypothetical protein, tubulin-binding CAP cofactor domain (cytoskeletal)	Cytoskeleton	272	344	624	656	68	225.3	155.3	219.9	224.7	149.5	7.8157	7.2789	7.7807	7.8119	7.224	0.69	1.04	0.69	0
Tb927.8.3250	IAD-1beta inner arm dynein heavy chain	Cytoskeleton	2403	1695	3388	3406	834	1990.5	765.2	1193.8	1166.7	1833.6	10.9589	9.5797	10.2213	10.1882	10.8405	0.64	0.42	0.42	0
Tb927.2.5270	IAD-3 inner arm dynein heavy chain	Cytoskeleton	1821	1618	2713	2867	550	1508.4	730.5	956	982.1	1209.2	10.5588	9.5127	9.9009	9.9397	10.2398	0.74	0.6	0.6	0
Tb927.10.5350	IAD-4 inner arm dynein heavy chain	Cytoskeleton	1289	1103	2182	2454	555	1067.7	498	768.9	840.6	1220.2	10.0603	8.96	9.5867	9.7153	10.2529	0.59	0.41	0.41	0
Tb927.7.920	IAD-5 inner arm dynein heavy chain, clathrin-associated	Cytoskeleton	1478	1393	2148	2538	502	1224.3	628.9	756.9	869.4	1103.6	10.2577	9.2967	9.564	9.7639	10.108	0.72	0.57	0.57	0
Tb927.11.16830	IFT22 (was RABL5) (in UPF1-TAP)	Cytoskeleton	73	163	241	188	45	60.5	73.6	84.9	64.4	98.9	5.9189	6.2016	6.4077	6.009	6.6279	0.71	0.61	0.61	0
Tb927.10.5380	intraflagellar transport protein IFT122	Cytoskeleton	323	579	1108	1275	181	267.5	261.4	390.4	436.7	397.9	8.0634	8.0301	8.6088	8.7705	8.6363	0.6	0.66	0.6	0
Tb927.5.3030	intraflagellar transport protein IFT122B	Cytoskeleton	231	459	608	630	109	191.3	207.2	214.2	215.8	239.6	7.5797	7.6949	7.7428	7.7536	7.9045	0.89	0.8	0.8	0
Tb927.10.14470	intraflagellar transport protein IFT140	Cytoskeleton	485	645	1501	1628	284	401.7	291.2	528.9	557.7	624.4	8.65	8.1859	9.0469	9.1233	9.2863	0.52	0.47	0.47	0
Tb927.10.1170	intraflagellar transport protein IFT172	Cytoskeleton	705	1130	1692	1639	258	584	510.2	596.2	561.4	567.2	9.1898	8.9949	9.2197	9.1329	9.1477	0.86	0.9	0.86	0
Tb927.6.3290	intraflagellar transport protein IFT20	Cytoskeleton	97	147	232	275	17	80.3	66.4	81.8	94.2	37.4	6.3273	6.0531	6.354	6.5577	5.225	0.7	1.78	0.7	0
Tb927.2.4530	intraflagellar transport protein IFT43	Cytoskeleton	93	180	194	202	28	77	81.3	68.4	69.2	61.6	6.2668	6.3452	6.0959	6.1127	5.9449	1.11	1.25	1.11	0
Tb927.6.3100	intraflagellar transport protein IFT46	Cytoskeleton	420	846	845	833	269	347.9	381.9	297.8	285.3	591.4	8.4425	8.5771	8.2182	8.1563	9.208	1.17	0.59	0.59	0
Tb927.10.14980	intraflagellar transport protein IFT52	Cytoskeleton	159	271	575	586	111	131.7	122.3	202.6	200.7	244	7.0411	6.9343	7.6625	7.6489	7.9307	0.6	0.5	0.5	0
Tb927.10.11310	intraflagellar transport protein IFT55/IFT57	Cytoskeleton	341	612	913	992	149	282.5	276.3	321.7	339.8	327.6	8.1421	8.1101	8.3296	8.4085	8.3558	0.81	0.84	0.81	0
Tb927.7.3370	intraflagellar transport protein IFT74	Cytoskeleton	272	591	1224	1407	221	225.3	266.8	431.3	482	485.9	7.8157	8.0596	8.7525	8.9129	8.9245	0.47	0.46	0.46	0
Tb927.10.14990	intraflagellar transport protein IFT80/CHE2	Cytoskeleton	246	495	567	540	107	203.8	223.5	199.8	185	235.2	7.671	7.8041	7.6424	7.5314	7.8777	1.02	0.87	0.87	0
Tb927.10.2640	intraflagellar transport protein IFT81	Cytoskeleton	390	739	797	985	96	323	333.6	280.8	337.4	211.1	8.3354	8.382	8.1334	8.3983	7.7218	0.96	1.53	0.96	0
Tb927.11.1740	intraflagellar transport protein IFT88	Cytoskeleton	252	687	1073	1088	159	208.7	310.2	378.1	372.7	349.6	7.7053	8.2771	8.5626	8.5419	8.4496	0.55	0.6	0.55	0
Tb927.11.2880	KIN-A, kinesin, mitotic spindle	Cytoskeleton	92	205	226	189	42	76.2	92.6	79.6	64.7	92.3	6.2517	6.5329	6.3147	6.0157	6.5283	0.96	0.83	0.83	0
Tb927.7.5040	KIN-B, kinesin, mitotic spindle mid-zone	Cytoskeleton	122	211	367	378	39	101.1	95.3	129.3	129.5	85.7	6.6596	6.5744	7.0146	7.0168	6.4212	0.74	1.11	0.74	0
Tb927.11.10760	KIN-D kinesin, associated with sub-pellicular microtubules, essential	Cytoskeleton	178	372	834	920	88	147.4	167.9	293.9	315.1	193.5	7.2036	7.3915	8.1992	8.2997	7.5962	0.47	0.76	0.47	0
Tb927.6.4390	kinesin	Cytoskeleton	333	657	1198	1184	274	275.8	296.6	422.1	405.6	602.4	8.1075	8.2124	8.7214	8.6639	9.2346	0.65	0.46	0.46	0
Tb927.5.2410	kinesin	Cytoskeleton	436	744	875	998	193	361.2	335.9	308.3	341.9	424.3	8.4967	8.3919	8.2682	8.4174	8.7289	0.98	0.79	0.79	0
Tb927.6.1770	kinesin	Cytoskeleton	275	417	846	849	155	227.8	188.3	298.1	290.8	340.8	7.8316	7.5569	8.2197	8.1839	8.4128	0.63	0.55	0.55	0
Tb927.11.6400	kinesin	Cytoskeleton	280	508	779	747	97	231.9	229.3	274.5	255.9	213.3	7.8574	7.8411	8.1007	7.9994	7.7367	0.84	1.08	0.84	0
Tb927.3.2020	kinesin	Cytoskeleton	127	251	297	330	67	105.2	113.3	104.7	113	147.3	6.717	6.824	6.7101	6.8202	7.2026	0.93	0.71	0.71	0
Tb927.1.1350	kinesin heavy chain, Kinesin-1	Cytoskeleton	145	219	263	337	43	120.1	98.9	92.7	115.4	94.5	6.9081	6.6279	6.5345	6.8505	6.5622	0.86	1.05	0.86	0
Tb927.9.3650	kinesin KIF13-1, depolymerising, spindle regulation	Cytoskeleton	185	362	354	357	41	153.2	163.4	124.7	122.3	90.1	7.2593	7.3523	6.9623	6.9343	6.4935	1.23	1.7	1.23	0
Tb927.8.2630	Kinesin KIN-C. Trypanosome-specific kinesin family 2	Cytoskeleton	192	311	578	677	50	159	140.4	203.7	231.9	109.9	7.3129	7.1334	7.6703	7.8574	6.78	0.61	1.28	0.61	0
Tb927.7.4830	Kinesin-12	Cytoskeleton	107	226	204	213	28	88.6	102	71.9	73	61.6	6.4692	6.6724	6.1679	6.1898	5.9449	1.21	1.44	1.21	0
Tb927.11.2490	Kinesin-3	Cytoskeleton	345	509	1029	1028	206	285.8	229.8	362.6	352.1	452.9	8.1589	7.8442	8.5022	8.4598	8.823	0.63	0.51	0.51	0
Tb927.7.5650	Kinesin-4/10	Cytoskeleton	95	150	234	267	59	78.7	67.7	82.5	91.5	129.7	6.2983	6.0811	6.3663	6.5157	7.019	0.74	0.52	0.52	0
Tb927.11.13920	kinesin-II 85 Kd subunit, family 2	Cytoskeleton	313	613	1125	1379	231	259.3	276.8	396.4	472.4	507.9	8.0185	8.1127	8.6308	8.8839	8.9884	0.55	0.51	0.51	0
Tb927.8.6830	Kinesin-like but poor match	Cytoskeleton	302	407	803	692	121	250.2	183.7	283	237	266	7.9669	7.5212	8.1447	7.8887	8.0553	0.65	0.69	0.65	0
Tb927.6.2880	Kinesin-like but poor match	Cytoskeleton	214	353	714	926	149	177.3	159.4	251.6	317.2	327.6	7.47	7.3165	7.975	8.3092	8.3558	0.5	0.49	0.49	0
Tb927.7.4110	Kinesin-like but poor match	Cytoskeleton	203	377	367	406	81	168.2	170.2	129.3	139.1	178.1	7.394	7.4111	7.0146	7.12	7.4765	1.21	0.94	0.94	0
Tb927.11.12180	kinesin, 4/10 family.	Cytoskeleton	107	212	220	200	56	88.6	95.7	77.5	68.5	123.1	6.4692	6.5804	6.2761	6.098	6.9437	1.14	0.72	0.72	0
Tb927.10.15390	kinesin, clathrin-associated, Trypanosome-specific kinesin family 2	Cytoskeleton	263	334	651	688	116	217.8	150.8	229.4	235.7	255	7.7669	7.2365	7.8417	7.8808	7.9944	0.64	0.59	0.59	0
Tb927.11.5300	kinesin, Kif13-3, predicted centromere-associated	Cytoskeleton	128	228	494	490	40	106	102.9	174.1	167.8	87.9	6.7279	6.6851	7.4438	7.3906	6.4578	0.59	1.17	0.59	0
Tb927.4.2730	Kinesin, kinesin-12	Cytoskeleton	131	313	392	400	56	108.5	141.3	138.1	137	123.1	6.7616	7.1426	7.1096	7.098	6.9437	0.79	0.88	0.79	0
Tb927.3.2040	kinesin, Kinesin-16	Cytoskeleton	143	292	382	393	48	118.5	131.8	134.6	134.6	105.5	6.8887	7.0422	7.0725	7.0725	6.7211	0.88	1.12	0.88	0
Tb927.11.4660	kinesin, MCAK-like KIF13-2, tip of flagellum	Cytoskeleton	122	185	542	553	114	101.1	83.5	191	189.4	250.6	6.6596	6.3837	7.5774	7.5653	7.9692	0.44	0.33	0.33	0
Tb927.11.3280	kinesin, MCAK-like KIF13-5	Cytoskeleton	210	409	682	642	64	173.9	184.7	240.3	219.9	140.7	7.4421	7.529	7.9087	7.7807	7.1365	0.72	1.24	0.72	0
Tb927.5.2090	kinesin, putative	Cytoskeleton	365	637	1428	1648	148	302.3	287.6	503.2	564.5	325.4	8.2398	8.1679	8.975	9.1408	8.3461	0.51	0.88	0.51	0
Tb927.10.12490	kinesin, putative	Cytoskeleton	190	363	826	899	78	157.4	163.9	291.1	307.9	171.5	7.2983	7.3567	8.1854	8.2663	7.4221	0.51	0.92	0.51	0
Tb927.10.12440	kinesin, putative	Cytoskeleton	89	187	193	210	49	73.7	84.4	68	71.9	107.7	6.2036	6.3992	6.0875	6.1679	6.7509	1.03	0.68	0.68	0
Tb927.7.6290	kinesin, putative (TbKIF9A)	Cytoskeleton	134	312	490	441	95	111	140.9	172.7	151.1	208.9	6.7944	7.1385	7.4321	7.2394	7.7067	0.64	0.53	0.53	0
Tb927.7.7260	kinesin, putative (TbKIF9B)	Cytoskeleton	165	278	408	355	60	136.7	125.5	143.8	121.6	131.9	7.0949	6.9715	7.1679	6.926	7.0433	0.87	0.95	0.87	0
Tb927.11.1000	kinetoplastid kinetochore protein 16	Cytoskeleton	89	235	324	281	81	73.7	106.1	114.2	96.3	178.1	6.2036	6.7293	6.8354	6.5895	7.4765	0.65	0.41	0.41	0
Tb927.4.2140	MBO2,flagellar component	Cytoskeleton	230	416	769	761	46	190.5	187.8	271	260.7	101.1	7.5736	7.5531	8.0821	8.0262	6.6596	0.69	1.86	0.69	0
Tb927.9.9870	MCAK-like kinesin, putative	Cytoskeleton	122	209	532	620	98	101.1	94.4	187.5	212.4	215.5	6.6596	6.5607	7.5507	7.7306	7.7515	0.44	0.44	0.44	0
Tb927.9.7720	Member of IFT complex A, tetratricopeptide repeat protein	Cytoskeleton	269	535	811	813	137	222.8	241.5	285.8	278.5	301.2	7.7996	7.9159	8.1589	8.1215	8.2346	0.78	0.74	0.74	0
Tb927.11.16200	microtubule-associated protein,corset-associated protein 17 (CAP17)	Cytoskeleton	111	218	516	625	116	91.9	98.4	181.8	214.1	255	6.522	6.6206	7.5062	7.7421	7.9944	0.43	0.36	0.36	0
Tb927.8.3430	MKS1	Cytoskeleton	78	180	258	238	54	64.6	81.3	90.9	81.5	118.7	6.0135	6.3452	6.5062	6.3487	6.8912	0.71	0.54	0.54	0
Tb927.9.4640	MKS6	Cytoskeleton	203	235	400	409	61	168.2	106.1	140.9	140.1	134.1	7.394	6.7293	7.1385	7.1303	7.0672	0.75	0.79	0.75	0
Tb927.1.1910	MORN repeat-containing protein	Cytoskeleton	151	312	430	421	74	125.1	140.9	151.5	144.2	162.7	6.9669	7.1385	7.2432	7.1719	7.3461	0.83	0.77	0.77	0
Tb927.11.16310	myosin heavy chain, putative, in MCM-BP-TAP	Cytoskeleton	183	272	346	353	44	151.6	122.8	121.9	120.9	96.7	7.2441	6.9402	6.9296	6.9177	6.5954	1.01	1.27	1.01	0
Tb927.10.870	myosin-like	Cytoskeleton	231	444	767	854	82	191.3	200.5	270.3	292.5	180.3	7.5797	7.6475	8.0784	8.1923	7.4943	0.65	1.06	0.65	0
Tb927.6.870	myotubularin, putative	Cytoskeleton	324	474	742	728	169	268.4	214	261.5	249.4	371.5	8.0682	7.7415	8.0307	7.9623	8.5372	0.82	0.58	0.58	0
Tb927.1.3300	myotubularin, putative,zinc-binding phosphatase, putative	Cytoskeleton	184	317	431	486	102	152.4	143.1	151.9	166.5	224.2	7.2517	7.1609	7.247	7.3794	7.8086	0.86	0.64	0.64	0
Tb927.7.4290	Nuclear migration protein NudC (animals), 46% identity	Cytoskeleton	190	266	524	569	65	157.4	120.1	184.6	194.9	142.9	7.2983	6.9081	7.5283	7.6066	7.1589	0.62	0.84	0.62	0
Tb927.3.930	OADalpha outer arm dynein heavy chain	Cytoskeleton	3110	2616	3469	3758	1175	2576.1	1181	1222.4	1287.3	2583.2	11.331	10.2058	10.2555	10.3301	11.3349	0.92	0.46	0.46	0
Tb927.11.16090	outer dynein arm docking complex, DC2	Cytoskeleton	178	328	768	729	72	147.4	148.1	270.6	249.7	158.3	7.2036	7.2104	8.08	7.9641	7.3065	0.54	0.93	0.54	0
Tb927.11.3290	p166, conserved	Cytoskeleton	239	365	660	659	78	198	164.8	232.6	225.7	171.5	7.6294	7.3646	7.8617	7.8183	7.4221	0.71	0.96	0.71	0
Tb927.9.9940	PACRGB,flagellar component	Cytoskeleton	181	271	522	601	151	149.9	122.3	183.9	205.9	332	7.2279	6.9343	7.5228	7.6858	8.375	0.59	0.37	0.37	0
Tb927.3.4290	paraflagellar rod component PFR1	Cytoskeleton	2567	5608	4719	5022	564	2126.3	2531.8	1662.8	1720.3	1240	11.0541	11.3059	10.6994	10.7484	10.2761	1.24	1.71	1.24	0
Tb927.11.13500	paraflagellar rod protein par1	Cytoskeleton	362	619	1235	1184	238	299.9	279.5	435.2	405.6	523.2	8.2283	8.1267	8.7655	8.6639	9.0312	0.64	0.53	0.53	0
Tb927.5.4480	paraflagellar rod protein par4, putative	Cytoskeleton	597	1160	1550	1901	201	494.5	523.7	546.2	651.2	441.9	8.9498	9.0326	9.0933	9.347	8.7876	0.76	1.12	0.76	0
Tb927.8.6660	paraflagellar rod protein PFC1	Cytoskeleton	228	487	503	472	52	188.9	219.9	177.2	161.7	114.3	7.5615	7.7807	7.4692	7.3372	6.8367	1.07	1.65	1.07	0
Tb927.2.3660	paraflagellar rod protein PFC10	Cytoskeleton	758	737	1681	1575	369	627.9	332.7	592.3	539.5	811.2	9.2944	8.3781	9.2102	9.0755	9.6639	0.56	0.41	0.41	0
Tb927.2.2160	paraflagellar rod protein PFC11	Cytoskeleton	108	308	410	469	86	89.5	139.1	144.5	160.7	189.1	6.4838	7.12	7.1749	7.3282	7.563	0.56	0.47	0.47	0
Tb927.11.4740	paraflagellar rod protein PFC12	Cytoskeleton	131	414	574	597	59	108.5	186.9	202.3	204.5	129.7	6.7616	7.5461	7.6604	7.676	7.019	0.53	0.84	0.53	0
Tb927.2.950	paraflagellar rod protein PFC13	Cytoskeleton	2471	3098	5600	7384	608	2046.8	1398.7	1973.3	2529.4	1336.7	10.9992	10.4499	10.9464	11.3046	10.3845	0.55	1.05	0.55	0
Tb927.10.9570	paraflagellar rod protein PFC14	Cytoskeleton	439	808	2163	2649	430	363.6	364.8	762.2	907.4	945.4	8.5062	8.511	9.574	9.8256	9.8848	0.4	0.38	0.38	0
Tb927.10.15250	paraflagellar rod protein PFC15	Cytoskeleton	269	643	867	1037	165	222.8	290.3	305.5	355.2	362.8	7.7996	8.1814	8.255	8.4725	8.503	0.63	0.61	0.61	0
Tb927.10.11300	paraflagellar rod protein PFC16	Cytoskeleton	939	1600	961	1348	224	777.8	722.4	338.6	461.8	492.5	9.6033	9.4967	8.4034	8.8511	8.944	1.56	1.47	1.47	0
Tb927.11.11210	paraflagellar rod protein PFC17	Cytoskeleton	171	341	490	535	80	141.6	154	172.7	183.3	175.9	7.1457	7.2668	7.4321	7.5181	7.4586	0.77	0.81	0.77	0
Tb927.10.8930	paraflagellar rod protein PFC18	Cytoskeleton	201	392	474	555	63	166.5	177	167	190.1	138.5	7.3794	7.4676	7.3837	7.5706	7.1137	0.88	1.2	0.88	0
Tb927.10.10140	paraflagellar rod protein PFC19	Cytoskeleton	462	843	840	905	160	382.7	380.6	296	310	351.8	8.5801	8.5721	8.2095	8.2761	8.4586	1.23	1.08	1.08	0
Tb927.8.3790	paraflagellar rod protein PFC2	Cytoskeleton	114	210	162	140	22	94.4	94.8	57.1	48	48.4	6.5607	6.5668	5.8354	5.585	5.5969	1.65	1.95	1.65	0
Tb927.10.13330	paraflagellar rod protein PFC20	Cytoskeleton	181	326	602	608	66	149.9	147.2	212.1	208.3	145.1	7.2279	7.2016	7.7286	7.7025	7.1809	0.69	1.01	0.69	0
Tb927.8.1550	paraflagellar rod protein PFC3	Cytoskeleton	350	575	1090	1082	186	289.9	259.6	384.1	370.6	408.9	8.1794	8.0201	8.5853	8.5337	8.6756	0.68	0.63	0.63	0
Tb927.6.4140	paraflagellar rod protein PFC4	Cytoskeleton	480	490	461	582	68	397.6	221.2	162.4	199.4	149.5	8.6352	7.7892	7.3434	7.6395	7.224	1.11	1.48	1.11	0
Tb927.7.1920	paraflagellar rod protein PFC5	Cytoskeleton	117	217	278	340	40	96.9	98	98	116.5	87.9	6.5984	6.6147	6.6147	6.8642	6.4578	0.83	1.1	0.83	0
Tb927.3.3770	paraflagellar rod protein PFC6	Cytoskeleton	258	675	579	455	66	213.7	304.7	204	155.9	145.1	7.7394	8.2512	7.6724	7.2845	7.1809	1.05	1.47	1.05	0
Tb927.3.3750	paraflagellar rod protein PFC7	Cytoskeleton	204	357	694	813	130	169	161.2	244.5	278.5	285.8	7.4009	7.3327	7.9337	8.1215	8.1589	0.58	0.56	0.56	0
Tb927.6.3670	paraflagellar rod protein PFC8	Cytoskeleton	813	794	1492	1697	285	673.4	358.5	525.7	581.3	626.6	9.3953	8.4858	9.0381	9.1831	9.2914	0.62	0.57	0.57	0
Tb927.11.14880	paraflagellar rod protein PFC9	Cytoskeleton	253	495	840	770	83	209.6	223.5	296	263.8	182.5	7.7115	7.8041	8.2095	8.0433	7.5118	0.71	1.15	0.71	0
Tb927.8.4970	paraflagellar rod protein PFR2	Cytoskeleton	1862	3730	4101	3887	421	1542.3	1684	1445.1	1331.5	925.6	10.5909	10.7177	10.497	10.3788	9.8542	1.07	1.67	1.07	0
Tb927.2.4330	paraflagellar rod protein PFR5	Cytoskeleton	143	248	417	506	66	118.5	112	146.9	173.3	145.1	6.8887	6.8074	7.1987	7.4371	7.1809	0.65	0.77	0.65	0
Tb927.7.6970	paraflagellar rod protein, putative	Cytoskeleton	176	295	487	525	32	145.8	133.2	171.6	179.8	70.4	7.1878	7.0575	7.4229	7.4902	6.1375	0.74	1.89	0.74	0
Tb927.10.11080	paraflagellar rod protein,I17 antigen	Cytoskeleton	1469	2075	436	796	186	1216.8	936.8	153.6	272.7	408.9	10.2489	9.8716	7.263	8.0912	8.6756	3.44	2.29	2.29	0
Tb927.3.5310	paraflagellar rod protein,I2 antigen	Cytoskeleton	2806	3155	4647	5780	486	2324.3	1424.4	1637.5	1979.9	1068.5	11.1826	10.4761	10.6773	10.9512	10.0614	0.72	1.33	0.72	0
Tb927.11.260	PIFTF6 ,predicted WD40 repeat	Cytoskeleton	203	455	641	723	65	168.2	205.4	225.9	247.7	142.9	7.394	7.6823	7.8195	7.9525	7.1589	0.68	1.18	0.68	0
Tb927.11.320	Potential LC8 homologue (dynein light chain associated to multiple functions in other species such as flagellum beating and formation)	Cytoskeleton	72	135	131	141	34	59.6	60.9	46.2	48.3	74.7	5.8972	5.9284	5.5298	5.594	6.223	1.23	0.8	0.8	0
Tb927.11.13780	profilin	Cytoskeleton	196	531	433	539	83	162.4	239.7	152.6	184.6	182.5	7.3434	7.9051	7.2536	7.5283	7.5118	0.88	0.89	0.88	0
Tb927.3.2890	radial spoke protein RSP10, putative	Cytoskeleton	249	456	953	1184	98	206.3	205.9	335.8	405.6	215.5	7.6886	7.6858	8.3915	8.6639	7.7515	0.51	0.96	0.51	0
Tb927.5.2850	radial spoke protein RSP2, putative	Cytoskeleton	288	750	869	884	136	238.6	338.6	306.2	302.8	299	7.8985	8.4034	8.2583	8.2422	8.224	0.78	0.8	0.78	0
Tb927.11.1150	radial spoke protein RSP3, putative	Cytoskeleton	114	204	475	538	130	94.4	92.1	167.4	184.3	285.8	6.5607	6.5251	7.3872	7.5259	8.1589	0.5	0.32	0.32	0
Tb927.11.4480	radial spoke protein RSP4/6, putative	Cytoskeleton	363	746	664	690	63	300.7	336.8	234	236.4	138.5	8.2322	8.3957	7.8704	7.8851	7.1137	1.27	2.17	1.27	0
Tb927.8.810	radial spoke protein RSP9, putative	Cytoskeleton	102	202	426	408	144	84.5	91.2	150.1	139.8	316.6	6.4009	6.511	7.2298	7.1272	8.3065	0.56	0.27	0.27	0
Tb927.10.14010	RP2 basal body protein, required for axoneme formation	Cytoskeleton	187	443	498	502	76	154.9	200	175.5	172	167.1	7.2752	7.6439	7.4553	7.4263	7.3846	0.88	0.93	0.88	0
Tb927.11.3300	SAS4	Cytoskeleton	401	383	890	773	104	332.2	172.9	313.6	264.8	228.6	8.3759	7.4338	8.2928	8.0488	7.8367	0.55	0.76	0.55	0
Tb927.9.10550	SAS6 centriole cartwheel protein	Cytoskeleton	124	184	270	302	64	102.7	83.1	95.1	103.4	140.7	6.6823	6.3768	6.5714	6.6921	7.1365	0.8	0.59	0.59	0
Tb927.10.14110	Sjogren's syndrome autoantigen NA14 (human) and DIP13 (Chlamydomonas)	Cytoskeleton	52	153	94	92	24	43.1	69.1	33.1	31.5	52.8	5.4296	6.1106	5.0488	4.9773	5.7225	1.3	0.82	0.82	0
Tb927.4.3130	Spef1, flagellar component	Cytoskeleton	77	202	283	359	47	63.8	91.2	99.7	123	103.3	5.9955	6.511	6.6395	6.9425	6.6907	0.52	0.62	0.52	0
Tb927.11.3360	T. brucei components of motile flagella (TbCMF22) OADbeta outer arm dynein heavy chain, not a DHC in Wickstead analysis	Cytoskeleton	163	470	725	752	119	135	212.2	255.5	257.6	261.6	7.0768	7.7293	7.9972	8.009	8.0312	0.52	0.52	0.52	0
Tb927.9.10370	TAX-1, flagellar protein	Cytoskeleton	185	322	410	395	102	153.2	145.4	144.5	135.3	224.2	7.2593	7.1839	7.1749	7.08	7.8086	1.01	0.65	0.65	0
Tb927.10.650	TAX-2, flagellar protein	Cytoskeleton	87	131	330	318	50	72.1	59.1	116.3	108.9	109.9	6.1719	5.8851	6.8617	6.7669	6.78	0.51	0.54	0.51	0
Tb927.11.15100	Tb5.20 cytoskeletal protein	Cytoskeleton	1613	3194	5003	5100	206	1336.1	1442	1762.9	1747	452.9	10.3838	10.4939	10.7837	10.7707	8.823	0.76	2.95	0.76	0
Tb927.11.2440	TBCCD1, bilobe, centrioles, cell body anterior	Cytoskeleton	72	137	206	222	34	59.6	61.9	72.6	76	74.7	5.8972	5.9519	6.1819	6.2479	6.223	0.78	0.8	0.78	0
Tb927.8.6240	TbSAXO microtubule stabilizing	Cytoskeleton	215	336	841	713	61	178.1	151.7	296.3	244.2	134.1	7.4765	7.2451	8.2109	7.9319	7.0672	0.51	1.13	0.51	0
Tb927.11.13230	TbVAP, flagellar attachment zone	Cytoskeleton	97	149	506	542	80	80.3	67.3	178.3	185.7	175.9	6.3273	6.0725	7.4782	7.5368	7.4586	0.36	0.38	0.36	0
Tb927.10.6350	trypanin	Cytoskeleton	237	396	896	1151	146	196.3	178.8	315.7	394.3	321	7.6169	7.4822	8.3024	8.6231	8.3264	0.45	0.56	0.45	0
Tb927.9.15050	trypanin-related protein, putative	Cytoskeleton	263	461	694	692	77	217.8	208.1	244.5	237	169.3	7.7669	7.7011	7.9337	7.8887	7.4034	0.85	1.23	0.85	0
Tb927.8.4840	Trypanosome-specific kinesin family 1	Cytoskeleton	173	375	669	714	114	143.3	169.3	235.7	244.6	250.6	7.1629	7.4034	7.8808	7.9343	7.9692	0.59	0.57	0.57	0
Tb927.9.15470	Trypanosome-specific kinesin family 1	Cytoskeleton	194	299	604	562	53	160.7	135	212.8	192.5	116.5	7.3282	7.0768	7.7334	7.5887	6.8642	0.63	1.16	0.63	0
Tb927.7.3000	Trypanosome-specific kinesin family 2	Cytoskeleton	278	397	906	914	126	230.3	179.2	319.3	313.1	277	7.8474	7.4854	8.3188	8.2905	8.1137	0.56	0.65	0.56	0
Tb927.10.15400	Trypanosome-specific kinesin family 2	Cytoskeleton	295	449	842	975	162	244.4	202.7	296.7	334	356.2	7.9331	7.6632	8.2129	8.3837	8.4765	0.61	0.57	0.57	0
Tb927.3.4960	Trypanosome-specific kinesin family 2	Cytoskeleton	423	531	717	729	80	350.4	239.7	252.7	249.7	175.9	8.4529	7.9051	7.9813	7.9641	7.4586	0.95	1.36	0.95	0
Tb927.10.1110	Trypanosome-specific kinesin family 2	Cytoskeleton	237	232	463	411	130	196.3	104.7	163.1	140.8	285.8	7.6169	6.7101	7.3496	7.1375	8.1589	0.64	0.37	0.37	0
Tb927.11.16150	tubulin binding cofactor A, putative	Cytoskeleton	143	224	390	508	70	118.5	101.1	137.4	174	153.9	6.8887	6.6596	7.1022	7.4429	7.2658	0.58	0.66	0.58	0
Tb927.8.6200	tubulin folding cofactor D, putative	Cytoskeleton	192	374	635	714	216	159	168.8	223.8	244.6	474.9	7.3129	7.3992	7.8061	7.9343	8.8915	0.65	0.33	0.33	0
Tb927.9.9580	tubulin tyrosine ligase protein, putative	Cytoskeleton	142	211	444	431	38	117.6	95.3	156.5	147.6	83.5	6.8777	6.5744	7.29	7.2055	6.3837	0.61	1.14	0.61	0
Tb927.10.13870	tubulin tyrosine ligase protein, putative	Cytoskeleton	127	313	279	300	57	105.2	141.3	98.3	102.8	125.3	6.717	7.1426	6.6191	6.6837	6.9692	1.02	0.84	0.84	0
Tb927.5.3860	tubulin tyrosine ligase, putative	Cytoskeleton	65	145	1781	1926	13	53.8	65.5	627.6	659.7	28.6	5.7495	6.0334	9.2937	9.3657	4.8379	0.08	1.88	0.08	0
Tb927.10.13950	tubulin-specific chaperone, putative	Cytoskeleton	122	198	430	468	32	101.1	89.4	151.5	160.3	70.4	6.6596	6.4822	7.2432	7.3246	6.1375	0.56	1.27	0.56	0
Tb927.6.3570	tubulin-tyrosine ligase-like protein, conserved	Cytoskeleton	88	192	266	326	26	72.9	86.7	93.7	111.7	57.2	6.1878	6.438	6.55	6.8035	5.8379	0.65	1.27	0.65	0
Tb927.1.1550	tubulin-tyrosine ligase, putative	Cytoskeleton	121	233	340	333	95	100.2	105.2	119.8	114.1	208.9	6.6467	6.717	6.9045	6.8342	7.7067	0.84	0.48	0.48	0
Tb927.2.5250	tubulin-tyrosine ligase, putative	Cytoskeleton	164	323	230	214	26	135.8	145.8	81	73.3	57.2	7.0853	7.1878	6.3399	6.1957	5.8379	1.68	2.37	1.68	0
Tb927.11.6810	tubulin-tyrsoine ligase-like protein, putative (TTL)	Cytoskeleton	163	277	470	393	44	135	125.1	165.6	134.6	96.7	7.0768	6.9669	7.3716	7.0725	6.5954	0.76	1.29	0.76	0
Tb927.1.1540	Tubulin/FtsZ family, putative	Cytoskeleton	87	218	259	275	51	72.1	98.4	91.3	94.2	112.1	6.1719	6.6206	6.5125	6.5577	6.8086	0.77	0.64	0.64	0
Tb927.4.3390	tuzin, putative	Cytoskeleton	124	282	299	265	44	102.7	127.3	105.4	90.8	96.7	6.6823	6.9921	6.7197	6.5046	6.5954	0.97	1.06	0.97	0
Tb927.2.4580	UNC119 (unc119)	Cytoskeleton	85	147	670	724	121	70.4	66.4	236.1	248	266	6.1375	6.0531	7.8833	7.9542	8.0553	0.27	0.25	0.25	0
Tb927.6.3090	XMAP215, matches microtubule-associated proteins	Cytoskeleton	356	448	733	773	115	294.9	202.3	258.3	264.8	252.8	8.2041	7.6604	8.0129	8.0488	7.9819	0.76	0.8	0.76	0
Tb927.10.14520	YFP-fusion localizes to basal bodies	Cytoskeleton	160	268	369	311	60	132.5	121	130	106.5	131.9	7.0498	6.9189	7.0224	6.7347	7.0433	0.93	0.92	0.92	0
Tb927.1.1150	zeta tubulin	Cytoskeleton	68	171	235	183	25	56.3	77.2	82.8	62.7	55	5.8151	6.2705	6.3716	5.9704	5.7814	0.68	1.02	0.68	0
Tb927.4.2480	8-oxoguanine DNA glycosylase, putative	DNA	57	161	125	102	13	47.2	72.7	44	34.9	28.6	5.5607	6.1839	5.4594	5.1252	4.8379	1.07	1.65	1.07	0
Tb927.11.11440	A/G-specific adenine glycosylase, putative	DNA	68	160	349	371	31	56.3	72.2	123	127.1	68.2	5.8151	6.1739	6.9425	6.9898	6.0917	0.44	0.83	0.44	0
Tb927.4.460	Alkylated DNA repair protein (alkB homolog), putative	DNA	88	168	176	203	13	72.9	75.8	62	69.5	28.6	6.1878	6.2441	5.9542	6.1189	4.8379	1.05	2.55	1.05	0
Tb927.8.5510	apurinic/apyrimidinic endonuclease, putative	DNA	92	202	467	446	66	76.2	91.2	164.6	152.8	145.1	6.2517	6.511	7.3628	7.2555	7.1809	0.46	0.53	0.46	0
Tb927.7.2970	ATP-dependent DEAD/H RNA helicase, putative Mph1, DNA repair?	DNA	117	316	549	576	81	96.9	142.7	193.5	197.3	178.1	6.5984	7.1568	7.5962	7.6242	7.4765	0.49	0.54	0.49	0
Tb927.11.12600	ATP-dependent DNA helicase, putative Srs2 homologue, DNA repair	DNA	214	448	627	664	114	177.3	202.3	220.9	227.5	250.6	7.47	7.6604	7.7872	7.8297	7.9692	0.78	0.71	0.71	0
Tb927.3.1360	cytosine-specific DNA methylase, putative	DNA	98	228	156	172	48	81.2	102.9	55	58.9	105.5	6.3434	6.6851	5.7814	5.8802	6.7211	1.38	0.77	0.77	0
Tb927.6.5110	Damage-specific DNA binding protein, putative	DNA	152	374	459	483	75	125.9	168.8	161.7	165.4	164.9	6.9761	7.3992	7.3372	7.3698	7.3654	0.76	0.76	0.76	0
Tb927.10.11100	deoxyribodipyrimidine photolyase, putative,DNA repair enzyme, putative	DNA	103	163	290	245	24	85.3	73.6	102.2	83.9	52.8	6.4145	6.2016	6.6753	6.3906	5.7225	0.72	1.39	0.72	0
Tb927.10.4480	DNA damage repair protein, putative	DNA	104	265	340	261	27	86.1	119.6	119.8	89.4	59.4	6.4279	6.9021	6.9045	6.4822	5.8924	0.72	1.45	0.72	0
Tb927.7.4080	DNA excision repair protein CSB	DNA	140	358	543	484	33	116	161.6	191.3	165.8	72.6	6.858	7.3363	7.5797	7.3733	6.1819	0.61	1.6	0.61	0
Tb927.6.4780	DNA ligase I, putative	DNA	197	402	453	453	73	163.2	181.5	159.6	155.2	160.5	7.3505	7.5038	7.3183	7.278	7.3264	1.02	1.02	1.02	0
Tb927.11.6750	DNA ligase, putative	DNA	58	82	141	137	13	48	37	49.7	46.9	28.6	5.585	5.2095	5.6352	5.5515	4.8379	0.74	1.29	0.74	0
Tb927.7.610	DNA ligase, putative,mitochondrial DNA ligase homolog, putative	DNA	189	420	766	823	123	156.6	189.6	269.9	281.9	270.4	7.2909	7.5668	8.0763	8.139	8.079	0.56	0.58	0.56	0
Tb927.7.600	DNA ligase, putative,mitochondrial DNA ligase homolog, putative	DNA	95	163	293	351	43	78.7	73.6	103.2	120.2	94.5	6.2983	6.2016	6.6893	6.9093	6.5622	0.61	0.78	0.61	0
Tb927.10.11020	DNA mismatch repair protein, putative,MSH2 (MSH2)	DNA	146	289	330	275	48	120.9	130.5	116.3	94.2	105.5	6.9177	7.0279	6.8617	6.5577	6.7211	1.04	1.15	1.04	0
Tb927.11.12350	DNA photolyase, putative	DNA	101	233	169	126	23	83.7	105.2	59.6	43.2	50.6	6.3872	6.717	5.8972	5.433	5.6611	1.4	1.65	1.4	0
Tb927.8.4880	DNA polymerase alpha catalytic subunit,DNA polymerase I	DNA	201	417	596	725	87	166.5	188.3	210	248.3	191.3	7.3794	7.5569	7.7142	7.9559	7.5797	0.67	0.87	0.67	0
Tb927.2.1800	DNA polymerase delta catalytic subunit, putative (27H14.40)	DNA	229	376	468	538	86	189.7	169.8	164.9	184.3	189.1	7.5676	7.4077	7.3654	7.5259	7.563	0.92	0.9	0.9	0
Tb927.3.1130	DNA polymerase delta subunit 2, putative	DNA	76	177	233	229	19	63	79.9	82.1	78.4	41.8	5.9773	6.3201	6.3593	6.2928	5.3854	0.77	1.51	0.77	0
Tb927.9.10440	DNA polymerase epsilon catalytic subunit, putative	DNA	416	467	841	857	259	344.6	210.8	296.3	293.6	569.4	8.4288	7.7197	8.2109	8.1977	9.1533	0.71	0.37	0.37	0
Tb927.9.15030	DNA polymerase epsilon subunit b, putative	DNA	88	192	189	168	30	72.9	86.7	66.6	57.5	66	6.1878	6.438	6.0575	5.8455	6.0444	1.09	1.1	1.09	0
Tb927.10.1710	DNA polymerase eta, putative	DNA	105	199	267	325	60	87	89.8	94.1	111.3	131.9	6.4429	6.4886	6.5561	6.7983	7.0433	0.78	0.66	0.66	0
Tb927.8.3350	DNA polymerase theta (helicase domain only), putative	DNA	119	181	360	298	54	98.6	81.7	126.9	102.1	118.7	6.6235	6.3523	6.9875	6.6738	6.8912	0.64	0.69	0.64	0
Tb927.11.5550	DNA polymerase theta, putative	DNA	155	274	456	383	48	128.4	123.7	160.7	131.2	105.5	7.0045	6.9507	7.3282	7.0356	6.7211	0.77	1.17	0.77	0
Tb927.8.3290	DNA polymerase zeta catalytic subunit, putative	DNA	297	421	721	665	156	246	190.1	254.1	227.8	343	7.9425	7.5706	7.9893	7.8316	8.4221	0.75	0.55	0.55	0
Tb927.10.3110	DNA primase large subunit, putative	DNA	91	149	202	156	17	75.4	67.3	71.2	53.4	37.4	6.2365	6.0725	6.1538	5.7388	5.225	0.95	1.8	0.95	0
Tb927.7.2310	DNA primase small subunit, putative	DNA	91	157	264	256	48	75.4	70.9	93	87.7	105.5	6.2365	6.1477	6.5392	6.4545	6.7211	0.76	0.67	0.67	0
Tb927.11.5430	DNA repair and recombination protein RAD54, putative	DNA	253	344	419	517	70	209.6	155.3	147.6	177.1	153.9	7.7115	7.2789	7.2055	7.4684	7.2658	0.88	1.01	0.88	0
Tb927.10.3550	DNA repair helicase, putative	DNA	113	191	282	242	29	93.6	86.2	99.4	82.9	63.8	6.5484	6.4296	6.6352	6.3733	5.9955	0.87	1.35	0.87	0
Tb927.7.2060	DNA repair protein ERCC1, putative	DNA	66	94	147	148	22	54.7	42.4	51.8	50.7	48.4	5.7735	5.406	5.6949	5.6639	5.5969	0.82	0.88	0.82	0
Tb927.5.3670	DNA repair protein XPF, putative	DNA	258	508	507	495	112	213.7	229.3	178.7	169.6	246.2	7.7394	7.8411	7.4814	7.406	7.9437	1.2	0.87	0.87	0
Tb927.9.11760	DNA repair protein XPG, RAD2, putative	DNA	95	216	170	227	39	78.7	97.5	59.9	77.8	85.7	6.2983	6.6073	5.9045	6.2817	6.4212	1.01	0.92	0.92	0
Tb927.11.750	DNA repair protein, putative	DNA	251	473	1045	1287	114	207.9	213.5	368.2	440.9	250.6	7.6997	7.7381	8.5243	8.7843	7.9692	0.47	0.83	0.47	0
Tb927.11.8010	DNA repair protein, putative	DNA	148	172	486	551	64	122.6	77.7	171.3	188.7	140.7	6.9378	6.2798	7.4204	7.56	7.1365	0.41	0.55	0.41	0
Tb927.8.6740	DNA repair protein, putative	DNA	155	364	397	409	45	128.4	164.3	139.9	140.1	98.9	7.0045	7.3602	7.1283	7.1303	6.6279	0.92	1.3	0.92	0
Tb927.3.5230	DNA repair protein, putative	DNA	53	160	135	118	16	43.9	72.2	47.6	40.4	35.2	5.4561	6.1739	5.5729	5.3363	5.1375	0.92	1.25	0.92	0
Tb927.3.4810	DNA replication complex GINS protein SLD5, putative	DNA	63	144	169	190	14	52.2	65	59.6	65.1	30.8	5.706	6.0224	5.8972	6.0246	4.9449	0.8	1.69	0.8	0
Tb927.11.7860	DNA replication licensing factor MCM2	DNA	154	260	435	467	85	127.6	117.4	153.3	160	186.9	6.9955	6.8753	7.2602	7.3219	7.5461	0.73	0.63	0.63	0
Tb927.2.3930	DNA replication licensing factor MCM3	DNA	101	229	303	282	51	83.7	103.4	106.8	96.6	112.1	6.3872	6.6921	6.7388	6.594	6.8086	0.78	0.75	0.75	0
Tb927.11.12250	DNA replication licensing factor MCM4	DNA	84	227	247	185	37	69.6	102.5	87	63.4	81.3	6.121	6.6795	6.4429	5.9864	6.3452	0.8	0.86	0.8	0
Tb927.11.5570	DNA replication licensing factor MCM5	DNA	84	198	160	166	41	69.6	89.4	56.4	56.9	90.1	6.121	6.4822	5.8176	5.8304	6.4935	1.22	0.77	0.77	0
Tb927.11.11640	DNA replication licensing factor MCM6	DNA	137	234	180	184	44	113.5	105.6	63.4	63	96.7	6.8265	6.7225	5.9864	5.9773	6.5954	1.67	1.09	1.09	0
Tb927.11.16140	DNA replication licensing factor MCM7	DNA	101	185	378	367	29	83.7	83.5	133.2	125.7	63.8	6.3872	6.3837	7.0575	6.9738	5.9955	0.63	1.31	0.63	0
Tb927.10.10410	DNA replication licensing factor MCM8	DNA	113	298	261	227	42	93.6	134.5	92	77.8	92.3	6.5484	7.0715	6.5236	6.2817	6.5283	1.02	1.01	1.01	0
Tb927.9.9600	DNA replication licensing factor MCM9	DNA	127	264	234	200	57	105.2	119.2	82.5	68.5	125.3	6.717	6.8972	6.3663	6.098	6.9692	1.28	0.84	0.84	0
Tb927.4.1330	DNA topoisomerase IB, large subunit	DNA	468	846	1709	2036	244	387.7	381.9	602.2	697.4	536.4	8.5988	8.5771	9.2341	9.4458	9.0672	0.55	0.71	0.55	0
Tb927.11.11540	DNA topoisomerase II, putative (TOP2)	DNA	428	687	764	922	233	354.5	310.2	269.2	315.8	512.3	8.4696	8.2771	8.0725	8.3029	9.0008	0.98	0.61	0.61	0
Tb927.11.9170	DNA topoisomerase III, putative	DNA	169	312	526	468	104	140	140.9	185.3	160.3	228.6	7.1293	7.1385	7.5337	7.3246	7.8367	0.76	0.61	0.61	0
Tb927.11.9520	DNA topoisomerase III, TOPO3 alpha	DNA	180	266	445	335	44	149.1	120.1	156.8	114.8	96.7	7.2201	6.9081	7.2928	6.843	6.5954	0.77	1.24	0.77	0
Tb927.9.6940	DNA topoisomerase type IB small subunit	DNA	103	233	298	324	47	85.3	105.2	105	111	103.3	6.4145	6.717	6.7142	6.7944	6.6907	0.77	0.83	0.77	0
Tb927.11.10640	DNA-(apurinic or apyrimidinic site) lyase, putative	DNA	115	228	208	265	41	95.3	102.9	73.3	90.8	90.1	6.5744	6.6851	6.1957	6.5046	6.4935	1.05	1.06	1.05	0
Tb927.9.4390	DNA-damage inducible protein DDI1-like protein (1L12.395)	DNA	164	365	521	533	74	135.8	164.8	183.6	182.6	162.7	7.0853	7.3646	7.5204	7.5125	7.3461	0.74	0.83	0.74	0
Tb927.9.11930	DNA-repair protein XPC	DNA	134	230	315	337	52	111	103.8	111	115.4	114.3	6.7944	6.6977	6.7944	6.8505	6.8367	0.9	0.91	0.9	0
Tb927.11.16270	DNAexcision repair helicase XPBR	DNA	138	304	324	291	41	114.3	137.2	114.2	99.7	90.1	6.8367	7.1001	6.8354	6.6395	6.4935	1	1.27	1	0
Tb927.2.4390	endo/exonuclease Mre11 (MRE11)	DNA	137	262	316	336	38	113.5	118.3	111.3	115.1	83.5	6.8265	6.8863	6.7983	6.8467	6.3837	0.99	1.36	0.99	0
Tb927.11.12090	endonuclease III, putative	DNA	96	148	183	199	18	79.5	66.8	64.5	68.2	39.6	6.3129	6.0618	6.0112	6.0917	5.3074	0.98	1.69	0.98	0
Tb927.10.6860	endonuclease V, putative	DNA	90	162	116	120	28	74.5	73.1	40.9	41.1	61.6	6.2192	6.1918	5.354	5.3611	5.9449	1.78	1.19	1.19	0
Tb927.11.7820	endonuclease/exonuclease/phosphatase, putative	DNA	176	219	416	395	115	145.8	98.9	146.6	135.3	252.8	7.1878	6.6279	7.1957	7.08	7.9819	0.67	0.39	0.39	0
Tb927.10.5510	endonuclease/exonuclease/phosphatase, putative	DNA	109	161	350	391	71	90.3	72.7	123.3	133.9	156.1	6.4967	6.1839	6.946	7.065	7.2863	0.54	0.47	0.47	0
Tb927.3.830	flap endonuclease-1 (FEN-1), putative	DNA	149	244	498	570	86	123.4	110.2	175.5	195.3	189.1	6.9472	6.784	7.4553	7.6095	7.563	0.56	0.58	0.56	0
Tb927.4.4680	GINS complex subunit PSF3, replication initiation	DNA	58	104	95	99	26	48	47	33.5	33.9	57.2	5.585	5.5546	5.0661	5.0832	5.8379	1.39	0.82	0.82	0
Tb927.10.12310	helicase-like protein	DNA	149	201	352	335	57	123.4	90.7	124	114.8	125.3	6.9472	6.503	6.9542	6.843	6.9692	0.73	0.72	0.72	0
Tb927.11.9330	helicase-like protein	DNA	146	202	163	170	33	120.9	91.2	57.4	58.2	72.6	6.9177	6.511	5.843	5.8629	6.1819	1.57	1.26	1.26	0
Tb927.9.13610	helicase, putative	DNA	394	526	922	975	172	326.4	237.5	324.9	334	378.1	8.3505	7.8918	8.3439	8.3837	8.5626	0.71	0.63	0.63	0
Tb927.3.3090	helicase, putative	DNA	155	265	418	422	47	128.4	119.6	147.3	144.6	103.3	7.0045	6.9021	7.2026	7.1759	6.6907	0.81	1.16	0.81	0
Tb927.5.3940	helicase, putative	DNA	152	263	342	342	65	125.9	118.7	120.5	117.2	142.9	6.9761	6.8912	6.9129	6.8728	7.1589	0.99	0.83	0.83	0
Tb927.10.5490	HOP1 homologue, HORMA domain, involved in meiosis?	DNA	66	158	151	182	26	54.7	71.3	53.2	62.3	57.2	5.7735	6.1558	5.7334	5.9612	5.8379	0.88	0.96	0.88	0
Tb927.2.5190	HOP2 putative homologue, involved in meiosis?	DNA	82	152	153	204	39	67.9	68.6	53.9	69.9	85.7	6.0853	6.1001	5.7522	6.1272	6.4212	0.97	0.79	0.79	0
Tb927.11.8700	hypothetical protein, conserved, DNA PolY-like superfamily domain: trans-lesion DNA synthesis.	DNA	135	230	335	292	43	111.8	103.8	118	100	94.5	6.8048	6.6977	6.8826	6.6439	6.5622	0.88	1.1	0.88	0
Tb927.9.11070	hypothetical protein, conserved,predicted zinc finger protein, MIZ	DNA	128	217	488	429	72	106	98	172	147	158.3	6.7279	6.6147	7.4263	7.1997	7.3065	0.57	0.62	0.57	0
Tb927.5.1700	Kinesin-2, also "replication Factor A 28 kDa subunit".	DNA	67	148	460	588	174	55.5	66.8	162.1	201.4	382.5	5.7944	6.0618	7.3407	7.6539	8.5793	0.28	0.15	0.15	0
Tb927.3.5030	KU70 protein (KU70)	DNA	94	240	261	288	40	77.9	108.4	92	98.7	87.9	6.2836	6.7602	6.5236	6.625	6.4578	0.79	0.89	0.79	0
Tb927.6.1760	KU80 protein (KU80)	DNA	97	207	189	198	67	80.3	93.5	66.6	67.8	147.3	6.3273	6.5469	6.0575	6.0832	7.2026	1.18	0.55	0.55	0
Tb927.8.6840	mismatch repair protein MLH1	DNA	110	207	244	208	24	91.1	93.5	86	71.2	52.8	6.5094	6.5469	6.4263	6.1538	5.7225	1.06	1.73	1.06	0
Tb927.9.5240	mismatch repair protein MSH3	DNA	148	414	281	226	47	122.6	186.9	99	77.4	103.3	6.9378	7.5461	6.6294	6.2743	6.6907	1.24	1.19	1.19	0
Tb927.10.1270	mismatch repair protein MSH4	DNA	143	220	308	267	54	118.5	99.3	108.5	91.5	118.7	6.8887	6.6337	6.7616	6.5157	6.8912	0.92	0.84	0.84	0
Tb927.3.4280	mismatch repair protein MSH5	DNA	97	264	326	292	44	80.3	119.2	114.9	100	96.7	6.3273	6.8972	6.8442	6.6439	6.5954	0.7	0.83	0.7	0
Tb927.10.6410	mismatch repair protein MSH8	DNA	180	360	516	549	65	149.1	162.5	181.8	188.1	142.9	7.2201	7.3443	7.5062	7.5554	7.1589	0.79	1.04	0.79	0
Tb927.9.14330	mismatch repair protein PMS1	DNA	194	463	574	543	123	160.7	209	202.3	186	270.4	7.3282	7.7074	7.6604	7.5392	8.079	0.79	0.59	0.59	0
Tb927.11.5670	MND1 homologue, putative involvement in meiosis	DNA	58	102	125	136	33	48	46	44	46.6	72.6	5.585	5.5236	5.4594	5.5423	6.1819	0.99	0.63	0.63	0
Tb927.11.9510	nucleic acid binding protein, putative	DNA	145	226	285	305	38	120.1	102	100.4	104.5	83.5	6.9081	6.6724	6.6496	6.7074	6.3837	0.98	1.22	0.98	0
Tb927.9.12810	poly(ADP-ribose) glycohydrolase, putative	DNA	75	157	157	209	19	62.1	70.9	55.3	71.6	41.8	5.9565	6.1477	5.7892	6.1619	5.3854	0.87	1.49	0.87	0
Tb927.5.4070	PPL1 priming DNA polymerase	DNA	139	226	182	164	33	115.1	102	64.1	56.2	72.6	6.8467	6.6724	6.0023	5.8125	6.1819	1.59	1.4	1.4	0
Tb927.10.2520	PPL2 DNA primase polymerase	DNA	117	273	301	264	27	96.9	123.3	106.1	90.4	59.4	6.5984	6.946	6.7293	6.4983	5.8924	0.91	1.63	0.91	0
Tb927.9.5190	proliferative cell nuclear antigen (PCNA), putative (28G16.165)	DNA	165	259	212	204	21	136.7	116.9	74.7	69.9	46.2	7.0949	6.8691	6.223	6.1272	5.5298	1.56	2.53	1.56	0
Tb927.11.8210	RAD50 DNA repair-like protein	DNA	316	463	884	1115	201	261.8	209	311.5	381.9	441.9	8.0323	7.7074	8.2831	8.5771	8.7876	0.55	0.47	0.47	0
Tb927.11.8190	RAD51 protein (RAD51)	DNA	164	398	318	282	40	135.8	179.7	112.1	96.6	87.9	7.0853	7.4894	6.8086	6.594	6.4578	1.21	1.54	1.21	0
Tb927.9.9620	RAD51/DMC1 protein, putative	DNA	138	242	404	378	53	114.3	109.3	142.4	129.5	116.5	6.8367	6.7721	7.1538	7.0168	6.8642	0.77	0.94	0.77	0
Tb927.7.6900	REC8, a rad 21 homologue, double-strand-break repair protein, putative	DNA	313	669	719	644	81	259.3	302	253.4	220.6	178.1	8.0185	8.2384	7.9853	7.7853	7.4765	1.02	1.46	1.02	0
Tb927.11.2550	recombinase rad51, putative	DNA	84	228	216	193	15	69.6	102.9	76.1	66.1	33	6.121	6.6851	6.2498	6.0466	5.0444	0.91	2.11	0.91	0
Tb927.8.5710	recombination initiation protein NBS1, putative	DNA	114	215	418	343	57	94.4	97.1	147.3	117.5	125.3	6.5607	6.6014	7.2026	6.8765	6.9692	0.64	0.75	0.64	0
Tb927.11.9130	replication factor A, 51kDa subunit, putative	DNA	88	195	191	246	23	72.9	88	67.3	84.3	50.6	6.1878	6.4594	6.0725	6.3975	5.6611	0.86	1.44	0.86	0
Tb927.11.5650	replication factor C large subunit, putative	DNA	184	303	475	546	69	152.4	136.8	167.4	187	151.7	7.2517	7.0959	7.3872	7.5469	7.2451	0.73	0.9	0.73	0
Tb927.6.3890	replication factor C, subunit 2, putative	DNA	69	226	233	229	30	57.2	102	82.1	78.4	66	5.8379	6.6724	6.3593	6.2928	6.0444	0.7	0.87	0.7	0
Tb927.9.12300	replication factor C, subunit 3, putative	DNA	164	433	513	416	89	135.8	195.5	180.8	142.5	195.7	7.0853	7.611	7.4983	7.1548	7.6125	0.75	0.69	0.69	0
Tb927.11.9550	replication factor C, subunit 4, putative	DNA	98	174	297	288	39	81.2	78.6	104.7	98.7	85.7	6.3434	6.2965	6.7101	6.625	6.4212	0.75	0.92	0.75	0
Tb927.10.7990	replication factor C, subunit 5, putative,ATPase, putative	DNA	135	231	285	216	27	111.8	104.3	100.4	74	59.4	6.8048	6.7046	6.6496	6.2095	5.8924	1.04	1.76	1.04	0
Tb927.10.5070	ribonuclease H, putative	DNA	83	197	207	165	17	68.8	88.9	72.9	56.5	37.4	6.1043	6.4741	6.1878	5.8202	5.225	0.94	1.84	0.94	0
Tb927.7.4930	ribonuclease H1	DNA	86	174	202	205	24	71.2	78.6	71.2	70.2	52.8	6.1538	6.2965	6.1538	6.1334	5.7225	1	1.35	1	0
Tb927.10.4730	ribonuclease HII, putative	DNA	85	146	113	123	28	70.4	65.9	39.8	42.1	61.6	6.1375	6.0422	5.3147	5.3957	5.9449	1.57	1.07	1.07	0
Tb927.4.1270	ruvB-like DNA helicase, putative	DNA	221	428	449	482	40	183.1	193.2	158.2	165.1	87.9	7.5165	7.594	7.3056	7.3672	6.4578	1.11	2.08	1.11	0
Tb927.4.2000	ruvB-like DNA helicase, putative,ATP-dependent DNA helicase, putative	DNA	222	412	639	746	78	183.9	186	225.2	255.5	171.5	7.5228	7.5392	7.8151	7.9972	7.4221	0.72	1.07	0.72	0
Tb927.1.3120	separase, putative,cysteine peptidase, Clan CD, family C50, putative	DNA	108	278	382	382	85	89.5	125.5	134.6	130.9	186.9	6.4838	6.9715	7.0725	7.0323	7.5461	0.66	0.48	0.48	0
Tb927.6.2890	single strand-specific nuclease, putative	DNA	60	81	129	133	11	49.7	36.6	45.5	45.6	24.2	5.6352	5.1938	5.5078	5.511	4.5969	0.8	1.51	0.8	0
Tb927.10.3860	SNF-7-like protein, putative	DNA	61	134	166	195	18	50.5	60.5	58.5	66.8	39.6	5.6582	5.9189	5.8704	6.0618	5.3074	0.76	1.28	0.76	0
Tb927.7.4650	SNF2 DNA repair protein, putative	DNA	178	350	656	709	166	147.4	158	231.2	242.9	365	7.2036	7.3038	7.853	7.9242	8.5118	0.61	0.4	0.4	0
Tb927.3.5440	SNF2 DNA repair protein, putative	DNA	199	359	567	652	107	164.8	162.1	199.8	223.3	235.2	7.3646	7.3407	7.6424	7.8028	7.8777	0.73	0.69	0.69	0
Tb927.11.7211	SNF2 DNA repair protein, putative	DNA	131	264	268	244	33	108.5	119.2	94.4	83.6	72.6	6.7616	6.8972	6.5607	6.3854	6.1819	1.15	1.49	1.15	0
Tb927.11.10730	SNF2 DNA repair protein, putative,ATP-dependent helicase, putative,SNF2 family helicase, putative	DNA	201	352	730	672	67	166.5	158.9	257.2	230.2	147.3	7.3794	7.312	8.0067	7.8467	7.2026	0.62	1.08	0.62	0
Tb927.11.5690	SNF2 DNA repair protein, putative,SNF2 family protein	DNA	252	405	666	736	104	208.7	182.8	234.7	252.1	228.6	7.7053	7.5141	7.8747	7.9779	7.8367	0.73	0.8	0.73	0
Tb927.11.5260	SNF2 DNA repair protein, putative,SNF2 family protein	DNA	108	172	239	240	26	89.5	77.7	84.2	82.2	57.2	6.4838	6.2798	6.3957	6.3611	5.8379	0.92	1.36	0.92	0
Tb927.5.3760	SPO11 meiotic recombination protein	DNA	46	104	95	99	16	38.1	47	33.5	33.9	35.2	5.2517	5.5546	5.0661	5.0832	5.1375	1.12	1.08	1.08	0
Tb927.11.6090	tatD related deoxyribonuclease, putative	DNA	90	167	175	182	26	74.5	75.4	61.7	62.3	57.2	6.2192	6.2365	5.9472	5.9612	5.8379	1.2	1.3	1.2	0
Tb927.11.1600	tatD related deoxyribonuclease, putative	DNA	71	186	136	150	17	58.8	84	47.9	51.4	37.4	5.8777	6.3923	5.582	5.6837	5.225	1.14	1.57	1.14	0
Tb927.3.1830	TbRM1, DNA recombination and antigenic switching	DNA	86	177	226	206	64	71.2	79.9	79.6	70.6	140.7	6.1538	6.3201	6.3147	6.1416	7.1365	0.89	0.51	0.51	0
Tb927.11.10190	telomerase reverse transcriptase, putative	DNA	216	369	540	579	77	178.9	166.6	190.3	198.3	169.3	7.483	7.3802	7.5721	7.6315	7.4034	0.84	0.98	0.84	0
Tb927.7.830	telomerase-associated protein, putative	DNA	485	569	1129	1040	307	401.7	256.9	397.8	356.2	674.9	8.65	8.0051	8.6359	8.4765	9.3985	0.65	0.38	0.38	0
Tb927.10.12850	ttaggg binding factor, telomer maintenance	DNA	1439	5605	2285	2488	706	1192	2530.5	805.2	852.3	1552.1	10.2192	11.3052	9.6532	9.7352	10.6	1.4	0.77	0.77	0
Tb927.2.5750	tyrosyl-DNA Phosphodiesterase (Tdp1), putative	DNA	148	265	370	330	67	122.6	119.6	130.4	113	147.3	6.9378	6.9021	7.0268	6.8202	7.2026	0.92	0.81	0.81	0
Tb927.10.13970	uracil-DNA glycosylase, putative	DNA	114	238	166	142	42	94.4	107.4	58.5	48.6	92.3	6.5607	6.7469	5.8704	5.6029	6.5283	1.61	1.02	1.02	0
Tb927.6.4650	UV excision repair RAD23 protein, putative	DNA	167	386	353	307	53	138.3	174.3	124.4	105.2	116.5	7.1117	7.4454	6.9588	6.717	6.8642	1.11	1.19	1.11	0
Tb927.9.11870	zinc finger protein, putative,predicted zinc finger protein, MIZ	DNA	128	254	272	316	24	106	114.7	95.8	108.2	52.8	6.7279	6.8417	6.582	6.7576	5.7225	0.98	2.01	0.98	0
Tb927.9.10580	3-demethylubiquinone-9 3-methyltransferase, putative	Enzyme	82	161	266	289	67	67.9	72.7	93.7	99	147.3	6.0853	6.1839	6.55	6.6294	7.2026	0.69	0.46	0.46	0
Tb927.11.6350	AAA ATPase, putative	Enzyme	329	610	903	816	106	272.5	275.4	318.2	279.5	233	8.0901	8.1054	8.3138	8.1267	7.8642	0.86	1.17	0.86	0
Tb927.11.13360	AAA ATPase, putative	Enzyme	322	410	791	751	143	266.7	185.1	278.7	257.3	314.4	8.0591	7.5322	8.1226	8.0073	8.2965	0.66	0.59	0.59	0
Tb927.11.4940	AAA ATPase, putative	Enzyme	85	208	267	272	55	70.4	93.9	94.1	93.2	120.9	6.1375	6.5531	6.5561	6.5423	6.9177	0.75	0.58	0.58	0
Tb927.3.1440	AAA ATPase, putative,Spastin, putative	Enzyme	103	219	1035	1047	74	85.3	98.9	364.7	358.6	162.7	6.4145	6.6279	8.5106	8.4862	7.3461	0.23	0.52	0.23	0
Tb927.6.3050	aldehyde dehydrogenase family, putative	Enzyme	87	181	381	373	65	72.1	81.7	134.3	127.8	142.9	6.1719	6.3523	7.0693	6.9977	7.1589	0.54	0.5	0.5	0
Tb927.6.4210	aldehyde dehydrogenase, putative (ALDH)	Enzyme	126	328	706	642	76	104.4	148.1	248.8	219.9	167.1	6.706	7.2104	7.9588	7.7807	7.3846	0.42	0.62	0.42	0
Tb927.2.5180	aldo-keto reductase, putative	Enzyme	160	233	230	233	47	132.5	105.2	81	79.8	103.3	7.0498	6.717	6.3399	6.3183	6.6907	1.3	1.02	1.02	0
Tb927.11.5360	aldo/keto reductase, putative	Enzyme	86	136	217	282	42	71.2	61.4	76.5	96.6	92.3	6.1538	5.9402	6.2574	6.594	6.5283	0.64	0.67	0.64	0
Tb927.9.3970	alpha/beta-hydrolase-like protein	Enzyme	73	158	140	166	14	60.5	71.3	49.3	56.9	30.8	5.9189	6.1558	5.6235	5.8304	4.9449	1.06	1.96	1.06	0
Tb927.11.8460	amastin-like protein	Enzyme	129	195	251	316	25	106.9	88	88.4	108.2	55	6.7401	6.4594	6.466	6.7576	5.7814	0.81	1.6	0.81	0
Tb927.7.5080	ATP-NAD kinase-like protein	Enzyme	124	218	248	246	29	102.7	98.4	87.4	84.3	63.8	6.6823	6.6206	6.4496	6.3975	5.9955	1.13	1.54	1.13	0
Tb927.11.9160	ATPase-like protein, putative	Enzyme	50	108	59	68	11	41.4	48.8	20.8	23.3	24.2	5.3716	5.6088	4.3785	4.5423	4.5969	1.78	1.71	1.71	0
Tb927.10.8070	ATPase, putative	Enzyme	99	291	314	299	75	82	131.4	110.6	102.4	164.9	6.3576	7.0378	6.7892	6.6781	7.3654	0.74	0.5	0.5	0
Tb927.11.960	ATPase, putative,cell division control protein 48 homolog, putative	Enzyme	113	238	231	193	23	93.6	107.4	81.4	66.1	50.6	6.5484	6.7469	6.347	6.0466	5.6611	1.15	1.85	1.15	0
Tb927.11.8730	ATPase, putative,S. cerevisiae cell division control protein 48 homolog, putative	Enzyme	105	172	201	161	38	87	77.7	70.8	55.1	83.5	6.4429	6.2798	6.1457	5.784	6.3837	1.1	0.93	0.93	0
Tb927.8.6420	beta-ketoacyl-ACP reductase 2	Enzyme	132	247	235	244	65	109.3	111.5	82.8	83.6	142.9	6.7721	6.8009	6.3716	6.3854	7.1589	1.31	0.76	0.76	0
Tb927.11.10060	Biotin--acetyl-CoA-carboxylase ligase, putative,biotin--protein ligase, putative	Enzyme	126	385	343	371	98	104.4	173.8	120.9	127.1	215.5	6.706	7.4413	6.9177	6.9898	7.7515	0.82	0.48	0.48	0
Tb927.11.8260	carbonic anhydrase-like protein	Enzyme	179	421	228	177	24	148.3	190.1	80.3	60.6	52.8	7.2124	7.5706	6.3273	5.9212	5.7225	1.85	2.81	1.85	0
Tb927.8.3860	CIA1 Cytosolic iron-sulphur cluster biogenesis	Enzyme	105	292	269	285	22	87	131.8	94.8	97.6	48.4	6.4429	7.0422	6.5668	6.6088	5.5969	0.89	1.8	0.89	0
Tb927.6.2200	Class 1 glutamine amido-transferase domain, or protease	Enzyme	171	256	201	169	17	141.6	115.6	70.8	57.9	37.4	7.1457	6.853	6.1457	5.8555	5.225	1.63	3.09	1.63	0
Tb927.6.3280	cyclosome subunit 1, putative	Enzyme	202	338	451	441	55	167.3	152.6	158.9	151.1	120.9	7.3863	7.2536	7.312	7.2394	6.9177	0.96	1.26	0.96	0
Tb927.7.5680	deoxyribose-phosphate aldolase, putative	Enzyme	71	147	117	135	21	58.8	66.4	41.2	46.2	46.2	5.8777	6.0531	5.3646	5.5298	5.5298	1.27	1.27	1.27	0
Tb927.6.710	dephospho-CoA kinase, putative	Enzyme	52	141	87	74	9	43.1	63.7	30.7	25.3	19.8	5.4296	5.9932	4.9402	4.6611	4.3074	1.4	2.18	1.4	0
Tb927.8.7380	dihydrolipoamide dehydrogenase, point mutation,acetoin dehydrogenase e3 component, putative	Enzyme	164	363	610	565	36	135.8	163.9	214.9	193.5	79.1	7.0853	7.3567	7.7475	7.5962	6.3056	0.63	1.72	0.63	0
Tb927.4.5040	dihydrolipoamide dehydrogenase, putative	Enzyme	130	260	332	321	28	107.7	117.4	117	110	61.6	6.7509	6.8753	6.8704	6.7814	5.9449	0.92	1.75	0.92	0
Tb927.3.4390	dihydrolipoamide dehydrogenase, putative (GCVL-1)	Enzyme	88	230	221	290	20	72.9	103.8	77.9	99.3	44	6.1878	6.6977	6.2836	6.6337	5.4594	0.73	1.66	0.73	0
Tb927.8.5630	dihydroorotase, putative	Enzyme	69	145	342	328	73	57.2	65.5	120.5	112.4	160.5	5.8379	6.0334	6.9129	6.8125	7.3264	0.47	0.36	0.36	0
Tb927.5.3830	dihydroorotate dehydrogenase (fumarate), putative	Enzyme	184	260	330	413	69	152.4	117.4	116.3	141.5	151.7	7.2517	6.8753	6.8617	7.1447	7.2451	0.83	0.77	0.77	0
Tb927.3.4340	diphthamide synthesis protein, putative	Enzyme	108	280	223	275	30	89.5	126.4	78.6	94.2	66	6.4838	6.9819	6.2965	6.5577	6.0444	0.95	1.36	0.95	0
Tb927.4.4650	diphthine synthase, putative	Enzyme	58	125	115	123	18	48	56.4	40.5	42.1	39.6	5.585	5.8176	5.3399	5.3957	5.3074	1.14	1.21	1.14	0
Tb927.6.2540	DREV methyltransferase, putative, Zinc finger domains	Enzyme	76	236	184	209	63	63	106.5	64.8	71.6	138.5	5.9773	6.7347	6.0179	6.1619	7.1137	0.88	0.45	0.45	0
Tb927.2.4930	esterase, putative	Enzyme	46	110	73	51	7	38.1	49.7	25.7	17.5	15.4	5.2517	5.6352	4.6837	4.1293	3.9449	1.48	2.47	1.48	0
Tb927.6.3320	ferric reductase transmembrane protein, putative	Enzyme	49	115	165	197	20	40.6	51.9	58.1	67.5	44	5.3434	5.6977	5.8605	6.0768	5.4594	0.6	0.92	0.6	0
Tb927.11.4430	ferric reductase, putative,ferric reductase transmembrane component, putative	Enzyme	99	199	390	385	38	82	89.8	137.4	131.9	83.5	6.3576	6.4886	7.1022	7.0433	6.3837	0.6	0.98	0.6	0
Tb927.2.5060	GTP binding protein, putative	Enzyme	278	484	913	1072	88	230.3	218.5	321.7	367.2	193.5	7.8474	7.7715	8.3296	8.5204	7.5962	0.6	1.13	0.6	0
Tb927.7.7450	GTP-binding protein, putative	Enzyme	225	323	536	523	66	186.4	145.8	188.9	179.2	145.1	7.5423	7.1878	7.5615	7.4854	7.1809	0.77	1	0.77	0
Tb927.7.580	GTP-binding protein, putative	Enzyme	102	217	424	515	52	84.5	98	149.4	176.4	114.3	6.4009	6.6147	7.223	7.4627	6.8367	0.48	0.74	0.48	0
Tb927.5.4310	GTP-binding protein, putative	Enzyme	153	322	393	424	63	126.7	145.4	138.5	145.2	138.5	6.9853	7.1839	7.1137	7.1819	7.1137	0.87	0.91	0.87	0
Tb927.10.7430	GTP-binding protein, putative	Enzyme	182	244	393	464	32	150.8	110.2	138.5	158.9	70.4	7.2365	6.784	7.1137	7.312	6.1375	0.69	1.57	0.69	0
Tb927.4.2190	GTP-binding protein, putative	Enzyme	146	211	274	228	33	120.9	95.3	96.6	78.1	72.6	6.9177	6.5744	6.594	6.2873	6.1819	0.99	1.31	0.99	0
Tb927.11.7370	haloacid dehalogenase hydrolase, putative	Enzyme	49	138	156	122	28	40.6	62.3	55	41.8	61.6	5.3434	5.9612	5.7814	5.3854	5.9449	0.74	0.66	0.66	0
Tb927.11.8440	haloacid dehalogenase-like hydrolase, putative	Enzyme	85	148	293	312	74	70.4	66.8	103.2	106.9	162.7	6.1375	6.0618	6.6893	6.7401	7.3461	0.62	0.41	0.41	0
Tb927.5.2380	hydrolase, alpha/beta fold family, putative	Enzyme	93	158	304	299	39	77	71.3	107.1	102.4	85.7	6.2668	6.1558	6.7428	6.6781	6.4212	0.67	0.83	0.67	0
Tb927.5.2370	hydrolase, alpha/beta fold family, putative	Enzyme	80	137	177	227	26	66.3	61.9	62.4	77.8	57.2	6.0509	5.9519	5.9635	6.2817	5.8379	0.8	1.08	0.8	0
Tb927.10.7230	hypothetical protein, conserved, 7 nucleoside diphostate kinase domains	Enzyme	537	787	1433	1284	169	444.8	355.3	505	439.8	371.5	8.797	8.4729	8.9801	8.7807	8.5372	0.7	0.96	0.7	0
Tb927.3.4420	hypothetical protein, conserved, alpha/beta hydrolase domain	Enzyme	134	184	206	179	13	111	83.1	72.6	61.3	28.6	6.7944	6.3768	6.1819	5.9378	4.8379	1.14	2.91	1.14	0
Tb927.4.2240	hypothetical protein, conserved, D-aminoacid aminotransferase domain, used for synthesis of D-glutamic acid and D-alanine	Enzyme	158	317	314	348	57	130.9	143.1	110.6	119.2	125.3	7.0323	7.1609	6.7892	6.8972	6.9692	1.1	1.04	1.04	0
Tb927.11.7390	hypothetical protein, conserved, extremely weak but blast-back positive match to yeast PDH1 which may participate in conversion of 2-methylcitrate to 2-methylisocitrate	Enzyme	50	117	146	139	23	41.4	52.8	51.4	47.6	50.6	5.3716	5.7225	5.6837	5.5729	5.6611	0.81	0.82	0.81	0
Tb927.7.5210	hypothetical protein, conserved, phosphatase domain and DUF	Enzyme	240	453	715	723	120	198.8	204.5	251.9	247.7	263.8	7.6352	7.676	7.9767	7.9525	8.0433	0.79	0.75	0.75	0
Tb927.7.5550	hypothetical protein, conserved, TLD domain	Enzyme	74	128	129	148	22	61.3	57.8	45.5	50.7	48.4	5.9378	5.853	5.5078	5.6639	5.5969	1.14	1.19	1.14	0
Tb927.5.1030	Iron-sulfur assembly protein 2 (Isa2)	Enzyme	44	110	186	226	33	36.4	49.7	65.5	77.4	72.6	5.1859	5.6352	6.0334	6.2743	6.1819	0.47	0.5	0.47	0
Tb927.4.2460	kinatase, putative	Enzyme	157	216	383	422	132	130	97.5	135	144.6	290.2	7.0224	6.6073	7.0768	7.1759	8.1809	0.67	0.34	0.34	0
Tb927.5.2650	L-galactonolactone oxidase (GAL/ALO)	Enzyme	76	121	191	198	7	63	54.6	67.3	67.8	15.4	5.9773	5.7708	6.0725	6.0832	3.9449	0.81	3.55	0.81	0
Tb927.10.1990	major vault protein, putative (MVP)	Enzyme	309	740	845	775	152	256	334.1	297.8	265.5	334.2	8	8.3841	8.2182	8.0526	8.3846	0.86	0.77	0.77	0
Tb927.5.4460	major vault protein, putative (MVP)	Enzyme	243	569	709	819	82	201.3	256.9	249.8	280.5	180.3	7.6532	8.0051	7.9646	8.1319	7.4943	0.72	1.12	0.72	0
Tb927.10.6310	major vault protein, putative (MVP)	Enzyme	193	404	707	685	142	159.9	182.4	249.1	234.6	312.2	7.321	7.511	7.9606	7.8741	8.2863	0.64	0.51	0.51	0
Tb927.8.1440	maoC-like dehydratase, putative	Enzyme	92	196	97	123	17	76.2	88.5	34.2	42.1	37.4	6.2517	6.4676	5.0959	5.3957	5.225	1.81	2.04	1.81	0
Tb927.10.6680	member of the NOL1/NOP2/sun family (S-adenosyl methionine methyltransferases)	Enzyme	116	287	293	290	51	96.1	129.6	103.2	99.3	112.1	6.5865	7.0179	6.6893	6.6337	6.8086	0.93	0.86	0.86	0
Tb927.8.2650	metallo-beta-lactamase-like protein, putative	Enzyme	104	200	303	265	39	86.1	90.3	106.8	90.8	85.7	6.4279	6.4967	6.7388	6.5046	6.4212	0.81	1	0.81	0
Tb927.1.1050	Metallo-dependent phosphatase-like domain-containing protein	Enzyme	171	304	380	358	84	141.6	137.2	133.9	122.6	184.7	7.1457	7.1001	7.065	6.9378	7.529	1.02	0.74	0.74	0
Tb927.11.10990	Methylthioribosephosphate isomerase (was annotated as EIF2B subunit)	Enzyme	151	225	261	242	71	125.1	101.6	92	82.9	156.1	6.9669	6.6668	6.5236	6.3733	7.2863	1.1	0.65	0.65	0
Tb927.5.490	methyltransferase, putative	Enzyme	118	246	431	393	46	97.7	111.1	151.9	134.6	101.1	6.6103	6.7957	7.247	7.0725	6.6596	0.64	0.97	0.64	0
Tb927.5.1460	Mo/Co carrier or lysine decarboxylase	Enzyme	214	474	455	437	46	177.3	214	160.3	149.7	101.1	7.47	7.7415	7.3246	7.2259	6.6596	1.11	1.75	1.11	0
Tb927.11.11920	molybdenum cofactor biosynthesis protein, putative	Enzyme	158	247	472	483	31	130.9	111.5	166.3	165.4	68.2	7.0323	6.8009	7.3776	7.3698	6.0917	0.67	1.63	0.67	0
Tb927.11.2330	molybdopterin synthase sulphurylase protein, putative	Enzyme	79	191	191	188	33	65.4	86.2	67.3	64.4	72.6	6.0312	6.4296	6.0725	6.009	6.1819	0.97	0.9	0.9	0
Tb927.9.1400	Monooxygenase, putative	Enzyme	176	325	536	614	89	145.8	146.7	188.9	210.3	195.7	7.1878	7.1967	7.5615	7.7163	7.6125	0.69	0.75	0.69	0
Tb927.11.4530	N-acetyltransferase subunit ARD1 (ARD1)	Enzyme	167	300	311	327	22	138.3	135.4	109.6	112	48.4	7.1117	7.0811	6.7761	6.8074	5.5969	1.21	2.8	1.21	0
Tb927.10.5670	N-acetyltransferase subunit Nat1, putative (NAT1)	Enzyme	153	257	209	233	20	126.7	116	73.6	79.8	44	6.9853	6.858	6.2016	6.3183	5.4594	1.45	2.64	1.45	0
Tb927.7.2360	N-acetyltransferase, putative	Enzyme	114	287	363	377	28	94.4	129.6	127.9	129.1	61.6	6.5607	7.0179	6.9989	7.0123	5.9449	0.73	1.53	0.73	0
Tb927.7.2530	N-acetyltransferase, putative	Enzyme	96	182	248	273	19	79.5	82.2	87.4	93.5	41.8	6.3129	6.3611	6.4496	6.5469	5.3854	0.85	1.9	0.85	0
Tb927.9.3360	N-acetyltransferase, putative	Enzyme	113	208	201	224	26	93.6	93.9	70.8	76.7	57.2	6.5484	6.5531	6.1457	6.2612	5.8379	1.22	1.64	1.22	0
Tb927.11.11100	N-acetyltransferase, putative	Enzyme	63	157	176	177	12	52.2	70.9	62	60.6	26.4	5.706	6.1477	5.9542	5.9212	4.7225	0.84	1.98	0.84	0
Tb927.10.3150	N-acetyltransferase, putative	Enzyme	101	241	134	119	19	83.7	108.8	47.2	40.8	41.8	6.3872	6.7655	5.5607	5.3505	5.3854	1.77	2	1.77	0
Tb927.11.14870	NAD synthase, putative	Enzyme	67	129	205	206	15	55.5	58.2	72.2	70.6	33	5.7944	5.8629	6.1739	6.1416	5.0444	0.77	1.68	0.77	0
Tb927.4.1950	NADPH--cytochrome p450 reductase, putative (CPR)	Enzyme	153	328	350	386	64	126.7	148.1	123.3	132.2	140.7	6.9853	7.2104	6.946	7.0466	7.1365	0.96	0.9	0.9	0
Tb927.9.13250	NADPH--cytochrome p450 reductase, putative (CPR)	Enzyme	109	272	275	239	36	90.3	122.8	96.9	81.9	79.1	6.4967	6.9402	6.5984	6.3558	6.3056	0.93	1.14	0.93	0
Tb927.10.10650	NAR1 Cytosolic iron-sulphur cluster biogenesis, hydrogenase large subunit	Enzyme	98	208	160	154	31	81.2	93.9	56.4	52.8	68.2	6.3434	6.5531	5.8176	5.7225	6.0917	1.44	1.19	1.19	0
Tb927.10.11590	nicotinate phosphoribosyltransferase, putative	Enzyme	121	248	458	466	42	100.2	112	161.4	159.6	92.3	6.6467	6.8074	7.3345	7.3183	6.5283	0.62	1.09	0.62	0
Tb927.6.2040	nitrate reductase, putative	Enzyme	65	95	214	148	18	53.8	42.9	75.4	50.7	39.6	5.7495	5.4229	6.2365	5.6639	5.3074	0.57	1.08	0.57	0
Tb927.7.7230	nitroreductase (NTR)	Enzyme	73	136	139	111	22	60.5	61.4	49	38	48.4	5.9189	5.9402	5.6147	5.2479	5.5969	1.23	1.25	1.23	0
Tb927.7.1930	nucleoside diphosphatase, putative,ectonucleoside triphosphate diphosphohydrolase 5, putative	Enzyme	45	89	95	92	8	37.3	40.2	33.5	31.5	17.6	5.2211	5.3291	5.0661	4.9773	4.1375	1.11	2.12	1.11	0
Tb927.10.1690	nucleotide binding protein, putative (NBP 1)	Enzyme	50	148	188	182	40	41.4	66.8	66.2	62.3	87.9	5.3716	6.0618	6.0488	5.9612	6.4578	0.63	0.47	0.47	0
Tb927.8.1520	NUDIX hydrolase	Enzyme	105	274	164	149	20	87	123.7	57.8	51	44	6.4429	6.9507	5.853	5.6724	5.4594	1.51	1.98	1.51	0
Tb927.6.2670	NUDIX hydrolase, conserved, has mRNA decapping activity in vitro	Enzyme	79	142	194	205	54	65.4	64.1	68.4	70.2	118.7	6.0312	6.0023	6.0959	6.1334	6.8912	0.91	0.54	0.54	0
Tb927.10.4680	NUDIX hydrolase, conserved,predicted MutT/NUDIX family protein	Enzyme	82	201	155	106	44	67.9	90.7	54.6	36.3	96.7	6.0853	6.503	5.7708	5.1819	6.5954	1.24	0.7	0.7	0
Tb927.11.9810	NUDIX hydrolase, homologue of YSA1	Enzyme	124	294	396	487	81	102.7	132.7	139.5	166.8	178.1	6.6823	7.052	7.1241	7.382	7.4765	0.62	0.58	0.58	0
Tb927.5.4350	NUDIX hydrolase, putative	Enzyme	74	108	199	218	56	61.3	48.8	70.1	74.7	123.1	5.9378	5.6088	6.1313	6.223	6.9437	0.65	0.4	0.4	0
Tb927.11.7770	oxidoreductase-like protein	Enzyme	147	303	534	584	133	121.8	136.8	188.2	200	292.4	6.9284	7.0959	7.5561	7.6439	8.1918	0.61	0.42	0.42	0
Tb927.10.16040	oxidoreductase-protein, putative	Enzyme	56	167	278	272	22	46.4	75.4	98	93.2	48.4	5.5361	6.2365	6.6147	6.5423	5.5969	0.47	0.96	0.47	0
Tb927.10.9560	oxidoreductase, putative	Enzyme	79	163	258	236	39	65.4	73.6	90.9	80.8	85.7	6.0312	6.2016	6.5062	6.3363	6.4212	0.72	0.76	0.72	0
Tb927.8.3970	oxidoreductase, putative	Enzyme	114	204	226	183	28	94.4	92.1	79.6	62.7	61.6	6.5607	6.5251	6.3147	5.9704	5.9449	1.16	1.5	1.16	0
Tb927.11.9560	oxidoreductase, putative	Enzyme	93	248	215	225	31	77	112	75.8	77.1	68.2	6.2668	6.8074	6.2441	6.2687	6.0917	1	1.13	1	0
Tb927.3.4990	oxidoreductase, putative	Enzyme	59	157	161	138	21	48.9	70.9	56.7	47.3	46.2	5.6118	6.1477	5.8253	5.5638	5.5298	0.86	1.06	0.86	0
Tb927.10.8000	P-loop nucleoside triphosphate hydrolase, EF hand domains	Enzyme	335	509	819	910	145	277.5	229.8	288.6	311.7	318.8	8.1163	7.8442	8.1729	8.284	8.3165	0.74	0.72	0.72	0
Tb927.8.7510	p-nitrophenylphosphatase, putative	Enzyme	82	161	174	172	19	67.9	72.7	61.3	58.9	41.8	6.0853	6.1839	5.9378	5.8802	5.3854	1.11	1.62	1.11	0
Tb927.11.7290	pantothenate kinase subunit, putative	Enzyme	430	906	1322	1221	229	356.2	409	465.8	418.2	503.5	8.4765	8.676	8.8636	8.708	8.9758	0.76	0.71	0.71	0
Tb927.11.7420	phosphoadenosine phosphosulfate reductase-like protein	Enzyme	112	216	341	322	77	92.8	97.5	120.2	110.3	169.3	6.5361	6.6073	6.9093	6.7853	7.4034	0.77	0.55	0.55	0
Tb927.9.13380	phosphoinositide-binding protein, putative	Enzyme	220	540	1125	1089	158	182.2	243.8	396.4	373	347.4	7.5094	7.9296	8.6308	8.543	8.4405	0.46	0.52	0.46	0
Tb927.6.2940	phosphopantothenoylcysteine decarboxylase, putative (PPCDC)	Enzyme	84	124	304	315	26	69.6	56	107.1	107.9	57.2	6.121	5.8074	6.7428	6.7536	5.8379	0.52	0.98	0.52	0
Tb927.5.3050	poly(ADP-ribose) polymerase, putative	Enzyme	96	243	303	298	46	79.5	109.7	106.8	102.1	101.1	6.3129	6.7774	6.7388	6.6738	6.6596	0.74	0.79	0.74	0
Tb927.6.1580	polynucleotide kinase 3'-phosphatase, putative	Enzyme	104	211	198	200	30	86.1	95.3	69.8	68.5	66	6.4279	6.5744	6.1252	6.098	6.0444	1.23	1.3	1.23	0
Tb927.11.14520	polypeptide deformylase, putative	Enzyme	92	182	258	223	54	76.2	82.2	90.9	76.4	118.7	6.2517	6.3611	6.5062	6.2555	6.8912	0.84	0.64	0.64	0
Tb927.9.2320	POMP1 (possible S-Adenosyl methionine methyl transferase (yeast Cgt1 is involved in lipid homeostasis)	Enzyme	51	88	90	101	13	42.2	39.7	31.7	34.6	28.6	5.3992	5.3111	4.9864	5.1127	4.8379	1.15	1.39	1.15	0
Tb927.8.2960	Probable methyltransferase BTM2 homolog	Enzyme	133	215	268	255	35	110.2	97.1	94.4	87.3	76.9	6.784	6.6014	6.5607	6.4479	6.2649	1.03	1.26	1.03	0
Tb927.10.7850	protein-L-isoaspartate, putative	Enzyme	108	305	185	202	16	89.5	137.7	65.2	69.2	35.2	6.4838	7.1054	6.0268	6.1127	5.1375	1.29	2.54	1.29	0
Tb927.10.5750	protocatechuate 4,5-dioxygenase-like protein	Enzyme	59	112	146	149	26	48.9	50.6	51.4	51	57.2	5.6118	5.6611	5.6837	5.6724	5.8379	0.95	0.85	0.85	0
Tb927.8.3740	pterin 4 alpha carbinolamine dehydratase, putative	Enzyme	131	328	291	293	64	108.5	148.1	102.5	100.4	140.7	6.7616	7.2104	6.6795	6.6496	7.1365	1.06	0.77	0.77	0
Tb927.6.2740	pyridoxal kinase (pdxK)	Enzyme	227	481	541	578	176	188	217.2	190.6	198	386.9	7.5546	7.7629	7.5744	7.6294	8.5958	0.95	0.49	0.49	0
Tb927.6.1850	quiescin sulfhydryl oxidase (QSOX)	Enzyme	84	186	246	262	24	69.6	84	86.7	89.7	52.8	6.121	6.3923	6.438	6.487	5.7225	0.78	1.32	0.78	0
Tb927.9.12410	riboflavin kinase, putative	Enzyme	82	164	114	149	11	67.9	74	40.2	51	24.2	6.0853	6.2095	5.3291	5.6724	4.5969	1.33	2.81	1.33	0
Tb927.7.6890	S-adenosyl-methionine-dependent methyl transferase, putative	Enzyme	150	280	281	226	39	124.2	126.4	99	77.4	85.7	6.9565	6.9819	6.6294	6.2743	6.4212	1.25	1.45	1.25	0
Tb927.6.4840	S-adenosylmethionine synthetase, putative (METK1)	Enzyme	982	3005	1763	1607	266	813.4	1356.7	621.2	550.5	584.8	9.6678	10.4059	9.2789	9.1046	9.1918	1.31	1.39	1.31	0
Tb927.10.9410	selenophosphate synthetase, putative	Enzyme	86	225	418	430	52	71.2	101.6	147.3	147.3	114.3	6.1538	6.6668	7.2026	7.2026	6.8367	0.48	0.62	0.48	0
Tb927.5.1210	short-chain dehydrogenase, putative	Enzyme	237	380	585	651	101	196.3	171.6	206.1	223	222	7.6169	7.4229	7.6872	7.8009	7.7944	0.77	0.77	0.77	0
Tb927.10.12240	short-chain dehydrogenase, putative	Enzyme	110	232	292	327	58	91.1	104.7	102.9	112	127.5	6.5094	6.7101	6.6851	6.8074	6.9944	0.81	0.71	0.71	0
Tb927.9.14040	short-chain dehydrogenase, putative	Enzyme	66	118	234	205	16	54.7	53.3	82.5	70.2	35.2	5.7735	5.7361	6.3663	6.1334	5.1375	0.65	1.51	0.65	0
Tb927.11.10020	short-chain dehydrogenase, putative	Enzyme	120	224	229	255	43	99.4	101.1	80.7	87.3	94.5	6.6352	6.6596	6.3345	6.4479	6.5622	1.14	1.05	1.05	0
Tb927.9.14070	short-chain dehydrogenase, putative	Enzyme	76	182	227	200	23	63	82.2	80	68.5	50.6	5.9773	6.3611	6.3219	6.098	5.6611	0.79	1.25	0.79	0
Tb927.10.6870	short-chain dehydrogenase, putative	Enzyme	83	122	163	154	26	68.8	55.1	57.4	52.8	57.2	6.1043	5.784	5.843	5.7225	5.8379	0.96	0.96	0.96	0
Tb927.7.310	Thioredoxin domain, also matches human prostaglandin E synthetase	Enzyme	41	117	70	75	21	34	52.8	24.7	25.7	46.2	5.0875	5.7225	4.6264	4.6837	5.5298	1.32	0.74	0.74	0
Tb927.9.15660	ACP6	ESAG	102	161	176	141	22	84.5	72.7	62	48.3	48.4	6.4009	6.1839	5.9542	5.594	5.5969	1.17	1.5	1.17	0
Tb927.4.3290	ESAG2-like	ESAG	3	2	7	1	7	2.5	0.9	2.5	0.3	15.4	1.3219	-0.152	1.3219	-1.737	3.9449	0.36	0.06	0.06	1
Tb927.11.14620	ESAG2, putative	ESAG	593	1795	2284	3108	183	491.2	810.4	804.8	1064.6	402.3	8.9402	9.6625	9.6525	10.0561	8.6521	0.46	1.22	0.46	0
Tb927.4.3280	ESAG2, putative	ESAG	1	2	5	9	10	0.8	0.9	1.8	3.1	22	-0.3219	-0.152	0.848	1.6323	4.4594	0.26	0.04	0.04	1
Tb927.10.9500	ESAG3, putative	ESAG	116	153	430	454	57	96.1	69.1	151.5	155.5	125.3	6.5865	6.1106	7.2432	7.2808	6.9692	0.44	0.55	0.44	0
Tb927.2.2020	ESAG3, putative	ESAG	90	186	294	347	68	74.5	84	103.6	118.9	149.5	6.2192	6.3923	6.6949	6.8936	7.224	0.63	0.5	0.5	0
Tb927.10.4370	ESAG3, putative	ESAG	62	187	215	258	49	51.4	84.4	75.8	88.4	107.7	5.6837	6.3992	6.2441	6.466	6.7509	0.58	0.48	0.48	0
Tb927.5.340	ESAG5-related protein, putative	ESAG	86	235	256	278	41	71.2	106.1	90.2	95.2	90.1	6.1538	6.7293	6.4951	6.5729	6.4935	0.75	0.79	0.75	0
Tb927.2.1920	ESAG5, putative	ESAG	179	394	552	572	119	148.3	177.9	194.5	195.9	261.6	7.2124	7.4749	7.6036	7.614	8.0312	0.76	0.57	0.57	0
Tb927.9.15890	ESAG5, putative	ESAG	215	488	429	604	44	178.1	220.3	151.2	206.9	96.7	7.4765	7.7833	7.2403	7.6928	6.5954	0.86	1.84	0.86	0
Tb927.4.810	ESAG5, putative	ESAG	115	262	344	423	45	95.3	118.3	121.2	144.9	98.9	6.5744	6.8863	6.9212	7.1789	6.6279	0.66	0.96	0.66	0
Tb927.6.2850	ESAG8-associated protein, putative (PIE8)	ESAG	93	107	200	211	30	77	48.3	70.5	72.3	66	6.2668	5.594	6.1396	6.1759	6.0444	0.67	0.73	0.67	0
Tb927.1.3670	ESAG8, putative	ESAG	141	295	375	495	39	116.8	133.2	132.1	169.6	85.7	6.8679	7.0575	7.0455	7.406	6.4212	0.69	1.36	0.69	0
Tb927.7.170	ESAG9, putative	ESAG	133	209	347	397	28	110.2	94.4	122.3	136	61.6	6.784	6.5607	6.9343	7.0875	5.9449	0.69	1.53	0.69	0
Tb927.5.120	ESAG9, putative	ESAG	98	165	247	287	17	81.2	74.5	87	98.3	37.4	6.3434	6.2192	6.4429	6.6191	5.225	0.76	1.99	0.76	0
Tb927.9.7370	ESAG9, putative	ESAG	25	70	194	206	10	20.7	31.6	68.4	70.6	22	4.3716	4.9819	6.0959	6.1416	4.4594	0.29	0.94	0.29	0
Tb927.1.5080	ESAG9, putative	ESAG	64	96	190	181	21	53	43.3	67	62	46.2	5.7279	5.4363	6.0661	5.9542	5.5298	0.65	0.94	0.65	0
Tb927.5.4620	ESAG9, putative	ESAG	37	80	163	174	9	30.6	36.1	57.4	59.6	19.8	4.9355	5.1739	5.843	5.8972	4.3074	0.51	1.55	0.51	0
Tb927.9.7340	ESAG9, putative	ESAG	27	42	75	96	8	22.4	19	26.4	32.9	17.6	4.4854	4.2479	4.7225	5.04	4.1375	0.58	1.08	0.58	0
Tb927.9.7420	ESAG9, putative	ESAG	0	0	0	0	0	0	0	0	0	0									1
Tb927.1.5220	ESAG9, putative	ESAG	0	0	0	0	0	0	0	0	0	0									1
Tb927.8.2610	5-methyltetrahydropteroyltriglutamate-homocysteine S-methyltransferase, putative	Folate	107	199	254	251	52	88.6	89.8	89.5	86	114.3	6.4692	6.4886	6.4838	6.4263	6.8367	0.99	0.78	0.78	0
Tb927.7.1600	C-1-tetrahydrofolate synthase, cytoplasmic, putative	Folate	67	220	160	167	15	55.5	99.3	56.4	57.2	33	5.7944	6.6337	5.8176	5.8379	5.0444	0.97	1.68	0.97	0
Tb927.7.5480	dihydrofolate reductase-thymidylate synthase (DHFR-TS)	Folate	70	132	134	113	24	58	59.6	47.2	38.7	52.8	5.858	5.8972	5.5607	5.2743	5.7225	1.23	1.1	1.1	0
Tb927.8.3620	folate transporter, ESAG10, putative	Folate	340	602	1090	1124	153	281.6	271.8	384.1	385	336.4	8.1375	8.0864	8.5853	8.5887	8.394	0.71	0.81	0.71	0
Tb927.10.7520	folylpolyglutamate synthase, putative (FPGS)	Folate	86	217	124	155	22	71.2	98	43.7	53.1	48.4	6.1538	6.6147	5.4496	5.7306	5.5969	1.34	1.47	1.34	0
Tb927.8.2210	pteridine reductase (PTR1)	Folate	82	199	157	188	54	67.9	89.8	55.3	64.4	118.7	6.0853	6.4886	5.7892	6.009	6.8912	1.05	0.57	0.57	0
Tb927.1.2820	pteridine transporter, putative	Folate	208	622	655	626	108	172.3	280.8	230.8	214.4	237.4	7.4288	8.1334	7.8505	7.7442	7.8912	0.75	0.73	0.73	0
Tb927.10.9080	pteridine transporter, putative	Folate	148	528	451	488	104	122.6	238.4	158.9	167.2	228.6	6.9378	7.8972	7.312	7.3854	7.8367	0.73	0.54	0.54	0
Tb927.11.7040	pterin-4-alpha-carbinolamine dehydratase, putative	Folate	126	237	278	281	114	104.4	107	98	96.3	250.6	6.706	6.7415	6.6147	6.5895	7.9692	1.07	0.42	0.42	0
Tb927.10.7930	2,3-bisphosphoglycerate-independent phosphoglycerate mutase (PGAM)	Glucose.glycerol	362	619	779	626	106	299.9	279.5	274.5	214.4	233	8.2283	8.1267	8.1007	7.7442	7.8642	1.02	1.2	1.02	0
Tb927.11.11490	2,3-bisphosphoglycerate-independent phosphoglycerate mutase-like protein, putative	Glucose.glycerol	129	265	223	197	29	106.9	119.6	78.6	67.5	63.8	6.7401	6.9021	6.2965	6.0768	5.9955	1.36	1.68	1.36	0
Tb927.7.1610	6-phosphofructo-2-kinase/fructose-2,6-biphosphatase, putative	Glucose.glycerol	91	293	337	312	51	75.4	132.3	118.7	106.9	112.1	6.2365	7.0477	6.8912	6.7401	6.8086	0.64	0.67	0.64	0
Tb927.8.1020	6-phosphofructo-2-kinase/fructose-2,6-biphosphatase, putative	Glucose.glycerol	75	140	320	358	63	62.1	63.2	112.8	122.6	138.5	5.9565	5.9819	6.8176	6.9378	7.1137	0.51	0.45	0.45	0
Tb927.3.2710	6-phosphofructo-2-kinase/fructose-2,6-bisphosphatase	Glucose.glycerol	152	329	416	426	44	125.9	148.5	146.6	145.9	96.7	6.9761	7.2143	7.1957	7.1888	6.5954	0.86	1.3	0.86	0
Tb927.11.6330	6-phosphoglucolactonase	Glucose.glycerol	60	107	85	76	4	49.7	48.3	30	26	8.8	5.6352	5.594	4.9069	4.7004	3.1375	1.61	5.49	1.61	0
Tb927.8.2520	Acetyl-CoA synthetase	Glucose.glycerol	211	456	479	447	62	174.8	205.9	168.8	153.1	136.3	7.4496	7.6858	7.3992	7.2583	7.0906	1.04	1.28	1.04	0
Tb927.4.1360	Aldose-1-epimerase, putative	Glucose.glycerol	85	133	204	197	51	70.4	60	71.9	67.5	112.1	6.1375	5.9069	6.1679	6.0768	6.8086	0.83	0.54	0.54	0
Tb927.10.9760	alternative oxidase	Glucose.glycerol	59	122	112	104	20	48.9	55.1	39.5	35.6	44	5.6118	5.784	5.3038	5.1538	5.4594	1.24	1.11	1.11	0
Tb927.10.7090	alternative oxidase (AOX or TAO complex)	Glucose.glycerol	719	595	850	790	89	595.6	268.6	299.5	270.6	195.7	9.2182	8.0693	8.2264	8.08	7.6125	0.9	1.37	0.9	0
Tb927.3.3270	ATP-dependent phosphofructokinase (TbPFK)	Glucose.glycerol	1806	2295	4436	4031	517	1496	1036.1	1563.1	1380.8	1136.6	10.5469	10.0169	10.6102	10.4313	10.1505	0.66	0.91	0.66	0
Tb927.11.11250	cytosolic malate dehydrogenase (cMDH)	Glucose.glycerol	338	550	725	833	139	280	248.3	255.5	285.3	305.6	8.1293	7.9559	7.9972	8.1563	8.2555	0.87	0.81	0.81	0
Tb927.10.2890	enolase	Glucose.glycerol	2166	3990	3266	3226	540	1794.2	1801.4	1150.9	1105.1	1187.2	10.8091	10.8149	10.1685	10.11	10.2133	1.56	1.51	1.51	0
Tb927.11.16410	enolase, putative	Glucose.glycerol	110	227	258	253	22	91.1	102.5	90.9	86.7	48.4	6.5094	6.6795	6.5062	6.438	5.5969	1	1.88	1	0
Tb927.10.4520	fructose- 2,6- bisphosphatase-like protein	Glucose.glycerol	100	231	181	203	60	82.8	104.3	63.8	69.5	131.9	6.3716	6.7046	5.9955	6.1189	7.0433	1.19	0.63	0.63	0
Tb927.9.8720	fructose-1,6-bisphosphatase (FBPase)	Glucose.glycerol	190	382	589	516	68	157.4	172.5	207.5	176.8	149.5	7.2983	7.4305	7.697	7.466	7.224	0.76	1.05	0.76	0
Tb927.10.5620	fructose-bisphosphate aldolase, glycosomal (ALD)	Glucose.glycerol	6102	9268	10575	9869	1205	5054.5	4184.2	3726.3	3380.6	2649.2	12.3034	12.0307	11.8635	11.7231	11.3713	1.12	1.58	1.12	0
Tb927.11.16770	glucosamine-6-phosphate isomerase, putative	Glucose.glycerol	140	237	290	384	68	116	107	102.2	131.5	149.5	6.858	6.7415	6.6753	7.0389	7.224	0.81	0.72	0.72	0
Tb927.4.2290	glucose transporter, putative	Glucose.glycerol	86	206	294	235	68	71.2	93	103.6	80.5	149.5	6.1538	6.5392	6.6949	6.3309	7.224	0.69	0.48	0.48	0
Tb927.10.2490	glucose-6-phosphate 1-dehydrogenase (G6PD)	Glucose.glycerol	144	258	372	403	59	119.3	116.5	131.1	138	129.7	6.8985	6.8642	7.0345	7.1085	7.019	0.84	0.9	0.84	0
Tb927.1.3830	glucose-6-phosphate isomerase, glycosomal (PGI)	Glucose.glycerol	608	1177	1605	1909	331	503.6	531.4	565.6	653.9	727.7	8.9761	9.0537	9.1436	9.3529	9.5072	0.77	0.69	0.69	0
Tb927.10.6880	glyceraldehyde 3-phosphate dehydrogenase, cytosolic (GAP)	Glucose.glycerol	458	625	868	878	103	379.4	282.2	305.9	300.8	226.4	8.5676	8.1406	8.2569	8.2327	7.8227	0.92	1.25	0.92	0
Tb927.6.4280	glyceraldehyde 3-phosphate dehydrogenase, glycosomal (GAPDH)	Glucose.glycerol	6033	6976	7485	6023	865	4997.3	3149.4	2637.5	2063.2	1901.7	12.2869	11.6209	11.365	11.0107	10.8931	1.19	1.66	1.19	0
Tb927.9.9820	glyceraldehyde-3-phosphate dehydrogenase, putative	Glucose.glycerol	169	293	257	256	35	140	132.3	90.6	87.7	76.9	7.1293	7.0477	6.5014	6.4545	6.2649	1.46	1.72	1.46	0
Tb927.9.12550	glycerol kinase, glycosomal (glk1)	Glucose.glycerol	1882	3741	3924	3401	593	1558.9	1688.9	1382.7	1165	1303.7	10.6063	10.7219	10.4333	10.1861	10.3484	1.13	1.2	1.13	0
Tb927.10.15910	glycerol uptake protein, putative	Glucose.glycerol	160	254	494	454	108	132.5	114.7	174.1	155.5	237.4	7.0498	6.8417	7.4438	7.2808	7.8912	0.66	0.48	0.48	0
Tb927.1.1130	glycerol-3-phosphate dehydrogenase (FAD-dependent), in TAO complex	Glucose.glycerol	110	193	163	132	23	91.1	87.1	57.4	45.2	50.6	6.5094	6.4446	5.843	5.4983	5.6611	1.52	1.72	1.52	0
Tb927.11.7380	glycerol-3-phosphate dehydrogenase (FAD-dependent), mitochondrial, TAO complex	Glucose.glycerol	319	539	949	967	91	264.2	243.3	334.4	331.2	200.1	8.0455	7.9266	8.3854	8.3716	7.6446	0.73	1.22	0.73	0
Tb927.8.3530	glycerol-3-phosphate dehydrogenase [NAD ], glycosomal	Glucose.glycerol	2026	2834	1646	1452	186	1678.2	1279.5	580	497.4	408.9	10.7127	10.3214	9.1799	8.9583	8.6756	2.21	3.13	2.21	0
Tb927.11.2920	glycerolphosphate mutase, putative	Glucose.glycerol	78	210	212	214	20	64.6	94.8	74.7	73.3	44	6.0135	6.5668	6.223	6.1957	5.4594	0.86	1.47	0.86	0
Tb927.10.15410	glycosomal malate dehydrogenase (gMDH)	Glucose.glycerol	72	197	175	166	22	59.6	88.9	61.7	56.9	48.4	5.8972	6.4741	5.9472	5.8304	5.5969	0.97	1.23	0.97	0
Tb927.2.4210	glycosomal phosphoenolpyruvate carboxykinase (PEPCK)	Glucose.glycerol	193	379	471	444	64	159.9	171.1	166	152.1	140.7	7.321	7.4187	7.375	7.2489	7.1365	0.96	1.14	0.96	0
Tb927.10.2020	hexokinase (HK2)	Glucose.glycerol	4590	5081	2633	2285	368	3802	2293.9	927.8	782.7	809	11.8925	11.1636	9.8577	9.6123	9.66	2.47	2.84	2.47	0
Tb927.11.5350	myo-inositol/proton symporter (MIT)	Glucose.glycerol	68	182	273	227	28	56.3	82.2	96.2	77.8	61.6	5.8151	6.3611	6.588	6.2817	5.9449	0.59	0.91	0.59	0
Tb927.8.980	Phosphoacetylglucosamine mutase PAGM, acts as phosphoglucomutase	Glucose.glycerol	198	427	471	473	45	164	192.8	166	162	98.9	7.3576	7.591	7.375	7.3399	6.6279	0.99	1.66	0.99	0
Tb927.1.710	phosphoglycerate kinase (PGKB)	Glucose.glycerol	523	1090	1201	1249	89	433.2	492.1	423.2	427.8	195.7	8.7589	8.9428	8.7252	8.7408	7.6125	1.01	2.21	1.01	0
Tb927.11.2380	phosphoglycerate kinase, putative	Glucose.glycerol	147	229	247	267	44	121.8	103.4	87	91.5	96.7	6.9284	6.6921	6.4429	6.5157	6.5954	1.13	1.07	1.07	0
Tb927.5.3580	phosphoglycerate mutase protein, putative	Glucose.glycerol	41	89	159	168	36	34	40.2	56	57.5	79.1	5.0875	5.3291	5.8074	5.8455	6.3056	0.59	0.43	0.43	0
Tb927.11.2910	phosphoglycerate mutase, putative (iPGAM)	Glucose.glycerol	87	206	215	180	30	72.1	93	75.8	61.7	66	6.1719	6.5392	6.2441	5.9472	6.0444	0.95	1.09	0.95	0
Tb927.10.6440	Phosphomannomutase PMM, acts as phosphoglucomutase	Glucose.glycerol	83	170	289	326	73	68.8	76.7	101.8	111.7	160.5	6.1043	6.2612	6.6696	6.8035	7.3264	0.62	0.43	0.43	0
Tb927.11.14780	phosphomannose isomerase, putative	Glucose.glycerol	113	223	452	579	119	93.6	100.7	159.3	198.3	261.6	6.5484	6.6539	7.3156	7.6315	8.0312	0.47	0.36	0.36	0
Tb927.11.9350	phosphonopyruvate decarboxylase-like protein, putative	Glucose.glycerol	108	165	266	249	11	89.5	74.5	93.7	85.3	24.2	6.4838	6.2192	6.55	6.4145	4.5969	0.8	3.08	0.8	0
Tb927.10.14140	pyruvate kinase 1 (PYK1)	Glucose.glycerol	2571	3413	5086	5284	704	2129.6	1540.9	1792.2	1810	1547.7	11.0564	10.5896	10.8075	10.8218	10.5959	0.85	1	0.85	0
Tb927.11.6280	pyruvate phosphate dikinase (PPDK)	Glucose.glycerol	161	262	532	549	46	133.4	118.3	187.5	188.1	101.1	7.0596	6.8863	7.5507	7.5554	6.6596	0.63	1.17	0.63	0
Tb927.2.5800	sedoheptulose-1,7-bisphosphatase (SBPase)	Glucose.glycerol	137	257	331	260	48	113.5	116	116.6	89.1	105.5	6.8265	6.858	6.8654	6.4774	6.7211	0.97	1.08	0.97	0
Tb927.8.5600	transaldolase, putative	Glucose.glycerol	125	311	576	650	99	103.5	140.4	203	222.7	217.7	6.6935	7.1334	7.6653	7.799	7.7662	0.46	0.48	0.46	0
Tb927.11.5520	triosephosphate isomerase (TIM)	Glucose.glycerol	463	663	984	1086	115	383.5	299.3	346.7	372	252.8	8.5831	8.2254	8.4375	8.5392	7.9819	0.8	1.18	0.8	0
Tb927.9.9200	alpha-1,2-mannosyltransferase, putative	Glycans	107	224	212	208	28	88.6	101.1	74.7	71.2	61.6	6.4692	6.6596	6.223	6.1538	5.9449	1.19	1.44	1.19	0
Tb927.11.16560	CMP-sialic acid transporter, putative	Glycans	110	187	362	427	73	91.1	84.4	127.6	146.3	160.5	6.5094	6.3992	6.9955	7.1928	7.3264	0.58	0.53	0.53	0
Tb927.9.12790	dolichol kinase, putative	Glycans	68	147	304	321	59	56.3	66.4	107.1	110	129.7	5.8151	6.0531	6.7428	6.7814	7.019	0.51	0.43	0.43	0
Tb927.10.4610	dolicholphosphate-mannose synthase, putative	Glycans	111	292	296	295	46	91.9	131.8	104.3	101.1	101.1	6.522	7.0422	6.7046	6.6596	6.6596	0.88	0.91	0.88	0
Tb927.10.4700	dolicholphosphate-mannose synthase, putative	Glycans	79	174	245	267	59	65.4	78.6	86.3	91.5	129.7	6.0312	6.2965	6.4313	6.5157	7.019	0.71	0.5	0.5	0
Tb927.4.2230	dolichyl-P-Man:GDP-Man1GlcNAc2-PP-dolichyl alpha-1,3-mannosyltransferase, putative	Glycans	96	227	312	371	253	79.5	102.5	109.9	127.1	556.2	6.3129	6.6795	6.78	6.9898	9.1195	0.63	0.14	0.14	0
Tb927.6.1140	dolichyl-P-Man:GDP-Man5GlcNAc2-PP-dolichyl alpha-1,2-mannosyltransferase, putative	Glycans	110	217	232	257	61	91.1	98	81.8	88	134.1	6.5094	6.6147	6.354	6.4594	7.0672	1.04	0.68	0.68	0
Tb927.11.11670	dolichyl-P-Man:GDP-Man5GlcNAc2-PP-dolichyl alpha-1,2-mannosyltranslocase, putative	Glycans	82	191	190	196	20	67.9	86.2	67	67.1	44	6.0853	6.4296	6.0661	6.0682	5.4594	1.01	1.54	1.01	0
Tb927.10.6530	dolichyl-P-Man:GDP-Man5GlcNAc2-PP-dolichyl alpha-1,3-mannosyltransferase, putative	Glycans	83	228	202	222	28	68.8	102.9	71.2	76	61.6	6.1043	6.6851	6.1538	6.2479	5.9449	0.91	1.12	0.91	0
Tb927.2.4720	dolichyl-P-Man:GDP-Man7GlcNAc2-PP-dolichyl alpha-1,6-mannosyltransferase, putative	Glycans	110	228	125	130	48	91.1	102.9	44	44.5	105.5	6.5094	6.6851	5.4594	5.4757	6.7211	2.05	0.86	0.86	0
Tb927.10.13210	dolichyl-P-Man:GDP-ManGlcNAc2-PP-dolichyl beta-1,4-mannosyltransferase, putative	Glycans	62	156	144	178	16	51.4	70.4	50.7	61	35.2	5.6837	6.1375	5.6639	5.9307	5.1375	0.84	1.46	0.84	0
Tb927.9.3400	endo-beta-N-acetylglucosaminidase, putative	Glycans	177	375	579	559	95	146.6	169.3	204	191.5	208.9	7.1957	7.4034	7.6724	7.5812	7.7067	0.72	0.7	0.7	0
Tb927.10.13630	ER glucosidase II	Glycans	279	689	1409	1517	459	231.1	311.1	496.5	519.6	1009.1	7.8524	8.2812	8.9556	9.0213	9.9789	0.44	0.23	0.23	0
Tb927.11.13990	GDP-L-fucose synthetase, putative	Glycans	91	227	104	83	27	75.4	102.5	36.6	28.4	59.4	6.2365	6.6795	5.1938	4.8278	5.8924	2.06	1.27	1.27	0
Tb927.8.2050	GDP-Man pyrophosphorylase	Glycans	169	386	305	289	93	140	174.3	107.5	99	204.5	7.1293	7.4454	6.7482	6.6294	7.676	1.3	0.68	0.68	0
Tb927.10.15490	GDP-mannose 4,6 dehydratase, putative	Glycans	65	154	182	160	23	53.8	69.5	64.1	54.8	50.6	5.7495	6.1189	6.0023	5.7761	5.6611	0.84	1.06	0.84	0
Tb927.11.10370	glycosyl hydrolase-like protein	Glycans	210	282	421	374	78	173.9	127.3	148.3	128.1	171.5	7.4421	6.9921	7.2124	7.0011	7.4221	0.86	0.74	0.74	0
Tb927.11.10670	glycosyl hydrolase, putative	Glycans	141	258	382	420	49	116.8	116.5	134.6	143.9	107.7	6.8679	6.8642	7.0725	7.1689	6.7509	0.81	1.08	0.81	0
Tb927.11.9990	glycosyl transferase-like protein	Glycans	80	165	161	136	7	66.3	74.5	56.7	46.6	15.4	6.0509	6.2192	5.8253	5.5423	3.9449	1.17	4.31	1.17	0
Tb927.6.1960	glycosyltransferase family 28 protein, putative	Glycans	85	189	183	175	12	70.4	85.3	64.5	59.9	26.4	6.1375	6.4145	6.0112	5.9045	4.7225	1.09	2.67	1.09	0
Tb927.11.3900	glycosyltransferase family-like protein, putative	Glycans	96	217	213	151	30	79.5	98	75.1	51.7	66	6.3129	6.6147	6.2307	5.6921	6.0444	1.06	1.2	1.06	0
Tb927.3.5660	GnT11 UDP-GlcNAc:α3-D-mannoside β1–2-N-acetylglucosaminyltransferase I	Glycans	90	171	319	370	66	74.5	77.2	112.4	126.7	145.1	6.2192	6.2705	6.8125	6.9853	7.1809	0.59	0.51	0.51	0
Tb927.7.2420	GSK3-long glycogen synthase kinase-3 alpha	Glycans	217	231	361	399	60	179.7	104.3	127.2	136.7	131.9	7.4894	6.7046	6.991	7.0949	7.0433	0.76	0.79	0.76	0
Tb927.10.13780	GSK3-short glycogen synthase kinase 3	Glycans	189	210	454	542	98	156.6	94.8	160	185.7	215.5	7.2909	6.5668	7.3219	7.5368	7.7515	0.51	0.44	0.44	0
Tb927.3.3580	lipophosphoglycan biosynthetic protein, putative (LPG3)=GRP94 ER chaperone	Glycans	472	824	1529	1584	231	391	372	538.8	542.6	507.9	8.611	8.5392	9.0736	9.0837	8.9884	0.69	0.73	0.69	0
Tb927.10.2570	lysosomal alpha-mannosidase precursor, putative	Glycans	324	652	1106	1180	234	268.4	294.4	389.7	404.2	514.4	8.0682	8.2016	8.6062	8.6589	9.0067	0.66	0.52	0.52	0
Tb927.7.300	N-acetylglucosaminyltransferase II GT15	Glycans	264	539	634	862	156	218.7	243.3	223.4	295.3	343	7.7728	7.9266	7.8035	8.206	8.4221	0.74	0.64	0.64	0
Tb927.6.1820	Phosphatidic acid phosphatase	Glycans	79	147	151	198	41	65.4	66.4	53.2	67.8	90.1	6.0312	6.0531	5.7334	6.0832	6.4935	0.96	0.73	0.73	0
Tb927.2.3370	UDP-Gal glycosyltransferase GT3	Glycans	93	265	431	624	90	77	119.6	151.9	213.7	197.9	6.2668	6.9021	7.247	7.7394	7.6286	0.36	0.39	0.36	0
Tb927.10.12290	UDP-Gal or UDP-GlcNAc-dependent glycosyltransferase, putative	Glycans	179	380	250	235	31	148.3	171.6	88.1	80.5	68.2	7.2124	7.4229	6.4611	6.3309	6.0917	1.68	2.17	1.68	0
Tb927.5.2760	UDP-Gal or UDP-GlcNAc-dependent glycosyltransferase, putative	Glycans	58	142	165	168	29	48	64.1	58.1	57.5	63.8	5.585	6.0023	5.8605	5.8455	5.9955	0.83	0.75	0.75	0
Tb927.9.800	UDP-Gal or UDP-GlcNAc-dependent glycosyltransferase, putative	Glycans	2	6	8	10	13	1.7	2.7	2.8	3.4	28.6	0.7655	1.433	1.4854	1.7655	4.8379	0.5	0.06	0.06	1
Tb927.9.16190	UDP-Gal or UDP-GlcNAc-dependent glycosyltransferase, putative	Glycans	0	0	5	11	1	0	0	1.8	3.8	2.2			0.848	1.926	1.1375	0	0	0	1
Tb927.4.5790	UDP-Gal or UDP-GlcNAc-dependent glycosyltransferase, putative	Glycans	0	0	2	1	12	0	0	0.7	0.3	26.4			-0.5146	-1.737	4.7225	0	0	0	1
Tb927.11.2730	UDP-galactose 4-epimerase (galE)	Glycans	161	226	308	310	76	133.4	102	108.5	106.2	167.1	7.0596	6.6724	6.7616	6.7306	7.3846	0.94	0.61	0.61	0
Tb927.10.13900	UDP-galactose transporter	Glycans	79	138	276	239	81	65.4	62.3	97.3	81.9	178.1	6.0312	5.9612	6.6044	6.3558	7.4765	0.64	0.35	0.35	0
Tb927.4.1640	UDP-galactose transporter, putative	Glycans	172	396	363	368	35	142.5	178.8	127.9	126.1	76.9	7.1548	7.4822	6.9989	6.9784	6.2649	1.11	1.85	1.11	0
Tb927.2.1780	UDP-GlcNAc:PI a1-6 GlcNAc-transferase	Glycans	77	170	128	140	10	63.8	76.7	45.1	48	22	5.9955	6.2612	5.4951	5.585	4.4594	1.33	2.9	1.33	0
Tb927.3.4570	UDP-GlcNAc:PI a1-6 GlcNAc-transferase, putative	Glycans	122	296	445	390	76	101.1	133.6	156.8	133.6	167.1	6.6596	7.0618	7.2928	7.0618	7.3846	0.64	0.61	0.61	0
Tb927.3.4630	UDP-glucose:glycoprotein glucosyltransferase, ER quality control	Glycans	310	662	791	805	136	256.8	298.9	278.7	275.7	299	8.0045	8.2235	8.1226	8.107	8.224	0.92	0.86	0.86	0
Tb927.11.2520	UDP-N-acetylglucosamine pyrophosphorylase, putative	Glycans	103	225	411	420	61	85.3	101.6	144.8	143.9	134.1	6.4145	6.6668	7.1779	7.1689	7.0672	0.59	0.64	0.59	0
Tb927.11.10450	UDP-N-acetylglucosamine-dolichyl-phosphate N-acetylglucosaminephosphotransferase, putative	Glycans	77	146	160	191	21	63.8	65.9	56.4	65.4	46.2	5.9955	6.0422	5.8176	6.0312	5.5298	0.98	1.38	0.98	0
Tb927.10.13130	UTP-glucose-1-phosphate uridylyltransferase 2, putative	Glycans	78	182	255	358	57	64.6	82.2	89.9	122.6	125.3	6.0135	6.3611	6.4902	6.9378	6.9692	0.53	0.52	0.52	0
Tb927.4.4050	glycosomal transporter (GAT1)	Glycosome	146	344	433	501	21	120.9	155.3	152.6	171.6	46.2	6.9177	7.2789	7.2536	7.4229	5.5298	0.7	2.62	0.7	0
Tb927.11.3130	glycosomal transporter (GAT2)	Glycosome	113	154	228	189	28	93.6	69.5	80.3	64.7	61.6	6.5484	6.1189	6.3273	6.0157	5.9449	0.87	1.13	0.87	0
Tb927.11.1070	glycosomal transporter (GAT3)	Glycosome	176	328	567	596	73	145.8	148.1	199.8	204.2	160.5	7.1878	7.2104	7.6424	7.6738	7.3264	0.71	0.91	0.71	0
Tb927.4.1250	PEX1 peroxisome biogenesis factor 1	Glycosome	136	295	308	314	44	112.7	133.2	108.5	107.6	96.7	6.8163	7.0575	6.7616	6.7495	6.5954	1.04	1.17	1.04	0
Tb927.3.2410	PEX10 peroxisome assembly protein	Glycosome	48	182	185	157	13	39.8	82.2	65.2	53.8	28.6	5.3147	6.3611	6.0268	5.7495	4.8379	0.61	1.39	0.61	0
Tb927.11.11520	PEX11 glycosomal membrane protein	Glycosome	499	845	349	382	43	413.3	381.5	123	130.9	94.5	8.691	8.5755	6.9425	7.0323	6.5622	2.91	4.04	2.91	0
Tb927.10.15850	PEX12 peroxisome assembly protein	Glycosome	117	239	253	177	35	96.9	107.9	89.2	60.6	76.9	6.5984	6.7536	6.479	5.9212	6.2649	1.09	1.26	1.09	0
Tb927.10.14720	PEX13 peroxin 13	Glycosome	207	347	493	487	38	171.5	156.7	173.7	166.8	83.5	7.4221	7.2919	7.4405	7.382	6.3837	0.9	1.88	0.9	0
Tb927.10.240	PEX14 peroxin 14	Glycosome	192	326	349	435	75	159	147.2	123	149	164.9	7.3129	7.2016	6.9425	7.2192	7.3654	0.99	0.89	0.89	0
Tb927.9.6450	PEX16, putative	Glycosome	128	238	305	261	27	106	107.4	107.5	89.4	59.4	6.7279	6.7469	6.7482	6.4822	5.8924	0.99	1.78	0.99	0
Tb927.9.12290	PEX19 Peroxin 19	Glycosome	169	374	434	532	62	140	168.8	152.9	182.2	136.3	7.1293	7.3992	7.2564	7.5094	7.0906	0.77	1.03	0.77	0
Tb927.3.2340	PEX2 peroxin-2,glycosome import protein (gim1)	Glycosome	93	140	265	244	35	77	63.2	93.4	83.6	76.9	6.2668	5.9819	6.5454	6.3854	6.2649	0.68	0.82	0.68	0
Tb927.5.1100	PEX5 peroxisome targeting signal 1 receptor	Glycosome	176	319	570	540	72	145.8	144	200.9	185	158.3	7.1878	7.1699	7.6503	7.5314	7.3065	0.72	0.91	0.72	0
Tb927.5.3920	PEX6 peroxisome assembly protein, AAA ATPase	Glycosome	142	158	155	137	44	117.6	71.3	54.6	46.9	96.7	6.8777	6.1558	5.7708	5.5515	6.5954	1.31	0.74	0.74	0
Tb927.3.3610	PEX7 peroxisomal targeting signal type 2 receptor	Glycosome	93	219	188	139	20	77	98.9	66.2	47.6	44	6.2668	6.6279	6.0488	5.5729	5.4594	1.16	1.75	1.16	0
Tb927.9.1720	PMP4 peroxisomal membrane protein 4, putative	Glycosome	84	209	79	96	6	69.6	94.4	27.8	32.9	13.2	6.121	6.5607	4.797	5.04	3.7225	2.12	5.27	2.12	0
Tb927.10.13290	ethanolamine phosphotransferase (EPT)	GPI.anchors	94	185	178	167	27	77.9	83.5	62.7	57.2	59.4	6.2836	6.3837	5.9704	5.8379	5.8924	1.24	1.31	1.24	0
Tb927.11.5070	ethanolamine phosphotransferase (EPT) (TbGPI13)	GPI.anchors	114	267	299	328	41	94.4	120.5	105.4	112.4	90.1	6.5607	6.9129	6.7197	6.8125	6.4935	0.84	1.05	0.84	0
Tb927.11.14140	ethanolamine-phosphate cytidylyltransferase (TbECT)	GPI.anchors	101	252	458	512	45	83.7	113.8	161.4	175.4	98.9	6.3872	6.8304	7.3345	7.4545	6.6279	0.48	0.85	0.48	0
Tb927.6.3300	GPI alpha-mannosyltransferase I (MT-I)	GPI.anchors	79	215	180	175	47	65.4	97.1	63.4	59.9	103.3	6.0312	6.6014	5.9864	5.9045	6.6907	1.03	0.63	0.63	0
Tb927.10.5560	GPI alpha-mannosyltransferase III (MT-III)	GPI.anchors	76	195	238	224	24	63	88	83.9	76.7	52.8	5.9773	6.4594	6.3906	6.2612	5.7225	0.75	1.19	0.75	0
Tb927.3.2610	GPI inositol deacylase 2 (GPIdeAc2)	GPI.anchors	130	308	226	214	70	107.7	139.1	79.6	73.3	153.9	6.7509	7.12	6.3147	6.1957	7.2658	1.35	0.7	0.7	0
Tb927.10.4780	GPI inositol deacylase precursor (GPIdeAc)	GPI.anchors	163	483	452	445	99	135	218.1	159.3	152.4	217.7	7.0768	7.7688	7.3156	7.2517	7.7662	0.85	0.62	0.62	0
Tb927.2.6000	GPI phospholipase C	GPI.anchors	480	580	1543	1959	327	397.6	261.9	543.7	671	718.9	8.6352	8.0329	9.0867	9.3902	9.4896	0.39	0.36	0.36	0
Tb927.10.210	GPI transamidase component GAA1	GPI.anchors	132	292	391	399	75	109.3	131.8	137.8	136.7	164.9	6.7721	7.0422	7.1064	7.0949	7.3654	0.79	0.66	0.66	0
Tb927.11.15760	GPI transamidase subunit Tta1 (TTA1)	GPI.anchors	112	265	360	360	39	92.8	119.6	126.9	123.3	85.7	6.5361	6.9021	6.9875	6.946	6.4212	0.73	1.08	0.73	0
Tb927.10.5080	GPI transamidase subunit Tta2	GPI.anchors	124	253	219	227	24	102.7	114.2	77.2	77.8	52.8	6.6823	6.8354	6.2705	6.2817	5.7225	1.32	1.95	1.32	0
Tb927.4.1920	GPI transamidase, putative (TbGPI16)	GPI.anchors	236	521	412	424	98	195.5	235.2	145.2	145.2	215.5	7.611	7.8777	7.1819	7.1819	7.7515	1.35	0.91	0.91	0
Tb927.10.13860	GPI-anchor transamidase subunit 8 (GPI8)	GPI.anchors	105	223	191	227	36	87	100.7	67.3	77.8	79.1	6.4429	6.6539	6.0725	6.2817	6.3056	1.12	1.1	1.1	0
Tb927.10.6140	GPI-GlcNAc transferase	GPI.anchors	76	153	164	178	19	63	69.1	57.8	61	41.8	5.9773	6.1106	5.853	5.9307	5.3854	1.03	1.51	1.03	0
Tb927.10.13160	mannosyltransferase-II (MT-II)	GPI.anchors	73	148	108	139	13	60.5	66.8	38.1	47.6	28.6	5.9189	6.0618	5.2517	5.5729	4.8379	1.27	2.12	1.27	0
Tb927.11.12080	N-acetyl-D-glucosaminylphosphatidylinositol de-N-acetylase (GPI12)	GPI.anchors	71	118	113	146	25	58.8	53.3	39.8	50	55	5.8777	5.7361	5.3147	5.6439	5.7814	1.07	0.97	0.97	0
Tb927.10.14240	N-myristoyltransferase (NMT)	GPI.anchors	110	209	252	299	26	91.1	94.4	88.8	102.4	57.2	6.5094	6.5607	6.4725	6.6781	5.8379	0.89	1.59	0.89	0
Tb927.10.13040	ACP4, GRESAG 4-like	GRESAG	130	260	530	452	65	107.7	117.4	186.8	154.8	142.9	6.7509	6.8753	7.5454	7.2743	7.1589	0.58	0.75	0.58	0
Tb927.11.13740	ACP5, GRESAG 4-like	GRESAG	151	387	608	579	108	125.1	174.7	214.2	198.3	237.4	6.9669	7.4487	7.7428	7.6315	7.8912	0.58	0.53	0.53	0
Tb927.11.1480	GRESAG 4, putative receptor-type adenylate cyclase	GRESAG	278	488	762	780	107	230.3	220.3	268.5	267.2	235.2	7.8474	7.7833	8.0688	8.0618	7.8777	0.82	0.94	0.82	0
Tb927.5.4540	GRESAG 4, putative receptor-type adenylate cyclase	GRESAG	407	496	699	646	113	337.1	223.9	246.3	221.3	248.4	8.397	7.8067	7.9443	7.7899	7.9565	0.91	0.9	0.9	0
Tb927.11.5940	GRESAG 4, putative receptor-type adenylate cyclase	GRESAG	201	248	491	373	143	166.5	112	173	127.8	314.4	7.3794	6.8074	7.4346	6.9977	8.2965	0.65	0.36	0.36	0
Tb927.10.2430	GRESAG 4, putative receptor-type adenylate cyclase	GRESAG	198	396	465	431	107	164	178.8	163.9	147.6	235.2	7.3576	7.4822	7.3567	7.2055	7.8777	1	0.7	0.7	0
Tb927.5.1450	GRESAG 4, putative receptor-type adenylate cyclase	GRESAG	170	273	325	330	73	140.8	123.3	114.5	113	160.5	7.1375	6.946	6.8392	6.8202	7.3264	1.08	0.77	0.77	0
Tb927.5.650	GRESAG 4, putative receptor-type adenylate cyclase	GRESAG	96	167	205	185	40	79.5	75.4	72.2	63.4	87.9	6.3129	6.2365	6.1739	5.9864	6.4578	1.04	0.86	0.86	0
Tb927.6.1520	aquaporin 3, putative (AQP1)	Ions	207	426	951	1146	226	171.5	192.3	335.1	392.6	496.9	7.4221	7.5872	8.3884	8.6169	8.9568	0.44	0.35	0.35	0
Tb927.9.15460	calcium motive p-type ATPase, putative	Ions	384	583	931	892	260	318.1	263.2	328.1	305.6	571.6	8.3133	8.04	8.358	8.2555	9.1589	0.8	0.46	0.46	0
Tb927.5.3400	calcium-translocating P-type ATPase, calcium pump	Ions	279	419	846	830	94	231.1	189.2	298.1	284.3	206.7	7.8524	7.5638	8.2197	8.1513	7.6914	0.63	0.92	0.63	0
Tb927.10.11620	calcium-transporting ATPase, putative	Ions	126	231	290	269	41	104.4	104.3	102.2	92.1	90.1	6.706	6.7046	6.6753	6.5251	6.4935	1.02	1.16	1.02	0
Tb927.9.4820	calcium/potassium channel (CAKC), putative	Ions	107	258	256	164	35	88.6	116.5	90.2	56.2	76.9	6.4692	6.8642	6.4951	5.8125	6.2649	0.98	1.15	0.98	0
Tb927.11.1910	cation transporter protein, putative	Ions	58	166	266	339	68	48	74.9	93.7	116.1	149.5	5.585	6.2269	6.55	6.8592	7.224	0.41	0.32	0.32	0
Tb927.9.5490	cation transporter, putative	Ions	110	231	372	412	68	91.1	104.3	131.1	141.1	149.5	6.5094	6.7046	7.0345	7.1406	7.224	0.65	0.61	0.61	0
Tb927.11.8990	cation transporter, putative	Ions	60	133	185	128	23	49.7	60	65.2	43.8	50.6	5.6352	5.9069	6.0268	5.4529	5.6611	0.76	0.98	0.76	0
Tb927.10.15940	cation transporter, putative	Ions	73	139	158	148	18	60.5	62.8	55.7	50.7	39.6	5.9189	5.9727	5.7996	5.6639	5.3074	1.09	1.53	1.09	0
Tb927.8.650	cation-transporting ATPase, putative	Ions	307	519	772	849	108	254.3	234.3	272	290.8	237.4	7.9904	7.8722	8.0875	8.1839	7.8912	0.81	0.99	0.81	0
Tb927.10.11680	chloride channel protein, putative	Ions	158	384	476	429	100	130.9	173.4	167.7	147	219.9	7.0323	7.438	7.3897	7.1997	7.7807	0.78	0.6	0.6	0
Tb927.9.8540	chloride channel protein, putative	Ions	149	285	311	344	57	123.4	128.7	109.6	117.8	125.3	6.9472	7.0079	6.7761	6.8802	6.9692	1.05	0.98	0.98	0
Tb927.11.16690	chloride channel protein, putative	Ions	158	397	258	215	30	130.9	179.2	90.9	73.6	66	7.0323	7.4854	6.5062	6.2016	6.0444	1.44	1.98	1.44	0
Tb927.11.1260	copper-transporting ATPase-like protein, putative	Ions	214	344	770	736	117	177.3	155.3	271.3	252.1	257.2	7.47	7.2789	8.0837	7.9779	8.0067	0.57	0.6	0.57	0
Tb927.1.580	phosphate-repressible phosphate permease, putative	Ions	147	529	316	368	103	121.8	238.8	111.3	126.1	226.4	6.9284	7.8997	6.7983	6.9784	7.8227	0.97	0.54	0.54	0
Tb927.10.16170	potassium voltage-gated channel, putative	Ions	83	155	218	225	31	68.8	70	76.8	77.1	68.2	6.1043	6.1293	6.263	6.2687	6.0917	0.89	1.01	0.89	0
Tb927.10.4300	Trk system potassium uptake protein (HKT1)	Ions	116	170	244	222	33	96.1	76.7	86	76	72.6	6.5865	6.2612	6.4263	6.2479	6.1819	0.89	1.06	0.89	0
Tb927.4.1610	VDAC-like	Ions	119	226	384	348	35	98.6	102	135.3	119.2	76.9	6.6235	6.6724	7.08	6.8972	6.2649	0.73	1.28	0.73	0
Tb927.2.2510	voltage-dependent anion-selective channel VDAC	Ions	359	614	614	681	125	297.4	277.2	216.4	233.3	274.8	8.2163	8.1148	7.7576	7.866	8.1022	1.19	1.01	1.01	0
Tb927.10.3980	Voltage-gated potassium channel domain. 3 TM domains	Ions	198	188	996	2281	274	164	84.9	351	781.3	602.4	7.3576	6.4077	8.4553	9.6097	9.2346	0.11	0.14	0.11	0
Tb927.11.15150	1-acyl-sn-glycerol-3-phosphate acyltransferase, putative	Lipids	110	208	433	536	63	91.1	93.9	152.6	183.6	138.5	6.5094	6.5531	7.2536	7.5204	7.1137	0.5	0.66	0.5	0
Tb927.6.1500	1-Alkyl-dihydroxyacetonephosphate synthase	Lipids	175	269	545	666	114	145	121.4	192	228.1	250.6	7.1799	6.9236	7.585	7.8335	7.9692	0.53	0.48	0.48	0
Tb927.10.660	2-oxoisovalerate dehydrogenase alpha subunit, putative	Lipids	104	194	284	324	40	86.1	87.6	100.1	111	87.9	6.4279	6.4529	6.6453	6.7944	6.4578	0.78	0.98	0.78	0
Tb927.10.4330	2-oxoisovalerate dehydrogenase beta subunit, mitochondrial precursor, putative	Lipids	79	166	168	165	22	65.4	74.9	59.2	56.5	48.4	6.0312	6.2269	5.8875	5.8202	5.5969	1.1	1.35	1.1	0
Tb927.7.5540	2,4-dienoyl-coa reductase-like protein	Lipids	99	185	213	234	49	82	83.5	75.1	80.2	107.7	6.3576	6.3837	6.2307	6.3255	6.7509	1.02	0.76	0.76	0
Tb927.10.4040	3-Ketosphinganine reductase	Lipids	119	349	433	549	102	98.6	157.6	152.6	188.1	224.2	6.6235	7.3001	7.2536	7.5554	7.8086	0.52	0.44	0.44	0
Tb927.2.5210	3-oxoacyl-ACP reductase, putative	Lipids	122	217	286	252	20	101.1	98	100.8	86.3	44	6.6596	6.6147	6.6554	6.4313	5.4594	0.97	2.23	0.97	0
Tb927.3.5630	3,2-trans-enoyl-CoA isomerase, mitochondrial precursor, putative	Lipids	61	171	232	221	31	50.5	77.2	81.8	75.7	68.2	5.6582	6.2705	6.354	6.2422	6.0917	0.62	0.74	0.62	0
Tb927.3.3340	3', 5'-cyclic nucleotide phosphodiesterase, putative (PDED)	Lipids	105	177	334	320	65	87	79.9	117.7	109.6	142.9	6.4429	6.3201	6.879	6.7761	7.1589	0.68	0.56	0.56	0
Tb927.8.2540	Acetyl-CoA acetyltransferase	Lipids	231	419	410	408	37	191.3	189.2	144.5	139.8	81.3	7.5797	7.5638	7.1749	7.1272	6.3452	1.31	2.33	1.31	0
Tb927.8.7100	acetyl-CoA carboxylase, putative	Lipids	913	1563	2289	2089	460	756.3	705.6	806.6	715.6	1011.3	9.5628	9.4627	9.6557	9.483	9.982	0.87	0.7	0.7	0
Tb927.1.4490	acetyltransferase, putative	Lipids	81	102	517	654	80	67.1	46	182.2	224	175.9	6.0682	5.5236	7.5094	7.8074	7.4586	0.21	0.26	0.21	0
Tb927.8.3310	acetyltransferase, putative	Lipids	123	205	447	427	37	101.9	92.6	157.5	146.3	81.3	6.671	6.5329	7.2992	7.1928	6.3452	0.59	1.14	0.59	0
Tb927.5.2280	acetyltransferase, putative	Lipids	101	201	351	394	56	83.7	90.7	123.7	135	123.1	6.3872	6.503	6.9507	7.0768	6.9437	0.62	0.68	0.62	0
Tb927.10.12830	acetyltransferase, putative	Lipids	71	147	143	143	23	58.8	66.4	50.4	49	50.6	5.8777	6.0531	5.6554	5.6147	5.6611	1.17	1.16	1.16	0
Tb927.3.860	acyl carrier protein, mitochondrial precursor, putative (ACP)	Lipids	294	685	378	517	68	243.5	309.3	133.2	177.1	149.5	7.9278	8.2729	7.0575	7.4684	7.224	1.37	1.63	1.37	0
Tb927.9.11900	acyl transferase-like protein	Lipids	75	174	191	189	31	62.1	78.6	67.3	64.7	68.2	5.9565	6.2965	6.0725	6.0157	6.0917	0.92	0.91	0.91	0
Tb927.4.2010	Acyl-CoA binding protein	Lipids	125	270	231	268	23	103.5	121.9	81.4	91.8	50.6	6.6935	6.9296	6.347	6.5204	5.6611	1.13	2.05	1.13	0
Tb927.11.12830	acyl-CoA binding protein, putative	Lipids	119	246	269	264	33	98.6	111.1	94.8	90.4	72.6	6.6235	6.7957	6.5668	6.4983	6.1819	1.04	1.36	1.04	0
Tb927.8.1420	acyl-CoA dehydrogenase, mitochondrial precursor, putative	Lipids	99	228	486	585	83	82	102.9	171.3	200.4	182.5	6.3576	6.6851	7.4204	7.6467	7.5118	0.41	0.45	0.41	0
Tb927.11.11780	acyl-CoA dehydrogenase, putative	Lipids	103	178	314	308	41	85.3	80.4	110.6	105.5	90.1	6.4145	6.3291	6.7892	6.7211	6.4935	0.73	0.89	0.73	0
Tb927.2.5020	acyl-CoA oxidase, putative	Lipids	150	310	431	460	64	124.2	140	151.9	157.6	140.7	6.9565	7.1293	7.247	7.3001	7.1365	0.79	0.88	0.79	0
Tb927.3.2030	acylphosphatase, putative	Lipids	20	88	43	48	19	16.6	39.7	15.2	16.4	41.8	4.0531	5.3111	3.926	4.0356	5.3854	1.01	0.4	0.4	0
Tb927.3.3360	acyltransferase, putative	Lipids	127	325	243	235	37	105.2	146.7	85.6	80.5	81.3	6.717	7.1967	6.4195	6.3309	6.3452	1.23	1.29	1.23	0
Tb927.3.4820	acyltransferase, putative	Lipids	74	138	139	127	15	61.3	62.3	49	43.5	33	5.9378	5.9612	5.6147	5.4429	5.0444	1.25	1.86	1.25	0
Tb927.2.3910	beta-ketoacyl synthase family protein, putative	Lipids	75	135	258	210	30	62.1	60.9	90.9	71.9	66	5.9565	5.9284	6.5062	6.1679	6.0444	0.67	0.92	0.67	0
Tb927.4.2560	Cardolipin synthase	Lipids	65	141	209	172	26	53.8	63.7	73.6	58.9	57.2	5.7495	5.9932	6.2016	5.8802	5.8379	0.73	0.94	0.73	0
Tb927.7.2250	carnitine O-palmitoyltransferase II, putative	Lipids	118	240	353	354	61	97.7	108.4	124.4	121.3	134.1	6.6103	6.7602	6.9588	6.9224	7.0672	0.79	0.73	0.73	0
Tb927.3.3900	carnitine O-palmitoyltransferase II, putative (CPT II)	Lipids	140	370	389	386	40	116	167	137.1	132.2	87.9	6.858	7.3837	7.0991	7.0466	6.4578	0.85	1.32	0.85	0
Tb927.8.590	carnitine O-palmitoyltransferase, putative	Lipids	82	145	183	190	25	67.9	65.5	64.5	65.1	55	6.0853	6.0334	6.0112	6.0246	5.7814	1.01	1.19	1.01	0
Tb927.7.220	CDP-diacylglycerol synthetase, putative	Lipids	152	310	632	734	271	125.9	140	222.7	251.4	595.8	6.9761	7.1293	7.799	7.9738	9.2187	0.5	0.21	0.21	0
Tb927.9.1610	CDP-diacylglycerol--inositol 3-phosphatidyltransferase, putative	Lipids	72	245	209	182	51	59.6	110.6	73.6	62.3	112.1	5.8972	6.7892	6.2016	5.9612	6.8086	0.81	0.53	0.53	0
Tb927.11.2090	choline kinase (EK1)	Lipids	120	217	373	341	42	99.4	98	131.4	116.8	92.3	6.6352	6.6147	7.0378	6.8679	6.5283	0.75	1.06	0.75	0
Tb927.10.8900	Choline phosphotransferase	Lipids	176	194	372	321	62	145.8	87.6	131.1	110	136.3	7.1878	6.4529	7.0345	6.7814	7.0906	0.67	0.64	0.64	0
Tb927.10.12810	Choline-phosphate cytidylyltransferase	Lipids	116	254	455	443	78	96.1	114.7	160.3	151.7	171.5	6.5865	6.8417	7.3246	7.2451	7.4221	0.6	0.56	0.56	0
Tb927.10.15970	class 3 lipase, putative,triacylglycerol lipase, putative	Lipids	68	127	151	115	32	56.3	57.3	53.2	39.4	70.4	5.8151	5.8405	5.7334	5.3001	6.1375	1.06	0.8	0.8	0
Tb927.3.1700	DAG acyltransferase	Lipids	104	138	133	143	25	86.1	62.3	46.9	49	55	6.4279	5.9612	5.5515	5.6147	5.7814	1.27	1.13	1.13	0
Tb927.8.5140	DAG kinase	Lipids	123	290	687	749	105	101.9	130.9	242.1	256.6	230.8	6.671	7.0323	7.9195	8.0034	7.8505	0.4	0.44	0.4	0
Tb927.10.7100	delta-4 fatty acid desaturase	Lipids	61	92	182	164	29	50.5	41.5	64.1	56.2	63.8	5.6582	5.375	6.0023	5.8125	5.9955	0.65	0.65	0.65	0
Tb927.11.2210	diacylglycerol acyltransferase, putative	Lipids	274	435	711	658	141	227	196.4	250.5	225.4	310	7.8265	7.6177	7.9687	7.8163	8.2761	0.78	0.63	0.63	0
Tb927.8.7730	Dihydroceramide synthase	Lipids	76	119	197	205	17	63	53.7	69.4	70.2	37.4	5.9773	5.7469	6.1169	6.1334	5.225	0.76	1.44	0.76	0
Tb927.4.3160	Dihydroxyacetonephosphate acyltransferase	Lipids	171	305	418	364	124	141.6	137.7	147.3	124.7	272.6	7.1457	7.1054	7.2026	6.9623	8.0906	0.93	0.51	0.51	0
Tb927.7.4160	Elongase 1	Lipids	124	245	332	358	28	102.7	110.6	117	122.6	61.6	6.6823	6.7892	6.8704	6.9378	5.9449	0.84	1.67	0.84	0
Tb927.7.4170	Elongase 2	Lipids	328	592	980	1220	297	271.7	267.3	345.3	417.9	653	8.0859	8.0623	8.4317	8.707	9.3509	0.64	0.41	0.41	0
Tb927.7.4180	Elongase 3	Lipids	217	398	379	366	116	179.7	179.7	133.5	125.4	255	7.4894	7.4894	7.0607	6.9704	7.9944	1.35	0.7	0.7	0
Tb927.5.4530	Elongase 4	Lipids	123	227	444	610	95	101.9	102.5	156.5	209	208.9	6.671	6.6795	7.29	7.7074	7.7067	0.49	0.49	0.49	0
Tb927.3.4850	enoyl-CoA hydratase, mitochondrial precursor, putative	Lipids	123	161	501	501	113	101.9	72.7	176.5	171.6	248.4	6.671	6.1839	7.4635	7.4229	7.9565	0.41	0.29	0.29	0
Tb927.2.4130	enoyl-CoA hydratase/Enoyl-CoA isomerase/3-hydroxyacyl-CoA dehydrogenase, putative	Lipids	179	356	563	659	139	148.3	160.7	198.4	225.7	305.6	7.2124	7.3282	7.6323	7.8183	8.2555	0.66	0.49	0.49	0
Tb927.11.16480	enoyl-CoA hydratase/isomerase family protein, putative	Lipids	54	168	121	139	11	44.7	75.8	42.6	47.6	24.2	5.4822	6.2441	5.4128	5.5729	4.5969	0.94	1.85	0.94	0
Tb927.4.4740	ER to golgi transport of GPI proteins OR Dihydroceramide synthase)	Lipids	101	234	453	433	66	83.7	105.6	159.6	148.3	145.1	6.3872	6.7225	7.3183	7.2124	7.1809	0.52	0.58	0.52	0
Tb927.5.1140	Ethanolamine kinase 1	Lipids	109	302	399	361	32	90.3	136.3	140.6	123.7	70.4	6.4967	7.0906	7.1355	6.9507	6.1375	0.64	1.28	0.64	0
Tb927.8.6000	fatty acid desaturase, putative	Lipids	380	670	1106	1078	206	314.8	302.5	389.7	369.3	452.9	8.2983	8.2408	8.6062	8.5286	8.823	0.78	0.67	0.67	0
Tb927.2.3080	fatty acid desaturase, putative,oleate desaturase, putative	Lipids	388	534	691	876	336	321.4	241.1	243.5	300.1	738.7	8.3282	7.9135	7.9278	8.2293	9.5288	0.8	0.33	0.33	0
Tb927.6.3000	fatty acid desaturase, putative,sphingolipid delta 4 desaturase, putative	Lipids	173	274	269	280	61	143.3	123.7	94.8	95.9	134.1	7.1629	6.9507	6.5668	6.5835	7.0672	1.29	0.92	0.92	0
Tb927.9.4190	fatty acyl CoA syntetase 1 (ACS1)	Lipids	239	408	657	696	98	198	184.2	231.5	238.4	215.5	7.6294	7.5251	7.8549	7.8972	7.7515	0.77	0.85	0.77	0
Tb927.8.5080	fatty-acid amide hydrolase 2, putative (H sapeiens E-115)	Lipids	84	199	377	390	79	69.6	89.8	132.8	133.6	173.7	6.121	6.4886	7.0531	7.0618	7.4405	0.52	0.4	0.4	0
Tb927.10.3100	Glycerol-3-phosphate acyltransferase	Lipids	105	144	292	306	26	87	65	102.9	104.8	57.2	6.4429	6.0224	6.6851	6.7115	5.8379	0.62	1.14	0.62	0
Tb927.11.20730	Glycerophosphodiester diesterase, putative	Lipids	89	204	208	253	31	73.7	92.1	73.3	86.7	68.2	6.2036	6.5251	6.1957	6.438	6.0917	0.85	1.08	0.85	0
Tb927.3.3030	hypothetical protein, conserved, START (lipid-binding) domain, homologue of human NP_006636.2, probable role in phosphlipid transfer across membranes	Lipids	75	174	246	260	37	62.1	78.6	86.7	89.1	81.3	5.9565	6.2965	6.438	6.4774	6.3452	0.7	0.76	0.7	0
Tb927.11.6390	hypothetical protein, conserved, START domain, possible phoshatidylcholine transfer protein	Lipids	84	248	335	369	53	69.6	112	118	126.4	116.5	6.121	6.8074	6.8826	6.9819	6.8642	0.55	0.6	0.55	0
Tb927.10.13680	lipase domain protein, putative,hypothetical protein	Lipids	79	198	168	144	30	65.4	89.4	59.2	49.3	66	6.0312	6.4822	5.8875	5.6235	6.0444	1.1	0.99	0.99	0
Tb927.1.2740	lipase-like protein, putative	Lipids	113	251	230	207	41	93.6	113.3	81	70.9	90.1	6.5484	6.824	6.3399	6.1477	6.4935	1.16	1.04	1.04	0
Tb927.8.7440	lipase, putative	Lipids	121	360	342	319	46	100.2	162.5	120.5	109.3	101.1	6.6467	7.3443	6.9129	6.7721	6.6596	0.83	0.99	0.83	0
Tb927.9.7740	lipid-like atypical dual specificity phosphatase, putative	Lipids	82	167	359	294	45	67.9	75.4	126.5	100.7	98.9	6.0853	6.2365	6.983	6.6539	6.6279	0.54	0.69	0.54	0
Tb927.11.580	lipid-like atypical dual specificity phosphatase, putative	Lipids	55	151	83	92	6	45.6	68.2	29.2	31.5	13.2	5.511	6.0917	4.8679	4.9773	3.7225	1.45	3.45	1.45	0
Tb927.7.5450	lipin, phosphatidic acid phosphatase	Lipids	150	196	565	641	67	124.2	88.5	199.1	219.6	147.3	6.9565	6.4676	7.6373	7.7787	7.2026	0.4	0.6	0.4	0
Tb927.10.15010	lipoic acid synthetase, mitochondrial precursor, putative	Lipids	113	277	265	237	32	93.6	125.1	93.4	81.2	70.4	6.5484	6.9669	6.5454	6.3434	6.1375	1	1.33	1	0
Tb927.10.3260	Long-chain-fatty-acid--CoA ligase 5, Acyl-CoA synthetase 5 (LACS 5)	Lipids	321	644	941	852	203	265.9	290.7	331.6	291.8	446.3	8.0547	8.1834	8.3733	8.1888	8.8019	0.8	0.6	0.6	0
Tb927.11.7530	long-chain-fatty-acid-CoA ligase, putative	Lipids	169	285	456	514	55	140	128.7	160.7	176.1	120.9	7.1293	7.0079	7.3282	7.4603	6.9177	0.73	1.06	0.73	0
Tb927.11.4490	long-chain-fatty-acid-CoA ligase, putative,acyl-CoA synthetase, putative,fatty acid thiokinase (long chain), putative	Lipids	124	208	480	462	71	102.7	93.9	169.1	158.3	156.1	6.6823	6.5531	7.4017	7.3065	7.2863	0.56	0.6	0.56	0
Tb927.8.6390	lysophospholipase, putative,alpha/beta hydrolase, putative (TbLysoPLA)	Lipids	398	434	437	459	70	329.7	195.9	154	157.2	153.9	8.365	7.614	7.2668	7.2965	7.2658	1.25	1.27	1.25	0
Tb927.8.8020	monoglyceride lipase, putative	Lipids	73	103	296	341	55	60.5	46.5	104.3	116.8	120.9	5.9189	5.5392	6.7046	6.8679	6.9177	0.4	0.38	0.38	0
Tb927.4.4360	monoglyceride lipase, putative	Lipids	75	124	236	230	37	62.1	56	83.2	78.8	81.3	5.9565	5.8074	6.3785	6.3001	6.3452	0.67	0.69	0.67	0
Tb927.5.3710	Neutral sphingomyelinase	Lipids	168	364	540	526	74	139.2	164.3	190.3	180.2	162.7	7.121	7.3602	7.5721	7.4935	7.3461	0.73	0.86	0.73	0
Tb927.8.1820	nonspecific lipid-transfer protein, putative,sterol carrier protein, putative	Lipids	79	171	138	106	16	65.4	77.2	48.6	36.3	35.2	6.0312	6.2705	5.6029	5.1819	5.1375	1.35	1.86	1.35	0
Tb927.9.7700	palmitoyl acyltransferase 1, putative	Lipids	107	214	202	186	34	88.6	96.6	71.2	63.7	74.7	6.4692	6.594	6.1538	5.9932	6.223	1.24	1.19	1.19	0
Tb927.3.2400	palmitoyl acyltransferase 10, putative	Lipids	65	162	116	109	30	53.8	73.1	40.9	37.3	66	5.7495	6.1918	5.354	5.2211	6.0444	1.32	0.82	0.82	0
Tb927.7.3350	palmitoyl acyltransferase 11, putative	Lipids	107	261	323	253	34	88.6	117.8	113.8	86.7	74.7	6.4692	6.8802	6.8304	6.438	6.223	0.78	1.19	0.78	0
Tb927.8.3400	palmitoyl acyltransferase 12, putative	Lipids	18	77	126	137	45	14.9	34.8	44.4	46.9	98.9	3.8972	5.121	5.4725	5.5515	6.6279	0.32	0.15	0.15	0
Tb927.10.10800	palmitoyl acyltransferase 2, TbPAT2	Lipids	76	169	164	133	22	63	76.3	57.8	45.6	48.4	5.9773	6.2536	5.853	5.511	5.5969	1.09	1.3	1.09	0
Tb927.10.690	palmitoyl acyltransferase 3, putative	Lipids	59	165	178	183	38	48.9	74.5	62.7	62.7	83.5	5.6118	6.2192	5.9704	5.9704	6.3837	0.78	0.59	0.59	0
Tb927.11.9070	palmitoyl acyltransferase 4, putative	Lipids	80	197	277	229	29	66.3	88.9	97.6	78.4	63.8	6.0509	6.4741	6.6088	6.2928	5.9955	0.68	1.04	0.68	0
Tb927.11.12650	palmitoyl acyltransferase 5, putative	Lipids	69	142	117	118	17	57.2	64.1	41.2	40.4	37.4	5.8379	6.0023	5.3646	5.3363	5.225	1.39	1.53	1.39	0
Tb927.11.4220	palmitoyl acyltransferase 6, putative	Lipids	79	175	182	153	26	65.4	79	64.1	52.4	57.2	6.0312	6.3038	6.0023	5.7115	5.8379	1.02	1.14	1.02	0
Tb927.11.6220	palmitoyl acyltransferase 7, putative	Lipids	103	187	269	272	24	85.3	84.4	94.8	93.2	52.8	6.4145	6.3992	6.5668	6.5423	5.7225	0.89	1.6	0.89	0
Tb927.11.7230	palmitoyl acyltransferase 8, putative	Lipids	65	132	164	133	22	53.8	59.6	57.8	45.6	48.4	5.7495	5.8972	5.853	5.511	5.5969	0.93	1.11	0.93	0
Tb927.11.7360	palmitoyl acyltransferase 9, putative	Lipids	91	164	151	162	15	75.4	74	53.2	55.5	33	6.2365	6.2095	5.7334	5.7944	5.0444	1.33	2.24	1.33	0
Tb927.8.480	phosphatidic acid phosphatase protein, putative	Lipids	153	91	197	201	18	126.7	41.1	69.4	68.9	39.6	6.9853	5.3611	6.1169	6.1064	5.3074	0.59	1.04	0.59	0
Tb927.10.13930	phosphatidic acid phosphatase, putative	Lipids	96	156	184	176	10	79.5	70.4	64.8	60.3	22	6.3129	6.1375	6.0179	5.9141	4.4594	1.09	3.2	1.09	0
Tb927.8.1720	Phosphatidylglycerophosphate synthase	Lipids	108	192	269	285	33	89.5	86.7	94.8	97.6	72.6	6.4838	6.438	6.5668	6.6088	6.1819	0.89	1.19	0.89	0
Tb927.9.10080	phosphatidylserine decarboxylase, putative	Lipids	51	149	106	94	8	42.2	67.3	37.4	32.2	17.6	5.3992	6.0725	5.225	5.009	4.1375	1.13	2.4	1.13	0
Tb927.1.4830	Phospholipase A1	Lipids	140	154	525	756	427	116	69.5	185	259	938.8	6.858	6.1189	7.5314	8.0168	9.8747	0.27	0.07	0.07	0
Tb927.9.12700	phospholipase A1, putative	Lipids	132	168	326	299	24	109.3	75.8	114.9	102.4	52.8	6.7721	6.2441	6.8442	6.6781	5.7225	0.66	1.44	0.66	0
Tb927.4.1510	phospholipid-translocating ATPase, putative	Lipids	167	295	441	463	66	138.3	133.2	155.4	158.6	145.1	7.1117	7.0575	7.2798	7.3092	7.1809	0.84	0.92	0.84	0
Tb927.6.3550	phospholipid-translocating P-type ATPase (flippase), putative	Lipids	370	534	698	746	139	306.5	241.1	246	255.5	305.6	8.2597	7.9135	7.9425	7.9972	8.2555	0.94	0.79	0.79	0
Tb927.11.3350	phospholipid-transporting ATPase 1-like protein, putative	Lipids	365	424	763	772	78	302.3	191.4	268.9	264.4	171.5	8.2398	7.5804	8.0709	8.0466	7.4221	0.71	1.12	0.71	0
Tb927.11.13000	phospholipid-transporting ATPase, putative	Lipids	283	473	782	863	75	234.4	213.5	275.6	295.6	164.9	7.8728	7.7381	8.1064	8.2075	7.3654	0.72	1.29	0.72	0
Tb927.11.13220	phospholipid:diacylglycerol acyltransferase-like protein	Lipids	139	349	589	624	95	115.1	157.6	207.5	213.7	208.9	6.8467	7.3001	7.697	7.7394	7.7067	0.54	0.55	0.54	0
Tb927.11.4700	prostaglandin f synthase	Lipids	330	492	344	365	45	273.3	222.1	121.2	125	98.9	8.0943	7.7951	6.9212	6.9658	6.6279	1.78	2.25	1.78	0
Tb927.7.3760	PS synthase/PS synthase-2	Lipids	123	191	320	350	153	101.9	86.2	112.8	119.9	336.4	6.671	6.4296	6.8176	6.9057	8.394	0.72	0.26	0.26	0
Tb927.4.1020	Serine palmitoyltransferase	Lipids	140	297	325	365	54	116	134.1	114.5	125	118.7	6.858	7.0672	6.8392	6.9658	6.8912	0.93	0.98	0.93	0
Tb927.10.4050	serine palmitoyltransferase, putative	Lipids	129	264	341	315	35	106.9	119.2	120.2	107.9	76.9	6.7401	6.8972	6.9093	6.7536	6.2649	0.89	1.39	0.89	0
Tb927.7.1240	Sphingosine kinase	Lipids	206	326	766	737	98	170.6	147.2	269.9	252.5	215.5	7.4145	7.2016	8.0763	7.9801	7.7515	0.55	0.68	0.55	0
Tb927.6.3630	Sphingosine-1-phosphate lyase	Lipids	109	199	270	289	28	90.3	89.8	95.1	99	61.6	6.4967	6.4886	6.5714	6.6294	5.9449	0.91	1.46	0.91	0
Tb927.11.8950	leucine rich repeat (TbLRRP1), in bilobe	LRRP	145	302	504	440	65	120.1	136.3	177.6	150.7	142.9	6.9081	7.0906	7.4725	7.2355	7.1589	0.68	0.84	0.68	0
Tb927.11.5190	leucine-rich repeat protein (LRRP)	LRRP	290	431	761	811	127	240.2	194.6	268.2	277.8	279.2	7.9081	7.6044	8.0672	8.1179	8.1252	0.7	0.7	0.7	0
Tb927.10.14460	leucine-rich repeat protein (LRRP)	LRRP	201	414	717	784	99	166.5	186.9	252.7	268.6	217.7	7.3794	7.5461	7.9813	8.0693	7.7662	0.62	0.76	0.62	0
Tb927.10.14610	leucine-rich repeat protein (LRRP)	LRRP	210	500	701	770	90	173.9	225.7	247	263.8	197.9	7.4421	7.8183	7.9484	8.0433	7.6286	0.66	0.88	0.66	0
Tb927.1.1030	leucine-rich repeat protein (LRRP)	LRRP	177	352	592	630	87	146.6	158.9	208.6	215.8	191.3	7.1957	7.312	7.7046	7.7536	7.5797	0.68	0.77	0.68	0
Tb927.4.1220	leucine-rich repeat protein (LRRP)	LRRP	494	1061	572	943	187	409.2	479	201.6	323	411.1	8.6767	8.9039	7.6554	8.3354	8.6833	1.27	1	1	0
Tb927.6.1160	leucine-rich repeat protein (LRRP)	LRRP	198	305	541	570	60	164	137.7	190.6	195.3	131.9	7.3576	7.1054	7.5744	7.6095	7.0433	0.71	1.04	0.71	0
Tb927.6.5030	leucine-rich repeat protein (LRRP)	LRRP	158	306	523	619	59	130.9	138.1	184.3	212	129.7	7.0323	7.1096	7.5259	7.7279	7.019	0.62	1.01	0.62	0
Tb927.11.5040	leucine-rich repeat protein (LRRP)	LRRP	140	245	451	504	57	116	110.6	158.9	172.6	125.3	6.858	6.7892	7.312	7.4313	6.9692	0.64	0.88	0.64	0
Tb927.1.4180	leucine-rich repeat protein (LRRP)	LRRP	84	206	450	557	168	69.6	93	158.6	190.8	369.3	6.121	6.5392	7.3092	7.5759	8.5286	0.36	0.19	0.19	0
Tb927.7.5600	leucine-rich repeat protein (LRRP)	LRRP	179	280	444	448	72	148.3	126.4	156.5	153.5	158.3	7.2124	6.9819	7.29	7.2621	7.3065	0.81	0.8	0.8	0
Tb927.7.7240	leucine-rich repeat protein (LRRP)	LRRP	109	276	439	442	65	90.3	124.6	154.7	151.4	142.9	6.4967	6.9612	7.2733	7.2422	7.1589	0.58	0.63	0.58	0
Tb927.9.12170	leucine-rich repeat protein (LRRP)	LRRP	117	142	403	377	75	96.9	64.1	142	129.1	164.9	6.5984	6.0023	7.1497	7.0123	7.3654	0.45	0.39	0.39	0
Tb927.11.6370	leucine-rich repeat protein (LRRP)	LRRP	182	376	375	350	44	150.8	169.8	132.1	119.9	96.7	7.2365	7.4077	7.0455	6.9057	6.5954	1.14	1.56	1.14	0
Tb927.9.14550	leucine-rich repeat protein (LRRP)	LRRP	112	233	346	423	91	92.8	105.2	121.9	144.9	200.1	6.5361	6.717	6.9296	7.1789	7.6446	0.64	0.46	0.46	0
Tb927.2.1380	leucine-rich repeat protein (LRRP)	LRRP	4	7	345	443	2	3.3	3.2	121.6	151.7	4.4	1.7225	1.6781	6.926	7.2451	2.1375	0.02	0.73	0.02	1
Tb927.3.1770	leucine-rich repeat protein (LRRP)	LRRP	125	222	344	333	35	103.5	100.2	121.2	114.1	76.9	6.6935	6.6467	6.9212	6.8342	6.2649	0.83	1.3	0.83	0
Tb927.10.14410	leucine-rich repeat protein (LRRP)	LRRP	158	325	343	378	50	130.9	146.7	120.9	129.5	109.9	7.0323	7.1967	6.9177	7.0168	6.78	1.01	1.19	1.01	0
Tb927.3.4730	leucine-rich repeat protein (LRRP)	LRRP	184	428	333	300	26	152.4	193.2	117.3	102.8	57.2	7.2517	7.594	6.8741	6.6837	5.8379	1.3	2.66	1.3	0
Tb927.7.7110	leucine-rich repeat protein (LRRP)	LRRP	154	363	325	283	103	127.6	163.9	114.5	96.9	226.4	6.9955	7.3567	6.8392	6.5984	7.8227	1.11	0.56	0.56	0
Tb927.11.11860	leucine-rich repeat protein (LRRP)	LRRP	125	261	317	273	28	103.5	117.8	111.7	93.5	61.6	6.6935	6.8802	6.8035	6.5469	5.9449	0.93	1.68	0.93	0
Tb927.10.3140	leucine-rich repeat protein (LRRP)	LRRP	117	209	298	312	46	96.9	94.4	105	106.9	101.1	6.5984	6.5607	6.7142	6.7401	6.6596	0.88	0.93	0.88	0
Tb927.3.2790	leucine-rich repeat protein (LRRP)	LRRP	174	237	292	324	59	144.1	107	102.9	111	129.7	7.1709	6.7415	6.6851	6.7944	7.019	0.96	0.82	0.82	0
Tb927.10.15260	leucine-rich repeat protein (LRRP)	LRRP	105	183	291	316	42	87	82.6	102.5	108.2	92.3	6.4429	6.3681	6.6795	6.7576	6.5283	0.76	0.89	0.76	0
Tb927.6.1940	leucine-rich repeat protein (LRRP)	LRRP	106	211	279	243	58	87.8	95.3	98.3	83.2	127.5	6.4561	6.5744	6.6191	6.3785	6.9944	0.89	0.69	0.69	0
Tb927.7.1430	leucine-rich repeat protein (LRRP)	LRRP	133	265	268	318	54	110.2	119.6	94.4	108.9	118.7	6.784	6.9021	6.5607	6.7669	6.8912	1.01	0.93	0.93	0
Tb927.7.2730	leucine-rich repeat protein (LRRP)	LRRP	93	181	268	338	28	77	81.7	94.4	115.8	61.6	6.2668	6.3523	6.5607	6.8555	5.9449	0.66	1.25	0.66	0
Tb927.11.16880	leucine-rich repeat protein (LRRP)	LRRP	137	248	255	236	35	113.5	112	89.9	80.8	76.9	6.8265	6.8074	6.4902	6.3363	6.2649	1.25	1.46	1.25	0
Tb927.11.860	leucine-rich repeat protein (LRRP)	LRRP	113	208	255	282	46	93.6	93.9	89.9	96.6	101.1	6.5484	6.5531	6.4902	6.594	6.6596	0.97	0.93	0.93	0
Tb927.10.5980	leucine-rich repeat protein (LRRP)	LRRP	81	147	247	267	89	67.1	66.4	87	91.5	195.7	6.0682	6.0531	6.4429	6.5157	7.6125	0.73	0.34	0.34	0
Tb927.3.580	leucine-rich repeat protein (LRRP)	LRRP	73	204	236	328	28	60.5	92.1	83.2	112.4	61.6	5.9189	6.5251	6.3785	6.8125	5.9449	0.54	0.98	0.54	0
Tb927.11.6760	leucine-rich repeat protein (LRRP)	LRRP	155	183	229	187	37	128.4	82.6	80.7	64.1	81.3	7.0045	6.3681	6.3345	6.0023	6.3452	1.02	1.02	1.02	0
Tb927.9.4850	leucine-rich repeat protein (LRRP)	LRRP	80	147	222	291	22	66.3	66.4	78.2	99.7	48.4	6.0509	6.0531	6.2891	6.6395	5.5969	0.66	1.37	0.66	0
Tb927.7.290	leucine-rich repeat protein (LRRP)	LRRP	117	230	211	228	22	96.9	103.8	74.4	78.1	48.4	6.5984	6.6977	6.2172	6.2873	5.5969	1.24	2	1.24	0
Tb927.9.14400	leucine-rich repeat protein (LRRP)	LRRP	58	125	210	243	44	48	56.4	74	83.2	96.7	5.585	5.8176	6.2095	6.3785	6.5954	0.58	0.5	0.5	0
Tb927.1.5030	leucine-rich repeat protein (LRRP)	LRRP	85	161	206	216	17	70.4	72.7	72.6	74	37.4	6.1375	6.1839	6.1819	6.2095	5.225	0.95	1.88	0.95	0
Tb927.11.1960	leucine-rich repeat protein (LRRP)	LRRP	119	265	193	280	16	98.6	119.6	68	95.9	35.2	6.6235	6.9021	6.0875	6.5835	5.1375	1.03	2.8	1.03	0
Tb927.10.1950	leucine-rich repeat protein (LRRP)	LRRP	75	135	173	197	19	62.1	60.9	61	67.5	41.8	5.9565	5.9284	5.9307	6.0768	5.3854	0.9	1.46	0.9	0
Tb927.11.3420	leucine-rich repeat protein (LRRP)	LRRP	91	186	159	151	35	75.4	84	56	51.7	76.9	6.2365	6.3923	5.8074	5.6921	6.2649	1.35	0.98	0.98	0
Tb927.3.1490	leucine-rich repeat protein (LRRP)	LRRP	112	141	148	165	36	92.8	63.7	52.2	56.5	79.1	6.5361	5.9932	5.706	5.8202	6.3056	1.13	0.81	0.81	0
Tb927.1.3320	leucine-rich repeat protein (LRRP)	LRRP	63	124	140	178	45	52.2	56	49.3	61	98.9	5.706	5.8074	5.6235	5.9307	6.6279	0.86	0.53	0.53	0
Tb927.11.4120	leucine-rich repeat protein (LRRP)	LRRP	106	191	133	144	20	87.8	86.2	46.9	49.3	44	6.4561	6.4296	5.5515	5.6235	5.4594	1.75	1.96	1.75	0
Tb927.10.9010	leucine-rich repeat protein (LRRP)	LRRP	55	153	121	130	19	45.6	69.1	42.6	44.5	41.8	5.511	6.1106	5.4128	5.4757	5.3854	1.02	1.09	1.02	0
Tb927.6.1490	leucine-rich repeat protein (LRRP)	LRRP	89	152	104	113	16	73.7	68.6	36.6	38.7	35.2	6.2036	6.1001	5.1938	5.2743	5.1375	1.77	1.95	1.77	0
Tb927.11.4060	leucine-rich repeat protein (LRRP)	LRRP	52	62	64	65	21	43.1	28	22.6	22.3	46.2	5.4296	4.8074	4.4983	4.479	5.5298	1.24	0.61	0.61	0
Tb927.11.12540	leucine-rich repeat protein (LRRP), putative	LRRP	250	357	542	560	97	207.1	161.2	191	191.8	213.3	7.6942	7.3327	7.5774	7.5835	7.7367	0.84	0.76	0.76	0
Tb927.1.1020	leucine-rich repeat-containing protein	LRRP	89	167	288	308	41	73.7	75.4	101.5	105.5	90.1	6.2036	6.2365	6.6653	6.7211	6.4935	0.7	0.82	0.7	0
Tb927.1.780	leucine-rich repeat-containing protein	LRRP	101	164	172	223	9	83.7	74	60.6	76.4	19.8	6.3872	6.2095	5.9212	6.2555	4.3074	0.97	3.74	0.97	0
Tb927.6.1550	POMP30 leucine-rich repeat protein (LRRP)	LRRP	66	106	228	186	34	54.7	47.9	80.3	63.7	74.7	5.7735	5.582	6.3273	5.9932	6.223	0.6	0.64	0.6	0
Tb927.3.2950	ribonuclease inhibitor- like protein LRRP-like	LRRP	155	298	483	502	71	128.4	134.5	170.2	172	156.1	7.0045	7.0715	7.4111	7.4263	7.2863	0.75	0.82	0.75	0
Tb927.11.7220	C-terminal BEACH domains, role in portein sorting, similar to yeast Bph1 but not top hit.	Lysosome	607	724	1191	1244	243	502.8	326.9	419.7	426.1	534.2	8.9738	8.3527	8.7132	8.735	9.0612	0.77	0.61	0.61	0
Tb927.8.2310	(H )-ATPase G subunit, putative	Lysosome	187	354	537	692	38	154.9	159.8	189.2	237	83.5	7.2752	7.3201	7.5638	7.8887	6.3837	0.65	1.86	0.65	0
Tb927.7.3320	ATG12/APG12, putative (ATG12)	Lysosome	31	89	60	63	23	25.7	40.2	21.1	21.6	50.6	4.6837	5.3291	4.3992	4.433	5.6611	1.19	0.51	0.51	0
Tb927.11.6960	ATG16/SAP18/CVT11/APG16, putative (ATG16)	Lysosome	97	238	356	357	55	80.3	107.4	125.4	122.3	120.9	6.3273	6.7469	6.9704	6.9343	6.9177	0.64	0.66	0.64	0
Tb927.11.16290	AUT2/APG4/ATG4 cysteine peptidase, putative (ATG4.1)	Lysosome	121	213	188	152	42	100.2	96.2	66.2	52.1	92.3	6.6467	6.588	6.0488	5.7032	6.5283	1.45	1.04	1.04	0
Tb927.6.1690	AUT2/APG4/ATG4 cysteine peptidase, putative, (ATG4.2)	Lysosome	54	110	169	230	8	44.7	49.7	59.6	78.8	17.6	5.4822	5.6352	5.8972	6.3001	4.1375	0.57	2.54	0.57	0
Tb927.10.12620	Golvesin-2 vacuolar protein	Lysosome	159	302	477	473	62	131.7	136.3	168.1	162	136.3	7.0411	7.0906	7.3932	7.3399	7.0906	0.78	0.97	0.78	0
Tb927.6.2430	hypothetical protein, conserved (ATG5)	Lysosome	89	168	258	261	32	73.7	75.8	90.9	89.4	70.4	6.2036	6.2441	6.5062	6.4822	6.1375	0.81	1.05	0.81	0
Tb927.5.1830	lysosomal/endosomal membrane protein p67 (p67)	Lysosome	952	2945	2626	2463	368	788.6	1329.6	925.3	843.7	809	9.6231	10.3768	9.8538	9.7206	9.66	0.85	0.97	0.85	0
Tb927.10.12980	methyltransferase, NOL1/NOP2/sun family	Lysosome	170	268	400	427	35	140.8	121	140.9	146.3	76.9	7.1375	6.9189	7.1385	7.1928	6.2649	0.83	1.57	0.83	0
Tb927.10.6150	neurobeachin/beige protein, putative	Lysosome	736	868	1323	1277	294	609.6	391.9	466.2	437.4	646.4	9.2517	8.6143	8.8648	8.7728	9.3363	0.84	0.61	0.61	0
Tb927.11.11160	Phosphate transporter (TbPho91	Lysosome	150	291	234	299	71	124.2	131.4	82.5	102.4	156.1	6.9565	7.0378	6.3663	6.6781	7.2863	1.21	0.8	0.8	0
Tb927.10.12450	SNARE 2.1 of T cruzi	Lysosome	68	131	152	159	28	56.3	59.1	53.6	54.5	61.6	5.8151	5.8851	5.7442	5.7682	5.9449	1.03	0.91	0.91	0
Tb927.4.1080	V-type ATPase, A subunit, putative	Lysosome	221	541	564	579	77	183.1	244.2	198.7	198.3	169.3	7.5165	7.9319	7.6344	7.6315	7.4034	0.92	1.08	0.92	0
Tb927.6.5050	V-type ATPase, C subunit, putative	Lysosome	76	217	280	330	55	63	98	98.7	113	120.9	5.9773	6.6147	6.625	6.8202	6.9177	0.56	0.52	0.52	0
Tb927.6.2770	vacuolar assembly protein vps41, putative	Lysosome	167	297	394	463	86	138.3	134.1	138.8	158.6	189.1	7.1117	7.0672	7.1169	7.3092	7.563	0.85	0.71	0.71	0
Tb927.8.2100	vacuolar ATP synthase 16 kDa proteolipid subunit, putative	Lysosome	138	340	254	309	54	114.3	153.5	89.5	105.8	118.7	6.8367	7.2621	6.4838	6.7252	6.8912	1.08	0.96	0.96	0
Tb927.11.11690	vacuolar ATP synthase subunit b, putative,v- ATPase B subunit,vacuolar proton pump B subunit	Lysosome	476	1368	976	902	103	394.3	617.6	343.9	309	226.4	8.6231	9.2705	8.4258	8.2715	7.8227	1.15	1.74	1.15	0
Tb927.10.14040	vacuolar ATP synthase subunit c, putative	Lysosome	233	567	536	656	100	193	256	188.9	224.7	219.9	7.5925	8	7.5615	7.8119	7.7807	0.86	0.88	0.86	0
Tb927.10.3760	vacuolar ATP synthase subunit d, putative	Lysosome	114	291	370	460	74	94.4	131.4	130.4	157.6	162.7	6.5607	7.0378	7.0268	7.3001	7.3461	0.6	0.58	0.58	0
Tb927.10.200	vacuolar ATP synthase, putative	Lysosome	415	904	743	842	152	343.8	408.1	261.8	288.4	334.2	8.4254	8.6728	8.0323	8.1719	8.3846	1.19	1.03	1.03	0
Tb927.5.550	vacuolar ATP synthase, putative	Lysosome	64	188	192	184	67	53	84.9	67.7	63	147.3	5.7279	6.4077	6.0811	5.9773	7.2026	0.78	0.36	0.36	0
Tb927.10.13020	vacuolar protein sorting complex subunit, putative,Vps16, putative	Lysosome	181	309	712	893	47	149.9	139.5	250.9	305.9	103.3	7.2279	7.1241	7.971	8.2569	6.6907	0.46	1.35	0.46	0
Tb927.10.2270	vacuolar protein sorting-associated protein 35, putative	Lysosome	198	534	843	897	154	164	241.1	297.1	307.3	338.6	7.3576	7.9135	8.2148	8.2635	8.4034	0.53	0.48	0.48	0
Tb927.3.3280	vacuolar protein sorting-associated protein 4, putative (VPS4)	Lysosome	111	301	408	400	52	91.9	135.9	143.8	137	114.3	6.522	7.0864	7.1679	7.098	6.8367	0.64	0.8	0.64	0
Tb927.10.6780	vacuolar protein sorting-associated protein 45, putative (VPS45)	Lysosome	109	273	460	425	79	90.3	123.3	162.1	145.6	173.7	6.4967	6.946	7.3407	7.1859	7.4405	0.56	0.52	0.52	0
Tb927.5.1300	vacuolar proton translocating ATPase subunit A, putative	Lysosome	189	408	370	390	37	156.6	184.2	130.4	133.6	81.3	7.2909	7.5251	7.0268	7.0618	6.3452	1.17	1.93	1.17	0
Tb927.3.2280	vacuolar sorting protein 33 , putative	Lysosome	121	210	424	517	53	100.2	94.8	149.4	177.1	116.5	6.6467	6.5668	7.223	7.4684	6.8642	0.54	0.81	0.54	0
Tb927.11.14290	vacuolar sorting protein, putative	Lysosome	60	208	170	201	35	49.7	93.9	59.9	68.9	76.9	5.6352	6.5531	5.9045	6.1064	6.2649	0.72	0.65	0.65	0
Tb927.11.10010	vacuolar sorting-associated protein-like, putative	Lysosome	107	149	283	289	12	88.6	67.3	99.7	99	26.4	6.4692	6.0725	6.6395	6.6294	4.7225	0.68	2.55	0.68	0
Tb927.11.10740	vacuolar sorting-associated protein-like, putative	Lysosome	94	196	122	141	15	77.9	88.5	43	48.3	33	6.2836	6.4676	5.4263	5.594	5.0444	1.61	2.36	1.61	0
Tb927.4.1400	vacuolar transport protein 4A, putative	Lysosome	62	113	176	126	28	51.4	51	62	43.2	61.6	5.6837	5.6724	5.9542	5.433	5.9449	0.82	0.83	0.82	0
Tb927.7.3900	vacuolar transporter chaperone, putative, ER by IFA	Lysosome	107	264	173	266	74	88.6	119.2	61	91.1	162.7	6.4692	6.8972	5.9307	6.5094	7.3461	0.97	0.54	0.54	0
Tb927.11.7480	vacuolar type h ATPase subunit, putative	Lysosome	175	489	351	363	80	145	220.8	123.7	124.3	175.9	7.1799	7.7866	6.9507	6.9577	7.4586	1.17	0.82	0.82	0
Tb927.4.4380	vacuolar-type proton translocating pyrophosphatase 1, putative (PPase1)	Lysosome	525	1488	1344	1365	164	434.9	671.8	473.6	467.6	360.6	8.7645	9.3919	8.8875	8.8691	8.4943	0.92	1.21	0.92	0
Tb927.11.1470	65 kDa invariant surface glycoprotein (ISG65)	Membrane.protein	167	435	925	911	140	138.3	196.4	325.9	312.1	307.8	7.1117	7.6177	8.3483	8.2859	8.2658	0.42	0.45	0.42	0
Tb927.10.10250	EP2 procyclin (EP2)	Membrane.protein	819	742	2283	1900	178	678.4	335	804.5	650.8	391.3	9.406	8.388	9.6519	9.3461	8.6121	0.42	0.86	0.42	0
Tb927.3.2580	Fam5 cell surface protein	Membrane.protein	20	52	22	26	10	16.6	23.5	7.8	8.9	22	4.0531	4.5546	2.9635	3.1538	4.4594	1.87	0.75	0.75	0
Tb927.6.510	GPEET2 procyclin	Membrane.protein	192	227	452	436	43	159	102.5	159.3	149.4	94.5	7.3129	6.6795	7.3156	7.223	6.5622	0.64	1.08	0.64	0
Tb927.8.930	hypothetical protein, conserved, predicted GPI anchor	Membrane.protein	394	1036	1034	1178	74	326.4	467.7	364.4	403.5	162.7	8.3505	8.8694	8.5094	8.6564	7.3461	0.81	2.01	0.81	0
Tb927.10.990	hypothetical protein, conserved, predicted GPI anchor	Membrane.protein	96	220	470	565	29	79.5	99.3	165.6	193.5	63.8	6.3129	6.6337	7.3716	7.5962	5.9955	0.41	1.25	0.41	0
Tb927.8.1250	hypothetical protein, conserved, predicted GPI anchor	Membrane.protein	128	362	442	425	53	106	163.4	155.7	145.6	116.5	6.7279	7.3523	7.2826	7.1859	6.8642	0.68	0.91	0.68	0
Tb927.4.1110	hypothetical protein, conserved, predicted GPI anchor	Membrane.protein	107	269	376	404	47	88.6	121.4	132.5	138.4	103.3	6.4692	6.9236	7.0498	7.1127	6.6907	0.64	0.86	0.64	0
Tb927.9.11640	hypothetical protein, conserved, predicted GPI anchor	Membrane.protein	58	80	120	146	23	48	36.1	42.3	50	50.6	5.585	5.1739	5.4026	5.6439	5.6611	0.72	0.71	0.71	0
Tb927.9.13310	hypothetical protein, conserved, predicted GPI anchor	Membrane.protein	48	71	114	117	31	39.8	32.1	40.2	40.1	68.2	5.3147	5.0045	5.3291	5.3255	6.0917	0.8	0.47	0.47	0
Tb927.9.7950	hypothetical protein, conserved, predicted GPI anchor	Membrane.protein	38	69	53	94	10	31.5	31.2	18.7	32.2	22	4.9773	4.9635	4.225	5.009	4.4594	0.97	1.42	0.97	0
Tb927.9.7900	hypothetical protein, conserved, predicted GPI anchor	Membrane.protein	13	22	17	20	3	10.8	9.9	6	6.9	6.6	3.433	3.3074	2.585	2.7866	2.7225	1.43	1.5	1.43	0
Tb927.9.7850	hypothetical protein, conserved, predicted GPI anchor	Membrane.protein	13	20	12	16	3	10.8	9	4.2	5.5	6.6	3.433	3.1699	2.0704	2.4594	2.7225	1.64	1.36	1.36	0
Tb927.9.7870	hypothetical protein, conserved, predicted GPI anchor	Membrane.protein	11	18	12	15	3	9.1	8.1	4.2	5.1	6.6	3.1859	3.0179	2.0704	2.3505	2.7225	1.59	1.23	1.23	0
Tb927.11.12270	hypothetical protein, conserved,drug resistence protein, putative	Membrane.protein	101	195	191	207	28	83.7	88	67.3	70.9	61.6	6.3872	6.4594	6.0725	6.1477	5.9449	1.18	1.36	1.18	0
Tb927.11.8720	major surface protease gp63, putative,surface protease homologue	Membrane.protein	102	221	310	335	31	84.5	99.8	109.2	114.8	68.2	6.4009	6.641	6.7708	6.843	6.0917	0.74	1.24	0.74	0
Tb927.11.7410	MSP-A, putative	Membrane.protein	123	350	573	573	85	101.9	158	201.9	196.3	186.9	6.671	7.3038	7.6575	7.6169	7.5461	0.5	0.55	0.5	0
Tb927.8.1620	MSP-B, putative	Membrane.protein	540	1249	1075	1008	200	447.3	563.9	378.8	345.3	439.7	8.8051	9.1393	8.5653	8.4317	8.7804	1.18	1.02	1.02	0
Tb927.10.2410	MSP-C, putative	Membrane.protein	226	410	743	739	89	187.2	185.1	261.8	253.1	195.7	7.5484	7.5322	8.0323	7.9836	7.6125	0.71	0.95	0.71	0
Tb927.11.5970	phosphoinositide-specific phospholipase C, calcium-regulated	Membrane.protein	96	167	277	322	53	79.5	75.4	97.6	110.3	116.5	6.3129	6.2365	6.6088	6.7853	6.8642	0.68	0.65	0.65	0
Tb927.10.11220	procyclic form surface glycoprotein (PSSA-2)	Membrane.protein	105	250	327	270	64	87	112.9	115.2	92.5	140.7	6.4429	6.8189	6.848	6.5314	7.1365	0.76	0.62	0.62	0
Tb927.11.15490	Tb-291 membrane associated protein, putative	Membrane.protein	727	1491	639	1214	65	602.2	673.1	225.2	415.9	142.9	9.2341	9.3947	7.8151	8.7001	7.1589	1.45	4.21	1.45	0
Tb927.3.5530	Tb-292 membrane associated protein	Membrane.protein	981	1583	1831	2391	332	812.6	714.7	645.2	819	729.9	9.6664	9.4812	9.3336	9.6777	9.5116	0.87	0.98	0.87	0
Tb927.5.440	trans sialidase, putative	Membrane.protein	104	193	215	212	23	86.1	87.1	75.8	72.6	50.6	6.4279	6.4446	6.2441	6.1819	5.6611	1.14	1.7	1.14	0
Tb927.7.6850	trans-sialidase (TbTS)	Membrane.protein	247	368	462	553	109	204.6	166.1	162.8	189.4	239.6	7.6767	7.3759	7.347	7.5653	7.9045	0.88	0.69	0.69	0
Tb927.11.11410	trans-sialidase, putative	Membrane.protein	114	205	274	312	35	94.4	92.6	96.6	106.9	76.9	6.5607	6.5329	6.594	6.7401	6.2649	0.87	1.2	0.87	0
Tb927.2.5280	trans-sialidase, putative (30J2.90)	Membrane.protein	165	378	515	587	83	136.7	170.7	181.5	201.1	182.5	7.0949	7.4153	7.5038	7.6518	7.5118	0.68	0.75	0.68	0
Tb927.8.7340	trans-sialidase, putative,neuraminidase, putative	Membrane.protein	80	129	122	137	35	66.3	58.2	43	46.9	76.9	6.0509	5.8629	5.4263	5.5515	6.2649	1.24	0.76	0.76	0
Tb927.9.9660	Archaic translocase of the outer mitochondrial membrane ATOM	Mito.biogenesis	106	213	216	199	39	87.8	96.2	76.1	68.2	85.7	6.4561	6.588	6.2498	6.0917	6.4212	1.15	1.02	1.02	0
Tb927.10.6510	chaperonin HSP60, mitochondrial precursor	Mito.biogenesis	2027	3821	4326	4369	269	1679	1725.1	1524.4	1496.6	591.4	10.7134	10.7525	10.574	10.5475	9.208	1.1	2.84	1.1	0
Tb927.11.15040	chaperonin HSP60, mitochondrial precursor	Mito.biogenesis	173	294	680	702	109	143.3	132.7	239.6	240.5	239.6	7.1629	7.052	7.9045	7.9099	7.9045	0.55	0.55	0.55	0
Tb927.6.4090	chaperonin HSP60, mitochondrial precursor	Mito.biogenesis	131	311	426	364	41	108.5	140.4	150.1	124.7	90.1	6.7616	7.1334	7.2298	6.9623	6.4935	0.72	1.2	0.72	0
Tb927.6.3740	heat shock 70 kDa protein, mitochondrial precursor, putative	Mito.biogenesis	1498	2740	5627	5580	492	1240.8	1237	1982.8	1911.4	1081.7	10.2771	10.2726	10.9533	10.9004	10.0791	0.62	1.14	0.62	0
Tb927.11.7780	Mitochondrial import receptor subunit ATOM46 (ATOM46)	Mito.biogenesis	125	188	296	304	44	103.5	84.9	104.3	104.1	96.7	6.6935	6.4077	6.7046	6.7018	6.5954	0.81	0.88	0.81	0
Tb927.10.4590	mitochondrial inner membrane signal peptidase, putative	Mito.biogenesis	38	93	112	94	4	31.5	42	39.5	32.2	8.8	4.9773	5.3923	5.3038	5.009	3.1375	0.8	3.58	0.8	0
Tb927.2.4110	mitochondrial processing peptidase alpha subunit MPP alpha	Mito.biogenesis	135	249	310	359	60	111.8	112.4	109.2	123	131.9	6.8048	6.8125	6.7708	6.9425	7.0433	0.91	0.85	0.85	0
Tb927.9.4520	mitochondrial processing peptidase, beta subunit, MMPbeta	Mito.biogenesis	137	278	239	286	28	113.5	125.5	84.2	98	61.6	6.8265	6.9715	6.3957	6.6147	5.9449	1.16	1.84	1.16	0
Tb927.6.1680	Mitochondrial tRNA import	Mito.biogenesis	126	211	222	183	24	104.4	95.3	78.2	62.7	52.8	6.706	6.5744	6.2891	5.9704	5.7225	1.22	1.8	1.22	0
Tb927.9.11220	Mitochondrial tRNA import	Mito.biogenesis	120	164	161	176	22	99.4	74	56.7	60.3	48.4	6.6352	6.2095	5.8253	5.9141	5.5969	1.23	1.53	1.23	0
Tb927.11.600	Mitochondrial tRNA import	Mito.biogenesis	134	292	130	117	16	111	131.8	45.8	40.1	35.2	6.7944	7.0422	5.5173	5.3255	5.1375	2.42	3.15	2.42	0
Tb927.9.7830	mitochondrial tRNA import complex, putative	Mito.biogenesis	128	272	267	316	21	106	122.8	94.1	108.2	46.2	6.7279	6.9402	6.5561	6.7576	5.5298	0.98	2.29	0.98	0
Tb927.5.960	MSP1, Mitochondrial protein involved in sorting of proteins in the mitochondria, putative	Mito.biogenesis	127	236	323	344	50	105.2	106.5	113.8	117.8	109.9	6.717	6.7347	6.8304	6.8802	6.78	0.89	0.96	0.89	0
Tb927.11.13290	TIM17	Mito.biogenesis	111	295	262	299	76	91.9	133.2	92.3	102.4	167.1	6.522	7.0575	6.5283	6.6781	7.3846	0.9	0.55	0.55	0
Tb927.8.1740	TIM62	Mito.biogenesis	117	226	183	177	27	96.9	102	64.5	60.6	59.4	6.5984	6.6724	6.0112	5.9212	5.8924	1.5	1.63	1.5	0
Tb927.3.4380	Tob55, SAM50	Mito.biogenesis	82	158	227	315	25	67.9	71.3	80	107.9	55	6.0853	6.1558	6.3219	6.7536	5.7814	0.63	1.23	0.63	0
Tb927.11.6890	DNA repair and recombination helicase protein PIF1	Mito.DNA	176	255	271	245	52	145.8	115.1	95.5	83.9	114.3	7.1878	6.8467	6.5774	6.3906	6.8367	1.21	1.01	1.01	0
Tb927.11.6900	DNA repair and recombination helicase protein PIF2	Mito.DNA	122	180	269	246	51	101.1	81.3	94.8	84.3	112.1	6.6596	6.3452	6.5668	6.3975	6.8086	0.86	0.73	0.73	0
Tb927.11.11800	DNA repair and recombination helicase protein PIF3	Mito.DNA	124	228	289	268	71	102.7	102.9	101.8	91.8	156.1	6.6823	6.6851	6.6696	6.5204	7.2863	1.01	0.66	0.66	0
Tb927.11.14790	DNA repair and recombination helicase protein PIF4	Mito.DNA	97	181	259	239	46	80.3	81.7	91.3	81.9	101.1	6.3273	6.3523	6.5125	6.3558	6.6596	0.88	0.79	0.79	0
Tb927.8.3560	DNA repair and recombination helicase protein PIF5	Mito.DNA	168	283	448	492	124	139.2	127.8	157.9	168.5	272.6	7.121	6.9977	7.3029	7.3966	8.0906	0.76	0.47	0.47	0
Tb927.10.910	DNA repair and recombination helicase protein PIF6	Mito.DNA	143	226	298	276	37	118.5	102	105	94.5	81.3	6.8887	6.6724	6.7142	6.5622	6.3452	0.97	1.25	0.97	0
Tb927.8.700	DNA repair and recombination helicase protein PIF7	Mito.DNA	133	230	381	425	91	110.2	103.8	134.3	145.6	200.1	6.784	6.6977	7.0693	7.1859	7.6446	0.71	0.52	0.52	0
Tb927.7.1000	DNA repair and recombination helicase protein PIF8	Mito.DNA	115	213	400	361	32	95.3	96.2	140.9	123.7	70.4	6.5744	6.588	7.1385	6.9507	6.1375	0.68	1.35	0.68	0
Tb927.10.1900	DNA topoisomerase IA, putative	Mito.DNA	107	175	217	309	54	88.6	79	76.5	105.8	118.7	6.4692	6.3038	6.2574	6.7252	6.8912	0.75	0.67	0.67	0
Tb927.9.5590	DNA topoisomerase ii (TOP2)	Mito.DNA	209	328	530	533	83	173.1	148.1	186.8	182.6	182.5	7.4355	7.2104	7.5454	7.5125	7.5118	0.79	0.81	0.79	0
Tb927.11.16400	kinetoplast DNA-associated protein, putative	Mito.DNA	231	313	646	704	79	191.3	141.3	227.6	241.2	173.7	7.5797	7.1426	7.8304	7.9141	7.4405	0.59	0.81	0.59	0
Tb927.10.8890	kinetoplast DNA-associated protein, putative	Mito.DNA	41	70	403	510	52	34	31.6	142	174.7	114.3	5.0875	4.9819	7.1497	7.4487	6.8367	0.18	0.28	0.18	0
Tb927.10.8950	kinetoplast DNA-associated protein, putative	Mito.DNA	134	300	268	337	39	111	135.4	94.4	115.4	85.7	6.7944	7.0811	6.5607	6.8505	6.4212	0.96	1.3	0.96	0
Tb927.5.2780	mitochondrial DNA polymerase beta	Mito.DNA	111	164	323	307	65	91.9	74	113.8	105.2	142.9	6.522	6.2095	6.8304	6.717	7.1589	0.65	0.52	0.52	0
Tb927.4.2950	mitochondrial DNA polymerase I protein A, putative	Mito.DNA	143	270	459	576	84	118.5	121.9	161.7	197.3	184.7	6.8887	6.9296	7.3372	7.6242	7.529	0.6	0.64	0.6	0
Tb927.11.4690	mitochondrial DNA polymerase I protein B (POLIB)	Mito.DNA	255	395	392	374	72	211.2	178.3	138.1	128.1	158.3	7.7225	7.4782	7.1096	7.0011	7.3065	1.29	1.13	1.13	0
Tb927.7.3990	mitochondrial DNA polymerase I protein C (TbPOL1C)	Mito.DNA	318	378	458	438	103	263.4	170.7	161.4	150	226.4	8.0411	7.4153	7.3345	7.2288	7.8227	1.06	0.75	0.75	0
Tb927.11.3260	mitochondrial DNA polymerase I protein D, putative (POLID)	Mito.DNA	345	502	724	767	150	285.8	226.6	255.1	262.7	329.8	8.1589	7.824	7.9949	8.0373	8.3654	0.86	0.69	0.69	0
Tb927.8.2550	mitochondrial DNA primase (PRI1)	Mito.DNA	163	206	449	469	53	135	93	158.2	160.7	116.5	7.0768	6.5392	7.3056	7.3282	6.8642	0.58	0.8	0.58	0
Tb927.10.340	mitochondrial structure specific endonuclease I (SSE-1), putative	Mito.DNA	68	125	147	114	22	56.3	56.4	51.8	39.1	48.4	5.8151	5.8176	5.6949	5.2891	5.5969	1.09	1.16	1.09	0
Tb927.1.4010	TbPRI2, primase 2, kDNA replication	Mito.DNA	193	252	435	309	78	159.9	113.8	153.3	105.8	171.5	7.321	6.8304	7.2602	6.7252	7.4221	0.74	0.66	0.66	0
Tb927.5.1060	Complex III beta-MMP subunit of cytochrom b/c1 complex	Mito.e.transport	109	216	245	195	25	90.3	97.5	86.3	66.8	55	6.4967	6.6073	6.4313	6.0618	5.7814	1.05	1.64	1.05	0
Tb927.11.16220	Complex III cytochrome b/c complex	Mito.e.transport	61	104	100	137	26	50.5	47	35.2	46.9	57.2	5.6582	5.5546	5.1375	5.5515	5.8379	1	0.82	0.82	0
Tb927.10.4280	Complex III cytochrome b/c complex, Cytochrome bd ubiquinol oxidase, 14kDa subunit	Mito.e.transport	59	116	154	139	18	48.9	52.4	54.3	47.6	39.6	5.6118	5.7115	5.7629	5.5729	5.3074	0.9	1.23	0.9	0
Tb927.8.1890	Complex III cytochrome c1, cytochrome b/c complex	Mito.e.transport	104	198	208	192	18	86.1	89.4	73.3	65.8	39.6	6.4279	6.4822	6.1957	6.04	5.3074	1.17	2.17	1.17	0
Tb927.11.3980	Complex III subunit of cytochrom b/c1 complex alpha-MMP	Mito.e.transport	99	217	273	250	27	82	98	96.2	85.6	59.4	6.3576	6.6147	6.588	6.4195	5.8924	0.85	1.38	0.85	0
Tb927.11.12040	component of cytochrome c oxidase complex	Mito.e.transport	65	141	233	292	85	53.8	63.7	82.1	100	186.9	5.7495	5.9932	6.3593	6.6439	7.5461	0.54	0.29	0.29	0
Tb927.11.16510	cytochrome b/c1 complex component, putative	Mito.e.transport	97	195	98	89	7	80.3	88	34.5	30.5	15.4	6.3273	6.4594	5.1085	4.9307	3.9449	2.33	5.21	2.33	0
Tb927.11.13650	cytochrome b5, putative (CYB5)	Mito.e.transport	63	105	135	133	22	52.2	47.4	47.6	45.6	48.4	5.706	5.5668	5.5729	5.511	5.5969	1	0.98	0.98	0
Tb927.11.6640	cytochrome b5, putative (CYB5)	Mito.e.transport	36	97	80	104	27	29.8	43.8	28.2	35.6	59.4	4.8972	5.4529	4.8176	5.1538	5.8924	0.84	0.5	0.5	0
Tb927.3.3470	cytochrome b5, putative (CYB5)	Mito.e.transport	25	79	62	52	11	20.7	35.7	21.8	17.8	24.2	4.3716	5.1579	4.4463	4.1538	4.5969	0.95	0.86	0.86	0
Tb927.8.5120	cytochrome c	Mito.e.transport	33	81	421	614	37	27.3	36.6	148.3	210.3	81.3	4.7708	5.1938	7.2124	7.7163	6.3452	0.13	0.34	0.13	0
Tb927.9.8680	cytochrome c oxidase assembly factor, putative	Mito.e.transport	92	206	136	117	20	76.2	93	47.9	40.1	44	6.2517	6.5392	5.582	5.3255	5.4594	1.59	1.73	1.59	0
Tb927.1.1580	cytochrome c oxidase assembly factor, SCO1/2, putative	Mito.e.transport	58	105	206	205	52	48	47.4	72.6	70.2	114.3	5.585	5.5668	6.1819	6.1334	6.8367	0.65	0.41	0.41	0
Tb927.10.3120	cytochrome c oxidase assembly protein, putative	Mito.e.transport	70	158	206	257	18	58	71.3	72.6	88	39.6	5.858	6.1558	6.1819	6.4594	5.3074	0.66	1.46	0.66	0
Tb927.7.6990	cytochrome c oxidase complex	Mito.e.transport	84	159	293	268	58	69.6	71.8	103.2	91.8	127.5	6.121	6.1659	6.6893	6.5204	6.9944	0.67	0.55	0.55	0
Tb927.5.3040	Cytochrome c Oxidase complex, MIX protein	Mito.e.transport	25	86	107	94	10	20.7	38.8	37.7	32.2	22	4.3716	5.278	5.2365	5.009	4.4594	0.55	0.94	0.55	0
Tb927.3.2650	cytochrome c oxidase copper chaperone, putative	Mito.e.transport	66	259	127	164	28	54.7	116.9	44.8	56.2	61.6	5.7735	6.8691	5.4854	5.8125	5.9449	0.97	0.89	0.89	0
Tb927.11.11950	cytochrome oxidase assembly protein, putative	Mito.e.transport	38	93	53	44	9	31.5	42	18.7	15.1	19.8	4.9773	5.3923	4.225	3.9165	4.3074	1.68	1.59	1.59	0
Tb927.1.4100	cytochrome oxidase subunit IV (COXIV)	Mito.e.transport	96	173	213	225	36	79.5	78.1	75.1	77.1	79.1	6.3129	6.2873	6.2307	6.2687	6.3056	1.01	0.99	0.99	0
Tb927.10.8320	cytochrome oxidase subunit IX (COXIX)	Mito.e.transport	95	312	271	311	24	78.7	140.9	95.5	106.5	52.8	6.2983	7.1385	6.5774	6.7347	5.7225	0.74	1.49	0.74	0
Tb927.9.3170	cytochrome oxidase subunit V (COXV)	Mito.e.transport	58	147	109	140	31	48	66.4	38.4	48	68.2	5.585	6.0531	5.263	5.585	6.0917	1	0.7	0.7	0
Tb927.10.280	cytochrome oxidase subunit VI (COXVI)	Mito.e.transport	114	330	224	173	35	94.4	149	78.9	59.3	76.9	6.5607	7.2192	6.302	5.89	6.2649	1.2	1.23	1.2	0
Tb927.3.1410	cytochrome oxidase subunit VII (COXVII)	Mito.e.transport	112	271	320	388	131	92.8	122.3	112.8	132.9	288	6.5361	6.9343	6.8176	7.0542	8.1699	0.7	0.32	0.32	0
Tb927.4.4620	cytochrome oxidase subunit VIII (COXVIII)	Mito.e.transport	39	133	84	84	20	32.3	60	29.6	28.8	44	5.0135	5.9069	4.8875	4.848	5.4594	1.09	0.73	0.73	0
Tb927.3.680	cytochrome P450, putative	Mito.e.transport	52	152	141	182	21	43.1	68.6	49.7	62.3	46.2	5.4296	6.1001	5.6352	5.9612	5.5298	0.69	0.93	0.69	0
Tb927.8.1240	electron transfer flavoprotein-ubiquinone oxidoreductase, putative	Mito.e.transport	55	159	247	210	30	45.6	71.8	87	71.9	66	5.511	6.1659	6.4429	6.1679	6.0444	0.52	0.69	0.52	0
Tb927.11.180	electron transfer flavoprotein, putative	Mito.e.transport	78	186	258	291	39	64.6	84	90.9	99.7	85.7	6.0135	6.3923	6.5062	6.6395	6.4212	0.65	0.75	0.65	0
Tb927.10.12540	electron transfer protein, putative,ferredoxin, putative	Mito.e.transport	103	169	327	421	44	85.3	76.3	115.2	144.2	96.7	6.4145	6.2536	6.848	7.1719	6.5954	0.53	0.79	0.53	0
Tb927.9.2450	electron transport protein SCO1/SCO2, putative	Mito.e.transport	53	86	179	171	22	43.9	38.8	63.1	58.6	48.4	5.4561	5.278	5.9796	5.8728	5.5969	0.61	0.8	0.61	0
Tb927.11.7540	electron-transfer-flavoprotein, alpha polypeptide, putative	Mito.e.transport	57	149	216	232	6	47.2	67.3	76.1	79.5	13.2	5.5607	6.0725	6.2498	6.3129	3.7225	0.59	3.58	0.59	0
Tb927.10.5500	hypothetical protein, conserved,, in NADH dehydrogenase complex	Mito.e.transport	90	163	324	350	70	74.5	73.6	114.2	119.9	153.9	6.2192	6.2016	6.8354	6.9057	7.2658	0.61	0.48	0.48	0
Tb927.10.4880	hypothetical protein, possible component of cytochorome oxidase complex	Mito.e.transport	158	296	428	448	80	130.9	133.6	150.8	153.5	175.9	7.0323	7.0618	7.2365	7.2621	7.4586	0.85	0.74	0.74	0
Tb927.9.10520	hypothetical protein, possible component of cytochorome oxidase complex	Mito.e.transport	64	134	256	260	83	53	60.5	90.2	89.1	182.5	5.7279	5.9189	6.4951	6.4774	7.5118	0.59	0.29	0.29	0
Tb927.10.5220	hypothetical protein, possible component of cytochorome oxidase complex	Mito.e.transport	85	235	253	285	35	70.4	106.1	89.2	97.6	76.9	6.1375	6.7293	6.479	6.6088	6.2649	0.72	0.92	0.72	0
Tb927.3.1940	hypothetical protein, possible component of cytochorome oxidase complex	Mito.e.transport	81	175	211	144	24	67.1	79	74.4	49.3	52.8	6.0682	6.3038	6.2172	5.6235	5.7225	0.9	1.27	0.9	0
Tb927.11.2010	hypothetical protein, possible component of cytochorome oxidase complex	Mito.e.transport	63	92	195	187	42	52.2	41.5	68.7	64.1	92.3	5.706	5.375	6.1022	6.0023	6.5283	0.6	0.45	0.45	0
Tb927.5.2580	hypothetical protein, possible component of cytochorome oxidase complex	Mito.e.transport	39	87	144	177	17	32.3	39.3	50.7	60.6	37.4	5.0135	5.2965	5.6639	5.9212	5.225	0.53	0.86	0.53	0
Tb927.9.14200	hypothetical protein, possible component of cytochorome oxidase complex	Mito.e.transport	88	145	119	149	16	72.9	65.5	41.9	51	35.2	6.1878	6.0334	5.3889	5.6724	5.1375	1.28	1.86	1.28	0
Tb927.11.10140	hypothetical protein, possible component of cytochorome oxidase complex	Mito.e.transport	65	122	118	101	18	53.8	55.1	41.6	34.6	39.6	5.7495	5.784	5.3785	5.1127	5.3074	1.29	1.36	1.29	0
Tb927.10.13600	hypothetical protein, possible component of cytochorome oxidase complex	Mito.e.transport	57	142	62	50	7	47.2	64.1	21.8	17.1	15.4	5.5607	6.0023	4.4463	4.0959	3.9449	2.17	3.06	2.17	0
Tb927.10.2550	malate dehydrogenase-related	Mito.e.transport	59	168	174	164	15	48.9	75.8	61.3	56.2	33	5.6118	6.2441	5.9378	5.8125	5.0444	0.8	1.48	0.8	0
Tb927.10.9440	NADH dehydrogenase (54 NDH2) in TAO/G3PDH complex	Mito.e.transport	184	252	416	426	91	152.4	113.8	146.6	145.9	200.1	7.2517	6.8304	7.1957	7.1888	7.6446	0.78	0.57	0.57	0
Tb927.11.8910	NADH dehydrogenase subunit NB6M, putative	Mito.e.transport	54	141	108	101	12	44.7	63.7	38.1	34.6	26.4	5.4822	5.9932	5.2517	5.1127	4.7225	1.17	1.69	1.17	0
Tb927.11.15810	NADH dehydrogenase subunit NI2M, putative	Mito.e.transport	95	188	232	223	38	78.7	84.9	81.8	76.4	83.5	6.2983	6.4077	6.354	6.2555	6.3837	0.96	0.94	0.94	0
Tb927.11.16870	NADH dehydrogenase subunit NI8M, putative	Mito.e.transport	92	176	168	173	31	76.2	79.5	59.2	59.3	68.2	6.2517	6.3129	5.8875	5.89	6.0917	1.28	1.12	1.12	0
Tb927.11.6970	NADH-cytochrome b5 reductase-like protein	Mito.e.transport	72	209	204	177	30	59.6	94.4	71.9	60.6	66	5.8972	6.5607	6.1679	5.9212	6.0444	0.83	0.9	0.83	0
Tb927.7.2710	NADH-cytochrome b5 reductase, putative	Mito.e.transport	72	121	260	268	22	59.6	54.6	91.6	91.8	48.4	5.8972	5.7708	6.5173	6.5204	5.5969	0.59	1.13	0.59	0
Tb927.5.1470	NADH-cytochrome b5 reductase, putative (B5R)	Mito.e.transport	95	225	477	497	99	78.7	101.6	168.1	170.2	217.7	6.2983	6.6668	7.3932	7.4111	7.7662	0.46	0.36	0.36	0
Tb927.7.2700	NADH-cytochrome b5 reductase, putative (B5R)	Mito.e.transport	137	273	440	473	73	113.5	123.3	155	162	160.5	6.8265	6.946	7.2761	7.3399	7.3264	0.7	0.71	0.7	0
Tb927.11.1310	NADH-cytochrome b5 reductase, putative (B5R)	Mito.e.transport	81	150	374	558	76	67.1	67.7	131.8	191.1	167.1	6.0682	6.0811	7.0422	7.5782	7.3846	0.35	0.4	0.35	0
Tb927.11.3750	NADH-cytochrome b5 reductase, putative (B5R)	Mito.e.transport	38	81	120	111	12	31.5	36.6	42.3	38	26.4	4.9773	5.1938	5.4026	5.2479	4.7225	0.74	1.19	0.74	0
Tb927.11.15550	NADH-cytochrome b5 reductase, putative (B5R)	Mito.e.transport	59	82	97	96	15	48.9	37	34.2	32.9	33	5.6118	5.2095	5.0959	5.04	5.0444	1.08	1.12	1.08	0
Tb927.11.1320	NADH-ubiquinone oxidoreductase 20 kDa subunit, NDUFS7 (NDHK)	Mito.e.transport	67	154	164	193	44	55.5	69.5	57.8	66.1	96.7	5.7944	6.1189	5.853	6.0466	6.5954	0.84	0.57	0.57	0
Tb927.10.9620	NADH-ubiquinone oxidoreductase c	Mito.e.transport	31	41	67	70	11	25.7	18.5	23.6	24	24.2	4.6837	4.2095	4.5607	4.585	4.5969	0.77	0.76	0.76	0
Tb927.10.13620	NADH-ubiquinone oxidoreductase complex I subunit, NDUFA9 subunit, putative	Mito.e.transport	73	132	198	160	21	60.5	59.6	69.8	54.8	46.2	5.9189	5.8972	6.1252	5.7761	5.5298	0.85	1.29	0.85	0
Tb927.7.3910	NADH-ubiquinone oxidoreductase complex I subunit, putative	Mito.e.transport	120	211	607	799	66	99.4	95.3	213.9	273.7	145.1	6.6352	6.5744	7.7408	8.0965	7.1809	0.35	0.66	0.35	0
Tb927.11.9930	NADH-ubiquinone oxidoreductase complex I subunit, putative	Mito.e.transport	106	228	276	222	38	87.8	102.9	97.3	76	83.5	6.4561	6.6851	6.6044	6.2479	6.3837	0.9	1.05	0.9	0
Tb927.9.15010	NADH-ubiquinone oxidoreductase complex I subunit, putative	Mito.e.transport	105	255	251	243	30	87	115.1	88.4	83.2	66	6.4429	6.8467	6.466	6.3785	6.0444	0.98	1.32	0.98	0
Tb927.4.4300	NADH-ubiquinone oxidoreductase complex I subunit, putative	Mito.e.transport	71	145	168	198	19	58.8	65.5	59.2	67.8	41.8	5.8777	6.0334	5.8875	6.0832	5.3854	0.87	1.41	0.87	0
Tb927.11.15440	NADH-ubiquinone oxidoreductase complex I subunit, putative	Mito.e.transport	87	184	118	113	10	72.1	83.1	41.6	38.7	22	6.1719	6.3768	5.3785	5.2743	4.4594	1.73	3.28	1.73	0
Tb927.10.4130	NADH-ubiquinone oxidoreductase complex I subunit, putative,NDUFA5/B13 subunit, putative	Mito.e.transport	93	228	399	433	30	77	102.9	140.6	148.3	66	6.2668	6.6851	7.1355	7.2124	6.0444	0.52	1.17	0.52	0
Tb927.9.15380	NADH-ubiquinone oxidoreductase complex I subunit, putative,NDUFA9 subunit, putative	Mito.e.transport	89	205	332	352	32	73.7	92.6	117	120.6	70.4	6.2036	6.5329	6.8704	6.9141	6.1375	0.61	1.05	0.61	0
Tb927.5.450	NADH-ubiquinone oxidoreductase, mitochondrial, putative	Mito.e.transport	144	315	463	447	100	119.3	142.2	163.1	153.1	219.9	6.8985	7.1518	7.3496	7.2583	7.7807	0.73	0.54	0.54	0
Tb927.7.6350	NADH-ubiquinone oxidoreductase, mitochondrial, putative	Mito.e.transport	78	203	232	209	41	64.6	91.6	81.8	71.6	90.1	6.0135	6.5173	6.354	6.1619	6.4935	0.79	0.72	0.72	0
Tb927.4.1670	POMP29, cytochrome b5-like haem-binding domain	Mito.e.transport	65	101	140	169	38	53.8	45.6	49.3	57.9	83.5	5.7495	5.511	5.6235	5.8555	6.3837	0.79	0.55	0.55	0
Tb927.7.3590	SDH succinate dehydrogenase (complex II) subunit, putative	Mito.e.transport	82	255	141	138	13	67.9	115.1	49.7	47.3	28.6	6.0853	6.8467	5.6352	5.5638	4.8379	1.37	2.37	1.37	0
Tb927.8.1490	SDH succinate dehydrogenase (complex II) subunit, putative	Mito.e.transport	105	176	82	97	8	87	79.5	28.9	33.2	17.6	6.4429	6.3129	4.853	5.0531	4.1375	2.39	4.52	2.39	0
Tb927.8.6580	SDH1 succinate dehydrogenase (complex II) subunit, flavoprotein	Mito.e.transport	134	320	361	353	58	111	144.5	127.2	120.9	127.5	6.7944	7.1749	6.991	6.9177	6.9944	0.87	0.87	0.87	0
Tb927.5.510	SDH10 succinate dehydrogenase (complex II) subunit	Mito.e.transport	53	64	209	213	27	43.9	28.9	73.6	73	59.4	5.4561	4.853	6.2016	6.1898	5.8924	0.39	0.49	0.39	0
Tb927.9.5960	SDH2C succinate dehydrogenase (complex II) subunit	Mito.e.transport	41	74	121	137	18	34	33.4	42.6	46.9	39.6	5.0875	5.0618	5.4128	5.5515	5.3074	0.71	0.84	0.71	0
Tb927.8.3380	SDH2N succinate dehydrogenase (complex II) subunit, electron transfer protein	Mito.e.transport	125	346	500	594	85	103.5	156.2	176.2	203.5	186.9	6.6935	7.2873	7.4611	7.6689	7.5461	0.51	0.55	0.51	0
Tb927.6.4130	SDH3 succinate dehydrogenase (complex II) subunit, cytochrome B subunit	Mito.e.transport	73	251	200	172	150	60.5	113.3	70.5	58.9	329.8	5.9189	6.824	6.1396	5.8802	8.3654	0.86	0.18	0.18	0
Tb927.3.3460	SDH5 succinate dehydrogenase (complex II) subunit	Mito.e.transport	106	277	328	353	38	87.8	125.1	115.6	120.9	83.5	6.4561	6.9669	6.853	6.9177	6.3837	0.73	1.05	0.73	0
Tb927.8.5640	SDH6 succinate dehydrogenase (complex II) subunit	Mito.e.transport	84	251	191	182	34	69.6	113.3	67.3	62.3	74.7	6.121	6.824	6.0725	5.9612	6.223	1.03	0.93	0.93	0
Tb927.6.2490	SDH7 succinate dehydrogenase (complex II) subunit	Mito.e.transport	82	253	177	161	43	67.9	114.2	62.4	55.1	94.5	6.0853	6.8354	5.9635	5.784	6.5622	1.09	0.72	0.72	0
Tb927.2.4700	SDH8 succinate dehydrogenase (complex II) subunit	Mito.e.transport	21	44	94	126	12	17.4	19.9	33.1	43.2	26.4	4.121	4.3147	5.0488	5.433	4.7225	0.4	0.66	0.4	0
Tb927.10.3040	SDH9 succinate dehydrogenase (complex II) subunit	Mito.e.transport	83	147	135	137	9	68.8	66.4	47.6	46.9	19.8	6.1043	6.0531	5.5729	5.5515	4.3074	1.39	3.35	1.39	0
Tb927.4.4990	ubiquinol-cytochrome c reductase, putative	Mito.e.transport	102	191	268	268	49	84.5	86.2	94.4	91.8	107.7	6.4009	6.4296	6.5607	6.5204	6.7509	0.9	0.78	0.78	0
Tb927.10.510	LOK1=POMP19 Mitochondrial membrane formation	Mito.membrane	69	105	245	278	23	57.2	47.4	86.3	95.2	50.6	5.8379	5.5668	6.4313	6.5729	5.6611	0.5	0.94	0.5	0
Tb927.9.3780	MPC1 mitochondrial pyruvate carrier	Mito.membrane	69	137	116	139	8	57.2	61.9	40.9	47.6	17.6	5.8379	5.9519	5.354	5.5729	4.1375	1.2	3.25	1.2	0
Tb927.7.3520	MPC2 mitochondrial pyruvate carrier	Mito.membrane	123	480	296	324	140	101.9	216.7	104.3	111	307.8	6.671	7.7596	6.7046	6.7944	8.2658	0.92	0.33	0.33	0
Tb927.7.5700	pATOM36	Mito.membrane	102	190	335	323	60	84.5	85.8	118	110.6	131.9	6.4009	6.4229	6.8826	6.7892	7.0433	0.72	0.64	0.64	0
Tb927.11.13180	POMP10	Mito.membrane	188	444	655	644	91	155.7	200.5	230.8	220.6	200.1	7.2826	7.6475	7.8505	7.7853	7.6446	0.67	0.78	0.67	0
Tb927.11.2580	POMP11	Mito.membrane	67	148	175	239	19	55.5	66.8	61.7	81.9	41.8	5.7944	6.0618	5.9472	6.3558	5.3854	0.68	1.33	0.68	0
Tb927.11.3100	POMP13, Trypanosome-specific, putative TM domain at Cterminus	Mito.membrane	62	154	162	191	27	51.4	69.5	57.1	65.4	59.4	5.6837	6.1189	5.8354	6.0312	5.8924	0.79	0.87	0.79	0
Tb927.11.5600	POMP14	Mito.membrane	40	89	174	212	16	33.1	40.2	61.3	72.6	35.2	5.0488	5.3291	5.9378	6.1819	5.1375	0.46	0.94	0.46	0
Tb11.02.5105	POMP15	Mito.membrane	75	187	178	197	25	62.1	84.4	62.7	67.5	55	5.9565	6.3992	5.9704	6.0768	5.7814	0.92	1.13	0.92	0
Tb927.1.3800	POMP18	Mito.membrane	59	126	219	201	9	48.9	56.9	77.2	68.9	19.8	5.6118	5.8304	6.2705	6.1064	4.3074	0.63	2.47	0.63	0
Tb927.9.2650	POMP2	Mito.membrane	104	201	396	333	39	86.1	90.7	139.5	114.1	85.7	6.4279	6.503	7.1241	6.8342	6.4212	0.62	1	0.62	0
Tb927.10.9140	POMP20	Mito.membrane	102	288	243	236	34	84.5	130	85.6	80.8	74.7	6.4009	7.0224	6.4195	6.3363	6.223	0.99	1.13	0.99	0
Tb927.10.11030	POMP21	Mito.membrane	117	222	150	155	21	96.9	100.2	52.9	53.1	46.2	6.5984	6.6467	5.7252	5.7306	5.5298	1.82	2.1	1.82	0
Tb927.2.5530	POMP22	Mito.membrane	428	654	1175	1035	120	354.5	295.3	414	354.5	263.8	8.4696	8.206	8.6935	8.4696	8.0433	0.71	1.12	0.71	0
Tb927.3.1080	POMP23	Mito.membrane	132	207	372	388	59	109.3	93.5	131.1	132.9	129.7	6.7721	6.5469	7.0345	7.0542	7.019	0.7	0.72	0.7	0
Tb927.3.3130	POMP24	Mito.membrane	515	843	1201	1083	193	426.6	380.6	423.2	371	424.3	8.7367	8.5721	8.7252	8.5353	8.7289	0.9	0.9	0.9	0
Tb927.3.3520	POMP25	Mito.membrane	103	260	331	311	25	85.3	117.4	116.6	106.5	55	6.4145	6.8753	6.8654	6.7347	5.7814	0.73	1.55	0.73	0
Tb927.3.4640	POMP26	Mito.membrane	70	290	191	185	41	58	130.9	67.3	63.4	90.1	5.858	7.0323	6.0725	5.9864	6.4935	0.86	0.64	0.64	0
Tb927.4.1540	POMP27, NAD-dependent epimerase, aldehyde reductase, one putative TM domain	Mito.membrane	170	230	375	370	53	140.8	103.8	132.1	126.7	116.5	7.1375	6.6977	7.0455	6.9853	6.8642	0.79	0.89	0.79	0
Tb927.9.2670	POMP3	Mito.membrane	108	239	305	324	32	89.5	107.9	107.5	111	70.4	6.4838	6.7536	6.7482	6.7944	6.1375	0.81	1.27	0.81	0
Tb927.6.3680	POMP31	Mito.membrane	101	220	190	216	17	83.7	99.3	67	74	37.4	6.3872	6.6337	6.0661	6.2095	5.225	1.13	2.24	1.13	0
Tb927.6.4180	POMP32	Mito.membrane	73	200	158	182	37	60.5	90.3	55.7	62.3	81.3	5.9189	6.4967	5.7996	5.9612	6.3452	0.97	0.74	0.74	0
Tb927.7.2960	POMP33	Mito.membrane	77	146	205	241	23	63.8	65.9	72.2	82.6	50.6	5.9955	6.0422	6.1739	6.3681	5.6611	0.77	1.26	0.77	0
Tb927.7.4890	POMP34	Mito.membrane	165	313	581	539	76	136.7	141.3	204.7	184.6	167.1	7.0949	7.1426	7.6774	7.5283	7.3846	0.67	0.82	0.67	0
Tb927.7.5470	POMP36	Mito.membrane	105	312	285	278	43	87	140.9	100.4	95.2	94.5	6.4429	7.1385	6.6496	6.5729	6.5622	0.87	0.92	0.87	0
Tb927.7.7210	POMP37	Mito.membrane	133	299	459	460	51	110.2	135	161.7	157.6	112.1	6.784	7.0768	7.3372	7.3001	6.8086	0.68	0.98	0.68	0
Tb927.8.1470	POMP38	Mito.membrane	82	161	142	120	17	67.9	72.7	50	41.1	37.4	6.0853	6.1839	5.6439	5.3611	5.225	1.36	1.82	1.36	0
Tb927.8.4380	POMP40	Mito.membrane	72	118	209	250	19	59.6	53.3	73.6	85.6	41.8	5.8972	5.7361	6.2016	6.4195	5.3854	0.62	1.28	0.62	0
Tb927.8.5130	POMP41	Mito.membrane	88	176	219	206	40	72.9	79.5	77.2	70.6	87.9	6.1878	6.3129	6.2705	6.1416	6.4578	0.94	0.83	0.83	0
Tb927.9.9080	POMP5	Mito.membrane	91	138	213	251	19	75.4	62.3	75.1	86	41.8	6.2365	5.9612	6.2307	6.4263	5.3854	0.72	1.49	0.72	0
Tb927.9.10560	POMP6/TbLOK1	Mito.membrane	90	99	262	323	67	74.5	44.7	92.3	110.6	147.3	6.2192	5.4822	6.5283	6.7892	7.2026	0.4	0.3	0.3	0
Tb927.9.12500	POMP7	Mito.membrane	78	138	196	198	21	64.6	62.3	69.1	67.8	46.2	6.0135	5.9612	6.1106	6.0832	5.5298	0.9	1.35	0.9	0
Tb927.9.13120	POMP8	Mito.membrane	50	145	106	126	32	41.4	65.5	37.4	43.2	70.4	5.3716	6.0334	5.225	5.433	6.1375	0.96	0.59	0.59	0
Tb927.11.11460	POMP9	Mito.membrane	199	456	609	558	52	164.8	205.9	214.6	191.1	114.3	7.3646	7.6858	7.7455	7.5782	6.8367	0.77	1.44	0.77	0
Tb927.8.6600	SAM35, putative	Mito.membrane	56	106	153	167	28	46.4	47.9	53.9	57.2	61.6	5.5361	5.582	5.7522	5.8379	5.9449	0.81	0.75	0.75	0
Tb927.6.1570	2-hydroxy-3-oxopropionate reductase, putative	Mito.pathway	227	386	364	414	76	188	174.3	128.3	141.8	167.1	7.5546	7.4454	7.0034	7.1477	7.3846	1.23	1.04	1.04	0
Tb927.9.6060	2Fe-2S iron-sulfur cluster binding domain containing protein, POMP4	Mito.pathway	67	101	222	233	23	55.5	45.6	78.2	79.8	50.6	5.7944	5.511	6.2891	6.3183	5.6611	0.57	0.9	0.57	0
Tb927.11.10960	2OG-Fe(II) oxygenase superfamily, putative	Mito.pathway	106	218	453	422	101	87.8	98.4	159.6	144.6	222	6.4561	6.6206	7.3183	7.1759	7.7944	0.55	0.4	0.4	0
Tb927.3.950	2OG-Fe(II) oxygenase superfamily, putative	Mito.pathway	92	184	110	98	20	76.2	83.1	38.8	33.6	44	6.2517	6.3768	5.278	5.0704	5.4594	1.96	1.73	1.73	0
Tb927.8.6110	3-hydroxy-3-methylglutaryl-CoA synthase, putative (HMGS)	Mito.pathway	200	484	504	456	50	165.7	218.5	177.6	156.2	109.9	7.3724	7.7715	7.4725	7.2873	6.78	0.93	1.51	0.93	0
Tb927.7.2630	50S ribosome-binding GTPase, putative	Mito.pathway	240	498	730	665	121	198.8	224.8	257.2	227.8	266	7.6352	7.8125	8.0067	7.8316	8.0553	0.77	0.75	0.75	0
Tb927.8.4000	ABC1 family, putative	Mito.pathway	169	301	369	369	42	140	135.9	130	126.4	92.3	7.1293	7.0864	7.0224	6.9819	6.5283	1.05	1.47	1.05	0
Tb927.10.8730	ABC1 family, putative	Mito.pathway	37	78	138	148	41	30.6	35.2	48.6	50.7	90.1	4.9355	5.1375	5.6029	5.6639	6.4935	0.6	0.34	0.34	0
Tb927.3.4260	Acyl-coenzyme A thioesterase, putative	Mito.pathway	88	124	369	434	76	72.9	56	130	148.7	167.1	6.1878	5.8074	7.0224	7.2163	7.3846	0.38	0.34	0.34	0
Tb927.10.2230	adrenodoxin reductase, putative,ferredoxin NADP reductase-like protein	Mito.pathway	91	260	335	332	55	75.4	117.4	118	113.7	120.9	6.2365	6.8753	6.8826	6.8291	6.9177	0.64	0.62	0.62	0
Tb927.10.6190	aldehyde dehydrogenase, putative (ALDH)	Mito.pathway	124	441	349	324	61	102.7	199.1	123	111	134.1	6.6823	7.6373	6.9425	6.7944	7.0672	0.83	0.77	0.77	0
Tb927.4.600	Alpha/beta hydrolase family, putative	Mito.pathway	116	225	364	465	76	96.1	101.6	128.3	159.3	167.1	6.5865	6.6668	7.0034	7.3156	7.3846	0.6	0.58	0.58	0
Tb927.6.2010	AMP-binding enzyme, putative	Mito.pathway	76	218	405	461	88	63	98.4	142.7	157.9	193.5	5.9773	6.6206	7.1568	7.3029	7.5962	0.4	0.33	0.33	0
Tb927.10.13850	ATP12 chaperone protein, putative	Mito.pathway	98	157	170	263	39	81.2	70.9	59.9	90.1	85.7	6.3434	6.1477	5.9045	6.4935	6.4212	0.79	0.83	0.79	0
Tb927.7.6930	ATPase, putative	Mito.pathway	64	121	118	140	20	53	54.6	41.6	48	44	5.7279	5.7708	5.3785	5.585	5.4594	1.1	1.2	1.1	0
Tb927.10.11930	beta-D-hydroxybutyrate dehydrogenase	Mito.pathway	86	176	190	189	23	71.2	79.5	67	64.7	50.6	6.1538	6.3129	6.0661	6.0157	5.6611	1.06	1.41	1.06	0
Tb927.11.1350	calcium uniporter protein, mitochondrial	Mito.pathway	101	193	435	463	83	83.7	87.1	153.3	158.6	182.5	6.3872	6.4446	7.2602	7.3092	7.5118	0.53	0.46	0.46	0
Tb927.10.14860	Complex 1 protein (LYR family), putative	Mito.pathway	219	329	781	939	108	181.4	148.5	275.2	321.7	237.4	7.503	7.2143	8.1043	8.3296	7.8912	0.46	0.63	0.46	0
Tb927.3.940	Complex 1 protein (LYR family), putative	Mito.pathway	45	109	190	184	19	37.3	49.2	67	63	41.8	5.2211	5.6206	6.0661	5.9773	5.3854	0.56	0.89	0.56	0
Tb927.4.1130	Complex 1 protein (LYR family), putative	Mito.pathway	88	172	151	135	21	72.9	77.7	53.2	46.2	46.2	6.1878	6.2798	5.7334	5.5298	5.5298	1.37	1.58	1.37	0
Tb927.9.14160	Complex III cytochrome b/c complex, rieske iron-sulfur protein ISP	Mito.pathway	93	215	275	361	72	77	97.1	96.9	123.7	158.3	6.2668	6.6014	6.5984	6.9507	7.3065	0.62	0.49	0.49	0
Tb927.11.5920	conserved protein	Mito.pathway	66	149	141	150	27	54.7	67.3	49.7	51.4	59.4	5.7735	6.0725	5.6352	5.6837	5.8924	1.06	0.92	0.92	0
Tb927.6.1590	conserved protein	Mito.pathway	53	110	126	123	11	43.9	49.7	44.4	42.1	24.2	5.4561	5.6352	5.4725	5.3957	4.5969	0.99	1.81	0.99	0
Tb927.1.1730	conserved protein, unknown function	Mito.pathway	141	293	417	375	64	116.8	132.3	146.9	128.5	140.7	6.8679	7.0477	7.1987	7.0056	7.1365	0.8	0.83	0.8	0
Tb927.4.830	cytochrome c oxidase assembly protein PET191, putative	Mito.pathway	30	52	84	120	29	24.8	23.5	29.6	41.1	63.8	4.6323	4.5546	4.8875	5.3611	5.9955	0.57	0.37	0.37	0
Tb927.3.1890	cytochrome c oxidase assembly protein, putative	Mito.pathway	65	232	136	158	25	53.8	104.7	47.9	54.1	55	5.7495	6.7101	5.582	5.7576	5.7814	0.99	0.98	0.98	0
Tb927.7.5260	Cytochrome c oxidase biogenesis protein Cmc1 like, putative	Mito.pathway	149	315	319	300	52	123.4	142.2	112.4	102.8	114.3	6.9472	7.1518	6.8125	6.6837	6.8367	1.1	1.08	1.08	0
Tb927.1.3950	D-alanine aminotransferase (ALAT)	Mito.pathway	596	925	652	643	76	493.7	417.6	229.7	220.3	167.1	8.9475	8.706	7.8436	7.7833	7.3846	1.82	2.5	1.82	0
Tb927.10.3210	delta-1-pyrroline-5-carboxylate dehydrogenase, putative	Mito.pathway	437	732	1028	1044	131	362	330.5	362.2	357.6	288	8.4998	8.3685	8.5006	8.4822	8.1699	0.91	1.15	0.91	0
Tb927.1.1000	developmentally regulated phosphoprotein (dr6)	Mito.pathway	95	249	324	450	84	78.7	112.4	114.2	154.1	184.7	6.2983	6.8125	6.8354	7.2677	7.529	0.51	0.43	0.43	0
Tb927.10.7570	dihydrolipoamide acetyltransferase E2 subunit, putative	Mito.pathway	289	658	866	709	117	239.4	297.1	305.2	242.9	257.2	7.9033	8.2148	8.2536	7.9242	8.0067	0.78	0.93	0.78	0
Tb927.5.4330	dihydrolipoamide branched chain transacylase, putative	Mito.pathway	90	177	320	336	53	74.5	79.9	112.8	115.1	116.5	6.2192	6.3201	6.8176	6.8467	6.8642	0.65	0.64	0.64	0
Tb927.11.13830	DnaJ domain containing protein, putative	Mito.pathway	81	134	240	254	9	67.1	60.5	84.6	87	19.8	6.0682	5.9189	6.4026	6.4429	4.3074	0.7	3.06	0.7	0
Tb927.11.570	DnaJ domain containing protein, putative	Mito.pathway	72	115	76	67	4	59.6	51.9	26.8	23	8.8	5.8972	5.6977	4.7442	4.5236	3.1375	1.94	5.9	1.94	0
Tb927.3.2300	DNL zinc finger, putative	Mito.pathway	75	138	228	212	6	62.1	62.3	80.3	72.6	13.2	5.9565	5.9612	6.3273	6.1819	3.7225	0.77	4.7	0.77	0
Tb927.11.6830	Domain of unknown function(DUF2779), putative	Mito.pathway	145	360	584	560	48	120.1	162.5	205.8	191.8	105.5	6.9081	7.3443	7.6851	7.5835	6.7211	0.58	1.14	0.58	0
Tb927.7.2410	Dynamin family, putative	Mito.pathway	130	172	660	691	108	107.7	77.7	232.6	236.7	237.4	6.7509	6.2798	7.8617	7.8869	7.8912	0.33	0.33	0.33	0
Tb927.7.890	FDXA Ferredoxin	Mito.pathway	54	77	106	99	13	44.7	34.8	37.4	33.9	28.6	5.4822	5.121	5.225	5.0832	4.8379	0.93	1.22	0.93	0
Tb927.10.2710	ferredoxin, putative	Mito.pathway	8	18	80	83	30	6.6	8.1	28.2	28.4	66	2.7225	3.0179	4.8176	4.8278	6.0444	0.23	0.1	0.1	0
Tb927.6.2510	Flavinator of succinate dehydrogenase, putative	Mito.pathway	54	121	220	253	20	44.7	54.6	77.5	86.7	44	5.4822	5.7708	6.2761	6.438	5.4594	0.52	1.02	0.52	0
Tb927.9.6710	flavoprotein monooxygenase, putative	Mito.pathway	124	160	187	150	22	102.7	72.2	65.9	51.4	48.4	6.6823	6.1739	6.0422	5.6837	5.5969	1.1	1.49	1.1	0
Tb927.3.1000	frataxin	Mito.pathway	94	144	269	299	63	77.9	65	94.8	102.4	138.5	6.2836	6.0224	6.5668	6.6781	7.1137	0.63	0.47	0.47	0
Tb927.9.3600	Glycosyl transferase family 11, putative	Mito.pathway	99	213	162	168	21	82	96.2	57.1	57.5	46.2	6.3576	6.588	5.8354	5.8455	5.5298	1.43	1.77	1.43	0
Tb927.2.4240	GTP binding protein, putative	Mito.pathway	49	68	224	303	52	40.6	30.7	78.9	103.8	114.3	5.3434	4.9402	6.302	6.6977	6.8367	0.3	0.27	0.27	0
Tb927.9.10500	HAD hydrolase, TIGR01456 family/HAD hydrolase, family IIA, putative	Mito.pathway	101	233	299	275	25	83.7	105.2	105.4	94.2	55	6.3872	6.717	6.7197	6.5577	5.7814	0.79	1.52	0.79	0
Tb927.10.11160	HIRA-interacting protein 5, putative	Mito.pathway	92	181	192	190	24	76.2	81.7	67.7	65.1	52.8	6.2517	6.3523	6.0811	6.0246	5.7225	1.13	1.44	1.13	0
Tb927.6.2630	Hsp33 protein, putative	Mito.pathway	71	196	353	422	42	58.8	88.5	124.4	144.6	92.3	5.8777	6.4676	6.9588	7.1759	6.5283	0.41	0.64	0.41	0
Tb927.8.5100	hypothetical protein, conserved	Mito.pathway	551	599	914	829	210	456.4	270.4	322.1	284	461.7	8.8342	8.079	8.3314	8.1497	8.8508	0.84	0.59	0.59	0
Tb927.9.1380	hypothetical protein, conserved	Mito.pathway	271	481	878	1063	100	224.5	217.2	309.4	364.1	219.9	7.8106	7.7629	8.2733	8.5082	7.7807	0.6	0.99	0.6	0
Tb927.11.1700	hypothetical protein, conserved	Mito.pathway	192	309	857	799	78	159	139.5	302	273.7	171.5	7.3129	7.1241	8.2384	8.0965	7.4221	0.46	0.81	0.46	0
Tb927.7.2390	hypothetical protein, conserved	Mito.pathway	308	474	795	824	139	255.1	214	280.1	282.3	305.6	7.9949	7.7415	8.1298	8.1411	8.2555	0.76	0.7	0.7	0
Tb927.1.4230	hypothetical protein, conserved	Mito.pathway	137	242	681	753	101	113.5	109.3	240	257.9	222	6.8265	6.7721	7.9069	8.0107	7.7944	0.42	0.49	0.42	0
Tb927.11.9150	hypothetical protein, conserved	Mito.pathway	270	364	662	639	138	223.6	164.3	233.3	218.9	303.4	7.8048	7.3602	7.866	7.7741	8.2451	0.7	0.54	0.54	0
Tb927.8.5220	hypothetical protein, conserved	Mito.pathway	176	415	647	634	73	145.8	187.4	228	217.2	160.5	7.1878	7.55	7.8329	7.7629	7.3264	0.64	0.91	0.64	0
Tb927.10.7610	hypothetical protein, conserved	Mito.pathway	223	350	634	652	56	184.7	158	223.4	223.3	123.1	7.529	7.3038	7.8035	7.8028	6.9437	0.71	1.28	0.71	0
Tb927.7.5280	hypothetical protein, conserved	Mito.pathway	366	416	599	555	153	303.2	187.8	211.1	190.1	336.4	8.2441	7.5531	7.7218	7.5706	8.394	0.89	0.56	0.56	0
Tb927.3.4030	hypothetical protein, conserved	Mito.pathway	200	386	587	575	155	165.7	174.3	206.8	197	340.8	7.3724	7.4454	7.6921	7.6221	8.4128	0.8	0.49	0.49	0
Tb927.11.1400	hypothetical protein, conserved	Mito.pathway	144	284	564	587	66	119.3	128.2	198.7	201.1	145.1	6.8985	7.0023	7.6344	7.6518	7.1809	0.59	0.82	0.59	0
Tb927.7.5440	hypothetical protein, conserved	Mito.pathway	268	370	520	532	84	222	167	183.2	182.2	184.7	7.7944	7.3837	7.5173	7.5094	7.529	0.91	0.9	0.9	0
Tb927.2.5930	hypothetical protein, conserved	Mito.pathway	154	309	498	525	70	127.6	139.5	175.5	179.8	153.9	6.9955	7.1241	7.4553	7.4902	7.2658	0.71	0.83	0.71	0
Tb927.10.9830	hypothetical protein, conserved	Mito.pathway	140	242	493	530	48	116	109.3	173.7	181.5	105.5	6.858	6.7721	7.4405	7.5038	6.7211	0.6	1.04	0.6	0
Tb927.8.1770	hypothetical protein, conserved	Mito.pathway	117	141	474	489	106	96.9	63.7	167	167.5	233	6.5984	5.9932	7.3837	7.388	7.8642	0.38	0.27	0.27	0
Tb927.7.1080	hypothetical protein, conserved	Mito.pathway	91	168	472	524	56	75.4	75.8	166.3	179.5	123.1	6.2365	6.2441	7.3776	7.4878	6.9437	0.42	0.61	0.42	0
Tb927.8.4240	hypothetical protein, conserved	Mito.pathway	225	284	463	383	102	186.4	128.2	163.1	131.2	224.2	7.5423	7.0023	7.3496	7.0356	7.8086	0.79	0.57	0.57	0
Tb927.10.10780	hypothetical protein, conserved	Mito.pathway	119	290	461	504	64	98.6	130.9	162.4	172.6	140.7	6.6235	7.0323	7.3434	7.4313	7.1365	0.57	0.7	0.57	0
Tb927.11.240	hypothetical protein, conserved	Mito.pathway	133	207	452	454	76	110.2	93.5	159.3	155.5	167.1	6.784	6.5469	7.3156	7.2808	7.3846	0.59	0.56	0.56	0
Tb927.5.530	hypothetical protein, conserved	Mito.pathway	101	229	439	361	60	83.7	103.4	154.7	123.7	131.9	6.3872	6.6921	7.2733	6.9507	7.0433	0.54	0.63	0.54	0
Tb927.9.2270	hypothetical protein, conserved	Mito.pathway	119	245	407	412	38	98.6	110.6	143.4	141.1	83.5	6.6235	6.7892	7.1639	7.1406	6.3837	0.69	1.18	0.69	0
Tb927.10.9000	hypothetical protein, conserved	Mito.pathway	234	340	405	332	47	193.8	153.5	142.7	113.7	103.3	7.5984	7.2621	7.1568	6.8291	6.6907	1.08	1.49	1.08	0
Tb927.10.6170	hypothetical protein, conserved	Mito.pathway	220	354	400	332	55	182.2	159.8	140.9	113.7	120.9	7.5094	7.3201	7.1385	6.8291	6.9177	1.13	1.32	1.13	0
Tb927.5.2150	hypothetical protein, conserved	Mito.pathway	136	270	398	414	45	112.7	121.9	140.2	141.8	98.9	6.8163	6.9296	7.1313	7.1477	6.6279	0.79	1.14	0.79	0
Tb927.3.1730	hypothetical protein, conserved	Mito.pathway	79	143	394	433	66	65.4	64.6	138.8	148.3	145.1	6.0312	6.0135	7.1169	7.2124	7.1809	0.44	0.45	0.44	0
Tb927.7.910	hypothetical protein, conserved	Mito.pathway	143	265	389	420	55	118.5	119.6	137.1	143.9	120.9	6.8887	6.9021	7.0991	7.1689	6.9177	0.82	0.98	0.82	0
Tb927.11.10720	hypothetical protein, conserved	Mito.pathway	195	372	378	418	42	161.5	167.9	133.2	143.2	92.3	7.3354	7.3915	7.0575	7.1619	6.5283	1.13	1.75	1.13	0
Tb927.10.3590	hypothetical protein, conserved	Mito.pathway	95	193	374	368	49	78.7	87.1	131.8	126.1	107.7	6.2983	6.4446	7.0422	6.9784	6.7509	0.6	0.73	0.6	0
Tb927.7.3100	hypothetical protein, conserved	Mito.pathway	119	282	371	403	57	98.6	127.3	130.7	138	125.3	6.6235	6.9921	7.0301	7.1085	6.9692	0.71	0.79	0.71	0
Tb927.11.16530	hypothetical protein, conserved	Mito.pathway	168	292	370	338	60	139.2	131.8	130.4	115.8	131.9	7.121	7.0422	7.0268	6.8555	7.0433	1.01	1	1	0
Tb927.11.11380	hypothetical protein, conserved	Mito.pathway	128	287	370	409	80	106	129.6	130.4	140.1	175.9	6.7279	7.0179	7.0268	7.1303	7.4586	0.76	0.6	0.6	0
Tb927.10.4850	hypothetical protein, conserved	Mito.pathway	131	288	365	320	54	108.5	130	128.6	109.6	118.7	6.7616	7.0224	7.0067	6.7761	6.8912	0.84	0.91	0.84	0
Tb927.9.9310	hypothetical protein, conserved	Mito.pathway	184	362	360	369	57	152.4	163.4	126.9	126.4	125.3	7.2517	7.3523	6.9875	6.9819	6.9692	1.2	1.22	1.2	0
Tb927.10.8980	hypothetical protein, conserved	Mito.pathway	151	286	357	306	52	125.1	129.1	125.8	104.8	114.3	6.9669	7.0123	6.975	6.7115	6.8367	0.99	1.09	0.99	0
Tb927.6.4070	hypothetical protein, conserved	Mito.pathway	87	197	355	392	46	72.1	88.9	125.1	134.3	101.1	6.1719	6.4741	6.9669	7.0693	6.6596	0.54	0.71	0.54	0
Tb927.8.7040	hypothetical protein, conserved	Mito.pathway	155	371	344	385	79	128.4	167.5	121.2	131.9	173.7	7.0045	7.388	6.9212	7.0433	7.4405	0.97	0.74	0.74	0
Tb927.10.5400	hypothetical protein, conserved	Mito.pathway	194	360	338	441	86	160.7	162.5	119.1	151.1	189.1	7.3282	7.3443	6.896	7.2394	7.563	1.06	0.85	0.85	0
Tb927.11.4850	hypothetical protein, conserved	Mito.pathway	183	308	331	418	40	151.6	139.1	116.6	143.2	87.9	7.2441	7.12	6.8654	7.1619	6.4578	0.97	1.58	0.97	0
Tb927.7.2990	hypothetical protein, conserved	Mito.pathway	160	362	324	353	31	132.5	163.4	114.2	120.9	68.2	7.0498	7.3523	6.8354	6.9177	6.0917	1.1	1.94	1.1	0
Tb927.9.1950	hypothetical protein, conserved	Mito.pathway	106	136	319	367	37	87.8	61.4	112.4	125.7	81.3	6.4561	5.9402	6.8125	6.9738	6.3452	0.49	0.76	0.49	0
Tb927.11.13910	hypothetical protein, conserved	Mito.pathway	119	218	314	255	57	98.6	98.4	110.6	87.3	125.3	6.6235	6.6206	6.7892	6.4479	6.9692	0.89	0.79	0.79	0
Tb927.10.9280	hypothetical protein, conserved	Mito.pathway	138	208	312	342	72	114.3	93.9	109.9	117.2	158.3	6.8367	6.5531	6.78	6.8728	7.3065	0.8	0.59	0.59	0
Tb927.4.2360	hypothetical protein, conserved	Mito.pathway	71	158	309	396	34	58.8	71.3	108.9	135.6	74.7	5.8777	6.1558	6.7669	7.0832	6.223	0.43	0.79	0.43	0
Tb927.11.1290	hypothetical protein, conserved	Mito.pathway	91	191	307	296	47	75.4	86.2	108.2	101.4	103.3	6.2365	6.4296	6.7576	6.6639	6.6907	0.7	0.73	0.7	0
Tb927.2.2210	hypothetical protein, conserved	Mito.pathway	138	224	302	263	26	114.3	101.1	106.4	90.1	57.2	6.8367	6.6596	6.7334	6.4935	5.8379	0.95	1.77	0.95	0
Tb927.10.9970	hypothetical protein, conserved	Mito.pathway	139	250	301	298	28	115.1	112.9	106.1	102.1	61.6	6.8467	6.8189	6.7293	6.6738	5.9449	1.06	1.83	1.06	0
Tb927.10.8610	hypothetical protein, conserved	Mito.pathway	143	280	301	291	55	118.5	126.4	106.1	99.7	120.9	6.8887	6.9819	6.7293	6.6395	6.9177	1.12	0.98	0.98	0
Tb927.5.4080	hypothetical protein, conserved	Mito.pathway	141	234	297	266	53	116.8	105.6	104.7	91.1	116.5	6.8679	6.7225	6.7101	6.5094	6.8642	1.01	0.91	0.91	0
Tb927.2.4380	hypothetical protein, conserved	Mito.pathway	98	198	288	316	39	81.2	89.4	101.5	108.2	85.7	6.3434	6.4822	6.6653	6.7576	6.4212	0.75	0.95	0.75	0
Tb927.11.15070	hypothetical protein, conserved	Mito.pathway	161	234	284	272	52	133.4	105.6	100.1	93.2	114.3	7.0596	6.7225	6.6453	6.5423	6.8367	1.05	0.92	0.92	0
Tb927.11.16750	hypothetical protein, conserved	Mito.pathway	110	318	283	256	28	91.1	143.6	99.7	87.7	61.6	6.5094	7.1659	6.6395	6.4545	5.9449	0.91	1.48	0.91	0
Tb927.11.13710	hypothetical protein, conserved	Mito.pathway	102	270	281	342	44	84.5	121.9	99	117.2	96.7	6.4009	6.9296	6.6294	6.8728	6.5954	0.72	0.87	0.72	0
Tb927.3.2670	hypothetical protein, conserved	Mito.pathway	104	172	279	306	49	86.1	77.7	98.3	104.8	107.7	6.4279	6.2798	6.6191	6.7115	6.7509	0.74	0.72	0.72	0
Tb927.7.640	hypothetical protein, conserved	Mito.pathway	85	117	275	247	16	70.4	52.8	96.9	84.6	35.2	6.1375	5.7225	6.5984	6.4026	5.1375	0.54	1.5	0.54	0
Tb927.10.11770	hypothetical protein, conserved	Mito.pathway	133	408	269	382	41	110.2	184.2	94.8	130.9	90.1	6.784	7.5251	6.5668	7.0323	6.4935	0.84	1.22	0.84	0
Tb927.4.2580	hypothetical protein, conserved	Mito.pathway	121	242	267	259	25	100.2	109.3	94.1	88.7	55	6.6467	6.7721	6.5561	6.4709	5.7814	1.06	1.82	1.06	0
Tb927.11.3940	hypothetical protein, conserved	Mito.pathway	91	145	259	303	37	75.4	65.5	91.3	103.8	81.3	6.2365	6.0334	6.5125	6.6977	6.3452	0.63	0.81	0.63	0
Tb927.11.6980	hypothetical protein, conserved	Mito.pathway	101	236	259	264	65	83.7	106.5	91.3	90.4	142.9	6.3872	6.7347	6.5125	6.4983	7.1589	0.92	0.59	0.59	0
Tb927.6.590	hypothetical protein, conserved	Mito.pathway	197	319	254	235	54	163.2	144	89.5	80.5	118.7	7.3505	7.1699	6.4838	6.3309	6.8912	1.61	1.21	1.21	0
Tb927.4.630	hypothetical protein, conserved	Mito.pathway	78	143	253	280	23	64.6	64.6	89.2	95.9	50.6	6.0135	6.0135	6.479	6.5835	5.6611	0.67	1.28	0.67	0
Tb927.7.5110	hypothetical protein, conserved	Mito.pathway	120	169	252	217	25	99.4	76.3	88.8	74.3	55	6.6352	6.2536	6.4725	6.2153	5.7814	0.86	1.39	0.86	0
Tb927.10.10120	hypothetical protein, conserved	Mito.pathway	156	230	251	248	33	129.2	103.8	88.4	85	72.6	7.0135	6.6977	6.466	6.4094	6.1819	1.17	1.43	1.17	0
Tb927.10.7910	hypothetical protein, conserved	Mito.pathway	80	155	247	223	39	66.3	70	87	76.4	85.7	6.0509	6.1293	6.4429	6.2555	6.4212	0.76	0.77	0.76	0
Tb927.8.2880	hypothetical protein, conserved	Mito.pathway	171	204	245	256	39	141.6	92.1	86.3	87.7	85.7	7.1457	6.5251	6.4313	6.4545	6.4212	1.05	1.07	1.05	0
Tb927.8.580	hypothetical protein, conserved	Mito.pathway	82	189	244	275	25	67.9	85.3	86	94.2	55	6.0853	6.4145	6.4263	6.5577	5.7814	0.72	1.23	0.72	0
Tb927.11.8800	hypothetical protein, conserved	Mito.pathway	89	129	244	287	38	73.7	58.2	86	98.3	83.5	6.2036	5.8629	6.4263	6.6191	6.3837	0.59	0.7	0.59	0
Tb927.7.7440	hypothetical protein, conserved	Mito.pathway	65	97	243	251	29	53.8	43.8	85.6	86	63.8	5.7495	5.4529	6.4195	6.4263	5.9955	0.51	0.69	0.51	0
Tb927.10.4240	hypothetical protein, conserved	Mito.pathway	123	322	242	209	31	101.9	145.4	85.3	71.6	68.2	6.671	7.1839	6.4145	6.1619	6.0917	1.19	1.49	1.19	0
Tb927.6.1410	hypothetical protein, conserved	Mito.pathway	70	180	241	191	45	58	81.3	84.9	65.4	98.9	5.858	6.3452	6.4077	6.0312	6.6279	0.68	0.59	0.59	0
Tb927.3.2370	hypothetical protein, conserved	Mito.pathway	91	207	241	229	101	75.4	93.5	84.9	78.4	222	6.2365	6.5469	6.4077	6.2928	7.7944	0.89	0.34	0.34	0
Tb927.3.2010	hypothetical protein, conserved	Mito.pathway	100	192	240	227	23	82.8	86.7	84.6	77.8	50.6	6.3716	6.438	6.4026	6.2817	5.6611	0.98	1.64	0.98	0
Tb927.8.2470	hypothetical protein, conserved	Mito.pathway	81	195	234	291	26	67.1	88	82.5	99.7	57.2	6.0682	6.4594	6.3663	6.6395	5.8379	0.67	1.17	0.67	0
Tb927.9.11350	hypothetical protein, conserved	Mito.pathway	79	135	231	210	18	65.4	60.9	81.4	71.9	39.6	6.0312	5.9284	6.347	6.1679	5.3074	0.75	1.54	0.75	0
Tb927.11.14700	hypothetical protein, conserved	Mito.pathway	79	168	227	219	58	65.4	75.8	80	75	127.5	6.0312	6.2441	6.3219	6.2288	6.9944	0.82	0.51	0.51	0
Tb927.10.760	hypothetical protein, conserved	Mito.pathway	53	59	225	264	44	43.9	26.6	79.3	90.4	96.7	5.4561	4.7334	6.3092	6.4983	6.5954	0.29	0.28	0.28	0
Tb927.6.2380	hypothetical protein, conserved	Mito.pathway	88	188	219	212	7	72.9	84.9	77.2	72.6	15.4	6.1878	6.4077	6.2705	6.1819	3.9449	0.94	4.73	0.94	0
Tb927.8.4930	hypothetical protein, conserved	Mito.pathway	130	258	212	262	21	107.7	116.5	74.7	89.7	46.2	6.7509	6.8642	6.223	6.487	5.5298	1.2	2.33	1.2	0
Tb927.8.4250	hypothetical protein, conserved	Mito.pathway	69	156	210	287	20	57.2	70.4	74	98.3	44	5.8379	6.1375	6.2095	6.6191	5.4594	0.58	1.3	0.58	0
Tb927.10.1930	hypothetical protein, conserved	Mito.pathway	98	217	209	178	48	81.2	98	73.6	61	105.5	6.3434	6.6147	6.2016	5.9307	6.7211	1.1	0.77	0.77	0
Tb927.11.1620	hypothetical protein, conserved	Mito.pathway	90	214	203	204	19	74.5	96.6	71.5	69.9	41.8	6.2192	6.594	6.1599	6.1272	5.3854	1.04	1.78	1.04	0
Tb927.10.2300	hypothetical protein, conserved	Mito.pathway	97	175	200	191	36	80.3	79	70.5	65.4	79.1	6.3273	6.3038	6.1396	6.0312	6.3056	1.12	1	1	0
Tb927.10.5540	hypothetical protein, conserved	Mito.pathway	68	148	195	249	32	56.3	66.8	68.7	85.3	70.4	5.8151	6.0618	6.1022	6.4145	6.1375	0.66	0.8	0.66	0
Tb927.2.2940	hypothetical protein, conserved	Mito.pathway	52	123	190	161	25	43.1	55.5	67	55.1	55	5.4296	5.7944	6.0661	5.784	5.7814	0.64	0.78	0.64	0
Tb927.10.3320	hypothetical protein, conserved	Mito.pathway	84	140	187	168	23	69.6	63.2	65.9	57.5	50.6	6.121	5.9819	6.0422	5.8455	5.6611	0.96	1.25	0.96	0
Tb927.10.11520	hypothetical protein, conserved	Mito.pathway	53	126	187	147	21	43.9	56.9	65.9	50.4	46.2	5.4561	5.8304	6.0422	5.6554	5.5298	0.67	0.95	0.67	0
Tb927.6.1890	hypothetical protein, conserved	Mito.pathway	81	194	186	192	16	67.1	87.6	65.5	65.8	35.2	6.0682	6.4529	6.0334	6.04	5.1375	1.02	1.91	1.02	0
Tb927.5.3300	hypothetical protein, conserved	Mito.pathway	48	145	184	202	25	39.8	65.5	64.8	69.2	55	5.3147	6.0334	6.0179	6.1127	5.7814	0.58	0.72	0.58	0
Tb927.8.5660	hypothetical protein, conserved	Mito.pathway	91	111	180	147	24	75.4	50.1	63.4	50.4	52.8	6.2365	5.6467	5.9864	5.6554	5.7225	0.79	0.95	0.79	0
Tb927.1.1610	hypothetical protein, conserved	Mito.pathway	81	88	173	146	12	67.1	39.7	61	50	26.4	6.0682	5.3111	5.9307	5.6439	4.7225	0.65	1.5	0.65	0
Tb927.9.3540	hypothetical protein, conserved	Mito.pathway	110	178	172	173	40	91.1	80.4	60.6	59.3	87.9	6.5094	6.3291	5.9212	5.89	6.4578	1.33	0.91	0.91	0
Tb927.6.1200	hypothetical protein, conserved	Mito.pathway	80	146	171	174	42	66.3	65.9	60.3	59.6	92.3	6.0509	6.0422	5.9141	5.8972	6.5283	1.09	0.71	0.71	0
Tb927.11.9570	hypothetical protein, conserved	Mito.pathway	66	257	170	131	10	54.7	116	59.9	44.9	22	5.7735	6.858	5.9045	5.4886	4.4594	0.91	2.49	0.91	0
Tb927.5.1130	hypothetical protein, conserved	Mito.pathway	58	102	169	153	24	48	46	59.6	52.4	52.8	5.585	5.5236	5.8972	5.7115	5.7225	0.77	0.87	0.77	0
Tb927.3.2080	hypothetical protein, conserved	Mito.pathway	61	117	169	195	41	50.5	52.8	59.6	66.8	90.1	5.6582	5.7225	5.8972	6.0618	6.4935	0.76	0.56	0.56	0
Tb927.10.9810	hypothetical protein, conserved	Mito.pathway	115	211	162	166	28	95.3	95.3	57.1	56.9	61.6	6.5744	6.5744	5.8354	5.8304	5.9449	1.67	1.55	1.55	0
Tb927.9.10070	hypothetical protein, conserved	Mito.pathway	76	110	160	131	15	63	49.7	56.4	44.9	33	5.9773	5.6352	5.8176	5.4886	5.0444	0.88	1.51	0.88	0
Tb927.4.3660	hypothetical protein, conserved	Mito.pathway	97	198	159	137	36	80.3	89.4	56	46.9	79.1	6.3273	6.4822	5.8074	5.5515	6.3056	1.43	1.02	1.02	0
Tb927.10.1660	hypothetical protein, conserved	Mito.pathway	63	120	156	143	12	52.2	54.2	55	49	26.4	5.706	5.7602	5.7814	5.6147	4.7225	0.95	1.98	0.95	0
Tb927.11.11620	hypothetical protein, conserved	Mito.pathway	70	152	156	179	35	58	68.6	55	61.3	76.9	5.858	6.1001	5.7814	5.9378	6.2649	0.95	0.75	0.75	0
Tb927.4.1760	hypothetical protein, conserved	Mito.pathway	47	134	156	138	26	38.9	60.5	55	47.3	57.2	5.2817	5.9189	5.7814	5.5638	5.8379	0.71	0.68	0.68	0
Tb927.9.7020	hypothetical protein, conserved	Mito.pathway	59	111	154	122	24	48.9	50.1	54.3	41.8	52.8	5.6118	5.6467	5.7629	5.3854	5.7225	0.9	0.93	0.9	0
Tb927.7.2690	hypothetical protein, conserved	Mito.pathway	47	121	153	123	12	38.9	54.6	53.9	42.1	26.4	5.2817	5.7708	5.7522	5.3957	4.7225	0.72	1.47	0.72	0
Tb927.11.1950	hypothetical protein, conserved	Mito.pathway	74	165	149	184	17	61.3	74.5	52.5	63	37.4	5.9378	6.2192	5.7142	5.9773	5.225	0.97	1.64	0.97	0
Tb927.10.9120	hypothetical protein, conserved	Mito.pathway	45	76	148	102	16	37.3	34.3	52.2	34.9	35.2	5.2211	5.1001	5.706	5.1252	5.1375	0.66	0.97	0.66	0
Tb927.9.6620	hypothetical protein, conserved	Mito.pathway	50	121	143	144	21	41.4	54.6	50.4	49.3	46.2	5.3716	5.7708	5.6554	5.6235	5.5298	0.82	0.9	0.82	0
Tb927.6.3360	hypothetical protein, conserved	Mito.pathway	58	85	140	126	54	48	38.4	49.3	43.2	118.7	5.585	5.263	5.6235	5.433	6.8912	0.78	0.32	0.32	0
Tb927.11.4810	hypothetical protein, conserved	Mito.pathway	61	135	135	172	15	50.5	60.9	47.6	58.9	33	5.6582	5.9284	5.5729	5.8802	5.0444	0.86	1.53	0.86	0
Tb927.8.3090	hypothetical protein, conserved	Mito.pathway	76	141	130	134	53	63	63.7	45.8	45.9	116.5	5.9773	5.9932	5.5173	5.5204	6.8642	1.37	0.54	0.54	0
Tb927.4.330	hypothetical protein, conserved	Mito.pathway	64	110	128	114	21	53	49.7	45.1	39.1	46.2	5.7279	5.6352	5.4951	5.2891	5.5298	1.1	1.08	1.08	0
Tb927.5.2810	hypothetical protein, conserved	Mito.pathway	52	99	118	119	12	43.1	44.7	41.6	40.8	26.4	5.4296	5.4822	5.3785	5.3505	4.7225	1.04	1.63	1.04	0
Tb927.10.4550	hypothetical protein, conserved	Mito.pathway	56	140	116	150	27	46.4	63.2	40.9	51.4	59.4	5.5361	5.9819	5.354	5.6837	5.8924	0.9	0.78	0.78	0
Tb927.3.3890	hypothetical protein, conserved	Mito.pathway	69	147	113	110	11	57.2	66.4	39.8	37.7	24.2	5.8379	6.0531	5.3147	5.2365	4.5969	1.44	2.36	1.44	0
Tb927.11.7250	hypothetical protein, conserved	Mito.pathway	47	112	113	100	11	38.9	50.6	39.8	34.3	24.2	5.2817	5.6611	5.3147	5.1001	4.5969	0.98	1.61	0.98	0
Tb927.9.13580	hypothetical protein, conserved	Mito.pathway	82	121	109	127	15	67.9	54.6	38.4	43.5	33	6.0853	5.7708	5.263	5.4429	5.0444	1.26	1.65	1.26	0
Tb927.3.1720	hypothetical protein, conserved	Mito.pathway	31	81	104	126	9	25.7	36.6	36.6	43.2	19.8	4.6837	5.1938	5.1938	5.433	4.3074	0.59	1.3	0.59	0
Tb927.11.12160	hypothetical protein, conserved	Mito.pathway	45	86	102	91	7	37.3	38.8	35.9	31.2	15.4	5.2211	5.278	5.1659	4.9635	3.9449	1.04	2.42	1.04	0
Tb927.9.6910	hypothetical protein, conserved	Mito.pathway	56	131	95	111	14	46.4	59.1	33.5	38	30.8	5.5361	5.8851	5.0661	5.2479	4.9449	1.22	1.51	1.22	0
Tb927.11.6470	hypothetical protein, conserved	Mito.pathway	48	154	88	85	6	39.8	69.5	31	29.1	13.2	5.3147	6.1189	4.9542	4.8629	3.7225	1.28	3.02	1.28	0
Tb927.3.3680	hypothetical protein, conserved	Mito.pathway	36	81	82	64	5	29.8	36.6	28.9	21.9	11	4.8972	5.1938	4.853	4.4529	3.4594	1.03	2.71	1.03	0
Tb927.11.13510	hypothetical protein, conserved	Mito.pathway	21	59	58	52	3	17.4	26.6	20.4	17.8	6.6	4.121	4.7334	4.3505	4.1538	2.7225	0.85	2.64	0.85	0
Tb927.9.3410	hypothetical protein, conserved	Mito.pathway	24	70	54	68	7	19.9	31.6	19	23.3	15.4	4.3147	4.9819	4.2479	4.5423	3.9449	0.85	1.29	0.85	0
Tb927.6.3350	hypothetical protein, conserved (YCF45-like)	Mito.pathway	85	182	232	245	27	70.4	82.2	81.8	83.9	59.4	6.1375	6.3611	6.354	6.3906	5.8924	0.84	1.19	0.84	0
Tb927.7.3810	hypothetical protein, conserved, , 2 Cold-shock domains	Mito.pathway	89	314	228	304	29	73.7	141.8	80.3	104.1	63.8	6.2036	7.1477	6.3273	6.7018	5.9955	0.71	1.16	0.71	0
Tb927.3.4210	hypothetical protein, conserved, dsRNA binding domain	Mito.pathway	246	381	485	369	91	203.8	172	170.9	126.4	200.1	7.671	7.4263	7.417	6.9819	7.6446	1.01	0.86	0.86	0
Tb927.10.14020	hypothetical protein, conserved, in mitochondrion	Mito.pathway	91	212	291	244	40	75.4	95.7	102.5	83.6	87.9	6.2365	6.5804	6.6795	6.3854	6.4578	0.74	0.86	0.74	0
Tb927.4.720	hypothetical protein, conserved, no clear yeast or human matches	Mito.pathway	72	171	141	184	34	59.6	77.2	49.7	63	74.7	5.8972	6.2705	5.6352	5.9773	6.223	0.95	0.8	0.8	0
Tb927.11.4330	hypothetical protein, conserved, no clear yeast or human matches	Mito.pathway	47	104	100	88	10	38.9	47	35.2	30.1	22	5.2817	5.5546	5.1375	4.9117	4.4594	1.11	1.77	1.11	0
Tb927.10.6200	hypothetical protein, conserved, no clear yeast or human matches	Mito.pathway	10	33	33	27	1	8.3	14.9	11.6	9.2	2.2	3.0531	3.8972	3.5361	3.2016	1.1375	0.72	3.77	0.72	0
Tb927.11.4870	hypothetical protein, conserved, no clear yeast or human matches, domain of unknown funciton	Mito.pathway	82	180	167	182	31	67.9	81.3	58.8	62.3	68.2	6.0853	6.3452	5.8777	5.9612	6.0917	1.09	1	1	0
Tb927.9.15270	hypothetical protein, conserved, only match is to hypothetical protein ACA1_387870 [Acanthamoeba castellanii str. Neff]	Mito.pathway	95	177	254	230	35	78.7	79.9	89.5	78.8	76.9	6.2983	6.3201	6.4838	6.3001	6.2649	0.88	1.02	0.88	0
Tb927.11.4320	hypothetical protein, conserved, PF02622 DUF179, Uncharacterized ACR, COG1678	Mito.pathway	155	422	294	302	57	128.4	190.5	103.6	103.4	125.3	7.0045	7.5736	6.6949	6.6921	6.9692	1.24	1.02	1.02	0
Tb927.1.5000	hypothetical protein, conserved, possibly mitochondrial, no yeast or human match	Mito.pathway	82	141	300	292	31	67.9	63.7	105.7	100	68.2	6.0853	5.9932	6.7238	6.6439	6.0917	0.6	0.93	0.6	0
Tb927.11.5820	hypothetical protein, conserved, probably in mitochondrion, Inhibitor of apoptosis-promoting Bax1, putative	Mito.pathway	190	408	218	272	31	157.4	184.2	76.8	93.2	68.2	7.2983	7.5251	6.263	6.5423	6.0917	1.69	2.31	1.69	0
Tb927.6.1860	hypothetical protein, conserved, prokaryotic ribosome recycling factor domain, no Sc match	Mito.pathway	85	192	224	207	50	70.4	86.7	78.9	70.9	109.9	6.1375	6.438	6.302	6.1477	6.78	0.89	0.64	0.64	0
Tb927.10.3770	hypothetical protein, conserved,predicted TPR repeat protein	Mito.pathway	111	212	475	484	68	91.9	95.7	167.4	165.8	149.5	6.522	6.5804	7.3872	7.3733	7.224	0.55	0.61	0.55	0
Tb927.4.2440	hypothetical protein, very weak match to yeast ribosomal protein RSM23	Mito.pathway	45	134	343	470	68	37.3	60.5	120.9	161	149.5	5.2211	5.9189	6.9177	7.3309	7.224	0.23	0.25	0.23	0
Tb927.1.790	hypothetical transmembrane protein, conserved	Mito.pathway	125	201	222	233	28	103.5	90.7	78.2	79.8	61.6	6.6935	6.503	6.2891	6.3183	5.9449	1.14	1.47	1.14	0
Tb927.5.500	in situ HA-tagged protein colocalizes with mitochondrion (TRitrypDB comment)	Mito.pathway	261	492	827	780	136	216.2	222.1	291.4	267.2	299	7.7562	7.7951	8.1869	8.0618	8.224	0.74	0.72	0.72	0
Tb927.8.7170	inositol polyphosphate 1-phosphatase, putative	Mito.pathway	57	193	111	125	18	47.2	87.1	39.1	42.8	39.6	5.5607	6.4446	5.2891	5.4195	5.3074	1.1	1.19	1.1	0
Tb927.5.3350	iron superoxide dismutase, putative	Mito.pathway	94	181	357	338	34	77.9	81.7	125.8	115.8	74.7	6.2836	6.3523	6.975	6.8555	6.223	0.62	1.04	0.62	0
Tb927.9.11720	iron-sulfur cluster assembly protein ISCU	Mito.pathway	217	427	429	495	143	179.7	192.8	151.2	169.6	314.4	7.4894	7.591	7.2403	7.406	8.2965	1.06	0.57	0.57	0
Tb927.10.12000	iron-sulfur cluster assembly protein, ISD11, needed foraconitatase, fumarase & thiolation of mitochodrial and cytosolic tRNA	Mito.pathway	50	108	247	235	27	41.4	48.8	87	80.5	59.4	5.3716	5.6088	6.4429	6.3309	5.8924	0.48	0.7	0.48	0
Tb927.9.14600	iron/ascorbate oxidoreductase family protein, putative	Mito.pathway	0	0	1	2	0	0	0	0.4	0.7	0			-1.3219	-0.5146		0			1
Tb927.8.5540	ISA1 mitochondrial Iron-Sulfur cluster biosynthesis	Mito.pathway	48	131	208	174	26	39.8	59.1	73.3	59.6	57.2	5.3147	5.8851	6.1957	5.8972	5.8379	0.54	0.7	0.54	0
Tb927.6.2790	L-threonine 3-dehydrogenase, putative	Mito.pathway	159	400	669	702	86	131.7	180.6	235.7	240.5	189.1	7.0411	7.4967	7.8808	7.9099	7.563	0.55	0.7	0.55	0
Tb927.8.630	lipoate-protein ligase, lipoyltransferase, lipoate biosynthesis protein, putative	Mito.pathway	84	175	183	227	41	69.6	79	64.5	77.8	90.1	6.121	6.3038	6.0112	6.2817	6.4935	0.89	0.77	0.77	0
Tb927.11.9390	lipoate-protein ligase, putative,lipoyltransferase, putative	Mito.pathway	61	127	138	131	11	50.5	57.3	48.6	44.9	24.2	5.6582	5.8405	5.6029	5.4886	4.5969	1.04	2.09	1.04	0
Tb927.9.9840	lipoic acid containing carrier protein, putative	Mito.pathway	194	403	537	622	159	160.7	181.9	189.2	213.1	349.6	7.3282	7.507	7.5638	7.7354	8.4496	0.75	0.46	0.46	0
Tb927.11.15470	methionyl-tRNA formyltransferase	Mito.pathway	102	200	216	216	49	84.5	90.3	76.1	74	107.7	6.4009	6.4967	6.2498	6.2095	6.7509	1.11	0.78	0.78	0
Tb927.8.5420	methyltransferase domain containing protein, putative	Mito.pathway	72	135	206	215	17	59.6	60.9	72.6	73.6	37.4	5.8972	5.9284	6.1819	6.2016	5.225	0.81	1.59	0.81	0
Tb927.10.5050	Mitochondrial ATP synthase epsilon subunit, putative	Mito.pathway	65	148	143	178	13	53.8	66.8	50.4	61	28.6	5.7495	6.0618	5.6554	5.9307	4.8379	0.88	1.88	0.88	0
Tb927.5.2930	Mitochondrial ATP synthase subunit, putative	Mito.pathway	263	553	506	531	82	217.8	249.7	178.3	181.9	180.3	7.7669	7.9641	7.4782	7.507	7.4943	1.2	1.21	1.2	0
Tb927.10.520	Mitochondrial ATP synthase subunit, putative	Mito.pathway	155	343	423	492	45	128.4	154.9	149.1	168.5	98.9	7.0045	7.2752	7.2201	7.3966	6.6279	0.76	1.3	0.76	0
Tb927.3.1690	Mitochondrial ATP synthase subunit, putative	Mito.pathway	74	173	398	517	54	61.3	78.1	140.2	177.1	118.7	5.9378	6.2873	7.1313	7.4684	6.8912	0.35	0.52	0.35	0
Tb927.10.8030	Mitochondrial ATP synthase subunit, putative	Mito.pathway	145	336	333	363	35	120.1	151.7	117.3	124.3	76.9	6.9081	7.2451	6.8741	6.9577	6.2649	0.97	1.56	0.97	0
Tb927.4.3450	Mitochondrial ATP synthase subunit, putative	Mito.pathway	67	209	278	300	39	55.5	94.4	98	102.8	85.7	5.7944	6.5607	6.6147	6.6837	6.4212	0.54	0.65	0.54	0
Tb927.11.6250	Mitochondrial ATP synthase subunit, putative	Mito.pathway	112	223	251	257	36	92.8	100.7	88.4	88	79.1	6.5361	6.6539	6.466	6.4594	6.3056	1.05	1.17	1.05	0
Tb927.5.3090	Mitochondrial ATP synthase subunit, putative	Mito.pathway	87	174	245	247	24	72.1	78.6	86.3	84.6	52.8	6.1719	6.2965	6.4313	6.4026	5.7225	0.84	1.37	0.84	0
Tb927.8.3320	Mitochondrial ATP synthase subunit, putative	Mito.pathway	92	156	238	266	27	76.2	70.4	83.9	91.1	59.4	6.2517	6.1375	6.3906	6.5094	5.8924	0.77	1.19	0.77	0
Tb927.3.2180	Mitochondrial ATP synthase subunit, putative	Mito.pathway	115	216	220	229	13	95.3	97.5	77.5	78.4	28.6	6.5744	6.6073	6.2761	6.2928	4.8379	1.22	3.33	1.22	0
Tb927.3.2880	Mitochondrial ATP synthase subunit, putative	Mito.pathway	41	88	205	286	48	34	39.7	72.2	98	105.5	5.0875	5.3111	6.1739	6.6147	6.7211	0.35	0.32	0.32	0
Tb927.7.840	Mitochondrial ATP synthase subunit, putative	Mito.pathway	108	185	195	224	12	89.5	83.5	68.7	76.7	26.4	6.4838	6.3837	6.1022	6.2612	4.7225	1.09	3.16	1.09	0
Tb927.2.3610	Mitochondrial ATP synthase subunit, putative	Mito.pathway	91	187	147	150	27	75.4	84.4	51.8	51.4	59.4	6.2365	6.3992	5.6949	5.6837	5.8924	1.46	1.27	1.27	0
Tb927.11.1270	Mitochondrial ATP synthase subunit, putative	Mito.pathway	130	312	144	147	21	107.7	140.9	50.7	50.4	46.2	6.7509	7.1385	5.6639	5.6554	5.5298	2.12	2.33	2.12	0
Tb927.4.3300	mitochondrial ATP-dependent zinc metallopeptidase, putative	Mito.pathway	156	348	380	390	62	129.2	157.1	133.9	133.6	136.3	7.0135	7.2955	7.065	7.0618	7.0906	0.96	0.95	0.95	0
Tb927.10.7620	mitochondrial ATP-dependent zinc metallopeptidase, putative,metallo-peptidase, Clan MA(E) Family M41	Mito.pathway	163	349	506	552	82	135	157.6	178.3	189.1	180.3	7.0768	7.3001	7.4782	7.563	7.4943	0.71	0.75	0.71	0
Tb927.8.1850	mitochondrial calcium uptake 1 MICU1	Mito.pathway	68	164	402	428	59	56.3	74	141.7	146.6	129.7	5.8151	6.2095	7.1467	7.1957	7.019	0.38	0.43	0.38	0
Tb927.7.7080	mitochondrial glycoprotein-like protein	Mito.pathway	168	224	476	455	47	139.2	101.1	167.7	155.9	103.3	7.121	6.6596	7.3897	7.2845	6.6907	0.6	0.98	0.6	0
Tb927.11.8040	Mitochondrial LSU-associated	Mito.pathway	72	178	250	250	13	59.6	80.4	88.1	85.6	28.6	5.8972	6.3291	6.4611	6.4195	4.8379	0.68	2.08	0.68	0
Tb927.11.5530	Mitochondrial LSU-associated	Mito.pathway	56	120	190	177	22	46.4	54.2	67	60.6	48.4	5.5361	5.7602	6.0661	5.9212	5.5969	0.69	0.96	0.69	0
Tb927.11.16990	Mitochondrial LSU-associated, 50S ribosome-binding GTPase	Mito.pathway	125	278	267	245	52	103.5	125.5	94.1	83.9	114.3	6.6935	6.9715	6.5561	6.3906	6.8367	1.1	0.91	0.91	0
Tb927.10.9860	Mitochondrial N(5)-glutamine methyltransferase MTQ1, putative	Mito.pathway	59	154	164	158	27	48.9	69.5	57.8	54.1	59.4	5.6118	6.1189	5.853	5.7576	5.8924	0.85	0.82	0.82	0
Tb927.6.2180	Mitochondrial SSU-associated	Mito.pathway	48	89	160	188	22	39.8	40.2	56.4	64.4	48.4	5.3147	5.3291	5.8176	6.009	5.5969	0.62	0.82	0.62	0
Tb927.7.5820	Monooxygenase, putative	Mito.pathway	82	175	206	201	33	67.9	79	72.6	68.9	72.6	6.0853	6.3038	6.1819	6.1064	6.1819	0.94	0.94	0.94	0
Tb927.11.6320	MRB1-associated protein???	Mito.pathway	211	356	462	515	32	174.8	160.7	162.8	176.4	70.4	7.4496	7.3282	7.347	7.4627	6.1375	0.91	2.28	0.91	0
Tb927.4.2520	NAD dependent deacetylase SIR2RP3, nicotinic acid mononucleotide 5,6-dimethylbenzimidazole (cobb) protein	Mito.pathway	55	122	147	139	20	45.6	55.1	51.8	47.6	44	5.511	5.784	5.6949	5.5729	5.4594	0.88	1.04	0.88	0
Tb927.8.3140	NAD dependent deacetylase, putative, SIR2RP2	Mito.pathway	41	103	202	205	15	34	46.5	71.2	70.2	33	5.0875	5.5392	6.1538	6.1334	5.0444	0.48	1.03	0.48	0
Tb927.7.4440	NAD dependent epimerase/dehydratase family, putative	Mito.pathway	64	140	149	156	18	53	63.2	52.5	53.4	39.6	5.7279	5.9819	5.7142	5.7388	5.3074	0.99	1.34	0.99	0
Tb927.4.440	NADH-ubiquinone oxidoreductase complex I subunit, putative	Mito.pathway	41	109	302	385	44	34	49.2	106.4	131.9	96.7	5.0875	5.6206	6.7334	7.0433	6.5954	0.26	0.35	0.26	0
Tb927.8.5560	NADH-ubiquinone oxidoreductase complex I subunit, putative	Mito.pathway	114	201	283	287	45	94.4	90.7	99.7	98.3	98.9	6.5607	6.503	6.6395	6.6191	6.6279	0.91	0.92	0.91	0
Tb927.10.1160	NADH-ubiquinone oxidoreductase complex I subunit, putative	Mito.pathway	88	144	242	210	40	72.9	65	85.3	71.9	87.9	6.1878	6.0224	6.4145	6.1679	6.4578	0.76	0.74	0.74	0
Tb927.1.730	NADH-ubiquinone oxidoreductase complex I subunit, putative	Mito.pathway	80	205	204	207	40	66.3	92.6	71.9	70.9	87.9	6.0509	6.5329	6.1679	6.1477	6.4578	0.92	0.75	0.75	0
Tb927.3.3660	NADH-ubiquinone oxidoreductase complex I subunit, putative	Mito.pathway	60	110	154	154	16	49.7	49.7	54.3	52.8	35.2	5.6352	5.6352	5.7629	5.7225	5.1375	0.92	1.41	0.92	0
Tb927.8.2530	NADH-ubiquinone oxidoreductase complex I subunit, putative	Mito.pathway	54	119	121	141	13	44.7	53.7	42.6	48.3	28.6	5.4822	5.7469	5.4128	5.594	4.8379	0.93	1.56	0.93	0
Tb927.9.7190	oxidoreductase, putative	Mito.pathway	106	174	361	327	26	87.8	78.6	127.2	112	57.2	6.4561	6.2965	6.991	6.8074	5.8379	0.62	1.37	0.62	0
Tb927.7.7330	oxidoreductase, putative	Mito.pathway	113	293	347	354	66	93.6	132.3	122.3	121.3	145.1	6.5484	7.0477	6.9343	6.9224	7.1809	0.77	0.65	0.65	0
Tb927.7.7410	oxidoreductase, putative	Mito.pathway	75	128	184	169	18	62.1	57.8	64.8	57.9	39.6	5.9565	5.853	6.0179	5.8555	5.3074	0.89	1.46	0.89	0
Tb927.6.2420	p22 protein precursor, interacts with UBP1 in T. cruzi	Mito.pathway	200	510	424	414	69	165.7	230.2	149.4	141.8	151.7	7.3724	7.8467	7.223	7.1477	7.2451	1.11	1.09	1.09	0
Tb927.7.3470	p22 protein precursor, putative	Mito.pathway	104	179	488	617	100	86.1	80.8	172	211.4	219.9	6.4279	6.3363	7.4263	7.7238	7.7807	0.38	0.37	0.37	0
Tb927.10.430	peroxidase, putative	Mito.pathway	89	210	407	417	60	73.7	94.8	143.4	142.8	131.9	6.2036	6.5668	7.1639	7.1579	7.0433	0.51	0.56	0.51	0
Tb927.1.740	phosphatidylinositol-4-phosphate 5-kinase related	Mito.pathway	131	264	416	450	79	108.5	119.2	146.6	154.1	173.7	6.7616	6.8972	7.1957	7.2677	7.4405	0.7	0.62	0.62	0
Tb927.11.9900	phytoene synthase, putative, complex I	Mito.pathway	122	219	324	331	44	101.1	98.9	114.2	113.4	96.7	6.6596	6.6279	6.8354	6.8253	6.5954	0.87	1.02	0.87	0
Tb927.8.6080	POMP42, Glycerophosphoryl diester phosphodiesterase family	Mito.pathway	65	143	149	177	38	53.8	64.6	52.5	60.6	83.5	5.7495	6.0135	5.7142	5.9212	6.3837	0.89	0.64	0.64	0
Tb927.4.1440	probable rRNA maturation factor YbeY, putative	Mito.pathway	29	86	77	63	7	24	38.8	27.1	21.6	15.4	4.585	5.278	4.7602	4.433	3.9449	0.89	1.56	0.89	0
Tb927.7.210	proline dehydrogenase	Mito.pathway	169	438	1039	1083	141	140	197.7	366.1	371	310	7.1293	7.6272	8.5161	8.5353	8.2761	0.38	0.45	0.38	0
Tb927.11.9750	Protein of unknown function (DUF498/DUF598), putative	Mito.pathway	151	253	398	339	75	125.1	114.2	140.2	116.1	164.9	6.9669	6.8354	7.1313	6.8592	7.3654	0.81	0.69	0.69	0
Tb927.5.1310	protoheme IX farnesyltransferase, putative	Mito.pathway	73	122	105	87	19	60.5	55.1	37	29.8	41.8	5.9189	5.784	5.2095	4.8972	5.3854	1.49	1.32	1.32	0
Tb927.8.2670	Putative S-adenosyl-L-methionine-dependent methyltransferase, putative	Mito.pathway	112	258	267	293	71	92.8	116.5	94.1	100.4	156.1	6.5361	6.8642	6.5561	6.6496	7.2863	0.92	0.59	0.59	0
Tb927.10.2680	pyridine nucleotide-disulphide oxidoreductase, putative	Mito.pathway	105	255	210	223	40	87	115.1	74	76.4	87.9	6.4429	6.8467	6.2095	6.2555	6.4578	1.14	0.99	0.99	0
Tb927.7.2440	pyrroline-5-carboxylate reductase, putative (P5CR)	Mito.pathway	115	246	319	311	48	95.3	111.1	112.4	106.5	105.5	6.5744	6.7957	6.8125	6.7347	6.7211	0.85	0.9	0.85	0
Tb927.10.770	RF-1 domain containing protein, putative	Mito.pathway	113	284	452	428	36	93.6	128.2	159.3	146.6	79.1	6.5484	7.0023	7.3156	7.1957	6.3056	0.59	1.18	0.59	0
Tb927.11.13890	RNA ligase asociated with SSU	Mito.pathway	55	105	173	173	32	45.6	47.4	61	59.3	70.4	5.511	5.5668	5.9307	5.89	6.1375	0.75	0.65	0.65	0
Tb927.3.2130	RNA pseudouridylate synthase, putative	Mito.pathway	114	200	225	209	34	94.4	90.3	79.3	71.6	74.7	6.5607	6.4967	6.3092	6.1619	6.223	1.14	1.21	1.14	0
Tb927.3.750	SET domain containing protein, putative	Mito.pathway	133	233	297	322	102	110.2	105.2	104.7	110.3	224.2	6.784	6.717	6.7101	6.7853	7.8086	0.95	0.47	0.47	0
Tb927.8.6410	short-chain dehydrogenase, putative	Mito.pathway	77	116	235	251	63	63.8	52.4	82.8	86	138.5	5.9955	5.7115	6.3716	6.4263	7.1137	0.61	0.38	0.38	0
Tb927.9.5890	solanesyl-diphosphate synthase, putative (28G16.440)	Mito.pathway	122	275	345	290	54	101.1	124.2	121.6	99.3	118.7	6.6596	6.9565	6.926	6.6337	6.8912	0.83	0.85	0.83	0
Tb927.8.6560	SpoU rRNA Methylase family, putative	Mito.pathway	153	207	143	106	11	126.7	93.5	50.4	36.3	24.2	6.9853	6.5469	5.6554	5.1819	4.5969	1.86	3.86	1.86	0
Tb927.5.520	stomatin-like protein, putative	Mito.pathway	63	124	267	199	19	52.2	56	94.1	68.2	41.8	5.706	5.8074	6.5561	6.0917	5.3854	0.55	1.25	0.55	0
Tb927.10.8630	Sucrase/ferredoxin-like, putative	Mito.pathway	113	325	402	405	68	93.6	146.7	141.7	138.7	149.5	6.5484	7.1967	7.1467	7.1158	7.224	0.66	0.63	0.63	0
Tb927.11.15820	superoxide dismutase, putative	Mito.pathway	84	186	260	249	23	69.6	84	91.6	85.3	50.6	6.121	6.3923	6.5173	6.4145	5.6611	0.76	1.38	0.76	0
Tb927.11.4680	SURF1 family, putative	Mito.pathway	97	296	233	250	65	80.3	133.6	82.1	85.6	142.9	6.3273	7.0618	6.3593	6.4195	7.1589	0.94	0.56	0.56	0
Tb927.11.6660	Tex-like protein N-terminal domain/Helix-hairpin-helix motif containing protein, putative	Mito.pathway	147	253	627	691	50	121.8	114.2	220.9	236.7	109.9	6.9284	6.8354	7.7872	7.8869	6.78	0.48	1.04	0.48	0
Tb927.10.11900	thioredoxin, putative	Mito.pathway	79	111	202	221	51	65.4	50.1	71.2	75.7	112.1	6.0312	5.6467	6.1538	6.2422	6.8086	0.66	0.45	0.45	0
Tb927.7.2200	Tim10/DDP family zinc finger, putative	Mito.pathway	35	89	216	262	64	29	40.2	76.1	89.7	140.7	4.858	5.3291	6.2498	6.487	7.1365	0.32	0.21	0.21	0
Tb927.5.3340	Tim10/DDP family zinc finger, putative	Mito.pathway	27	51	60	77	8	22.4	23	21.1	26.4	17.6	4.4854	4.5236	4.3992	4.7225	4.1375	0.85	1.27	0.85	0
Tb927.9.12770	TPR repeat protein	Mito.pathway	152	276	353	399	35	125.9	124.6	124.4	136.7	76.9	6.9761	6.9612	6.9588	7.0949	6.2649	0.91	1.62	0.91	0
Tb927.1.840	transmembrane protein, putative	Mito.pathway	97	204	286	359	54	80.3	92.1	100.8	123	118.7	6.3273	6.5251	6.6554	6.9425	6.8912	0.65	0.68	0.65	0
Tb927.9.4310	tricarboxylate carrier, putative	Mito.pathway	40	65	135	178	23	33.1	29.3	47.6	61	50.6	5.0488	4.8728	5.5729	5.9307	5.6611	0.48	0.58	0.48	0
Tb927.11.10510	ubiquinone biosynthesis methyltransferase, putative	Mito.pathway	142	411	375	361	95	117.6	185.6	132.1	123.7	208.9	6.8777	7.5361	7.0455	6.9507	7.7067	0.89	0.56	0.56	0
Tb927.3.4890	ubiquinone biosynthesis protein COQ7 homolog, putative	Mito.pathway	85	210	135	137	23	70.4	94.8	47.6	46.9	50.6	6.1375	6.5668	5.5729	5.5515	5.6611	1.48	1.39	1.39	0
Tb927.11.13580	ubiquinone biosynthesis protein-like protein	Mito.pathway	103	216	422	422	48	85.3	97.5	148.7	144.6	105.5	6.4145	6.6073	7.2163	7.1759	6.7211	0.57	0.81	0.57	0
Tb927.7.3770	YjeF family N-terminal domain/YjeF family C-terminal domain containing protein, putative	Mito.pathway	123	288	281	281	39	101.9	130	99	96.3	85.7	6.671	7.0224	6.6294	6.5895	6.4212	1.03	1.19	1.03	0
Tb927.8.3830	ATP-dependent DEAD/H RNA helicase, putative,mitochondrial	Mito.RNA	90	158	185	156	13	74.5	71.3	65.2	53.4	28.6	6.2192	6.1558	6.0268	5.7388	4.8379	1.09	2.49	1.09	0
Tb927.4.3020	ATP-dependent DEAH-box RNA helicase, putative	Mito.RNA	190	266	373	353	73	157.4	120.1	131.4	120.9	160.5	7.2983	6.9081	7.0378	6.9177	7.3264	0.91	0.75	0.75	0
Tb927.11.7218	Component of mitochondrial complex containing the MERS1 NUDIX hydrolase	Mito.RNA	148	299	574	619	79	122.6	135	202.3	212	173.7	6.9378	7.0768	7.6604	7.7279	7.4405	0.58	0.71	0.58	0
Tb927.2.2570	GAP2	Mito.RNA	28	53	87	96	13	23.2	23.9	30.7	32.9	28.6	4.5361	4.5789	4.9402	5.04	4.8379	0.71	0.81	0.71	0
Tb927.7.2570	guide RNA associated protein, GAP2	Mito.RNA	110	299	480	481	59	91.1	135	169.1	164.8	129.7	6.5094	7.0768	7.4017	7.3646	7.019	0.54	0.7	0.54	0
Tb927.6.2140	hypothetical protein, conserved	Mito.RNA	65	165	144	140	35	53.8	74.5	50.7	48	76.9	5.7495	6.2192	5.6639	5.585	6.2649	1.06	0.7	0.7	0
Tb927.11.15850	kinetoplast poly(A) polymerase complex 1 subunit	Mito.RNA	286	698	1207	1274	151	236.9	315.1	425.3	436.4	332	7.8881	8.2997	8.7323	8.7695	8.375	0.54	0.71	0.54	0
Tb927.11.1250	kinetoplast poly(A) polymerase complex 1 subunit, MIT ssu-associated	Mito.RNA	194	298	461	454	71	160.7	134.5	162.4	155.5	156.1	7.3282	7.0715	7.3434	7.2808	7.2863	0.83	0.86	0.83	0
Tb927.2.3180	kinetoplast polyadenylation/uridylation factor 1 (KPAF1)	Mito.RNA	191	402	706	728	85	158.2	181.5	248.8	249.4	186.9	7.3056	7.5038	7.9588	7.9623	7.5461	0.63	0.85	0.63	0
Tb927.11.14380	Kinetoplast polyadenylation/uridylation factor 2	Mito.RNA	125	261	430	409	47	103.5	117.8	151.5	140.1	103.3	6.6935	6.8802	7.2432	7.1303	6.6907	0.68	1	0.68	0
Tb927.8.6040	Kinetoplast ribosomal PPR-repeat containing protein 11	Mito.RNA	101	213	143	152	32	83.7	96.2	50.4	52.1	70.4	6.3872	6.588	5.6554	5.7032	6.1375	1.61	1.19	1.19	0
Tb927.11.7960	kPAP kinetoplast poly(A) polymerase 1	Mito.RNA	125	234	435	437	30	103.5	105.6	153.3	149.7	66	6.6935	6.7225	7.2602	7.2259	6.0444	0.68	1.57	0.68	0
Tb927.10.160	KPAP2 Kinetoplast poly(A) polymerase	Mito.RNA	92	127	483	533	74	76.2	57.3	170.2	182.6	162.7	6.2517	5.8405	7.4111	7.5125	7.3461	0.31	0.35	0.31	0
Tb927.9.4360	KREL1	Mito.RNA	83	221	198	212	27	68.8	99.8	69.8	72.6	59.4	6.1043	6.641	6.1252	6.1819	5.8924	0.95	1.16	0.95	0
Tb927.1.3030	KREL2	Mito.RNA	181	350	326	367	84	149.9	158	114.9	125.7	184.7	7.2279	7.3038	6.8442	6.9738	7.529	1.19	0.81	0.81	0
Tb927.10.8210	KREPA2	Mito.RNA	149	302	274	243	28	123.4	136.3	96.6	83.2	61.6	6.9472	7.0906	6.594	6.3785	5.9449	1.28	2	1.28	0
Tb927.8.620	KREPA3	Mito.RNA	88	166	192	200	36	72.9	74.9	67.7	68.5	79.1	6.1878	6.2269	6.0811	6.098	6.3056	1.06	0.92	0.92	0
Tb927.10.5110	KREPA4	Mito.RNA	115	233	305	330	36	95.3	105.2	107.5	113	79.1	6.5744	6.717	6.7482	6.8202	6.3056	0.84	1.2	0.84	0
Tb927.8.680	KREPA5	Mito.RNA	42	95	71	72	10	34.8	42.9	25	24.7	22	5.121	5.4229	4.6439	4.6264	4.4594	1.39	1.58	1.39	0
Tb927.10.5120	KREPA6	Mito.RNA	93	132	280	261	32	77	59.6	98.7	89.4	70.4	6.2668	5.8972	6.625	6.4822	6.1375	0.6	0.85	0.6	0
Tb927.11.2990	KREPB4	Mito.RNA	62	148	176	105	14	51.4	66.8	62	36	30.8	5.6837	6.0618	5.9542	5.1699	4.9449	0.83	1.67	0.83	0
Tb927.11.940	KREPB5	Mito.RNA	85	180	131	87	9	70.4	81.3	46.2	29.8	19.8	6.1375	6.3452	5.5298	4.8972	4.3074	1.52	3.56	1.52	0
Tb927.3.3990	KREPB6	Mito.RNA	69	149	414	495	59	57.2	67.3	145.9	169.6	129.7	5.8379	6.0725	7.1888	7.406	7.019	0.34	0.44	0.34	0
Tb927.9.5630	KREPB7	Mito.RNA	102	143	210	263	28	84.5	64.6	74	90.1	61.6	6.4009	6.0135	6.2095	6.4935	5.9449	0.72	1.05	0.72	0
Tb927.8.5690	KREPB8	Mito.RNA	46	94	138	125	12	38.1	42.4	48.6	42.8	26.4	5.2517	5.406	5.6029	5.4195	4.7225	0.78	1.44	0.78	0
Tb927.7.1550	KRET2	Mito.RNA	91	193	296	269	38	75.4	87.1	104.3	92.1	83.5	6.2365	6.4446	6.7046	6.5251	6.3837	0.72	0.9	0.72	0
Tb927.7.1070	KREX1	Mito.RNA	146	285	362	336	54	120.9	128.7	127.6	115.1	118.7	6.9177	7.0079	6.9955	6.8467	6.8912	0.95	1.02	0.95	0
Tb927.10.3570	KREX2	Mito.RNA	117	277	349	346	44	96.9	125.1	123	118.5	96.7	6.5984	6.9669	6.9425	6.8887	6.5954	0.79	1	0.79	0
Tb927.11.8870	mitochondrial DEAD box protein,KREH1 (KREH1)	Mito.RNA	103	196	310	331	54	85.3	88.5	109.2	113.4	118.7	6.4145	6.4676	6.7708	6.8253	6.8912	0.75	0.72	0.72	0
Tb927.11.5780	mitochondrial DNA-directed RNA polymerase (MTRNAP)	Mito.RNA	239	389	543	494	83	198	175.6	191.3	169.2	182.5	7.6294	7.4561	7.5797	7.4026	7.5118	0.92	0.96	0.92	0
Tb927.1.1330	Mitochondrial Editosome-like Complex TUTase (MEAT1)	Mito.RNA	91	192	185	165	27	75.4	86.7	65.2	56.5	59.4	6.2365	6.438	6.0268	5.8202	5.8924	1.16	1.27	1.16	0
Tb927.9.7210	mitochondrial exoribonuclease DSS-1	Mito.RNA	83	183	197	187	46	68.8	82.6	69.4	64.1	101.1	6.1043	6.3681	6.1169	6.0023	6.6596	0.99	0.68	0.68	0
Tb927.10.6850	Mitochondrial ribosomal protein S18, putative (MRPS18)	Mito.RNA	105	222	523	608	161	87	100.2	184.3	208.3	354	6.4429	6.6467	7.5259	7.7025	8.4676	0.42	0.25	0.25	0
Tb927.11.15640	mitochondrial RNA binding complex 1 subunit (MERS1)	Mito.RNA	81	170	252	216	17	67.1	76.7	88.8	74	37.4	6.0682	6.2612	6.4725	6.2095	5.225	0.76	1.79	0.76	0
Tb927.11.9140	mitochondrial RNA binding complex 1 subunit (MRB0880)	Mito.RNA	50	95	143	140	39	41.4	42.9	50.4	48	85.7	5.3716	5.4229	5.6554	5.585	6.4212	0.82	0.48	0.48	0
Tb927.10.10130	mitochondrial RNA binding complex 1 subunit (MRB10130)	Mito.RNA	94	194	275	248	42	77.9	87.6	96.9	85	92.3	6.2836	6.4529	6.5984	6.4094	6.5283	0.8	0.84	0.8	0
Tb927.3.1590	mitochondrial RNA binding complex 1 subunit (MRB1590)	Mito.RNA	117	226	243	203	28	96.9	102	85.6	69.5	61.6	6.5984	6.6724	6.4195	6.1189	5.9449	1.13	1.57	1.13	0
Tb927.3.1820	mitochondrial RNA binding complex 1 subunit (MRB1820)	Mito.RNA	71	150	237	250	11	58.8	67.7	83.5	85.6	24.2	5.8777	6.0811	6.3837	6.4195	4.5969	0.69	2.43	0.69	0
Tb927.2.1860	mitochondrial RNA binding complex 1 subunit (MRB1860)	Mito.RNA	115	221	412	466	110	95.3	99.8	145.2	159.6	241.8	6.5744	6.641	7.1819	7.3183	7.9177	0.6	0.39	0.39	0
Tb927.4.4150	mitochondrial RNA binding complex 1 subunit (MRB4150)	Mito.RNA	212	453	891	861	104	175.6	204.5	314	294.9	228.6	7.4561	7.676	8.2946	8.2041	7.8367	0.56	0.77	0.56	0
Tb927.2.6070	mitochondrial RNA binding complex 1 subunit (MRB6070)	Mito.RNA	131	281	267	268	54	108.5	126.9	94.1	91.8	118.7	6.7616	6.9875	6.5561	6.5204	6.8912	1.15	0.91	0.91	0
Tb927.7.800	mitochondrial RNA binding complex 1 subunit (MRB800)	Mito.RNA	110	190	319	249	38	91.1	85.8	112.4	85.3	83.5	6.5094	6.4229	6.8125	6.4145	6.3837	0.76	1.03	0.76	0
Tb927.10.11870	mitochondrial RNA binding protein (MRB11870)	Mito.RNA	88	180	210	232	41	72.9	81.3	74	79.5	90.1	6.1878	6.3452	6.2095	6.3129	6.4935	0.92	0.81	0.81	0
Tb927.11.16860	mitochondrial RNA binding protein (MRB8620)	Mito.RNA	70	175	123	117	14	58	79	43.3	40.1	30.8	5.858	6.3038	5.4363	5.3255	4.9449	1.34	1.88	1.34	0
Tb927.8.2740	mitochondrial RNA binding protein (TbRBP38)	Mito.RNA	148	275	348	484	53	122.6	124.2	122.6	165.8	116.5	6.9378	6.9565	6.9378	7.3733	6.8642	0.74	1.05	0.74	0
Tb927.11.5500	mitochondrial RNA binding protein 1 KRIPP1 (PPR)	Mito.RNA	111	188	246	214	21	91.9	84.9	86.7	73.3	46.2	6.522	6.4077	6.438	6.1957	5.5298	0.98	1.84	0.98	0
Tb927.11.1710	mitochondrial RNA binding protein 1,gBP21, MRP1 (GBP21)	Mito.RNA	358	559	752	643	90	296.5	252.4	265	220.3	197.9	8.2119	7.9796	8.0498	7.7833	7.6286	0.95	1.28	0.95	0
Tb927.11.7900	mitochondrial RNA binding protein 16 (RBP16)	Mito.RNA	248	533	449	440	36	205.4	240.6	158.2	150.7	79.1	7.6823	7.9105	7.3056	7.2355	6.3056	1.3	2.6	1.3	0
Tb927.11.13280	mitochondrial RNA binding protein 2 (GBP25)	Mito.RNA	315	548	415	542	83	260.9	247.4	146.2	185.7	182.5	8.0274	7.9507	7.1918	7.5368	7.5118	1.33	1.36	1.33	0
Tb927.11.8400	Mitochondrial RNA processing endonuclease 1 (mRPN1)	Mito.RNA	104	180	298	307	39	86.1	81.3	105	105.2	85.7	6.4279	6.3452	6.7142	6.717	6.4212	0.77	0.95	0.77	0
Tb927.11.2530	Mitochondrial SSU ribosomal protein, putative	Mito.RNA	131	260	438	382	46	108.5	117.4	154.3	130.9	101.1	6.7616	6.8753	7.2696	7.0323	6.6596	0.7	1.07	0.7	0
Tb927.5.3010	MRB1 complex subunit MRB3010 (MRB3010)	Mito.RNA	95	186	251	234	24	78.7	84	88.4	80.2	52.8	6.2983	6.3923	6.466	6.3255	5.7225	0.89	1.49	0.89	0
Tb11.02.5390	mRNA processing protein, putative	Mito.RNA	148	216	371	354	52	122.6	97.5	130.7	121.3	114.3	6.9378	6.6073	7.0301	6.9224	6.8367	0.75	0.85	0.75	0
Tb927.1.3010	mRNA processing protein, putative	Mito.RNA	86	152	194	197	28	71.2	68.6	68.4	67.5	61.6	6.1538	6.1001	6.0959	6.0768	5.9449	1	1.11	1	0
Tb927.2.3800	mRNA processing protein, putative GAP1 MRB complex protein	Mito.RNA	137	314	501	509	51	113.5	141.8	176.5	174.4	112.1	6.8265	7.1477	7.4635	7.4463	6.8086	0.64	1.01	0.64	0
Tb927.11.15650	poly(A) polymerase, mitochondrial, putative	Mito.RNA	71	154	241	215	45	58.8	69.5	84.9	73.6	98.9	5.8777	6.1189	6.4077	6.2016	6.6279	0.69	0.59	0.59	0
Tb927.10.10830	RGG2, MRB complex component	Mito.RNA	146	344	365	344	58	120.9	155.3	128.6	117.8	127.5	6.9177	7.2789	7.0067	6.8802	6.9944	0.94	0.95	0.94	0
Tb927.5.1710	ribonucleoprotein p18, mitochondrial precursor, putative	Mito.RNA	128	335	598	740	107	106	151.2	210.7	253.5	235.2	6.7279	7.2403	7.719	7.9858	7.8777	0.42	0.45	0.42	0
Tb927.4.1500	RNA editing associated helicase 2 (REH2) MRB 1 subunit	Mito.RNA	407	546	930	888	154	337.1	246.5	327.7	304.2	338.6	8.397	7.9454	8.3562	8.2489	8.4034	0.75	0.73	0.73	0
Tb927.1.1690	RNA editing endoribonuclease (KREN1)	Mito.RNA	103	246	300	331	25	85.3	111.1	105.7	113.4	55	6.4145	6.7957	6.7238	6.8253	5.7814	0.75	1.55	0.75	0
Tb927.10.5440	RNA editing endoribonuclease (KREN2)	Mito.RNA	121	172	210	213	16	100.2	77.7	74	73	35.2	6.6467	6.2798	6.2095	6.1898	5.1375	1.05	2.21	1.05	0
Tb927.10.5320	RNA editing endoribonuclease (KREN3)	Mito.RNA	90	206	384	424	56	74.5	93	135.3	145.2	123.1	6.2192	6.5392	7.08	7.1819	6.9437	0.51	0.61	0.51	0
Tb927.4.1990	RNA helicase, SUV3 homologue, putative,in mitochondrion	Mito.RNA	122	199	383	357	49	101.1	89.8	135	122.3	107.7	6.6596	6.4886	7.0768	6.9343	6.7509	0.67	0.83	0.67	0
Tb927.7.3950	RNA-editing 3' terminal uridylyl transferase 1,KRET1 (KRET1)	Mito.RNA	166	347	659	619	64	137.5	156.7	232.2	212	140.7	7.1033	7.2919	7.8592	7.7279	7.1365	0.59	0.98	0.59	0
Tb927.2.2470	RNA-editing complex protein,KREPA1 (KREPA1)	Mito.RNA	144	217	326	303	55	119.3	98	114.9	103.8	120.9	6.8985	6.6147	6.8442	6.6977	6.9177	0.85	0.81	0.81	0
Tb927.9.12720	RND, guide RNA metabolism	Mito.RNA	62	160	207	173	25	51.4	72.2	72.9	59.3	55	5.6837	6.1739	6.1878	5.89	5.7814	0.71	0.93	0.71	0
Tb927.6.2230	TbRGG1	Mito.RNA	490	1073	2529	2014	162	405.9	484.4	891.2	689.9	356.2	8.665	8.9201	9.7996	9.4302	8.4765	0.46	1.14	0.46	0
Tb927.4.750	50S ribosomal protein L7Ae, putative	Mito.translation	124	244	414	555	53	102.7	110.2	145.9	190.1	116.5	6.6823	6.784	7.1888	7.5706	6.8642	0.54	0.88	0.54	0
Tb927.4.2720	ATP dependent DEAD-box helicase (RH)	Mito.translation	116	225	513	553	107	96.1	101.6	180.8	189.4	235.2	6.5865	6.6668	7.4983	7.5653	7.8777	0.51	0.41	0.41	0
Tb927.6.2480	chaperone protein DNAj, associated with Mitchondrial LSU ribosome	Mito.translation	117	263	273	238	21	96.9	118.7	96.2	81.5	46.2	6.5984	6.8912	6.588	6.3487	5.5298	1.01	2.1	1.01	0
Tb927.10.5010	EF-G1 Mitochondrial elongation factor G	Mito.translation	279	447	1289	1589	129	231.1	201.8	454.2	544.3	283.6	7.8524	7.6568	8.8272	9.0883	8.1477	0.37	0.71	0.37	0
Tb927.3.3630	EF-TS Mitochondrial elongation factor ts	Mito.translation	51	95	130	108	23	42.2	42.9	45.8	37	50.6	5.3992	5.4229	5.5173	5.2095	5.6611	0.92	0.83	0.83	0
Tb927.10.13360	EF-Tu Mitochondrial elongation factor Tu	Mito.translation	206	329	467	476	51	170.6	148.5	164.6	163.1	112.1	7.4145	7.2143	7.3628	7.3496	6.8086	0.9	1.32	0.9	0
Tb927.3.4550	KRIPP6/TbPPR6 Kinetoplast ribosomal PPR-repeat containing protein	Mito.translation	86	190	237	211	28	71.2	85.8	83.5	72.3	61.6	6.1538	6.4229	6.3837	6.1759	5.9449	0.85	1.16	0.85	0
Tb927.4.4720	KRIPP7/TbPPR7 Kinetoplast ribosomal PPR-repeat containing protein	Mito.translation	63	127	108	114	13	52.2	57.3	38.1	39.1	28.6	5.706	5.8405	5.2517	5.2891	4.8379	1.34	1.83	1.34	0
Tb927.3.1710	Mitchondrial LSU ribosomal protein	Mito.translation	115	246	531	654	63	95.3	111.1	187.1	224	138.5	6.5744	6.7957	7.5477	7.8074	7.1137	0.43	0.69	0.43	0
Tb927.11.4650	Mitchondrial LSU ribosomal protein	Mito.translation	248	475	412	353	40	205.4	214.4	145.2	120.9	87.9	7.6823	7.7442	7.1819	6.9177	6.4578	1.41	2.34	1.41	0
Tb927.8.1880	Mitchondrial LSU ribosomal protein	Mito.translation	158	343	398	476	40	130.9	154.9	140.2	163.1	87.9	7.0323	7.2752	7.1313	7.3496	6.4578	0.8	1.49	0.8	0
Tb927.7.3460	Mitchondrial LSU ribosomal protein	Mito.translation	121	255	395	418	42	100.2	115.1	139.2	143.2	92.3	6.6467	6.8467	7.121	7.1619	6.5283	0.7	1.09	0.7	0
Tb927.8.2760	Mitchondrial LSU ribosomal protein	Mito.translation	107	180	373	313	38	88.6	81.3	131.4	107.2	83.5	6.4692	6.3452	7.0378	6.7442	6.3837	0.62	0.97	0.62	0
Tb927.5.2070	Mitchondrial LSU ribosomal protein	Mito.translation	122	251	369	279	62	101.1	113.3	130	95.6	136.3	6.6596	6.824	7.0224	6.5789	7.0906	0.78	0.74	0.74	0
Tb927.8.3170	Mitchondrial LSU ribosomal protein	Mito.translation	124	319	360	335	33	102.7	144	126.9	114.8	72.6	6.6823	7.1699	6.9875	6.843	6.1819	0.81	1.41	0.81	0
Tb927.7.3510	Mitchondrial LSU ribosomal protein	Mito.translation	121	189	340	291	45	100.2	85.3	119.8	99.7	98.9	6.6467	6.4145	6.9045	6.6395	6.6279	0.71	0.86	0.71	0
Tb927.11.5990	Mitchondrial LSU ribosomal protein	Mito.translation	90	167	336	299	60	74.5	75.4	118.4	102.4	131.9	6.2192	6.2365	6.8875	6.6781	7.0433	0.63	0.56	0.56	0
Tb927.9.14050	Mitchondrial LSU ribosomal protein	Mito.translation	109	165	333	254	40	90.3	74.5	117.3	87	87.9	6.4967	6.2192	6.8741	6.4429	6.4578	0.64	0.85	0.64	0
Tb927.11.1630	Mitchondrial LSU ribosomal protein	Mito.translation	151	297	332	370	94	125.1	134.1	117	126.7	206.7	6.9669	7.0672	6.8704	6.9853	7.6914	0.99	0.61	0.61	0
Tb927.10.600	Mitchondrial LSU ribosomal protein	Mito.translation	119	231	319	299	46	98.6	104.3	112.4	102.4	101.1	6.6235	6.7046	6.8125	6.6781	6.6596	0.88	0.98	0.88	0
Tb927.11.10570	Mitchondrial LSU ribosomal protein	Mito.translation	101	149	311	321	46	83.7	67.3	109.6	110	101.1	6.3872	6.0725	6.7761	6.7814	6.6596	0.61	0.67	0.61	0
Tb927.5.3870	Mitchondrial LSU ribosomal protein	Mito.translation	112	254	303	290	52	92.8	114.7	106.8	99.3	114.3	6.5361	6.8417	6.7388	6.6337	6.8367	0.87	0.81	0.81	0
Tb927.4.1810	Mitchondrial LSU ribosomal protein	Mito.translation	102	193	303	292	46	84.5	87.1	106.8	100	101.1	6.4009	6.4446	6.7388	6.6439	6.6596	0.79	0.84	0.79	0
Tb927.6.3600	Mitchondrial LSU ribosomal protein	Mito.translation	172	330	266	258	119	142.5	149	93.7	88.4	261.6	7.1548	7.2192	6.55	6.466	8.0312	1.52	0.54	0.54	0
Tb927.11.5880	Mitchondrial LSU ribosomal protein	Mito.translation	99	180	264	291	32	82	81.3	93	99.7	70.4	6.3576	6.3452	6.5392	6.6395	6.1375	0.82	1.15	0.82	0
Tb927.5.4120	Mitchondrial LSU ribosomal protein	Mito.translation	108	226	261	241	20	89.5	102	92	82.6	44	6.4838	6.6724	6.5236	6.3681	5.4594	0.97	2.03	0.97	0
Tb927.6.4080	Mitchondrial LSU ribosomal protein	Mito.translation	95	234	261	248	26	78.7	105.6	92	85	57.2	6.2983	6.7225	6.5236	6.4094	5.8379	0.86	1.38	0.86	0
Tb927.11.14980	Mitchondrial LSU ribosomal protein	Mito.translation	95	156	256	219	23	78.7	70.4	90.2	75	50.6	6.2983	6.1375	6.4951	6.2288	5.6611	0.78	1.39	0.78	0
Tb927.6.4200	Mitchondrial LSU ribosomal protein	Mito.translation	116	202	255	248	25	96.1	91.2	89.9	85	55	6.5865	6.511	6.4902	6.4094	5.7814	1.01	1.66	1.01	0
Tb927.9.3640	Mitchondrial LSU ribosomal protein	Mito.translation	100	149	252	220	17	82.8	67.3	88.8	75.4	37.4	6.3716	6.0725	6.4725	6.2365	5.225	0.76	1.8	0.76	0
Tb927.7.4550	Mitchondrial LSU ribosomal protein	Mito.translation	82	268	250	277	40	67.9	121	88.1	94.9	87.9	6.0853	6.9189	6.4611	6.5683	6.4578	0.72	0.77	0.72	0
Tb927.11.9830	Mitchondrial LSU ribosomal protein	Mito.translation	70	138	245	295	32	58	62.3	86.3	101.1	70.4	5.858	5.9612	6.4313	6.6596	6.1375	0.57	0.82	0.57	0
Tb927.3.820	Mitchondrial LSU ribosomal protein	Mito.translation	70	121	232	212	23	58	54.6	81.8	72.6	50.6	5.858	5.7708	6.354	6.1819	5.6611	0.67	1.08	0.67	0
Tb927.5.3980	Mitchondrial LSU ribosomal protein	Mito.translation	102	149	231	242	45	84.5	67.3	81.4	82.9	98.9	6.4009	6.0725	6.347	6.3733	6.6279	0.81	0.68	0.68	0
Tb927.6.4040	Mitchondrial LSU ribosomal protein	Mito.translation	54	182	229	217	17	44.7	82.2	80.7	74.3	37.4	5.4822	6.3611	6.3345	6.2153	5.225	0.55	1.2	0.55	0
Tb927.8.3300	Mitchondrial LSU ribosomal protein	Mito.translation	120	208	212	222	43	99.4	93.9	74.7	76	94.5	6.6352	6.5531	6.223	6.2479	6.5622	1.24	0.99	0.99	0
Tb927.6.3930	Mitchondrial LSU ribosomal protein	Mito.translation	73	172	211	244	41	60.5	77.7	74.4	83.6	90.1	5.9189	6.2798	6.2172	6.3854	6.4935	0.72	0.67	0.67	0
Tb927.7.4710	Mitchondrial LSU ribosomal protein	Mito.translation	74	190	208	167	31	61.3	85.8	73.3	57.2	68.2	5.9378	6.4229	6.1957	5.8379	6.0917	0.84	0.9	0.84	0
Tb927.11.870	Mitchondrial LSU ribosomal protein	Mito.translation	77	157	207	228	21	63.8	70.9	72.9	78.1	46.2	5.9955	6.1477	6.1878	6.2873	5.5298	0.82	1.38	0.82	0
Tb927.5.3410	Mitchondrial LSU ribosomal protein	Mito.translation	69	124	202	198	31	57.2	56	71.2	67.8	68.2	5.8379	5.8074	6.1538	6.0832	6.0917	0.79	0.82	0.79	0
Tb927.11.10170	Mitchondrial LSU ribosomal protein	Mito.translation	67	191	202	142	23	55.5	86.2	71.2	48.6	50.6	5.7944	6.4296	6.1538	5.6029	5.6611	0.78	1.1	0.78	0
Tb927.11.15500	Mitchondrial LSU ribosomal protein	Mito.translation	90	180	197	210	27	74.5	81.3	69.4	71.9	59.4	6.2192	6.3452	6.1169	6.1679	5.8924	1.04	1.25	1.04	0
Tb927.7.2760	Mitchondrial LSU ribosomal protein	Mito.translation	69	108	196	163	29	57.2	48.8	69.1	55.8	63.8	5.8379	5.6088	6.1106	5.8022	5.9955	0.71	0.76	0.71	0
Tb927.9.8290	Mitchondrial LSU ribosomal protein	Mito.translation	52	98	191	177	15	43.1	44.2	67.3	60.6	33	5.4296	5.466	6.0725	5.9212	5.0444	0.64	1.31	0.64	0
Tb927.10.12050	Mitchondrial LSU ribosomal protein	Mito.translation	104	212	175	190	18	86.1	95.7	61.7	65.1	39.6	6.4279	6.5804	5.9472	6.0246	5.3074	1.32	2.17	1.32	0
Tb927.10.11050	Mitchondrial LSU ribosomal protein	Mito.translation	76	197	170	145	15	63	88.9	59.9	49.7	33	5.9773	6.4741	5.9045	5.6352	5.0444	1.05	1.91	1.05	0
Tb927.10.1870	Mitchondrial LSU ribosomal protein	Mito.translation	66	129	157	178	15	54.7	58.2	55.3	61	33	5.7735	5.8629	5.7892	5.9307	5.0444	0.9	1.66	0.9	0
Tb927.7.7010	Mitchondrial LSU ribosomal protein	Mito.translation	45	89	153	154	16	37.3	40.2	53.9	52.8	35.2	5.2211	5.3291	5.7522	5.7225	5.1375	0.69	1.06	0.69	0
Tb927.10.11350	Mitchondrial LSU ribosomal protein	Mito.translation	40	61	148	165	10	33.1	27.5	52.2	56.5	22	5.0488	4.7814	5.706	5.8202	4.4594	0.49	1.25	0.49	0
Tb927.11.10080	Mitchondrial LSU ribosomal protein	Mito.translation	49	169	144	141	17	40.6	76.3	50.7	48.3	37.4	5.3434	6.2536	5.6639	5.594	5.225	0.8	1.09	0.8	0
Tb927.5.3110	Mitchondrial LSU ribosomal protein	Mito.translation	62	105	142	148	17	51.4	47.4	50	50.7	37.4	5.6837	5.5668	5.6439	5.6639	5.225	0.93	1.27	0.93	0
Tb927.10.7380	Mitchondrial LSU ribosomal protein	Mito.translation	89	172	138	105	8	73.7	77.7	48.6	36	17.6	6.2036	6.2798	5.6029	5.1699	4.1375	1.52	4.19	1.52	0
Tb927.7.4140	Mitchondrial LSU ribosomal protein	Mito.translation	62	107	132	153	17	51.4	48.3	46.5	52.4	37.4	5.6837	5.594	5.5392	5.7115	5.225	0.92	1.29	0.92	0
Tb927.4.4610	Mitchondrial LSU ribosomal protein	Mito.translation	74	117	130	116	8	61.3	52.8	45.8	39.7	17.6	5.9378	5.7225	5.5173	5.3111	4.1375	1.15	3	1.15	0
Tb927.11.10050	Mitchondrial LSU ribosomal protein	Mito.translation	62	151	118	102	18	51.4	68.2	41.6	34.9	39.6	5.6837	6.0917	5.3785	5.1252	5.3074	1.24	1.3	1.24	0
Tb927.11.11630	Mitchondrial LSU ribosomal protein	Mito.translation	46	122	117	128	20	38.1	55.1	41.2	43.8	44	5.2517	5.784	5.3646	5.4529	5.4594	0.87	0.87	0.87	0
Tb927.11.3640	Mitchondrial LSU ribosomal protein	Mito.translation	50	87	117	149	14	41.4	39.3	41.2	51	30.8	5.3716	5.2965	5.3646	5.6724	4.9449	0.77	1.28	0.77	0
Tb927.6.1440	Mitchondrial LSU ribosomal protein	Mito.translation	68	176	109	110	8	56.3	79.5	38.4	37.7	17.6	5.8151	6.3129	5.263	5.2365	4.1375	1.47	3.2	1.47	0
Tb927.7.6800	Mitchondrial LSU ribosomal protein	Mito.translation	90	172	36	40	17	74.5	77.7	12.7	13.7	37.4	6.2192	6.2798	3.6668	3.7761	5.225	5.44	1.99	1.99	0
Tb927.8.5860	Mitchondrial LSU ribosomal protein 50S ribosomal protein L17, putative	Mito.translation	78	171	277	247	34	64.6	77.2	97.6	84.6	74.7	6.0135	6.2705	6.6088	6.4026	6.223	0.66	0.86	0.66	0
Tb927.4.1070	Mitchondrial LSU ribosomal protein L13, putative	Mito.translation	56	119	112	108	18	46.4	53.7	39.5	37	39.6	5.5361	5.7469	5.3038	5.2095	5.3074	1.17	1.17	1.17	0
Tb927.4.930	Mitchondrial LSU ribosomal protein L14, putative	Mito.translation	43	128	187	152	16	35.6	57.8	65.9	52.1	35.2	5.1538	5.853	6.0422	5.7032	5.1375	0.54	1.01	0.54	0
Tb927.7.3960	Mitchondrial LSU ribosomal protein L16, putative	Mito.translation	75	131	125	133	15	62.1	59.1	44	45.6	33	5.9565	5.8851	5.4594	5.511	5.0444	1.3	1.79	1.3	0
Tb927.5.3360	Mitchondrial LSU ribosomal protein L2, putative	Mito.translation	103	191	197	212	42	85.3	86.2	69.4	72.6	92.3	6.4145	6.4296	6.1169	6.1819	6.5283	1.17	0.92	0.92	0
Tb927.11.6000	Mitchondrial LSU ribosomal protein L4	Mito.translation	83	214	317	359	30	68.8	96.6	111.7	123	66	6.1043	6.594	6.8035	6.9425	6.0444	0.56	1.04	0.56	0
Tb927.9.7170	Mitchondrial LSU ribosomal protein L47	Mito.translation	107	302	382	396	84	88.6	136.3	134.6	135.6	184.7	6.4692	7.0906	7.0725	7.0832	7.529	0.65	0.48	0.48	0
Tb927.4.4600	Mitchondrial LSU ribosomal protein L51/S25	Mito.translation	65	123	143	139	30	53.8	55.5	50.4	47.6	66	5.7495	5.7944	5.6554	5.5729	6.0444	1.07	0.82	0.82	0
Tb927.7.3430	Mitchondrial LSU ribosome-associated cyclophilin type peptidyl-prolyl cis-trans isomerase, putative (PPIase)	Mito.translation	69	109	300	283	32	57.2	49.2	105.7	96.9	70.4	5.8379	5.6206	6.7238	6.5984	6.1375	0.47	0.7	0.47	0
Tb927.11.9450	Mitchondrial LSU ribosome-associated cyclophilin type peptidyl-prolyl cis-trans isomerase, putative (PPIase)	Mito.translation	82	209	243	353	33	67.9	94.4	85.6	120.9	72.6	6.0853	6.5607	6.4195	6.9177	6.1819	0.56	0.94	0.56	0
Tb927.8.5200	Mitchondrial SSU ribosomal associated	Mito.translation	261	453	1005	918	116	216.2	204.5	354.1	314.5	255	7.7562	7.676	8.468	8.2969	7.9944	0.58	0.8	0.58	0
Tb927.7.3050	Mitchondrial SSU ribosomal associated	Mito.translation	157	331	418	338	89	130	149.4	147.3	115.8	195.7	7.0224	7.223	7.2026	6.8555	7.6125	0.88	0.66	0.66	0
Tb927.9.11120	Mitchondrial SSU ribosomal associated	Mito.translation	154	269	316	316	28	127.6	121.4	111.3	108.2	61.6	6.9955	6.9236	6.7983	6.7576	5.9449	1.09	1.97	1.09	0
Tb927.9.6510	Mitchondrial SSU ribosomal associated	Mito.translation	122	215	266	216	54	101.1	97.1	93.7	74	118.7	6.6596	6.6014	6.55	6.2095	6.8912	1.04	0.82	0.82	0
Tb927.7.3240	Mitchondrial SSU ribosomal associated	Mito.translation	141	279	255	198	14	116.8	126	89.9	67.8	30.8	6.8679	6.9773	6.4902	6.0832	4.9449	1.3	3.79	1.3	0
Tb927.5.4040	Mitchondrial SSU ribosomal associated (coiled coil)	Mito.translation	152	219	396	372	71	125.9	98.9	139.5	127.4	156.1	6.9761	6.6279	7.1241	6.9932	7.2863	0.71	0.63	0.63	0
Tb927.11.11470	Mitchondrial SSU ribosomal associated KRIPP14 (PPR)	Mito.translation	77	201	183	158	18	63.8	90.7	64.5	54.1	39.6	5.9955	6.503	6.0112	5.7576	5.3074	0.99	1.61	0.99	0
Tb927.6.2080	Mitchondrial SSU ribosomal associated KRIPP22 (PPR)	Mito.translation	111	143	193	195	15	91.9	64.6	68	66.8	33	6.522	6.0135	6.0875	6.0618	5.0444	0.95	1.96	0.95	0
Tb927.3.5240	Mitchondrial SSU ribosomal associated KRIPP8 (PPR)	Mito.translation	70	178	370	280	78	58	80.4	130.4	95.9	171.5	5.858	6.3291	7.0268	6.5835	7.4221	0.44	0.34	0.34	0
Tb927.8.5280	Mitchondrial SSU ribosomal associated TbMRPS34	Mito.translation	123	248	250	225	43	101.9	112	88.1	77.1	94.5	6.671	6.8074	6.4611	6.2687	6.5622	1.16	1.08	1.08	0
Tb927.6.4930	Mitchondrial SSU ribosomal associated, thiosulfate sulfurtransferase	Mito.translation	49	126	204	285	23	40.6	56.9	71.9	97.6	50.6	5.3434	5.8304	6.1679	6.6088	5.6611	0.42	0.8	0.42	0
Tb927.10.11260	Mitchondrial SSU ribosomal protein	Mito.translation	178	273	631	790	154	147.4	123.3	222.3	270.6	338.6	7.2036	6.946	7.7964	8.08	8.4034	0.46	0.36	0.36	0
Tb927.6.4560	Mitchondrial SSU ribosomal protein	Mito.translation	108	230	597	606	58	89.5	103.8	210.4	207.6	127.5	6.4838	6.6977	7.717	7.6977	6.9944	0.43	0.7	0.43	0
Tb927.5.1510	Mitchondrial SSU ribosomal protein	Mito.translation	118	276	584	615	69	97.7	124.6	205.8	210.7	151.7	6.6103	6.9612	7.6851	7.719	7.2451	0.46	0.64	0.46	0
Tb927.5.1790	Mitchondrial SSU ribosomal protein	Mito.translation	267	563	497	447	116	221.2	254.2	175.1	153.1	255	7.7892	7.9898	7.452	7.2583	7.9944	1.26	0.87	0.87	0
Tb927.3.2260	Mitchondrial SSU ribosomal protein	Mito.translation	133	181	455	510	65	110.2	81.7	160.3	174.7	142.9	6.784	6.3523	7.3246	7.4487	7.1589	0.47	0.57	0.47	0
Tb927.2.4400	Mitchondrial SSU ribosomal protein	Mito.translation	123	247	434	411	58	101.9	111.5	152.9	140.8	127.5	6.671	6.8009	7.2564	7.1375	6.9944	0.67	0.8	0.67	0
Tb927.9.11880	Mitchondrial SSU ribosomal protein	Mito.translation	134	279	403	491	64	111	126	142	168.2	140.7	6.7944	6.9773	7.1497	7.394	7.1365	0.66	0.79	0.66	0
Tb927.10.16090	Mitchondrial SSU ribosomal protein	Mito.translation	134	231	400	384	58	111	104.3	140.9	131.5	127.5	6.7944	6.7046	7.1385	7.0389	6.9944	0.74	0.82	0.74	0
Tb927.3.970	Mitchondrial SSU ribosomal protein	Mito.translation	89	288	376	305	139	73.7	130	132.5	104.5	305.6	6.2036	7.0224	7.0498	6.7074	8.2555	0.56	0.24	0.24	0
Tb927.10.13820	Mitchondrial SSU ribosomal protein	Mito.translation	95	231	328	293	55	78.7	104.3	115.6	100.4	120.9	6.2983	6.7046	6.853	6.6496	6.9177	0.68	0.65	0.65	0
Tb927.10.3580	Mitchondrial SSU ribosomal protein	Mito.translation	99	233	312	346	29	82	105.2	109.9	118.5	63.8	6.3576	6.717	6.78	6.8887	5.9955	0.69	1.29	0.69	0
Tb927.1.1200	Mitchondrial SSU ribosomal protein	Mito.translation	109	228	307	257	56	90.3	102.9	108.2	88	123.1	6.4967	6.6851	6.7576	6.4594	6.9437	0.83	0.73	0.73	0
Tb927.7.2620	Mitchondrial SSU ribosomal protein	Mito.translation	84	199	286	322	55	69.6	89.8	100.8	110.3	120.9	6.121	6.4886	6.6554	6.7853	6.9177	0.63	0.58	0.58	0
Tb927.11.7790	Mitchondrial SSU ribosomal protein	Mito.translation	72	209	243	221	44	59.6	94.4	85.6	75.7	96.7	5.8972	6.5607	6.4195	6.2422	6.5954	0.7	0.62	0.62	0
Tb927.8.4860	Mitchondrial SSU ribosomal protein	Mito.translation	112	200	242	193	15	92.8	90.3	85.3	66.1	33	6.5361	6.4967	6.4145	6.0466	5.0444	1.06	2.74	1.06	0
Tb927.10.2800	Mitchondrial SSU ribosomal protein	Mito.translation	67	199	235	282	29	55.5	89.8	82.8	96.6	63.8	5.7944	6.4886	6.3716	6.594	5.9955	0.57	0.87	0.57	0
Tb927.3.770	Mitchondrial SSU ribosomal protein	Mito.translation	99	201	230	234	38	82	90.7	81	80.2	83.5	6.3576	6.503	6.3399	6.3255	6.3837	1.01	0.98	0.98	0
Tb927.6.4580	Mitchondrial SSU ribosomal protein	Mito.translation	58	103	205	193	54	48	46.5	72.2	66.1	118.7	5.585	5.5392	6.1739	6.0466	6.8912	0.64	0.39	0.39	0
Tb927.9.5280	Mitchondrial SSU ribosomal protein	Mito.translation	48	108	204	231	25	39.8	48.8	71.9	79.1	55	5.3147	5.6088	6.1679	6.3056	5.7814	0.5	0.72	0.5	0
Tb927.5.3640	Mitchondrial SSU ribosomal protein	Mito.translation	68	144	194	194	42	56.3	65	68.4	66.5	92.3	5.8151	6.0224	6.0959	6.0553	6.5283	0.82	0.61	0.61	0
Tb927.9.13780	Mitchondrial SSU ribosomal protein	Mito.translation	119	211	193	196	23	98.6	95.3	68	67.1	50.6	6.6235	6.5744	6.0875	6.0682	5.6611	1.4	1.88	1.4	0
Tb927.10.3250	Mitchondrial SSU ribosomal protein	Mito.translation	55	166	173	163	34	45.6	74.9	61	55.8	74.7	5.511	6.2269	5.9307	5.8022	6.223	0.75	0.61	0.61	0
Tb927.10.11820	Mitchondrial SSU ribosomal protein	Mito.translation	93	168	165	197	24	77	75.8	58.1	67.5	52.8	6.2668	6.2441	5.8605	6.0768	5.7225	1.12	1.44	1.12	0
Tb927.8.4550	Mitchondrial SSU ribosomal protein	Mito.translation	82	230	165	195	18	67.9	103.8	58.1	66.8	39.6	6.0853	6.6977	5.8605	6.0618	5.3074	1.02	1.71	1.02	0
Tb927.8.1430	Mitchondrial SSU ribosomal protein	Mito.translation	55	83	157	135	6	45.6	37.5	55.3	46.2	13.2	5.511	5.2288	5.7892	5.5298	3.7225	0.68	2.84	0.68	0
Tb927.11.10400	Mitchondrial SSU ribosomal protein	Mito.translation	57	138	148	150	16	47.2	62.3	52.2	51.4	35.2	5.5607	5.9612	5.706	5.6837	5.1375	0.9	1.34	0.9	0
Tb927.11.11870	Mitchondrial SSU ribosomal protein	Mito.translation	130	221	137	100	17	107.7	99.8	48.3	34.3	37.4	6.7509	6.641	5.594	5.1001	5.225	2.07	2.67	2.07	0
Tb927.11.5060	Mitchondrial SSU ribosomal protein RSM22	Mito.translation	122	241	299	287	36	101.1	108.8	105.4	98.3	79.1	6.6596	6.7655	6.7197	6.6191	6.3056	0.96	1.28	0.96	0
Tb927.10.10400	Mitchondrial SSU ribosomal protein S11	Mito.translation	108	258	213	211	44	89.5	116.5	75.1	72.3	96.7	6.4838	6.8642	6.2307	6.1759	6.5954	1.19	0.93	0.93	0
Tb927.6.1250	Mitchondrial SSU ribosomal protein S29	Mito.translation	104	180	263	224	24	86.1	81.3	92.7	76.7	52.8	6.4279	6.3452	6.5345	6.2612	5.7225	0.88	1.54	0.88	0
Tb927.10.6300	Mitchondrial SSU ribosomal protein S5	Mito.translation	66	139	185	178	25	54.7	62.8	65.2	61	55	5.7735	5.9727	6.0268	5.9307	5.7814	0.84	0.99	0.84	0
Tb927.8.3110	Mitchondrial SSU ribosomal protein S9/S16	Mito.translation	97	249	277	255	17	80.3	112.4	97.6	87.3	37.4	6.3273	6.8125	6.6088	6.4479	5.225	0.82	2.15	0.82	0
Tb927.11.10150	Mitchondrial SSU ribosomal protein, Enoyl-CoA hydratase/isomerase family, putative	Mito.translation	201	357	837	783	105	166.5	161.2	294.9	268.2	230.8	7.3794	7.3327	8.2041	8.0672	7.8505	0.55	0.7	0.55	0
Tb927.4.3690	Mitchondrial SSU ribosomal protein, Iron/manganese superoxide dismutases, C-terminal domain containing protein, putative	Mito.translation	80	190	328	303	63	66.3	85.8	115.6	103.8	138.5	6.0509	6.4229	6.853	6.6977	7.1137	0.57	0.48	0.48	0
Tb927.9.11280	Mitchondrial SSU ribosomal S17, putative	Mito.translation	122	275	493	537	43	101.1	124.2	173.7	183.9	94.5	6.6596	6.9565	7.4405	7.5228	6.5622	0.55	1.07	0.55	0
Tb927.10.13300	Mitchondrial SSU ribosomal S8, putative	Mito.translation	69	143	353	380	64	57.2	64.6	124.4	130.2	140.7	5.8379	6.0135	6.9588	7.0246	7.1365	0.44	0.41	0.41	0
Tb927.2.4740	Mitochondrial LSU ribosomal protein L11	Mito.translation	114	336	414	342	61	94.4	151.7	145.9	117.2	134.1	6.5607	7.2451	7.1888	6.8728	7.0672	0.65	0.7	0.65	0
Tb927.1.2990	PPR2	Mito.translation	184	352	623	612	49	152.4	158.9	219.5	209.6	107.7	7.2517	7.312	7.7781	7.7115	6.7509	0.69	1.42	0.69	0
Tb927.1.1160	PPR3	Mito.translation	85	197	154	140	22	70.4	88.9	54.3	48	48.4	6.1375	6.4741	5.7629	5.585	5.5969	1.3	1.45	1.3	0
Tb927.10.13200	PPR4	Mito.translation	94	203	362	352	59	77.9	91.6	127.6	120.6	129.7	6.2836	6.5173	6.9955	6.9141	7.019	0.61	0.6	0.6	0
Tb927.10.380	PPR5 mitochondrial RNA binding protein 1	Mito.translation	128	200	245	235	34	106	90.3	86.3	80.5	74.7	6.7279	6.4967	6.4313	6.3309	6.223	1.05	1.21	1.05	0
Tb927.3.1070	RF1 Mitochondrial peptide chain release factor 1	Mito.translation	102	176	246	297	19	84.5	79.5	86.7	101.7	41.8	6.4009	6.3129	6.438	6.6682	5.3854	0.78	1.9	0.78	0
Tb927.3.5610	ribosomal protein L3 mitochondrial, putative	Mito.translation	93	243	267	271	30	77	109.7	94.1	92.8	66	6.2668	6.7774	6.5561	6.5361	6.0444	0.82	1.17	0.82	0
Tb927.9.12850	SpoU rRNA Methylase family, putative	Mito.translation	98	210	230	240	25	81.2	94.8	81	82.2	55	6.3434	6.5668	6.3399	6.3611	5.7814	0.99	1.48	0.99	0
Tb927.10.15650	tRNA pseudouridine synthase A-like protein	Mito.translation	92	144	295	214	41	76.2	65	104	73.3	90.1	6.2517	6.0224	6.7004	6.1957	6.4935	0.63	0.72	0.63	0
Tb927.9.12120	mitochondrial carrier protein, MCP1	Mito.transport	111	192	181	204	30	91.9	86.7	63.8	69.9	66	6.522	6.438	5.9955	6.1272	6.0444	1.24	1.31	1.24	0
Tb927.11.270	mitochondrial carrier protein, MCP10	Mito.transport	76	101	172	210	30	63	45.6	60.6	71.9	66	5.9773	5.511	5.9212	6.1679	6.0444	0.63	0.69	0.63	0
Tb927.9.10310	mitochondrial carrier protein, MCP11	Mito.transport	219	407	611	648	137	181.4	183.7	215.3	222	301.2	7.503	7.5212	7.7502	7.7944	8.2346	0.82	0.6	0.6	0
Tb927.10.12840	mitochondrial carrier protein, MCP12	Mito.transport	114	240	319	274	30	94.4	108.4	112.4	93.9	66	6.5607	6.7602	6.8125	6.5531	6.0444	0.84	1.43	0.84	0
Tb927.2.2970	mitochondrial carrier protein, MCP13	Mito.transport	43	81	144	161	9	35.6	36.6	50.7	55.1	19.8	5.1538	5.1938	5.6639	5.784	4.3074	0.65	1.8	0.65	0
Tb927.10.13120	mitochondrial carrier protein, MCP14	Mito.transport	60	85	122	109	11	49.7	38.4	43	37.3	24.2	5.6352	5.263	5.4263	5.2211	4.5969	0.89	1.59	0.89	0
Tb927.8.1310	mitochondrial carrier protein, MCP15	Mito.transport	69	154	135	145	14	57.2	69.5	47.6	49.7	30.8	5.8379	6.1189	5.5729	5.6352	4.9449	1.15	1.86	1.15	0
Tb927.7.3940	mitochondrial carrier protein, MCP16	Mito.transport	162	384	425	407	50	134.2	173.4	149.8	139.4	109.9	7.0682	7.438	7.2269	7.1231	6.78	0.9	1.22	0.9	0
Tb927.3.2980	mitochondrial carrier protein, MCP17	Mito.transport	68	181	142	161	69	56.3	81.7	50	55.1	151.7	5.8151	6.3523	5.6439	5.784	7.2451	1.02	0.37	0.37	0
Tb927.8.3330	mitochondrial carrier protein, MCP18	Mito.transport	65	151	120	148	3	53.8	68.2	42.3	50.7	6.6	5.7495	6.0917	5.4026	5.6639	2.7225	1.06	8.15	1.06	0
Tb927.8.4440	mitochondrial carrier protein, MCP19	Mito.transport	76	161	257	224	69	63	72.7	90.6	76.7	151.7	5.9773	6.1839	6.5014	6.2612	7.2451	0.7	0.42	0.42	0
Tb927.10.14280	mitochondrial carrier protein, MCP20	Mito.transport	34	77	97	65	20	28.2	34.8	34.2	22.3	44	4.8176	5.121	5.0959	4.479	5.4594	0.82	0.64	0.64	0
Tb927.11.13440	mitochondrial carrier protein, MCP21	Mito.transport	44	146	172	133	19	36.4	65.9	60.6	45.6	41.8	5.1859	6.0422	5.9212	5.511	5.3854	0.6	0.87	0.6	0
Tb927.5.1550	mitochondrial carrier protein, MCP23	Mito.transport	65	111	137	135	16	53.8	50.1	48.3	46.2	35.2	5.7495	5.6467	5.594	5.5298	5.1375	1.04	1.42	1.04	0
Tb927.8.5810	mitochondrial carrier protein, MCP24	Mito.transport	82	141	161	145	28	67.9	63.7	56.7	49.7	61.6	6.0853	5.9932	5.8253	5.6352	5.9449	1.12	1.03	1.03	0
Tb927.9.11040	mitochondrial carrier protein, MCP3	Mito.transport	68	111	74	91	14	56.3	50.1	26.1	31.2	30.8	5.8151	5.6467	4.706	4.9635	4.9449	1.61	1.63	1.61	0
Tb927.10.4910	mitochondrial carrier protein, MCP4	Mito.transport	95	221	316	229	37	78.7	99.8	111.3	78.4	81.3	6.2983	6.641	6.7983	6.2928	6.3452	0.71	0.97	0.71	0
Tb927.10.14840	mitochondrial carrier protein, MCP5c	Mito.transport	497	1074	1245	1528	200	411.7	484.9	438.7	523.4	439.7	8.6854	8.9215	8.7771	9.0318	8.7804	0.79	0.94	0.79	0
Tb927.4.1660	mitochondrial carrier protein, MCP6	Mito.transport	75	117	267	258	25	62.1	52.8	94.1	88.4	55	5.9565	5.7225	6.5561	6.466	5.7814	0.56	0.96	0.56	0
Tb927.10.15710	mitochondrial carrier protein, MCP7	Mito.transport	83	154	194	191	34	68.8	69.5	68.4	65.4	74.7	6.1043	6.1189	6.0959	6.0312	6.223	1.01	0.92	0.92	0
Tb927.10.10440	mitochondrial carrier protein, MCP8	Mito.transport	63	144	122	121	52	52.2	65	43	41.4	114.3	5.706	6.0224	5.4263	5.3716	6.8367	1.21	0.46	0.46	0
Tb927.11.5290	mitochondrial carrier protein, MCP9	Mito.transport	74	167	186	187	25	61.3	75.4	65.5	64.1	55	5.9378	6.2365	6.0334	6.0023	5.7814	0.94	1.11	0.94	0
Tb927.7.1620	CFI25m	mRNA.processing	50	125	168	144	19	41.4	56.4	59.2	49.3	41.8	5.3716	5.8176	5.8875	5.6235	5.3854	0.7	0.99	0.7	0
Tb927.6.3690	CFII	mRNA.processing	82	177	268	298	16	67.9	79.9	94.4	102.1	35.2	6.0853	6.3201	6.5607	6.6738	5.1375	0.67	1.93	0.67	0
Tb927.11.14340	exportin 1 (XPO1)	Nuclear.transport	190	289	568	732	123	157.4	130.5	200.1	250.7	270.4	7.2983	7.0279	7.6446	7.9698	8.079	0.52	0.48	0.48	0
Tb927.11.15370	hypothetical protein, conserved (TbKap123)	Nuclear.transport	316	315	719	686	55	261.8	142.2	253.4	235	120.9	8.0323	7.1518	7.9853	7.8765	6.9177	0.56	1.18	0.56	0
Tb927.10.7630	hypothetical protein, conserved,transportin2- like protein	Nuclear.transport	176	311	454	538	99	145.8	140.4	160	184.3	217.7	7.1878	7.1334	7.3219	7.5259	7.7662	0.76	0.64	0.64	0
Tb927.9.13520	Importin 1 (IMP1)	Nuclear.transport	130	253	346	333	73	107.7	114.2	121.9	114.1	160.5	6.7509	6.8354	6.9296	6.8342	7.3264	0.88	0.67	0.67	0
Tb927.6.2640	importin alpha subunit, putative (TbKap60)	Nuclear.transport	166	306	451	501	60	137.5	138.1	158.9	171.6	131.9	7.1033	7.1096	7.312	7.4229	7.0433	0.8	1.04	0.8	0
Tb927.10.2900	importin beta-1 subunit, putative	Nuclear.transport	294	363	555	692	87	243.5	163.9	195.6	237	191.3	7.9278	7.3567	7.6118	7.8887	7.5797	0.69	0.86	0.69	0
Tb927.6.4740	importin-alpha re-exporter protein, putative	Nuclear.transport	202	314	434	454	75	167.3	141.8	152.9	155.5	164.9	7.3863	7.1477	7.2564	7.2808	7.3654	0.91	0.86	0.86	0
Tb927.10.2370	LA	Nuclear.transport	194	296	727	754	162	160.7	133.6	256.2	258.3	356.2	7.3282	7.0618	8.0011	8.0129	8.4765	0.52	0.38	0.38	0
Tb927.6.4950	mago nashi-like protein, putative	Nuclear.transport	160	227	460	497	188	132.5	102.5	162.1	170.2	413.3	7.0498	6.6795	7.3407	7.4111	8.691	0.6	0.25	0.25	0
Tb927.11.2370	MEX67	Nuclear.transport	260	278	344	397	23	215.4	125.5	121.2	136	50.6	7.7509	6.9715	6.9212	7.0875	5.6611	0.92	2.48	0.92	0
Tb927.7.5760	MTR2	Nuclear.transport	70	71	155	253	17	58	32.1	54.6	86.7	37.4	5.858	5.0045	5.7708	6.438	5.225	0.37	0.86	0.37	0
Tb927.11.3550	NPA3/XAB1 homologue, interacts with XPA and with RNA pol II, required for pol II import into the nucleus.	Nuclear.transport	139	224	181	194	18	115.1	101.1	63.8	66.5	39.6	6.8467	6.6596	5.9955	6.0553	5.3074	1.52	2.55	1.52	0
Tb927.10.2240	NTF2-like domain, in Y14 TAP	Nuclear.transport	486	864	1437	1329	162	402.6	390.1	506.4	455.2	356.2	8.6532	8.6077	8.9841	8.8304	8.4765	0.77	1.1	0.77	0
Tb927.10.15210	nuclear cap binding complex subunit CBP30	Nuclear.transport	55	127	308	317	32	45.6	57.3	108.5	108.6	70.4	5.511	5.8405	6.7616	6.7629	6.1375	0.42	0.65	0.42	0
Tb927.6.1970	nuclear cap binding protein CBC20	Nuclear.transport	79	167	242	226	18	65.4	75.4	85.3	77.4	39.6	6.0312	6.2365	6.4145	6.2743	5.3074	0.77	1.65	0.77	0
Tb927.8.4280	nuclear transport factor 2, putative	Nuclear.transport	219	339	227	373	68	181.4	153	80	127.8	149.5	7.503	7.2574	6.3219	6.9977	7.224	1.2	1.02	1.02	0
Tb927.11.2670	Nucleoporin (TbNup59)	Nuclear.transport	117	207	506	500	76	96.9	93.5	178.3	171.3	167.1	6.5984	6.5469	7.4782	7.4204	7.3846	0.52	0.56	0.52	0
Tb927.9.3760	poly(A) export protein, putative (TbGLE2)	Nuclear.transport	124	249	341	362	61	102.7	112.4	120.2	124	134.1	6.6823	6.8125	6.9093	6.9542	7.0672	0.83	0.77	0.77	0
Tb927.8.3370	Ran guanine nucleotide release factor homologue	Nuclear.transport	35	59	174	186	52	29	26.6	61.3	63.7	114.3	4.858	4.7334	5.9378	5.9932	6.8367	0.42	0.23	0.23	0
Tb927.3.1120	Ran or RTB2	Nuclear.transport	465	709	974	997	124	385.2	320.1	343.2	341.5	272.6	8.5895	8.3224	8.4229	8.4157	8.0906	0.93	1.17	0.93	0
Tb927.11.3380	RanBP1 Ran-binding protein 1	Nuclear.transport	214	449	284	309	38	177.3	202.7	100.1	105.8	83.5	7.47	7.6632	6.6453	6.7252	6.3837	1.68	2.12	1.68	0
Tb927.10.8650	RanBPL, interacts with Ran (Tb927.3.1120)	Nuclear.transport	154	399	314	343	121	127.6	180.1	110.6	117.5	266	6.9955	7.4927	6.7892	6.8765	8.0553	1.09	0.48	0.48	0
Tb927.11.9800	serine peptidase, Clan SP, family S59, putative Nucleoporin	Nuclear.transport	125	210	295	294	54	103.5	94.8	104	100.7	118.7	6.6935	6.5668	6.7004	6.6539	6.8912	0.91	0.8	0.8	0
Tb927.10.7680	TBC-RootA likely Ran-GAP	Nuclear.transport	296	360	773	798	118	245.2	162.5	272.4	273.4	259.4	7.9378	7.3443	8.0896	8.0949	8.019	0.59	0.63	0.59	0
Tb927.11.15990	TbNup109 Outer ring	Nuclear.transport	196	384	398	339	51	162.4	173.4	140.2	116.1	112.1	7.3434	7.438	7.1313	6.8592	6.8086	1.16	1.45	1.16	0
Tb927.11.330	TbNup110 Basket	Nuclear.transport	163	361	734	805	74	135	163	258.6	275.7	162.7	7.0768	7.3487	8.0146	8.107	7.3461	0.49	0.83	0.49	0
Tb927.11.9780	TbNup119 Outer-inner connect	Nuclear.transport	156	381	648	724	159	129.2	172	228.3	248	349.6	7.0135	7.4263	7.8348	7.9542	8.4496	0.52	0.37	0.37	0
Tb927.7.2300	TbNup132 Outer ring	Nuclear.transport	280	467	602	542	85	231.9	210.8	212.1	185.7	186.9	7.8574	7.7197	7.7286	7.5368	7.5461	0.99	1.13	0.99	0
Tb927.10.8170	TbNup144 Outer-inner connect	Nuclear.transport	235	413	579	597	74	194.7	186.5	204	204.5	162.7	7.6051	7.543	7.6724	7.676	7.3461	0.91	1.15	0.91	0
Tb927.10.9650	TbNup152 Outer ring	Nuclear.transport	265	456	703	748	116	219.5	205.9	247.7	256.2	255	7.7781	7.6858	7.9525	8.0011	7.9944	0.8	0.81	0.8	0
Tb927.10.8910	TbNup181 Inner ring	Nuclear.transport	205	365	569	532	85	169.8	164.8	200.5	182.2	186.9	7.4077	7.3646	7.6475	7.5094	7.5461	0.82	0.88	0.82	0
Tb927.4.2880	TbNup225 Inner ring	Nuclear.transport	428	561	1050	987	183	354.5	253.3	370	338.1	402.3	8.4696	7.9847	8.5314	8.4013	8.6521	0.68	0.63	0.63	0
Tb927.10.2320	TbNup41 Outer ring	Nuclear.transport	57	155	172	204	40	47.2	70	60.6	69.9	87.9	5.5607	6.1293	5.9212	6.1272	6.4578	0.68	0.54	0.54	0
Tb927.11.4540	TbNup48 Connect to basket	Nuclear.transport	81	198	157	127	16	67.1	89.4	55.3	43.5	35.2	6.0682	6.4822	5.7892	5.4429	5.1375	1.21	1.91	1.21	0
Tb927.11.15560	TbNup53a Inner ring FG Nup facing both sides	Nuclear.transport	90	243	308	261	67	74.5	109.7	108.5	89.4	147.3	6.2192	6.7774	6.7616	6.4822	7.2026	0.69	0.51	0.51	0
Tb927.3.3540	TbNup53b Inner ring, FG Nup facing both sides	Nuclear.transport	125	291	300	304	28	103.5	131.4	105.7	104.1	61.6	6.6935	7.0378	6.7238	6.7018	5.9449	0.98	1.68	0.98	0
Tb927.4.4310	TbNup64 Connect inner-outer, FG, symmetrical, paralogue pf Nup75	Nuclear.transport	161	245	359	385	41	133.4	110.6	126.5	131.9	90.1	7.0596	6.7892	6.983	7.0433	6.4935	0.84	1.23	0.84	0
Tb927.10.3810	TbNup65 Inner ring, RRM & TM domain	Nuclear.transport	99	167	424	405	61	82	75.4	149.4	138.7	134.1	6.3576	6.2365	7.223	7.1158	7.0672	0.5	0.56	0.5	0
Tb927.8.8050	TbNup75 Connect inner-outer, FG, symmetrical, paralogue pf Nup64	Nuclear.transport	83	234	355	316	37	68.8	105.6	125.1	108.2	81.3	6.1043	6.7225	6.9669	6.7576	6.3452	0.55	0.85	0.55	0
Tb927.8.6250	TbNup76 Complex+149, 140, symmetric, interact MEX67	Nuclear.transport	121	283	555	641	86	100.2	127.8	195.6	219.6	189.1	6.6467	6.9977	7.6118	7.7787	7.563	0.46	0.53	0.46	0
Tb927.9.14240	TbNup82 Outer ring	Nuclear.transport	143	331	281	260	24	118.5	149.4	99	89.1	52.8	6.8887	7.223	6.6294	6.4774	5.7225	1.2	2.24	1.2	0
Tb927.11.2950	TbNup89 Outer ring	Nuclear.transport	123	270	270	213	35	101.9	121.9	95.1	73	76.9	6.671	6.9296	6.5714	6.1898	6.2649	1.07	1.33	1.07	0
Tb927.9.1340	TbNup92 Basket	Nuclear.transport	322	486	1055	1180	111	266.7	219.4	371.8	404.2	244	8.0591	7.7774	8.5384	8.6589	7.9307	0.54	0.9	0.54	0
Tb927.10.7060	TbNup96 Inner ring	Nuclear.transport	151	296	459	450	38	125.1	133.6	161.7	154.1	83.5	6.9669	7.0618	7.3372	7.2677	6.3837	0.77	1.5	0.77	0
Tb927.10.14180	TbSec13 Outer ring nucleoporin	Nuclear.transport	202	467	643	659	193	167.3	210.8	226.6	225.7	424.3	7.3863	7.7197	7.824	7.8183	8.7289	0.74	0.39	0.39	0
Tb927.2.2240	tRNA exportin, putative,exportin-T, putative (25N14.145)	Nuclear.transport	139	224	358	348	96	115.1	101.1	126.1	119.2	211.1	6.8467	6.6596	6.9784	6.8972	7.7218	0.8	0.48	0.48	0
Tb927.7.1170	Y14	Nuclear.transport	135	275	239	187	43	111.8	124.2	84.2	64.1	94.5	6.8048	6.9565	6.3957	6.0023	6.5622	1.33	1.18	1.18	0
Tb927.7.1780	Adenine phosphoribosyltransferase, putative	Nucleotides	146	275	269	344	65	120.9	124.2	94.8	117.8	142.9	6.9177	6.9565	6.5668	6.8802	7.1589	1.03	0.85	0.85	0
Tb927.7.1790	Adenine phosphoribosyltransferase, putative	Nucleotides	23	50	34	41	5	19.1	22.6	12	14	11	4.2555	4.4983	3.585	3.8074	3.4594	1.36	1.74	1.36	0
Tb927.7.4480	adenosine 5'-monophosphoramidase, putative	Nucleotides	286	634	604	521	215	236.9	286.2	212.8	178.5	472.7	7.8881	8.1609	7.7334	7.4798	8.8848	1.11	0.5	0.5	0
Tb927.10.10810	adenosine deaminase-like protein	Nucleotides	103	185	232	224	33	85.3	83.5	81.8	76.7	72.6	6.4145	6.3837	6.354	6.2612	6.1819	1.02	1.15	1.02	0
Tb927.6.2300	adenosine kinase, putative	Nucleotides	434	979	1115	1123	145	359.5	442	392.9	384.7	318.8	8.4898	8.7879	8.618	8.5876	8.3165	0.91	1.13	0.91	0
Tb927.9.7180	adenosine monophosphate deaminase, putative,AMP deaminase, putative	Nucleotides	374	518	736	783	110	309.8	233.9	259.3	268.2	241.8	8.2752	7.8697	8.0185	8.0672	7.9177	0.87	0.97	0.87	0
Tb927.3.590	adenosine transporter, putative	Nucleotides	29	84	54	37	11	24	37.9	19	12.7	24.2	4.585	5.2441	4.2479	3.6668	4.5969	1.26	0.99	0.99	0
Tb927.6.3210	adenylate kinase in T. cruzi, nuclear	Nucleotides	45	112	89	114	11	37.3	50.6	31.4	39.1	24.2	5.2211	5.6611	4.9727	5.2891	4.5969	0.95	1.54	0.95	0
Tb927.10.5760	adenylate kinase, glycosomal (ADKD)	Nucleotides	85	144	346	317	80	70.4	65	121.9	108.6	175.9	6.1375	6.0224	6.9296	6.7629	7.4586	0.53	0.37	0.37	0
Tb927.2.5660	adenylate kinase, putative (ADKA)	Nucleotides	110	221	96	114	30	91.1	99.8	33.8	39.1	66	6.5094	6.641	5.079	5.2891	6.0444	2.33	1.38	1.38	0
Tb927.10.830	adenylate kinase, putative (ADKB)	Nucleotides	72	165	350	343	54	59.6	74.5	123.3	117.5	118.7	5.8972	6.2192	6.946	6.8765	6.8912	0.48	0.5	0.48	0
Tb927.10.2540	adenylate kinase, putative (ADKC)	Nucleotides	85	221	199	208	15	70.4	99.8	70.1	71.2	33	6.1375	6.641	6.1313	6.1538	5.0444	0.99	2.13	0.99	0
Tb927.5.3970	adenylate kinase, putative (ADKE)	Nucleotides	134	211	238	258	34	111	95.3	83.9	88.4	74.7	6.7944	6.5744	6.3906	6.466	6.223	1.08	1.28	1.08	0
Tb927.10.2530	adenylate kinase, putative (ADKF)	Nucleotides	107	149	255	286	39	88.6	67.3	89.9	98	85.7	6.4692	6.0725	6.4902	6.6147	6.4212	0.69	0.79	0.69	0
Tb927.9.8450	adenylate, cytidylate and uridylate kinase (ADKG)	Nucleotides	191	320	267	285	122	158.2	144.5	94.1	97.6	268.2	7.3056	7.1749	6.5561	6.6088	8.0672	1.48	0.54	0.54	0
Tb927.9.7550	adenylosuccinate lyase, putative	Nucleotides	112	203	160	150	28	92.8	91.6	56.4	51.4	61.6	6.5361	6.5173	5.8176	5.6837	5.9449	1.62	1.49	1.49	0
Tb927.11.3650	adenylosuccinate synthetase, putative	Nucleotides	764	1009	781	716	81	632.8	455.5	275.2	245.3	178.1	9.3056	8.8313	8.1043	7.9384	7.4765	1.66	2.56	1.66	0
Tb927.11.3850	AMP deaminase, putative	Nucleotides	318	429	942	863	167	263.4	193.7	331.9	295.6	367.1	8.0411	7.5977	8.3746	8.2075	8.52	0.58	0.53	0.53	0
Tb927.9.9740	AMP deaminase, putative	Nucleotides	248	497	713	722	118	205.4	224.4	251.2	247.3	259.4	7.6823	7.8099	7.9727	7.9501	8.019	0.82	0.79	0.79	0
Tb927.11.15750	AMP deaminase, putative	Nucleotides	221	350	493	524	109	183.1	158	173.7	179.5	239.6	7.5165	7.3038	7.4405	7.4878	7.9045	0.88	0.66	0.66	0
Tb927.5.3820	aspartate carbamoyltransferase, putative	Nucleotides	124	221	300	279	36	102.7	99.8	105.7	95.6	79.1	6.6823	6.641	6.7238	6.5789	6.3056	0.94	1.26	0.94	0
Tb927.8.2980	Bis(5'-adenosyl)-triphosphatase, putative	Nucleotides	65	164	234	188	19	53.8	74	82.5	64.4	41.8	5.7495	6.2095	6.3663	6.009	5.3854	0.65	1.29	0.65	0
Tb927.1.1240	CTP synthase	Nucleotides	160	284	657	598	127	132.5	128.2	231.5	204.8	279.2	7.0498	7.0023	7.8549	7.6781	8.1252	0.55	0.46	0.46	0
Tb927.9.3000	cytidine deaminase, putative	Nucleotides	39	59	105	89	5	32.3	26.6	37	30.5	11	5.0135	4.7334	5.2095	4.9307	3.4594	0.72	2.42	0.72	0
Tb927.7.5160	deoxyuridine triphosphatase, putative,dUTP diphosphatase	Nucleotides	112	191	326	309	42	92.8	86.2	114.9	105.8	92.3	6.5361	6.4296	6.8442	6.7252	6.5283	0.75	0.93	0.75	0
Tb927.7.2100	GMP synthase	Nucleotides	139	210	352	420	55	115.1	94.8	124	143.9	120.9	6.8467	6.5668	6.9542	7.1689	6.9177	0.66	0.78	0.66	0
Tb927.5.4560	guanine deaminase, putative	Nucleotides	129	244	266	257	38	106.9	110.2	93.7	88	83.5	6.7401	6.784	6.55	6.4594	6.3837	1.14	1.28	1.14	0
Tb927.5.2080	guanosine monophosphate reductase, putative	Nucleotides	110	282	353	291	49	91.1	127.3	124.4	99.7	107.7	6.5094	6.9921	6.9588	6.6395	6.7509	0.73	0.85	0.73	0
Tb927.10.11700	guanylate kinase, putative	Nucleotides	87	125	553	618	73	72.1	56.4	194.9	211.7	160.5	6.1719	5.8176	7.6066	7.7259	7.3264	0.27	0.35	0.27	0
Tb927.10.6810	guanylate kinase, putative	Nucleotides	86	151	325	470	42	71.2	68.2	114.5	161	92.3	6.1538	6.0917	6.8392	7.3309	6.5283	0.42	0.74	0.42	0
Tb927.10.1470	hypoxanthine-guanine phosphoribosyltransferase (HGPRT)	Nucleotides	192	487	554	556	52	159	219.9	195.2	190.5	114.3	7.3129	7.7807	7.6088	7.5736	6.8367	0.81	1.39	0.81	0
Tb927.10.1390	hypoxanthine-guanine phosphoribosyltransferase, putative	Nucleotides	171	248	498	474	67	141.6	112	175.5	162.4	147.3	7.1457	6.8074	7.4553	7.3434	7.2026	0.64	0.76	0.64	0
Tb927.10.16120	inosine-5'-monophosphate dehydrogenase,IMP dehydrogenase	Nucleotides	334	670	866	841	120	276.7	302.5	305.2	288.1	263.8	8.1122	8.2408	8.2536	8.1704	8.0433	0.91	1.05	0.91	0
Tb927.3.2960	inosine-adenosine-guanosine-nucleosidehydrolase (IAGNH)	Nucleotides	532	984	1045	1178	417	440.7	444.2	368.2	403.5	916.8	8.7837	8.7951	8.5243	8.6564	9.8405	1.09	0.48	0.48	0
Tb927.7.4570	inosine-guanine nucleoside hydrolase (IG-NH)	Nucleotides	179	236	697	731	66	148.3	106.5	245.6	250.4	145.1	7.2124	6.7347	7.9402	7.9681	7.1809	0.43	0.73	0.43	0
Tb927.5.1360	nucleoside 2-deoxyribosyltransferase (NDRT)	Nucleotides	66	131	171	149	77	54.7	59.1	60.3	51	169.3	5.7735	5.8851	5.9141	5.6724	7.4034	0.91	0.32	0.32	0
Tb927.11.16130	nucleoside diphosphate kinase (NDPK)	Nucleotides	844	1039	1797	1824	99	699.1	469.1	633.2	624.8	217.7	9.4494	8.8738	9.3065	9.2873	7.7662	0.74	2.15	0.74	0
Tb927.4.1720	nucleoside diphosphate kinase, putative	Nucleotides	114	239	242	248	20	94.4	107.9	85.3	85	44	6.5607	6.7536	6.4145	6.4094	5.4594	1.11	2.15	1.11	0
Tb927.9.11260	nucleoside diphosphate kinase, putative	Nucleotides	73	183	209	248	19	60.5	82.6	73.6	85	41.8	5.9189	6.3681	6.2016	6.4094	5.3854	0.71	1.45	0.71	0
Tb927.8.3800	nucleoside phosphatase, putative,guanosine diphosphatase, putative	Nucleotides	112	253	269	228	29	92.8	114.2	94.8	78.1	63.8	6.5361	6.8354	6.5668	6.2873	5.9955	0.98	1.45	0.98	0
Tb927.9.15980	nucleoside transporter 1, putative	Nucleotides	19	44	34	35	6	15.7	19.9	12	12	13.2	3.9727	4.3147	3.585	3.585	3.7225	1.31	1.19	1.19	0
Tb927.5.3810	orotidine-5-phosphate decarboxylase/orotate phosphoribosyltransferase, OMPDCase-OPRTase	Nucleotides	130	234	242	256	24	107.7	105.6	85.3	87.7	52.8	6.7509	6.7225	6.4145	6.4545	5.7225	1.2	2	1.2	0
Tb927.9.7470	purine nucleoside transporter NT10	Nucleotides	60	145	308	332	36	49.7	65.5	108.5	113.7	79.1	5.6352	6.0334	6.7616	6.8291	6.3056	0.44	0.63	0.44	0
Tb927.6.220	purine nucleoside transporter NT9	Nucleotides	63	109	106	77	19	52.2	49.2	37.4	26.4	41.8	5.706	5.6206	5.225	4.7225	5.3854	1.32	1.18	1.18	0
Tb927.11.7840	ribonucleoside-diphosphate reductase large chain (RNR1)	Nucleotides	207	456	1048	1166	144	171.5	205.9	369.3	399.4	316.6	7.4221	7.6858	8.5286	8.6417	8.3065	0.43	0.54	0.43	0
Tb927.8.3510	thymidylate kinase, putative	Nucleotides	153	241	221	257	61	126.7	108.8	77.9	88	134.1	6.9853	6.7655	6.2836	6.4594	7.0672	1.24	0.81	0.81	0
Tb927.4.3320	uracil phosphoribosyltransferase, putative	Nucleotides	253	456	456	543	129	209.6	205.9	160.7	186	283.6	7.7115	7.6858	7.3282	7.5392	8.1477	1.11	0.73	0.73	0
Tb927.8.4430	uridine phosphorylase	Nucleotides	713	1248	1723	1785	459	590.6	563.4	607.1	611.4	1009.1	9.206	9.138	9.2458	9.256	9.9789	0.92	0.56	0.56	0
Tb927.1.1890	Replication Factor C Subunit 1-related protein	Nucleus	183	298	442	470	59	151.6	134.5	155.7	161	129.7	7.2441	7.0715	7.2826	7.3309	7.019	0.84	1.04	0.84	0
Tb927.10.180	ATP synthase F1 subunit gamma protein, putative (ATPF1G)	Ox.phosphorylation	143	286	399	433	57	118.5	129.1	140.6	148.3	125.3	6.8887	7.0123	7.1355	7.2124	6.9692	0.8	0.95	0.8	0
Tb927.7.7420	ATP synthase F1, alpha subunit (ATPF1A)	Ox.phosphorylation	216	523	566	570	51	178.9	236.1	199.4	195.3	112.1	7.483	7.8833	7.6395	7.6095	6.8086	0.9	1.6	0.9	0
Tb927.3.1380	ATP synthase subunit beta, mitochondrial (ATPB)	Ox.phosphorylation	140	341	410	370	30	116	154	144.5	126.7	66	6.858	7.2668	7.1749	6.9853	6.0444	0.8	1.76	0.8	0
Tb927.1.3820	ATP synthase subunit, putative	Ox.phosphorylation	152	310	323	374	88	125.9	140	113.8	128.1	193.5	6.9761	7.1293	6.8304	7.0011	7.5962	0.98	0.65	0.65	0
Tb927.6.4990	ATP synthase, epsilon chain, putative	Ox.phosphorylation	112	278	288	289	24	92.8	125.5	101.5	99	52.8	6.5361	6.9715	6.6653	6.6294	5.7225	0.91	1.76	0.91	0
Tb927.10.730	ATP synthase, putative	Ox.phosphorylation	119	283	372	372	163	98.6	127.8	131.1	127.4	358.4	6.6235	6.9977	7.0345	6.9932	8.4854	0.75	0.28	0.28	0
Tb927.11.9420	ATP synthase, putative	Ox.phosphorylation	137	358	328	375	71	113.5	161.6	115.6	128.5	156.1	6.8265	7.3363	6.853	7.0056	7.2863	0.88	0.73	0.73	0
Tb927.10.5680	procyclin-associated gene 1 (PAG1) protein, putative	PAG	269	527	1132	1477	132	222.8	237.9	398.9	505.9	290.2	7.7996	7.8942	8.6399	8.9827	8.1809	0.44	0.77	0.44	0
Tb927.10.10220	procyclin-associated gene 2 (PAG2) protein (PAG2)	PAG	67	48	113	142	12	55.5	21.7	39.8	48.6	26.4	5.7944	4.4396	5.3147	5.6029	4.7225	0.45	0.82	0.45	0
Tb927.10.5690	procyclin-associated gene 2 (PAG2) protein, putative	PAG	160	565	922	1067	196	132.5	255.1	324.9	365.5	430.9	7.0498	7.9949	8.3439	8.5137	8.7512	0.36	0.31	0.31	0
Tb927.11.14600	procyclin-associated gene 2-like protein, putative	PAG	200	562	863	1006	68	165.7	253.7	304.1	344.6	149.5	7.3724	7.987	8.2484	8.4288	7.224	0.48	1.11	0.48	0
Tb927.10.10210	procyclin-associated gene 4 (PAG4) protein (PAG4)	PAG	59	46	50	66	10	48.9	20.8	17.6	22.6	22	5.6118	4.3785	4.1375	4.4983	4.4594	0.92	0.95	0.92	0
Tb927.11.14610	procyclin-associated gene 4 (PAG4) protein, putative	PAG	116	338	739	923	100	96.1	152.6	260.4	316.2	219.9	6.5865	7.2536	8.0246	8.3047	7.7807	0.3	0.44	0.3	0
Tb927.10.7020	Acid phosphatase (TbAP)	Phosphatase	117	165	270	270	46	96.9	74.5	95.1	92.5	101.1	6.5984	6.2192	6.5714	6.5314	6.6596	0.78	0.74	0.74	0
Tb927.5.630	acidic phosphatase, putative	Phosphatase	495	1583	3921	4983	790	410	714.7	1381.7	1706.9	1736.8	8.6795	9.4812	10.4322	10.7372	10.7622	0.24	0.24	0.24	0
Tb927.5.610	acidic phosphatase, putative	Phosphatase	395	1004	1530	1724	302	327.2	453.3	539.1	590.5	663.9	8.354	8.8243	9.0744	9.2058	9.3748	0.55	0.49	0.49	0
Tb927.9.8250	atypical dual specificity phosphatase, putative	Phosphatase	88	193	257	262	18	72.9	87.1	90.6	89.7	39.6	6.1878	6.4446	6.5014	6.487	5.3074	0.8	1.84	0.8	0
Tb927.11.14260	atypical dual specificity phosphatase, putative	Phosphatase	72	131	135	121	17	59.6	59.1	47.6	41.4	37.4	5.8972	5.8851	5.5729	5.3716	5.225	1.24	1.58	1.24	0
Tb927.11.7320	dual specificity phopshatase, putative	Phosphatase	79	161	270	277	64	65.4	72.7	95.1	94.9	140.7	6.0312	6.1839	6.5714	6.5683	7.1365	0.69	0.46	0.46	0
Tb927.3.2840	inorganic pyrophosphatase, putative	Phosphatase	111	241	412	422	30	91.9	108.8	145.2	144.6	66	6.522	6.7655	7.1819	7.1759	6.0444	0.63	1.39	0.63	0
Tb927.11.4170	kinetoplastid-specific dual specificity phosphatase, putative	Phosphatase	106	222	2171	2313	42	87.8	100.2	765	792.3	92.3	6.4561	6.6467	9.5793	9.6299	6.5283	0.11	0.95	0.11	0
Tb927.2.4280	kinetoplastid-specific dual specificity phosphatase, putative	Phosphatase	265	485	692	810	195	219.5	219	243.8	277.5	428.7	7.7781	7.7748	7.9296	8.1163	8.7438	0.79	0.51	0.51	0
Tb927.5.3620	kinetoplastid-specific dual specificity phosphatase, putative	Phosphatase	284	380	568	708	170	235.2	171.6	200.1	242.5	373.7	7.8777	7.4229	7.6446	7.9218	8.5457	0.71	0.46	0.46	0
Tb927.7.7160	kinetoplastid-specific dual specificity phosphatase, putative	Phosphatase	156	295	565	591	89	129.2	133.2	199.1	202.4	195.7	7.0135	7.0575	7.6373	7.6611	7.6125	0.64	0.66	0.64	0
Tb927.10.3490	kinetoplastid-specific dual specificity phosphatase, putative	Phosphatase	107	241	328	305	48	88.6	108.8	115.6	104.5	105.5	6.4692	6.7655	6.853	6.7074	6.7211	0.77	0.84	0.77	0
Tb927.11.7950	kinetoplastid-specific dual specificity phosphatase, putative	Phosphatase	151	237	286	357	46	125.1	107	100.8	122.3	101.1	6.9669	6.7415	6.6554	6.9343	6.6596	0.87	1.06	0.87	0
Tb927.2.4870	kinetoplastid-specific dual specificity phosphatase, putative	Phosphatase	88	148	273	268	34	72.9	66.8	96.2	91.8	74.7	6.1878	6.0618	6.588	6.5204	6.223	0.69	0.89	0.69	0
Tb927.9.9990	kinetoplastid-specific dual specificity phosphatase, putative	Phosphatase	70	131	181	173	26	58	59.1	63.8	59.3	57.2	5.858	5.8851	5.9955	5.89	5.8379	0.91	1.01	0.91	0
Tb927.10.10670	kinetoplastid-specific dual specificity phosphatase, putative	Phosphatase	35	81	114	96	15	29	36.6	40.2	32.9	33	4.858	5.1938	5.3291	5.04	5.0444	0.72	0.88	0.72	0
Tb927.11.12570	kinetoplastid-specific dual specificity phosphatase, putative	Phosphatase	75	150	102	100	13	62.1	67.7	35.9	34.3	28.6	5.9565	6.0811	5.1659	5.1001	4.8379	1.73	2.17	1.73	0
Tb927.11.13130	membrane-bound acid phosphatase 1 precursor (MBAP1)	Phosphatase	203	507	889	824	112	168.2	228.9	313.3	282.3	246.2	7.394	7.8386	8.2914	8.1411	7.9437	0.54	0.68	0.54	0
Tb927.10.7140	membrane-bound acid phosphatase 2 (MBAP2)	Phosphatase	187	549	606	615	164	154.9	247.9	213.5	210.7	360.6	7.2752	7.9536	7.7381	7.719	8.4943	0.73	0.43	0.43	0
Tb927.11.11740	membrane-bound acid phosphatase, putative	Phosphatase	146	297	341	345	64	120.9	134.1	120.2	118.2	140.7	6.9177	7.0672	6.9093	6.8851	7.1365	1.01	0.86	0.86	0
Tb927.11.290	phosphatase and tensin homologue, putative	Phosphatase	111	258	195	197	33	91.9	116.5	68.7	67.5	72.6	6.522	6.8642	6.1022	6.0768	6.1819	1.34	1.27	1.27	0
Tb927.8.5780	phosphatase, putative	Phosphatase	52	141	274	249	38	43.1	63.7	96.6	85.3	83.5	5.4296	5.9932	6.594	6.4145	6.3837	0.45	0.52	0.45	0
Tb927.9.12110	6-phosphogluconate dehydrogenase, decarboxylating (gnD)	PPP	207	366	530	507	64	171.5	165.2	186.8	173.7	140.7	7.4221	7.3681	7.5454	7.4405	7.1365	0.88	1.17	0.88	0
Tb927.10.9430	phosphoribosylpyrophosphate synthetase, putative (PRS)	PPP	236	486	467	433	98	195.5	219.4	164.6	148.3	215.5	7.611	7.7774	7.3628	7.2124	7.7515	1.19	0.91	0.91	0
[truncated: 4,929 more rows]

## Sheet: 3. Ribosomal proteins
Unique_list	Annotation	Bound 2 RPM	Bound 3 RPM	WT_A RPM	WT_B RPM	Unbound 3 RPM	Lowest bound/highest WT	Lowest bound/Unbound3	Lowest ratio	Unbound/WT
Tb927.10.5360	40S ribosomal protein S10	1517.5	1755.3	700.2	528.5	415.5	2.17	3.65	2.17	0.25
Tb927.11.4290	40S ribosomal protein S12	521	685.8	166.3	143.5	118.7	3.13	4.39	3.13	0.2
Tb927.10.8430	40S ribosomal protein S12	846.5	1040.6	423.9	310.3	358.4	2	2.36	2	0.38
Tb927.6.4980	40S ribosomal protein S14	1300.5	1559.8	622.3	479.9	721.1	2.09	1.8	1.8	0.5
Tb927.7.2340	40S ribosomal protein S15	1567.2	2085.8	398.9	312.4	371.5	3.93	4.22	3.93	0.2
Tb927.11.6140	40S ribosomal protein S15A	681.7	880.4	379.2	436.1	312.2	1.56	2.18	1.56	0.4
Tb927.7.1040	40S ribosomal protein S16	1750.3	2130.5	717.4	635.4	718.9	2.44	2.43	2.43	0.37
Tb927.11.11820	40S ribosomal protein S17	1191.1	1381	799.9	587.1	1378.5	1.49	0.86	0.86	1.07
Tb927.10.5340	40S ribosomal protein S18	1070.2	1415.4	488.7	397.7	393.5	2.19	2.72	2.19	0.32
Tb927.4.1860	40S ribosomal protein S19	3926.3	3327.8	577.9	586.4	268.2	5.67	12.41	5.67	0.07
Tb927.10.14710	40S ribosomal protein S2	2209.1	2786	769.6	563.5	870.6	2.87	2.54	2.54	0.35
Tb927.11.6500	40S ribosomal protein S21	1922.5	2119.6	1045.5	856.4	494.7	1.84	3.89	1.84	0.24
Tb927.10.1090	40S ribosomal protein S23	1220.1	1600.9	888.3	945.8	1387.3	1.29	0.88	0.88	0.98
Tb927.10.7340	40S ribosomal protein S24E	1538.2	1596.4	766.8	810.5	938.8	1.9	1.64	1.64	0.6
Tb927.11.8200	40S ribosomal protein S26	800.2	688.5	364.4	255.9	136.3	1.89	5.05	1.89	0.18
Tb927.7.230	40S ribosomal protein S33	802.6	1078.1	507.1	493.6	310	1.58	2.59	1.58	0.33
Tb927.10.3940	40S ribosomal protein S3A	2336.7	2810.4	833.4	783.1	962.9	2.8	2.43	2.43	0.37
Tb927.11.3590	40S ribosomal protein S4	1759.4	2195.9	827.7	727.6	861.8	2.13	2.04	2.04	0.44
Tb927.11.6300	40S ribosomal protein S5	1153.9	1672.2	861.6	672.1	556.2	1.34	2.07	1.34	0.39
Tb927.9.3920	40S ribosomal protein S7	2658.9	2706.6	565.6	519.6	419.9	4.7	6.33	4.7	0.16
Tb927.8.6150	40S ribosomal protein S8	2392.2	2936.4	903.5	794.4	883.8	2.65	2.71	2.65	0.33
Tb927.10.7710	40S ribosomal protein S8	112.7	107.9	90.6	104.5	68.2	1.03	1.58	1.03	0.62
Tb927.11.10910	40S ribosomal protein SA	1851.3	1870.9	875.3	706	314.4	2.12	5.89	2.12	0.17
Tb927.9.5690	60S acidic ribosomal protein	545	727.8	167	139.8	158.3	3.26	3.44	3.26	0.25
Tb927.5.1820	60S acidic ribosomal protein	282.5	341.8	137.1	147.3	81.3	1.92	3.47	1.92	0.26
Tb927.6.5120	60S acidic ribosomal protein P2	550	708.4	200.9	216.8	46.2	2.54	11.9	2.54	0.07
Tb927.10.3380	60S acidic ribosomal protein P2	863.1	736.8	462.3	402.5	499.1	1.59	1.48	1.48	0.62
Tb927.11.2060	60S acidic ribosomal subunit	2417.9	3197.3	996.5	740.2	674.9	2.43	3.58	2.43	0.24
Tb927.10.10010	60S acidic ribosomal subunit	115.1	78.1	72.2	78.1	63.8	1	1.22	1	0.66
Tb927.10.8200	60S Ribosomal protein L1	101.1	101.6	95.8	73.3	66	1.06	1.53	1.06	0.65
Tb927.9.8070	60S ribosomal protein L10	2046.8	2285.3	668.1	588.2	696.9	3.06	2.94	2.94	0.32
Tb927.10.13500	60S ribosomal protein L10a	1528.3	1868.6	552.2	565.9	430.9	2.7	3.55	2.7	0.25
Tb927.9.7590	60S ribosomal protein L11	1846.3	2284.4	528.2	420.6	285.8	3.5	6.46	3.5	0.14
Tb927.3.3310	60S ribosomal protein L13	2576.9	2879	762.5	811.8	637.6	3.17	4.04	3.17	0.23
Tb927.7.5000	60S ribosomal protein L19	1801.6	2488	689.6	461.4	235.2	2.61	7.66	2.61	0.11
Tb927.11.16280	60S ribosomal protein L2 L8	1368.4	1755.8	1057.8	755	565	1.29	2.42	1.29	0.36
Tb927.9.11380	60S ribosomal protein L23	1404	1430.3	665.6	602.2	831	2.11	1.69	1.69	0.59
Tb927.7.5180	60S ribosomal protein L23a or L25	926.9	1120.1	455.6	388.8	312.2	2.03	2.97	2.03	0.31
Tb927.10.5480	60S ribosomal protein L24	1223.4	1144.9	436.2	355.9	259.4	2.62	4.41	2.62	0.22
Tb927.11.6360	60S ribosomal protein L24	142.5	153	142	117.5	87.9	1	1.62	1	0.59
Tb927.11.15880	60S ribosomal protein L27	1274	1442.4	632.5	493.6	908	2.01	1.4	1.4	0.67
Tb927.9.11490	60S ribosomal protein L27a	2112.2	2264.1	1097.3	938.9	598	1.92	3.53	1.92	0.27
Tb927.11.6180	60S ribosomal protein L28	1641.7	1956.7	847.5	740.6	2930.6	1.94	0.56	0.56	1.63
Tb927.4.1790	60S ribosomal protein L3	2427.8	2840.2	1267.5	1013.6	1233.4	1.92	1.97	1.92	0.47
Tb927.10.4120	60S ribosomal protein L30	1194.4	1141.3	901	759.4	870.6	1.27	1.31	1.27	0.75
Tb927.9.12200	60S ribosomal protein L31	1961.5	2489	862.6	895.8	2090.8	2.19	0.94	0.94	0.94
Tb927.9.1810	60S ribosomal protein L35	1346.9	1447	926.4	677.6	2574.4	1.45	0.52	0.52	1.84
Tb927.4.2180	60S ribosomal protein L35a	1065.2	970.2	463	437.4	184.7	2.1	5.25	2.1	0.18
Tb927.9.15210	60S ribosomal protein L36	677.6	711.1	288.6	222.7	92.3	2.35	7.34	2.35	0.13
Tb927.10.1590	60S ribosomal protein L36	453.1	545.4	185.3	151.4	85.7	2.45	5.29	2.45	0.17
Tb927.10.3280	60S ribosomal protein L38	919.4	1025.3	538.8	536.8	941	1.71	0.98	0.98	0.97
Tb927.8.5260	60S ribosomal protein L39	445.6	391	307.3	334.7	367.1	1.17	1.07	1.07	0.88
Tb927.3.5050	60S ribosomal protein L4	2345.8	2750.8	858.4	818.7	745.3	2.73	3.15	2.73	0.29
Tb927.11.3230	60S ribosomal protein L44	921.9	1014	413	369.6	472.7	2.23	1.95	1.95	0.49
Tb927.9.15150	60S ribosomal protein L5	1651.7	2141.8	618.1	425.4	349.6	2.67	4.72	2.67	0.18
Tb927.10.11390	60S ribosomal protein L6	1807.4	2126	947.9	919.7	576	1.91	3.14	1.91	0.29
Tb927.7.1740	60S ribosomal protein L7	1523.3	1914.2	528.6	424.8	362.8	2.88	4.2	2.88	0.21
Tb927.10.13730	60S ribosomal protein L7	125.1	115.6	98	106.9	87.9	1.08	1.32	1.08	0.73
Tb927.4.5170	60S ribosomal protein L7/L12, putative	25.7	55.1	65.5	73.3	79.1	0.35	0.32	0.32	1.96
Tb927.8.1330	60S ribosomal protein L7a	2731.8	2947.6	1110.3	872.1	892.6	2.46	3.06	2.46	0.31
